# Supplementary material for: Electrocatalytic CO2 Reduction and H2 Evolution by a Copper (II) Complex with Redox-Active Ligand
Source: MDPI journal article supplement (doi:10.3390/molecules27041399), 2022-02-18

# checkCIF/PLATON report

Structure factors have been supplied for datablock(s) mo\_20180625-zghy-6\_0m\_sq\_s

THIS REPORT IS FOR GUIDANCE ONLY. IF USED AS PART OF A REVIEW PROCEDURE FOR PUBLICATION, IT SHOULD NOT REPLACE THE EXPERTISE OF AN EXPERIENCED CRYSTALLOGRAPHIC REFEREE.

No syntax errors found.      CIF dictionary      Interpreting this report

## Datablock: mo\_20180625-zghy-6\_0m\_sq\_s

---

Bond precision:    C-C = 0.0125 Å                      Wavelength=0.71073

Cell:                      a=27.32(2)              b=13.544(13)              c=21.773(19)  
                            alpha=90              beta=121.34(2)              gamma=90  
Temperature:              173 K

|                        | Calculated                      | Reported         |
|------------------------|---------------------------------|------------------|
| Volume                 | 6881(10)                        | 6881(11)         |
| Space group            | C 2/c                           | C 1 2/c 1        |
| Hall group             | -C 2yc                          | -C 2yc           |
| Moiety formula         | C26 H18 Cu N9 O9 [+<br>solvent] | C26 H18 Cu N9 O9 |
| Sum formula            | C26 H18 Cu N9 O9 [+<br>solvent] | C26 H18 Cu N9 O9 |
| Mr                     | 664.04                          | 664.03           |
| Dx, g cm <sup>-3</sup> | 1.282                           | 1.282            |
| Z                      | 8                               | 8                |
| Mu (mm <sup>-1</sup> ) | 0.693                           | 0.693            |
| F000                   | 2704.0                          | 2704.0           |
| F000'                  | 2707.75                         |                  |
| h,k,lmax               | 33,16,26                        | 33,16,26         |
| Nref                   | 6413                            | 6343             |
| Tmin,Tmax              | 0.905,0.946                     | 0.658,0.746      |
| Tmin'                  | 0.877                           |                  |

Correction method= # Reported T Limits: Tmin=0.658 Tmax=0.746  
AbsCorr = MULTI-SCAN

Data completeness= 0.989                      Theta(max)= 25.495

R(reflections)= 0.0908( 3448)              wR2(reflections)= 0.3016( 6343)

S = 1.040                      Npar= 408

---

The following ALERTS were generated. Each ALERT has the format

**test-name\_ALERT\_alert-type\_alert-level.**

Click on the hyperlinks for more details of the test.

---

**Alert level B**

|                   |                                                |     |               |   |             |
|-------------------|------------------------------------------------|-----|---------------|---|-------------|
| PLAT232_ALERT_2_B | Hirshfeld Test Diff (M-X)                      | Cu1 | --O4          | . | 34.5 s.u.   |
| PLAT241_ALERT_2_B | High 'MainMol' Ueq as Compared to Neighbors of |     |               |   | 04 Check    |
| PLAT430_ALERT_2_B | Short Inter D...A Contact                      | 01  | ..08          | . | 2.76 Ang.   |
|                   |                                                |     | 1-x,1-y,1-z = |   | 5_666 Check |
| PLAT430_ALERT_2_B | Short Inter D...A Contact                      | 08  | ..N1          | . | 2.82 Ang.   |
|                   |                                                |     | 1-x,1-y,1-z = |   | 5_666 Check |

---

**Alert level C**

|                   |                                                |                   |       |  |              |
|-------------------|------------------------------------------------|-------------------|-------|--|--------------|
| PLAT084_ALERT_3_C | High wR2 Value (i.e. > 0.25)                   |                   |       |  | 0.30 Report  |
| PLAT220_ALERT_2_C | Non-Solvent Resd 1 N                           | Ueq(max)/Ueq(min) | Range |  | 3.3 Ratio    |
| PLAT220_ALERT_2_C | Non-Solvent Resd 1 O                           | Ueq(max)/Ueq(min) | Range |  | 3.6 Ratio    |
| PLAT234_ALERT_4_C | Large Hirshfeld Difference N8                  | --C12             | .     |  | 0.19 Ang.    |
| PLAT241_ALERT_2_C | High 'MainMol' Ueq as Compared to Neighbors of |                   |       |  | 03 Check     |
| PLAT242_ALERT_2_C | Low 'MainMol' Ueq as Compared to Neighbors of  |                   |       |  | Cu1 Check    |
| PLAT242_ALERT_2_C | Low 'MainMol' Ueq as Compared to Neighbors of  |                   |       |  | N1 Check     |
| PLAT242_ALERT_2_C | Low 'MainMol' Ueq as Compared to Neighbors of  |                   |       |  | N8 Check     |
| PLAT242_ALERT_2_C | Low 'MainMol' Ueq as Compared to Neighbors of  |                   |       |  | N9 Check     |
| PLAT242_ALERT_2_C | Low 'MainMol' Ueq as Compared to Neighbors of  |                   |       |  | C12 Check    |
| PLAT260_ALERT_2_C | Large Average Ueq of Residue Including         | Cu1               |       |  | 0.102 Check  |
| PLAT341_ALERT_3_C | Low Bond Precision on C-C Bonds                |                   |       |  | 0.01255 Ang. |

---

**Alert level G**

|                   |                                                    |      |      |   |              |
|-------------------|----------------------------------------------------|------|------|---|--------------|
| PLAT003_ALERT_2_G | Number of Uiso or Uij Restrained non-H Atoms ...   |      |      |   | 45 Report    |
| PLAT012_ALERT_1_G | No _shelx_res_checksum Found in CIF                |      |      |   | Please Check |
| PLAT014_ALERT_1_G | No _shelx_fab_checksum Found in CIF                |      |      |   | Please Check |
| PLAT072_ALERT_2_G | SHELXL First Parameter in WGHT Unusually Large     |      |      |   | 0.18 Report  |
| PLAT128_ALERT_4_G | Alternate Setting for Input Space Group            | C2/c |      |   | I2/a Note    |
| PLAT232_ALERT_2_G | Hirshfeld Test Diff (M-X)                          | Cu1  | --O3 | . | 8.5 s.u.     |
| PLAT606_ALERT_4_G | VERY LARGE Solvent Accessible VOID(S) in Structure |      |      |   | ! Info       |
| PLAT794_ALERT_5_G | Tentative Bond Valency for Cu1                     | (II) | .    |   | 2.25 Info    |
| PLAT860_ALERT_3_G | Number of Least-Squares Restraints                 |      |      |   | 408 Note     |
| PLAT869_ALERT_4_G | ALERTS Related to the Use of SQUEEZE Suppressed    |      |      |   | ! Info       |

---

0 **ALERT level A** = Most likely a serious problem - resolve or explain  
4 **ALERT level B** = A potentially serious problem, consider carefully  
12 **ALERT level C** = Check. Ensure it is not caused by an omission or oversight  
10 **ALERT level G** = General information/check it is not something unexpected

2 **ALERT type 1** CIF construction/syntax error, inconsistent or missing data  
16 **ALERT type 2** Indicator that the structure model may be wrong or deficient  
3 **ALERT type 3** Indicator that the structure quality may be low  
4 **ALERT type 4** Improvement, methodology, query or suggestion  
1 **ALERT type 5** Informative message, check

---

It is advisable to attempt to resolve as many as possible of the alerts in all categories. Often the minor alerts point to easily fixed oversights, errors and omissions in your CIF or refinement strategy, so attention to these fine details can be worthwhile. In order to resolve some of the more serious problems it may be necessary to carry out additional measurements or structure refinements. However, the purpose of your study may justify the reported deviations and the more serious of these should normally be commented upon in the discussion or experimental section of a paper or in the "special\_details" fields of the CIF. checkCIF was carefully designed to identify outliers and unusual parameters, but every test has its limitations and alerts that are not important in a particular case may appear. Conversely, the absence of alerts does not guarantee there are no aspects of the results needing attention. It is up to the individual to critically assess their own results and, if necessary, seek expert advice.

### **Publication of your CIF in IUCr journals**

A basic structural check has been run on your CIF. These basic checks will be run on all CIFs submitted for publication in IUCr journals (*Acta Crystallographica*, *Journal of Applied Crystallography*, *Journal of Synchrotron Radiation*); however, if you intend to submit to *Acta Crystallographica Section C* or *E* or *IUCrData*, you should make sure that full publication checks are run on the final version of your CIF prior to submission.

### **Publication of your CIF in other journals**

Please refer to the *Notes for Authors* of the relevant journal for any special instructions relating to CIF submission.

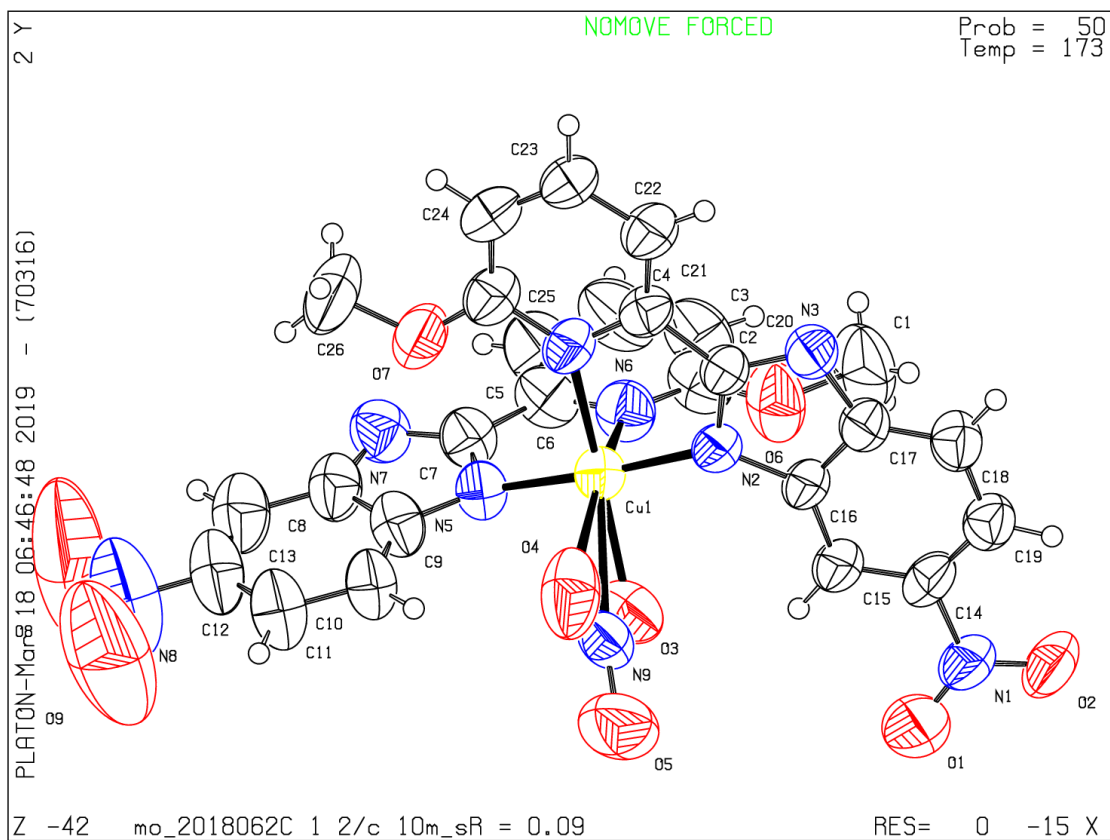

Supplement: s1 [file s1]
