# Supplementary material for: Electrocatalytic CO2 Reduction and H2 Evolution by a Copper (II) Complex with Redox-Active Ligand
Source: MDPI journal article supplement (doi:10.3390/molecules27041399), 2022-02-18
Supplement: s1 [file s1]

## SUPPORTING INFORMATION:

### Electrocatalytic CO<sub>2</sub> reduction and H<sub>2</sub> evolution by a copper (II) complex with redox-active ligand

Jingjing Li <sup>1</sup>, Shifu Zhang <sup>1</sup>, Jinmiao Wang <sup>1</sup>, Xiaomeng Yin <sup>1</sup>, Zhenxing Han <sup>1</sup>, Guobo Chen <sup>1</sup>, Dongmei Zhang <sup>1</sup> and Mei wang <sup>1,2\*</sup>

| Contents                                                                                                                                                                                                                                                                                              | Page No |
|-------------------------------------------------------------------------------------------------------------------------------------------------------------------------------------------------------------------------------------------------------------------------------------------------------|---------|
| Table S1. Crystallogical data for the complex 1 .....                                                                                                                                                                                                                                                 | 2       |
| Table S2. The main key length of the complex 1.....                                                                                                                                                                                                                                                   | 2       |
| Table S3. The main key angle of the complex 1 .....                                                                                                                                                                                                                                                   | 3       |
| Table S4. Cartesian coordinates for 1 .....                                                                                                                                                                                                                                                           | 3       |
| Figure S1. IR spectrum of the complex 1.. .....                                                                                                                                                                                                                                                       | 5s      |
| Figure S2. HOMO-LUMO orbitals of complex 1.....                                                                                                                                                                                                                                                       | 6       |
| Figure S3. (a) LUMO+1 orbital; (b) LUMO+2 orbital; (c) HOMO-1 orbital; (d) HOMO-2 orbital.....                                                                                                                                                                                                        | 6       |
| Figure S4. Powder X-ray diffraction (PXRD) patterns of complex 1 .....                                                                                                                                                                                                                                | 7       |
| Figure S5. Cyclic voltammetry of 2 mM ligand L <sup>1</sup> under 1 atm Ar at scan rate 100 mV s <sup>-1</sup> .....                                                                                                                                                                                  | 7       |
| Table S5. The reduction potentials and peak currents of complex 1 under 1 atm Ar in a 0.1 M <sup>n</sup> Bu <sub>4</sub> NPF <sub>6</sub> CH <sub>3</sub> CN supporting electrolyte. ....                                                                                                             | 7       |
| Table S6. The reduction potentials and peak currents of complex 1 under 1 atm CO <sub>2</sub> in a 0.1 M <sup>n</sup> Bu <sub>4</sub> NPF <sub>6</sub> CH <sub>3</sub> CN supporting electrolyte. ....                                                                                                | 8       |
| Table S7. The reduction potentials and peak currents of complex 1 containing different concentrations of H <sub>2</sub> O under CO <sub>2</sub> . ....                                                                                                                                                | 8       |
| Table S8. The reduction potentials and peak currents of complex 1 with different concentrations under 1 atm CO <sub>2</sub> in a 0.1 M <sup>n</sup> Bu <sub>4</sub> NPF <sub>6</sub> CH <sub>3</sub> CN supporting electrolyte.....                                                                   | 8       |
| Figure S6. (a) CPE for H <sub>2</sub> evolution (black line) at -1.97 V vs NHE on GCE (0.07 cm <sup>2</sup> ); (b) CPE for CO <sub>2</sub> reduction (red line) at -1.15 V vs NHE on GCE (0.07 cm <sup>2</sup> ) at the same condition as using FTO. ....                                             | 9       |
| Figure S7. CPE with 2 mM complex 1 (rose red line), rinse test (green line) and the blank experiment without 1 (blue line) on an FTO working electrode (1.0 cm <sup>2</sup> ). ....                                                                                                                   | 10      |
| Figure S8. The in-situ UV-Vis spectroelectrochemistry of complex 1 in CO <sub>2</sub> atmosphere.....                                                                                                                                                                                                 | 10      |
| Figure S9. (a) The amount of material in the proton supply system that is combined with the electrocatalytic reduction CO <sub>2</sub> product. (b) The Faraday efficiency curves of the electrocatalytic reduction products CO and H <sub>2</sub> in the proton supply H <sub>2</sub> O system. .... | 11      |
| Figure S10. Cyclic voltammetry of complex 1 in the presence (green) and absence (black) of CO <sub>2</sub> recorded at 100 mV s <sup>-1</sup> at glassy carbon in a 0.1 M <sup>n</sup> Bu <sub>4</sub> NPF <sub>6</sub> CH <sub>3</sub> CN supporting electrolyte. ....                               | 12      |
| Figure S11. Cyclic voltammograms of complex 1 (2 mM) recorded in the presence of 0.58 mM TsOH·H <sub>2</sub> O under 1 atm Ar at scan rate range from 100 to 500 mV s <sup>-1</sup> in CH <sub>3</sub> CN (0.1 M <sup>n</sup> Bu <sub>4</sub> NBF <sub>6</sub> ) at a glassy carbon electrode. ....   | 13      |
| Figure S12. The <i>in-situ</i> UV-Vis spectroelectrochemistry of complex 1 in Ar atmosphere. ....                                                                                                                                                                                                     | 13      |
| Figure S13. Cyclic voltammograms of complex 1 (2 mM, red trace) and in the presence of 10 mM TsOH·H <sub>2</sub> O (black trace) in CH <sub>3</sub> CN (0.1 M <sup>n</sup> Bu <sub>4</sub> NPF <sub>6</sub> ) at a glassy carbon electrode and 100 mV s <sup>-1</sup> .....                           | 13      |
| Figure S14. Cyclic voltammograms recorded in the absence (black trace) or in the presence of 10 mM of TsOH·H <sub>2</sub> O (red trace). Scan rate: 100 mV s <sup>-1</sup> . Working electrode: glassy carbon. Counter electrode: Pt wire. Reference                                                  |         |

|                                                                                                                                                                                                                                                                                                                                                                                                                                          |    |
|------------------------------------------------------------------------------------------------------------------------------------------------------------------------------------------------------------------------------------------------------------------------------------------------------------------------------------------------------------------------------------------------------------------------------------------|----|
| electrode: Ag/AgCl.....                                                                                                                                                                                                                                                                                                                                                                                                                  | 14 |
| Figure S15. DLS spectra of the electrolyte before and after the CPE test. (a) DLS of the complex 1 containing 0.58mM TsOH·H <sub>2</sub> O in CH <sub>3</sub> CN (0.1 M <sup>n</sup> Bu <sub>4</sub> NPF <sub>6</sub> ) before and after 4000 s electrolysis; (b) DLS of the complex 1 in CH <sub>3</sub> CN (0.1 M <sup>n</sup> Bu <sub>4</sub> NPF <sub>6</sub> ) under 1atm CO <sub>2</sub> before and after 4000 s electrolysis..... | 15 |
| Figure S16. The Faraday efficiency curves of the electrocatalytic hydrogen evolution products H <sub>2</sub> in the proton supply 0.58 mM TsOH·H <sub>2</sub> O system. ....                                                                                                                                                                                                                                                             | 16 |
| Figure S17. Plot of the magnetic moments ( $\mu_{\text{eff}}$ ) versus the temperature T for solid sample of complex 1. ....                                                                                                                                                                                                                                                                                                             | 17 |
| Table S9. The molecular geometry of complex 1 as predicted by SHAPE 2.1. ....                                                                                                                                                                                                                                                                                                                                                            | 17 |

**Table S1.** Crystallogical data for the complex 1

| Parameter                                                                                                      | 1                                                                 |
|----------------------------------------------------------------------------------------------------------------|-------------------------------------------------------------------|
| Empirical formula                                                                                              | C <sub>26</sub> H <sub>18</sub> CuN <sub>10</sub> O <sub>12</sub> |
| Formula weight                                                                                                 | 726.03                                                            |
| Temperature (K)                                                                                                | 173                                                               |
| Wavelength (Å)                                                                                                 | 0.71073                                                           |
| Crystal system                                                                                                 | Monoclinic                                                        |
| Space group                                                                                                    | <i>C</i> 12 / <i>c</i> 1                                          |
| <i>a</i> (Å)                                                                                                   | 27.32(2)                                                          |
| <i>b</i> (Å)                                                                                                   | 13.544(13)                                                        |
| <i>c</i> (Å)                                                                                                   | 21.773(19)                                                        |
| $\alpha$ (°)                                                                                                   | 90                                                                |
| $\beta$ (°)                                                                                                    | 121.34(2)                                                         |
| $\gamma$ (°)                                                                                                   | 90                                                                |
| Volume (Å <sup>3</sup> )                                                                                       | 6881(11)                                                          |
| <i>Z</i>                                                                                                       | 8                                                                 |
| Calculated density(g/cm <sup>3</sup> )                                                                         | 1.282                                                             |
| Absorption coefficient (mm <sup>-1</sup> )                                                                     | 0.693                                                             |
| <i>F</i> (000)                                                                                                 | 2704                                                              |
| Crystal size (mm)                                                                                              | 0.19 × 0.12 × 0.08                                                |
| $\vartheta$ range for data collection (°)                                                                      | 1.738 to 25.495                                                   |
| Limiting indices                                                                                               | -32 ≤ <i>h</i> ≤ 33<br>-16 ≤ <i>k</i> ≤ 16<br>-26 ≤ <i>l</i> ≤ 24 |
| Reflections collected / unique                                                                                 | 24001/6343<br>[ <i>R</i> <sub>int</sub> = 0.0700]                 |
| Completeness to $\vartheta$ = 25.495                                                                           | 0.989                                                             |
| Max. and min. transmission                                                                                     | 0.7455 and 0.6580                                                 |
| Data / restraints / parameters                                                                                 | 6343 / 408 / 408                                                  |
| Goodness of fit on <i>F</i> <sup>2</sup>                                                                       | 1.040                                                             |
| <i>R</i> <sub>1</sub> <sup>a</sup> , <i>wR</i> <sub>2</sub> <sup>b</sup> [ <i>I</i> > 2 $\sigma$ ( <i>I</i> )] | <i>R</i> <sub>1</sub> = 0.0908<br><i>wR</i> <sub>2</sub> = 0.2737 |
| <i>R</i> <sub>1</sub> <sup>a</sup> , <i>wR</i> <sub>2</sub> <sup>b</sup> (all data)                            | <i>R</i> <sub>1</sub> = 0.1447<br><i>wR</i> <sub>2</sub> = 0.3016 |
| Largest diff. peak and hole (e. Å <sup>-3</sup> )                                                              | 0.951 and -0.555                                                  |

**Table S2.** The main key length of the complex 1

| bond       | d. Å   | bond       | d. Å   |
|------------|--------|------------|--------|
| Cu(1)-N(2) | 1.9419 | Cu(1)-N(6) | 2.2273 |
| Cu(1)-N(4) | 2.2248 | Cu(1)-O(3) | 2.0792 |
| Cu(1)-N(5) | 1.9525 | Cu(1)-O(4) | 2.5717 |

**Table S3. The main key angle of the complex 1**

| Angle           | $\omega$ , deg | Angle           | $\omega$ , deg |
|-----------------|----------------|-----------------|----------------|
| N(2)-Cu(1)-N(5) | 176.025        | O(4)-Cu(1)-N(6) | 161.059        |
| N(2)-Cu(1)-N(4) | 78.854         | O(4)-Cu(1)-O(3) | 52.789         |
| N(2)-Cu(1)-N(6) | 98.572         | O(4)-Cu(1)-N(4) | 100.994        |
| N(5)-Cu(1)-N(4) | 97.976         | O(3)-Cu(1)-N(2) | 91.4           |
| N(5)-Cu(1)-N(6) | 79.378         | O(3)-Cu(1)-N(2) | 91.471         |
| N(4)-Cu(1)-N(6) | 97.506         | O(3)-Cu(1)-N(4) | 152.574        |
| O(4)-Cu(1)-N(5) | 93.984         | O(3)-Cu(1)-N(6) | 109.36         |
| O(4)-Cu(1)-N(2) | 89.003         | O(3)-Cu(1)-N(5) | 92.424         |

**Table S4. Cartesian coordinates for 1**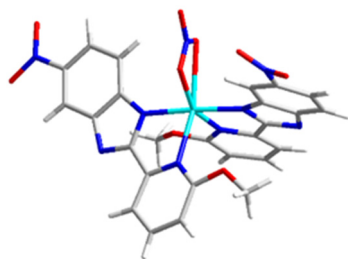

| Coordinates (Angstroms) |         |         |         |
|-------------------------|---------|---------|---------|
| Symbol                  | X       | Y       | Z       |
| Cu                      | 10.5242 | 7.5612  | 11.1395 |
| O                       | 11.4512 | 1.7607  | 12.1601 |
| O                       | 13.5208 | 1.1038  | 12.2698 |
| O                       | 9.4717  | 5.8131  | 11.539  |
| O                       | 9.0756  | 7.0551  | 13.2033 |
| O                       | 8.2652  | 5.0424  | 13.1029 |
| O                       | 13.0844 | 6.1408  | 9.4915  |
| O                       | 9.9505  | 10.9124 | 11.022  |
| O                       | 3.8773  | 11.4894 | 9.0973  |
| O                       | 3.4229  | 10.5901 | 11.1894 |
| N                       | 12.6422 | 1.9815  | 12.2679 |
| N                       | 12.0746 | 6.9088  | 12.1099 |
| N                       | 14.0874 | 7.2447  | 12.9634 |
| N                       | 11.4834 | 9.4727  | 11.7528 |
| N                       | 9.0431  | 8.3174  | 10.1163 |

---

|   |         |         |         |
|---|---------|---------|---------|
| N | 11.359  | 7.4655  | 9.0768  |
| N | 8.4829  | 9.5553  | 8.3534  |
| N | 4.1293  | 10.7485 | 10.1684 |
| N | 8.9744  | 6.0325  | 12.6473 |
| C | 14.3797 | 5.5422  | 9.1456  |
| H | 14.2384 | 4.7824  | 8.5431  |
| H | 14.8251 | 5.2334  | 9.962   |
| H | 14.9427 | 6.2113  | 8.7012  |
| C | 12.4359 | 6.898   | 8.5915  |
| C | 12.8513 | 7.1025  | 7.2544  |
| H | 13.6159 | 6.6555  | 6.9141  |
| C | 12.143  | 7.9449  | 6.4659  |
| H | 12.4588 | 8.1724  | 5.5975  |
| C | 10.9686 | 8.4596  | 6.9364  |
| H | 10.3977 | 8.9661  | 6.3711  |
| C | 10.6284 | 8.2212  | 8.2846  |
| C | 9.3865  | 8.7332  | 8.9243  |
| C | 7.4688  | 9.6257  | 9.2739  |
| C | 7.8106  | 8.8645  | 10.386  |
| C | 6.9591  | 8.7359  | 11.4478 |
| H | 7.2017  | 8.232   | 12.2159 |
| C | 5.7053  | 9.3779  | 11.3623 |
| H | 5.0767  | 9.2709  | 12.0671 |
| C | 5.3768  | 10.1485 | 10.2912 |
| C | 6.188   | 10.284  | 9.2237  |
| H | 5.9222  | 10.7932 | 8.4669  |
| C | 13.0707 | 3.363   | 12.4929 |
| C | 12.2098 | 4.3612  | 12.1526 |
| H | 11.3453 | 4.1865  | 11.7956 |

---

---

|   |         |         |         |
|---|---------|---------|---------|
| C | 12.6817 | 5.6573  | 12.3646 |
| C | 13.9267 | 5.87    | 12.9132 |
| C | 14.7688 | 4.842   | 13.2666 |
| H | 15.6184 | 5.0045  | 13.6571 |
| C | 14.3064 | 3.5323  | 13.0211 |
| H | 14.8495 | 2.7806  | 13.2238 |
| C | 12.9475 | 7.8027  | 12.4799 |
| C | 12.6811 | 9.2208  | 12.3163 |
| C | 13.5329 | 10.2068 | 12.7793 |
| H | 14.3423 | 9.9955  | 13.2312 |
| C | 13.1488 | 11.5259 | 12.5487 |
| H | 13.7179 | 12.2384 | 12.8165 |
| C | 11.9662 | 11.7995 | 11.9425 |
| H | 11.7134 | 12.7002 | 11.7789 |
| C | 11.1404 | 10.777  | 11.5669 |
| C | 9.415   | 12.2505 | 10.8918 |
| H | 9.9985  | 12.7788 | 10.306  |
| H | 9.3716  | 12.6718 | 11.7751 |
| H | 8.5168  | 12.2059 | 10.505  |

---

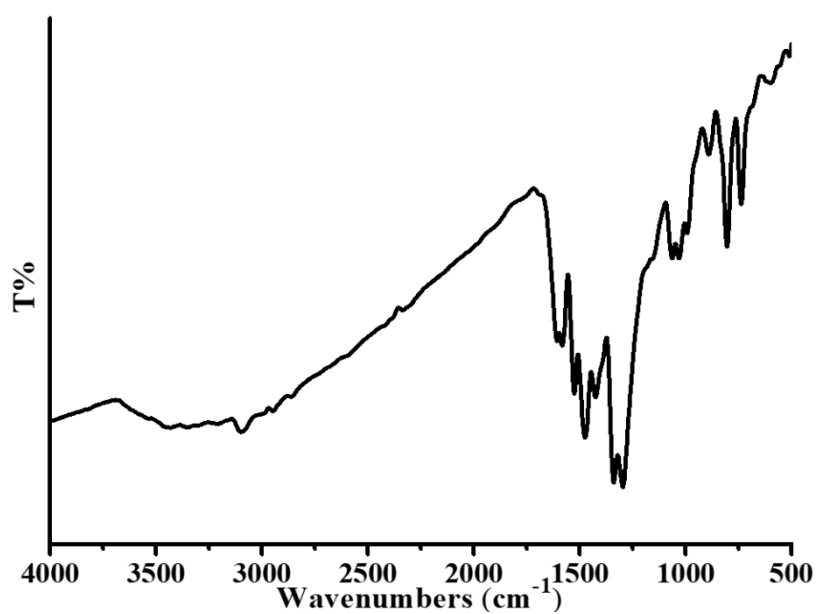

**Figure S1.** IR spectrum of the complex **1**.

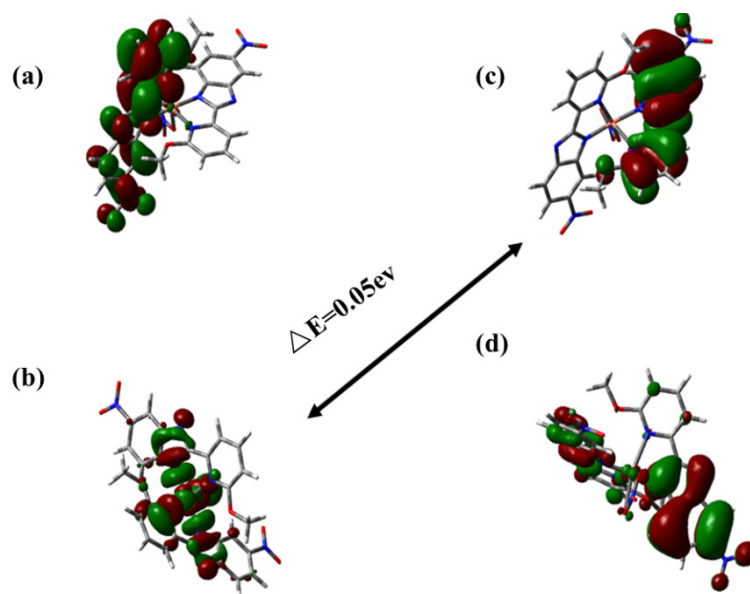

**Figure S2.** HOMO-LUMO orbitals of complex **1**.

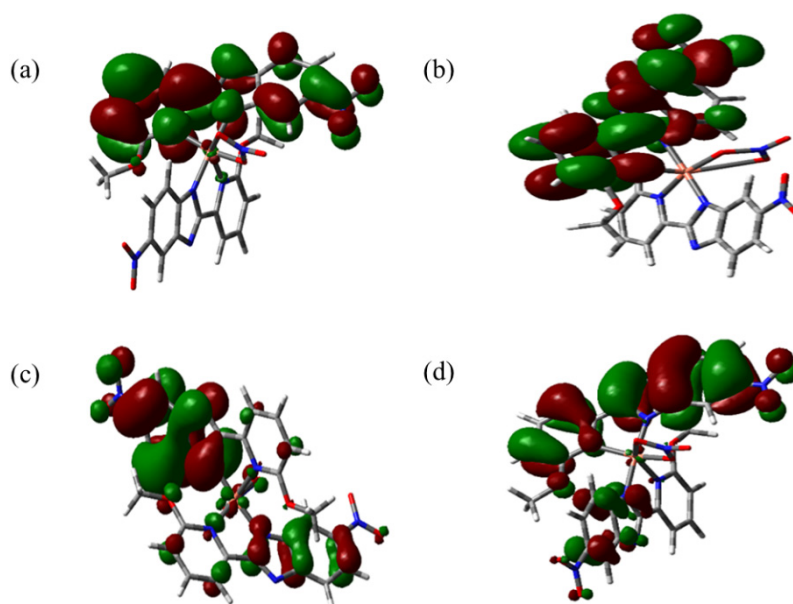

**Figure S3.** (a) LUMO+1 orbital; (b) LUMO+2 orbital; (c) HOMO-1 orbital; (d) HOMO-2 orbital.

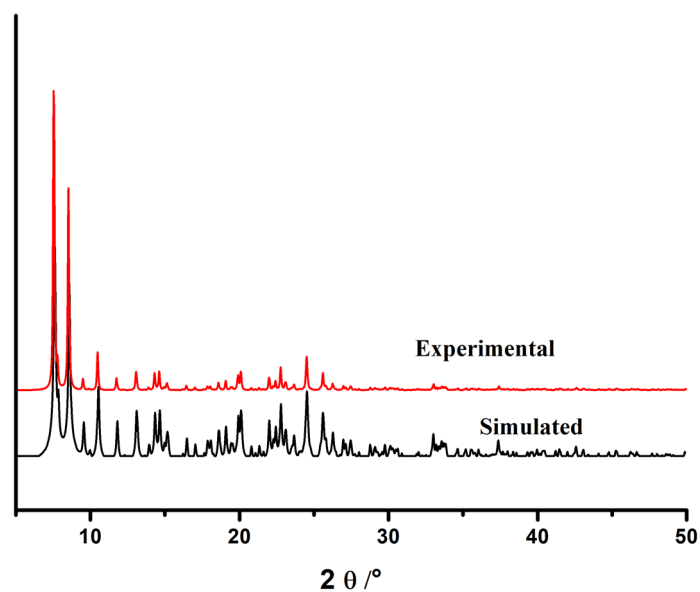

**Figure S4.** Powder X-ray diffraction (PXRD) patterns of complex **1**

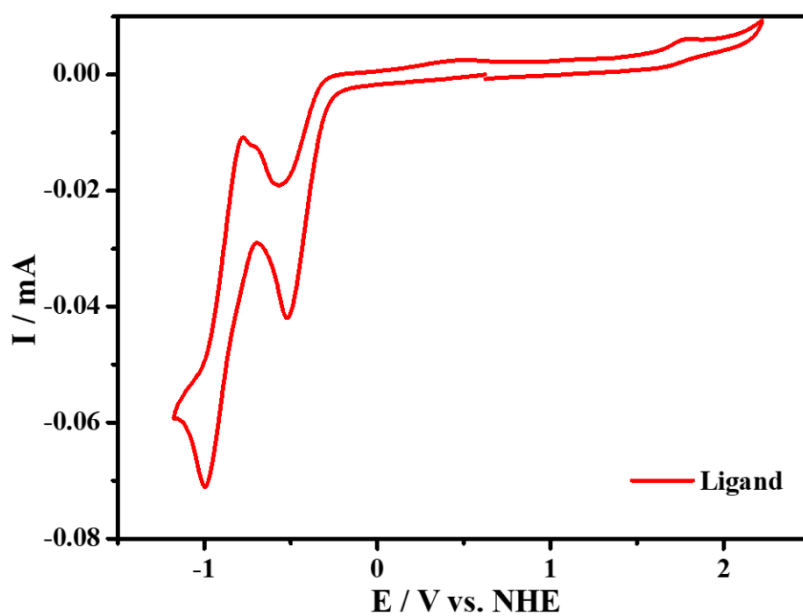

**Figure S5.** Cyclic voltammetry of 2 mM ligand **L**<sup>1</sup> under 1 atm Ar at scan rate 100 mV s<sup>-1</sup>.

**Table S5.** The reduction potentials and peak currents of complex **1** under 1 atm Ar in a 0.1 M <sup>n</sup>Bu<sub>4</sub>NPF<sub>6</sub> CH<sub>3</sub>CN supporting electrolyte.

| v/V s <sup>-1</sup> | Potential(V) | Peak        | Potential(V) | Peak        | Potential(V) | Peak        |
|---------------------|--------------|-------------|--------------|-------------|--------------|-------------|
|                     |              | current(mA) | -1.97        | current(mA) | -2.66        | current(mA) |
| 0.1                 | -1.38        | -0.17       |              | -0.44       |              | -0.71       |
| 0.2                 | -1.38        | -0.29       | -1.97        | -0.58       | -2.62        | -0.76       |
| 0.3                 | -1.38        | -0.35       | -1.97        | -0.71       | -2.66        | -0.79       |
| 0.4                 | -1.38        | -0.45       | -1.97        | -0.91       | -2.66        | -0.96       |
| 0.5                 | -1.38        | -0.51       | -1.97        | -1.07       | -2.66        | -1.09       |

**Table S6.** The reduction potentials and peak currents of complex **1** under 1 atm CO<sub>2</sub> in a 0.1 M <sup>n</sup>Bu<sub>4</sub>NPF<sub>6</sub> CH<sub>3</sub>CN supporting electrolyte.

| $v / V s^{-1}$ | Potential (V) | Peak current (mA) |
|----------------|---------------|-------------------|
| 0.1            | -1.15         | -0.09             |
| 0.2            | -1.22         | -0.14             |
| 0.3            | -1.31         | -0.18             |
| 0.4            | -1.33         | -0.24             |
| 0.5            | -1.35         | -0.27             |

**Table S7.** The reduction potentials and peak currents of complex **1** containing different concentrations of H<sub>2</sub>O under CO<sub>2</sub>.

| N <sub>H<sub>2</sub>O</sub> (mM) | Potential (V) | Peak current (mA) |
|----------------------------------|---------------|-------------------|
| 0                                | -1.15         | -0.09             |
| 0.083                            | -1.15         | -0.115            |
| 0.139                            | -1.15         | -0.146            |

**Table S8.** The reduction potentials and peak currents of complex **1** with different concentrations under 1 atm CO<sub>2</sub> in a 0.1 M <sup>n</sup>Bu<sub>4</sub>NPF<sub>6</sub> CH<sub>3</sub>CN supporting electrolyte.

| N <sub>complex</sub> (mM) | Potential (V) | Peak current (mA) |
|---------------------------|---------------|-------------------|
| 0.5                       | -1.24         | -0.04             |
| 1.0                       | -1.15         | -0.065            |
| 2.0                       | -1.15         | -0.09             |
| 4.0                       | -1.15         | -0.138            |



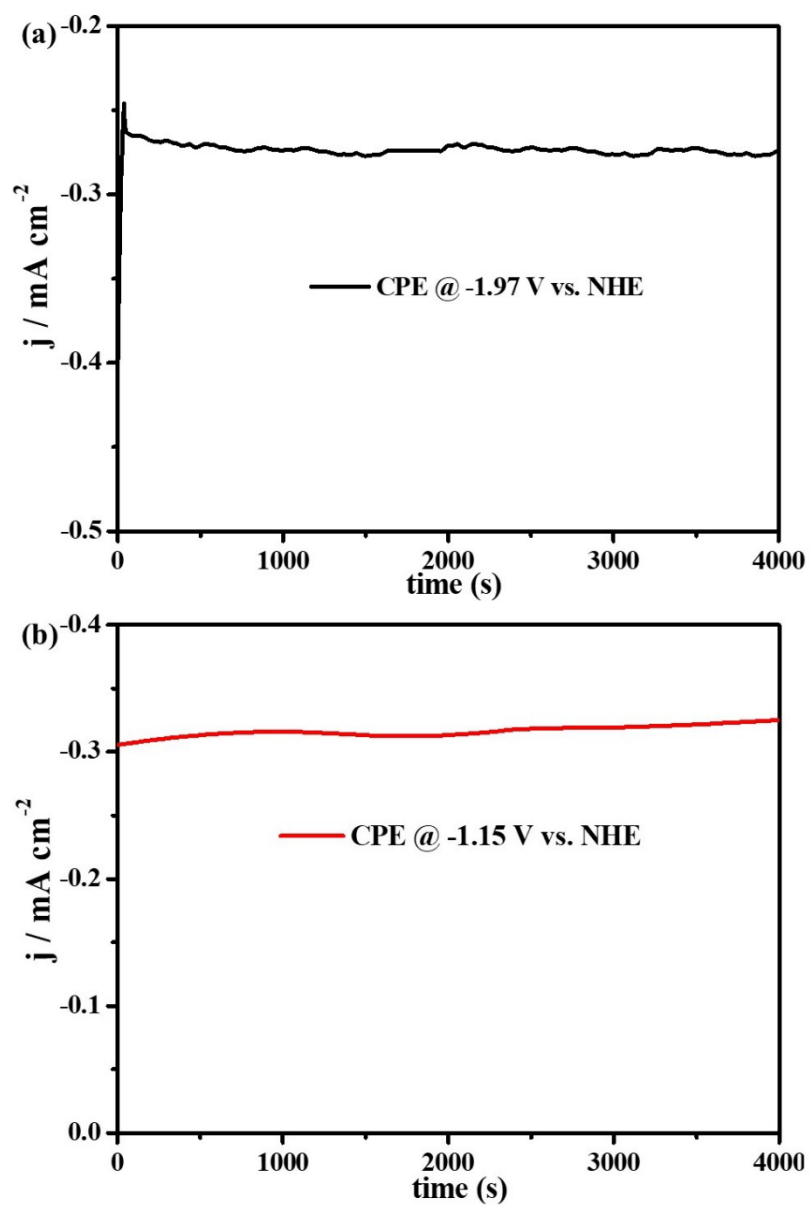

**Figure S6.** (a) CPE for H<sub>2</sub> evolution (black line) at -1.97 V vs NHE on GCE (0.07 cm<sup>2</sup>); (b) CPE for CO<sub>2</sub> reduction (red line) at -1.15 V vs NHE on GCE (0.07 cm<sup>2</sup>) at the same condition as using FTO.

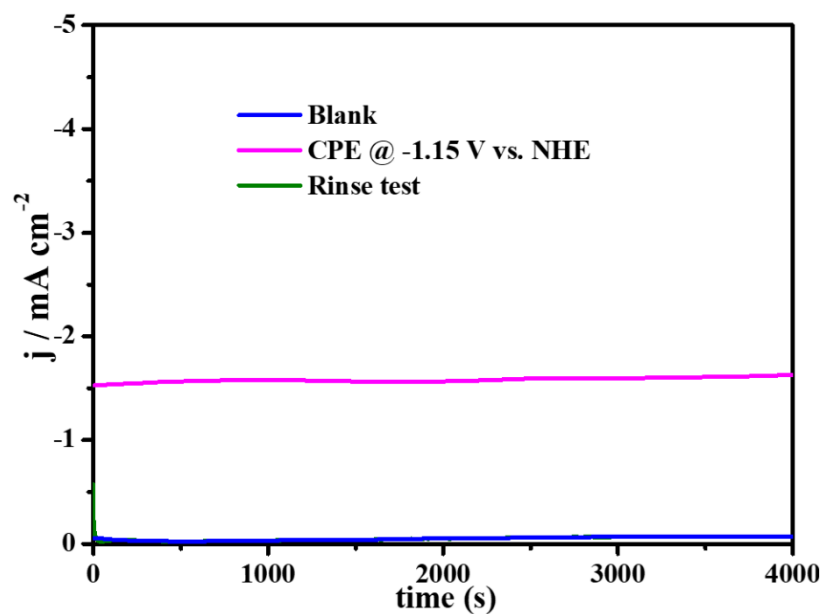

**Figure S7.** CPE with 2 mM complex **1** (rose red line), rinse test (green line) and the blank experiment without **1** (blue line) on an FTO working electrode ( $1.0 \text{ cm}^2$ ).

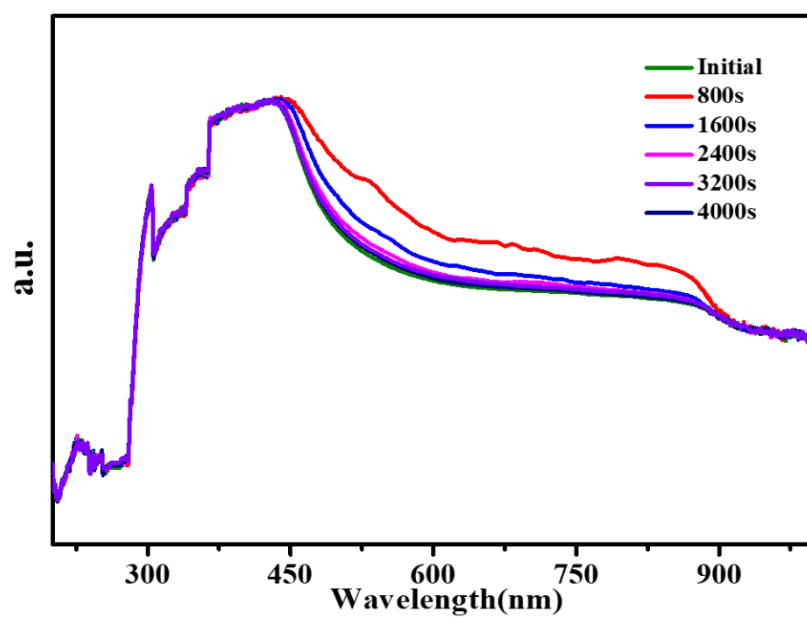

**Figure S8.** The in-situ UV-Vis spectroelectrochemistry of complex **1** in  $\text{CO}_2$  atmosphere.

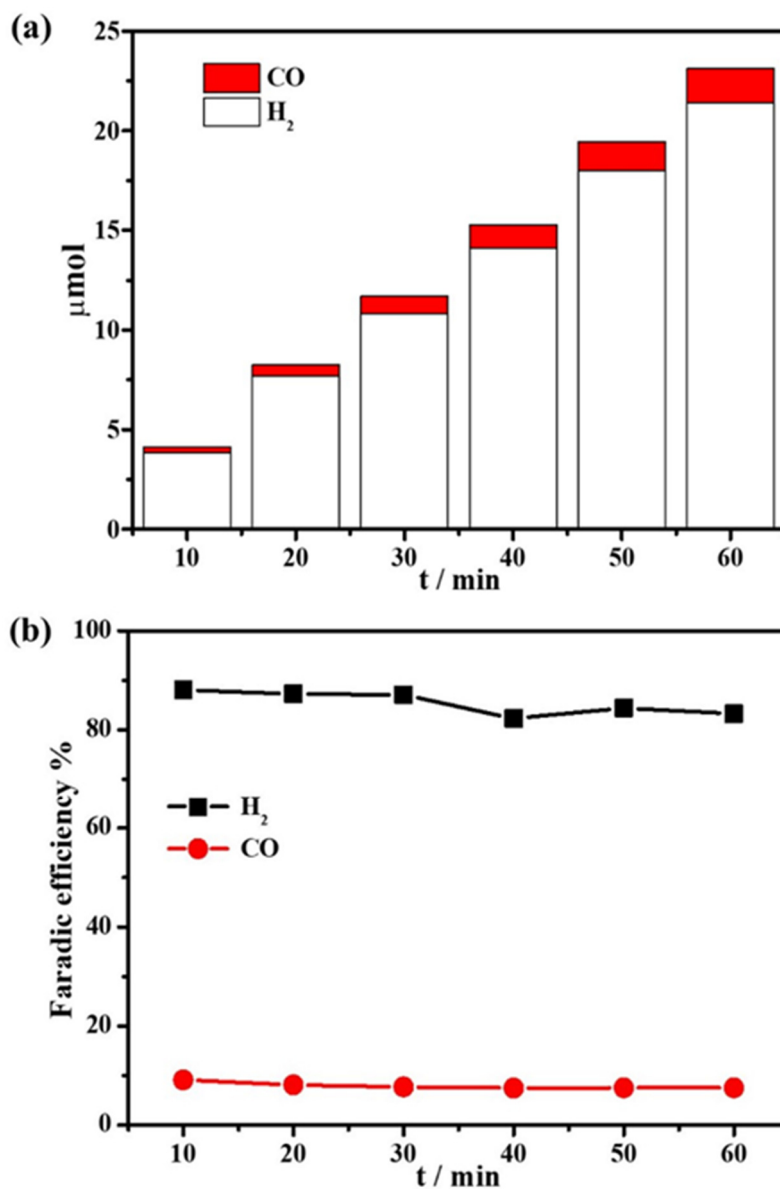

**Figure S9.** (a) The amount of material in the proton supply system that is combined with the electrocatalytic reduction  $\text{CO}_2$  product. (b) The Faraday efficiency curves of the electrocatalytic reduction products CO and  $\text{H}_2$  in the proton supply  $\text{H}_2\text{O}$  system. Based on the equations (S1) and (S2), the calculated TOF and TON values of the complex **1** for  $\text{CO}_2$  reduction are  $0.07 \text{ s}^{-1}$  and 280, respectively.

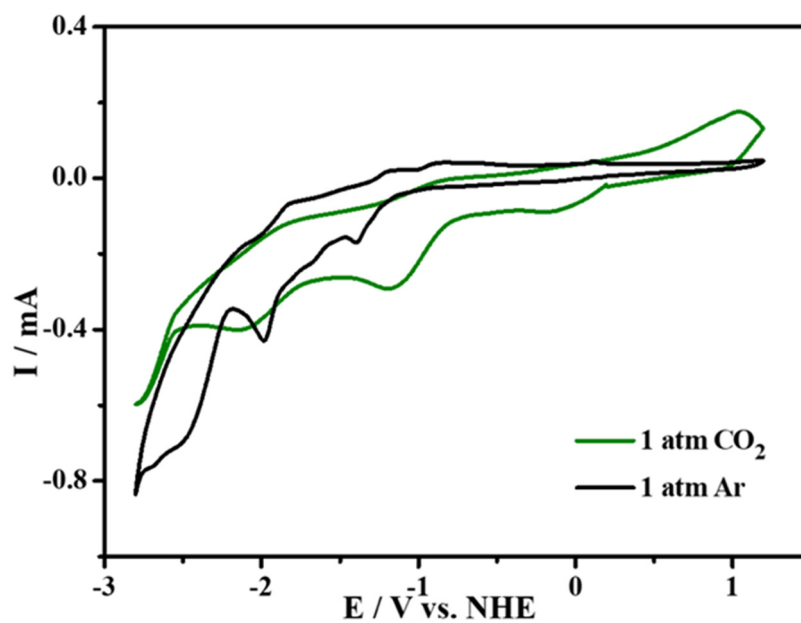

**Figure S10.** Cyclic voltammetry of complex **1** in the presence (green) and absence (black) of  $\text{CO}_2$  recorded at  $100 \text{ mV s}^{-1}$  at glassy carbon in a  $0.1 \text{ M tBu}_4\text{NPF}_6 \text{ CH}_3\text{CN}$  supporting electrolyte.

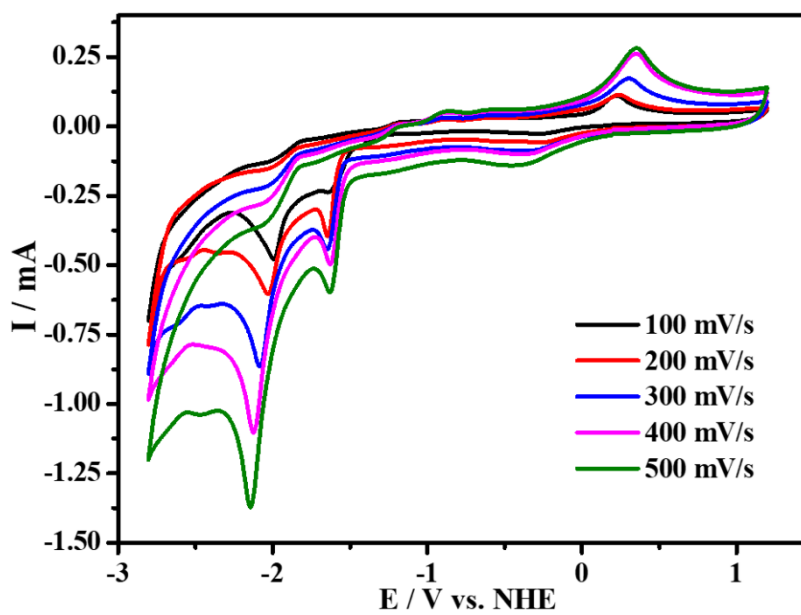

**Figure S11.** Cyclic voltammograms of complex **1** (2 mM) recorded in the presence of 0.58 mM TsOH·H<sub>2</sub>O under 1 atm Ar at scan rate range from 100 to 500 mV s<sup>-1</sup> in CH<sub>3</sub>CN (0.1 M <sup>n</sup>Bu<sub>4</sub>NBF<sub>6</sub>) at a glassy carbon electrode.

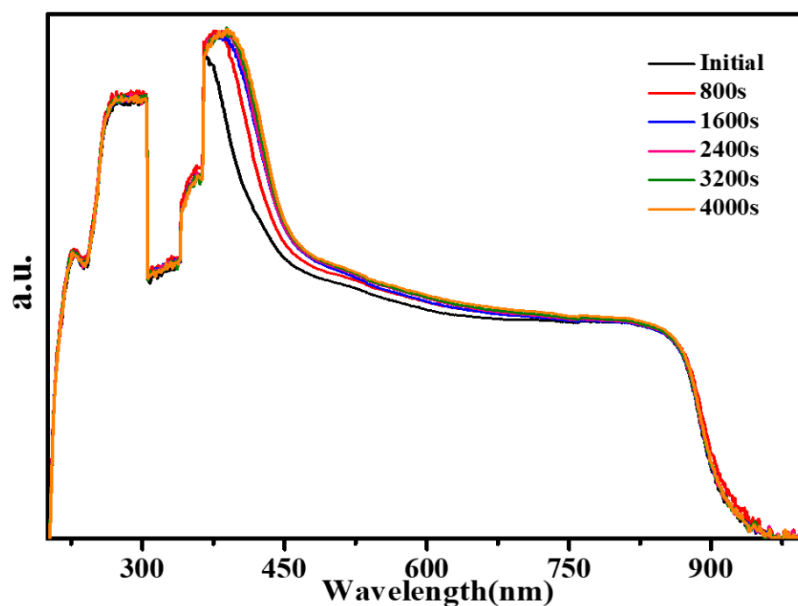

**Figure S12.** The *in-situ* UV-Vis spectroelectrochemistry of complex **1** in Ar atmosphere.

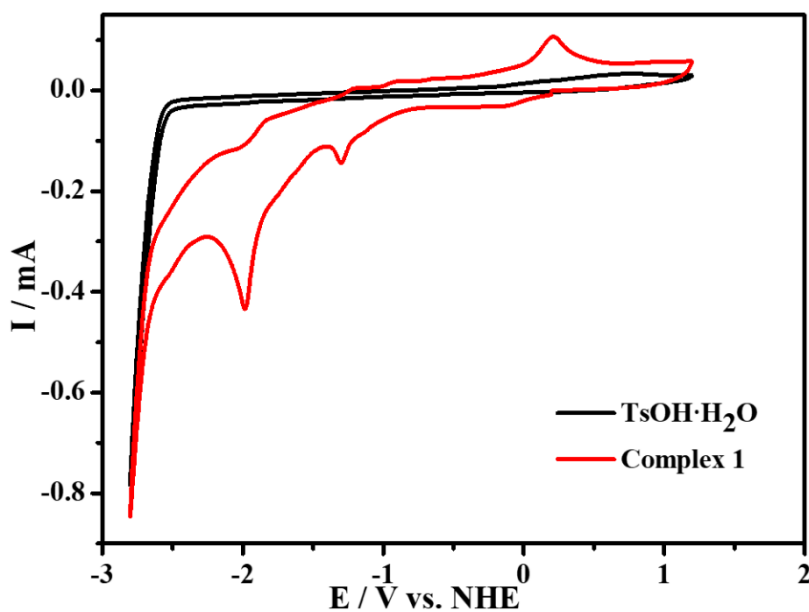

**Figure S13.** Cyclic voltammograms of complex **1** (2 mM, red trace) and in the presence of 10 mM TsOH·H<sub>2</sub>O (black trace) in CH<sub>3</sub>CN (0.1 M <sup>n</sup>Bu<sub>4</sub>NPF<sub>6</sub>) at a glassy carbon electrode and 100 mV s<sup>-1</sup>.

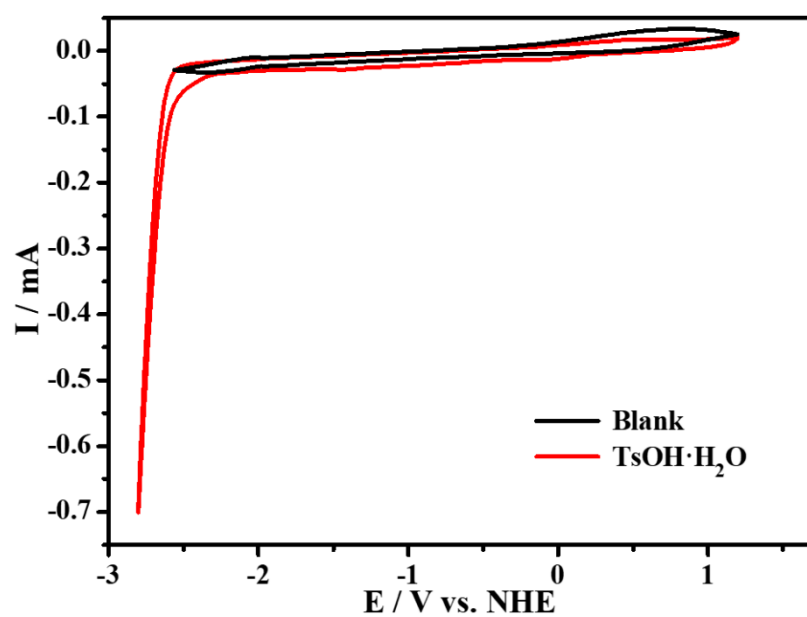

**Figure S14.** Cyclic voltammograms recorded in the absence (black trace) or in the presence of 10 mM of TsOH·H<sub>2</sub>O (red trace). Scan rate: 100 mV s<sup>-1</sup>. Working electrode: glassy carbon. Counter electrode: Pt wire. Reference electrode: Ag/AgCl.

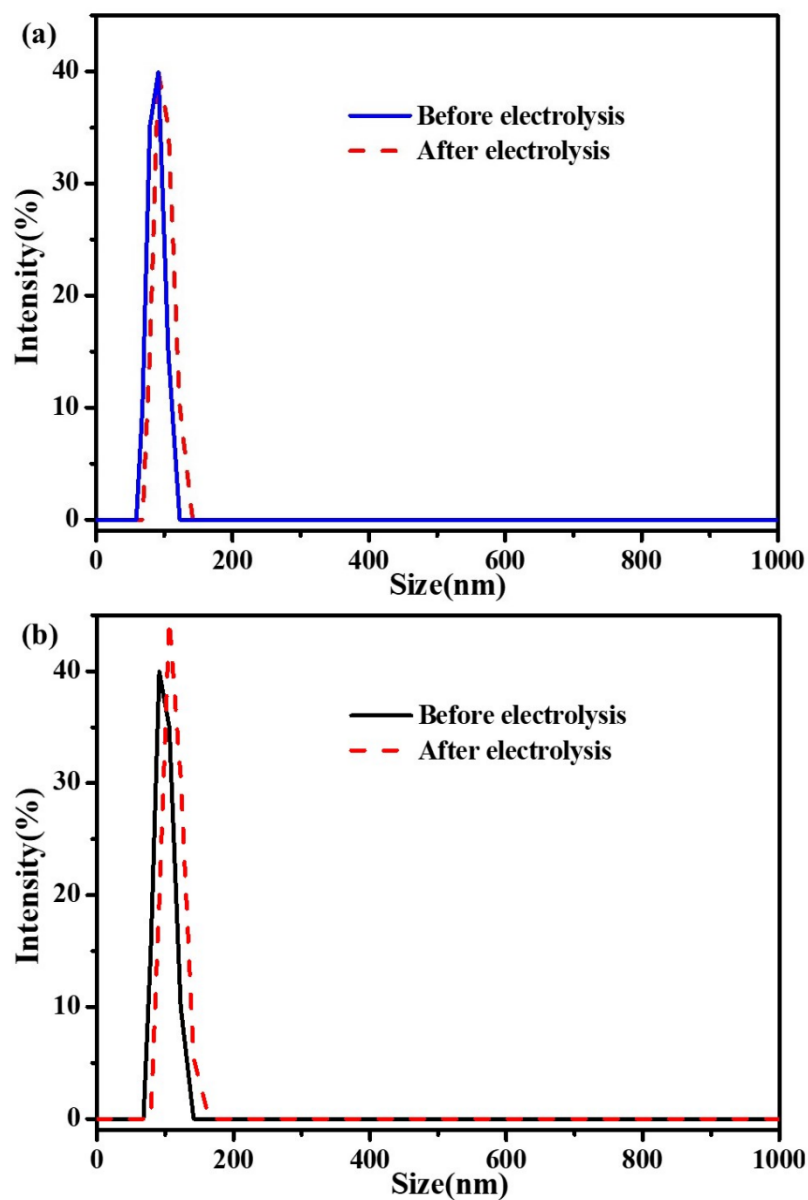

**Figure S15.** DLS spectra of the electrolyte before and after the CPE test. (a) DLS of the complex **1** containing 0.58mM TsOH·H<sub>2</sub>O in CH<sub>3</sub>CN (0.1 M <sup>n</sup>Bu<sub>4</sub>NPF<sub>6</sub>) before and after 4000 s electrolysis; (b) DLS of the complex **1** in CH<sub>3</sub>CN (0.1 M <sup>n</sup>Bu<sub>4</sub>NPF<sub>6</sub>) under 1atm CO<sub>2</sub> before and after 4000 s electrolysis.

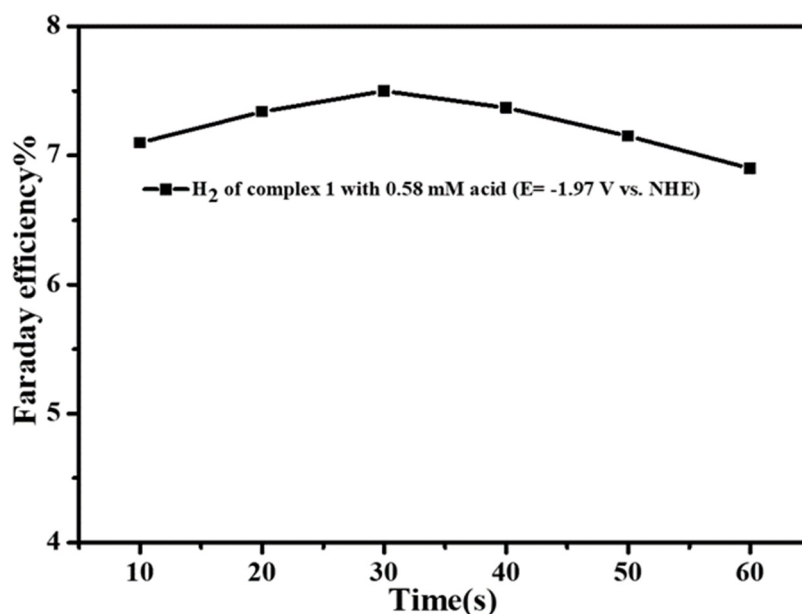

**Figure S16.** The Faraday efficiency curves of the electrocatalytic hydrogen evolution products  $H_2$  in the proton supply 0.58 mM TsOH· $H_2O$  system.

**Controlled Potential Electrolysis:** Controlled potential electrolysis takes place in GC-2014C. The FTO is used for the working electrode, the reference electrode is Ag/AgCl electrode containing saturated KCl solution, and the opposite electrode is platinum wire electrode. The working electrolytic contains a 2mM complex, a proton source required for the experiment, and an acetonitrile solution supporting the electrolyte (tetrabutylammonium hexafluorophosphate). The value of TON was calculated according to the electrolytic time of 4000 s.  $F$  is the Faraday constant ( $96485 \text{ C} \cdot \text{mol}^{-1}$ ).  $n$  is the number of transferred electrons ( $n=2$ ).

$$FE = \frac{ppm \cdot V(ml) \cdot n \cdot F}{22.4 \cdot Q} 100\% \quad (S1)$$

$$Q = it \quad (S2)$$

Based on the equations (S1) and (S2), we have calculated the TOF and TON values of the complex **1** for  $CO_2$  reduction, which are  $0.07 \text{ s}^{-1}$  and 280, respectively, as shown in the caption of Figure S9.

During hydrogen evolution test, after adding 0.58 mM of p-toluenesulfonic acid, FE of  $H_2$  is about 7.6% and TON = 78, as shown in Figure S16.



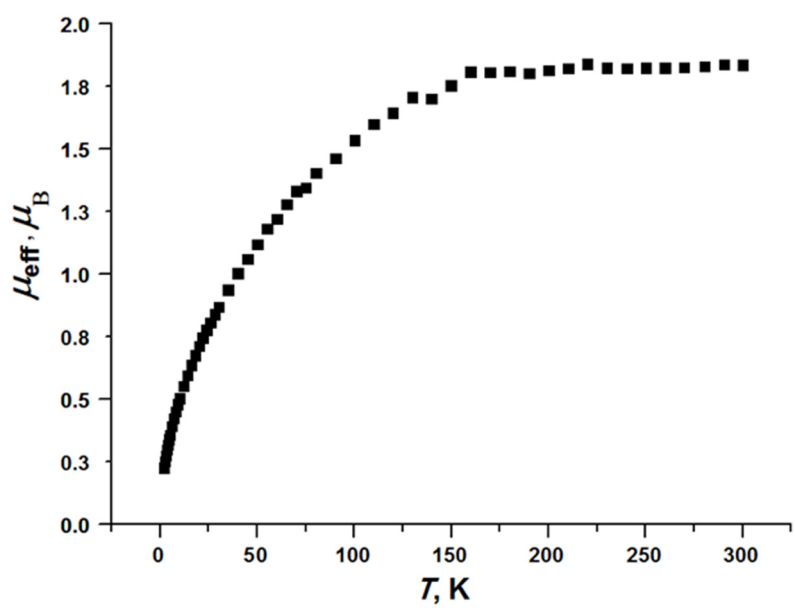

**Figure S17.** Plot of the magnetic moments ( $\mu_{\text{eff}}$ ) versus the temperature T for solid sample of complex **1**.

**Table S9.** The molecular geometry of complex **1** as predicted by SHAPE 2.1.

|                                                               |       |                                       |                       |
|---------------------------------------------------------------|-------|---------------------------------------|-----------------------|
| S H A P E v2.1                                                |       | Continuous Shape Measures calculation |                       |
| (c) 2013 Electronic Structure Group, Universitat de Barcelona |       |                                       |                       |
| vOC-2                                                         |       | 3 C2v                                 | Tetrvacant octahedron |
| L-2                                                           |       | 1                                     | Dinfh Linear          |
|                                                               |       |                                       |                       |
| Structure [ML2]                                               |       | vOC-2                                 | L-2                   |
| DOSDAQ                                                        | 1 Cu, | 52.336,                               | 92.312                |
| O                                                             | 1 O , | 11.761,                               | 22.868                |
| O                                                             | 0 O , | 27.345,                               | 29.899                |
| N                                                             | 4 N , | 36.365,                               | 74.167                |
| N                                                             | 9 N , | 0.410,                                | 27.040                |
