# Supplementary material for: Electrocatalytic CO2 Reduction and H2 Evolution by a Copper (II) Complex with Redox-Active Ligand
Source: Molecules. 2022 Feb 18;27(4):1399. doi: 10.3390/molecules27041399 (PMC8874443; doi:10.3390/molecules27041399)
Supplement: Supplementary file 1 [file molecules-27-01399-s001.zip › complex1cif+-+¦.cif]

data_mo_20180625-zghy-6_0m_sq_s
_audit_creation_date               2018-06-18
_audit_creation_method
;
Olex2 1.2
(compiled 2018.05.29 svn.r3508 for OlexSys, GUI svn.r5506)
;
_shelx_SHELXL_version_number       '2014/7'
_audit_contact_author_address      ?
_audit_contact_author_email        ?
_audit_contact_author_name         ''
_audit_contact_author_phone        ?
_publ_contact_author_id_orcid      ?
_publ_section_references
;
Dolomanov, O.V., Bourhis, L.J., Gildea, R.J, Howard, J.A.K. & Puschmann, H.
 (2009), J. Appl. Cryst. 42, 339-341.

Sheldrick, G.M. (2015). Acta Cryst. A71, 3-8.

Sheldrick, G.M. (2015). Acta Cryst. C71, 3-8.
;
_chemical_name_common              ?
_chemical_name_systematic          ?
_chemical_formula_moiety           'C26 H18 Cu N9 O9'
_chemical_formula_sum              'C26 H18 Cu N9 O9'
_chemical_formula_weight           664.03
_chemical_melting_point            ?
loop_
  _atom_type_symbol
  _atom_type_description
  _atom_type_scat_dispersion_real
  _atom_type_scat_dispersion_imag
  _atom_type_scat_source
 'C' 'C' 0.0033 0.0016 'International Tables Vol C Tables 4.2.6.8 and 6.1.1.4'
 'H' 'H' 0.0000 0.0000 'International Tables Vol C Tables 4.2.6.8 and 6.1.1.4'
 'Cu' 'Cu' 0.3201 1.2651 'International Tables Vol C Tables 4.2.6.8 and 6.1.1.4'
 'N' 'N' 0.0061 0.0033 'International Tables Vol C Tables 4.2.6.8 and 6.1.1.4'
 'O' 'O' 0.0106 0.0060 'International Tables Vol C Tables 4.2.6.8 and 6.1.1.4'

_shelx_space_group_comment
;
The symmetry employed for this shelxl refinement is uniquely defined
by the following loop, which should always be used as a source of
symmetry information in preference to the above space-group names.
They are only intended as comments.
;
_space_group_crystal_system        'monoclinic'
_space_group_IT_number             15
_space_group_name_H-M_alt          'C 1 2/c 1'
_space_group_name_Hall             '-C 2yc'
loop_
  _space_group_symop_operation_xyz
 'x, y, z'
 '-x, y, -z+1/2'
 'x+1/2, y+1/2, z'
 '-x+1/2, y+1/2, -z+1/2'
 '-x, -y, -z'
 'x, -y, z-1/2'
 '-x+1/2, -y+1/2, -z'
 'x+1/2, -y+1/2, z-1/2'

_cell_length_a                     27.32(2)
_cell_length_b                     13.544(13)
_cell_length_c                     21.773(19)
_cell_angle_alpha                  90
_cell_angle_beta                   121.34(2)
_cell_angle_gamma                  90
_cell_volume                       6881(11)
_cell_formula_units_Z              8
_cell_measurement_reflns_used      2420
_cell_measurement_temperature      173
_cell_measurement_theta_max        17.660
_cell_measurement_theta_min        2.276
_shelx_estimated_absorpt_T_max     0.947
_shelx_estimated_absorpt_T_min     0.880
_exptl_absorpt_coefficient_mu      0.693
_exptl_absorpt_correction_T_max    0.7455
_exptl_absorpt_correction_T_min    0.6580
_exptl_absorpt_correction_type     multi-scan
_exptl_absorpt_process_details    
 'SADABS-2014/5 (Bruker,2014/5) was used for absorption correction. wR2(int) was 0.0773 before and 0.0606 after correction. The Ratio of minimum to maximum transmission is 0.8826. The \l/2 correction factor is 0.00150.'
_exptl_absorpt_special_details     ?
_exptl_crystal_colour              blue
_exptl_crystal_colour_primary      blue
_exptl_crystal_density_diffrn      1.282
_exptl_crystal_density_meas        ?
_exptl_crystal_density_method      ?
_exptl_crystal_description         block
_exptl_crystal_F_000               2704
_exptl_crystal_size_max            0.19
_exptl_crystal_size_mid            0.12
_exptl_crystal_size_min            0.08
_exptl_transmission_factor_max     ?
_exptl_transmission_factor_min     ?
_diffrn_reflns_av_R_equivalents    0.0700
_diffrn_reflns_av_unetI/netI       0.0704
_diffrn_reflns_Laue_measured_fraction_full  0.989
_diffrn_reflns_Laue_measured_fraction_max  0.989
_diffrn_reflns_limit_h_max         33
_diffrn_reflns_limit_h_min         -32
_diffrn_reflns_limit_k_max         16
_diffrn_reflns_limit_k_min         -16
_diffrn_reflns_limit_l_max         24
_diffrn_reflns_limit_l_min         -26
_diffrn_reflns_number              24001
_diffrn_reflns_point_group_measured_fraction_full  0.989
_diffrn_reflns_point_group_measured_fraction_max  0.989
_diffrn_reflns_theta_full          25.242
_diffrn_reflns_theta_max           25.495
_diffrn_reflns_theta_min           1.738
_diffrn_ambient_temperature        173
_diffrn_detector_area_resol_mean   ?
_diffrn_measured_fraction_theta_full  0.989
_diffrn_measured_fraction_theta_max  0.989
_diffrn_measurement_device_type    'Bruker APEX-II CCD'
_diffrn_measurement_method         '\f and \w scans'
_diffrn_radiation_type             MoK\a
_diffrn_radiation_wavelength       0.71073
_diffrn_source                     ?
_diffrn_standards_number           0
_reflns_Friedel_coverage           0.000
_reflns_Friedel_fraction_full      .
_reflns_Friedel_fraction_max       .
_reflns_number_gt                  3448
_reflns_number_total               6343
_reflns_special_details
;
 Reflections were merged by SHELXL according to the crystal
 class for the calculation of statistics and refinement.
 
 Structure factors included contributions from the .fab file.
 
 _reflns_Friedel_fraction is defined as the number of unique
 Friedel pairs measured divided by the number that would be
 possible theoretically, ignoring centric projections and
 systematic absences.
;
_reflns_threshold_expression       'I > 2\s(I)'
_computing_cell_refinement         'SAINT v8.34A (Bruker, 2013)'
_computing_data_collection         ?
_computing_data_reduction          'SAINT v8.34A (Bruker, 2013)'
_computing_molecular_graphics      'Olex2 (Dolomanov et al., 2009)'
_computing_publication_material    'Olex2 (Dolomanov et al., 2009)'
_computing_structure_refinement    'ShelXL (Sheldrick, 2015)'
_computing_structure_solution      'ShelXT (Sheldrick, 2015)'
_refine_diff_density_max           0.951
_refine_diff_density_min           -0.555
_refine_diff_density_rms           0.090
_refine_ls_extinction_coef         .
_refine_ls_extinction_method       none
_refine_ls_goodness_of_fit_ref     1.040
_refine_ls_hydrogen_treatment      constr
_refine_ls_matrix_type             full
_refine_ls_number_parameters       408
_refine_ls_number_reflns           6343
_refine_ls_number_restraints       408
_refine_ls_R_factor_all            0.1447
_refine_ls_R_factor_gt             0.0908
_refine_ls_restrained_S_all        1.042
_refine_ls_shift/su_max            0.010
_refine_ls_shift/su_mean           0.000
_refine_ls_structure_factor_coef   Fsqd
_refine_ls_weighting_details      
 'w=1/[\s^2^(Fo^2^)+(0.1827P)^2^] where P=(Fo^2^+2Fc^2^)/3'
_refine_ls_weighting_scheme        calc
_refine_ls_wR_factor_gt            0.2737
_refine_ls_wR_factor_ref           0.3016
_refine_special_details            ?
_olex2_refinement_description
;
1. Fixed Uiso
 At 1.2 times of:
  All C(H) groups
 At 1.5 times of:
  All C(H,H,H) groups
2. Rigid body (RIGU) restrains
 All non-hydrogen atoms
 with sigma for 1-2 distances of 0.004 and sigma for 1-3 distances of 0.004
3.a Aromatic/amide H refined with riding coordinates:
 C3(H3), C4(H4), C5(H5), C10(H10), C11(H11), C13(H13), C15(H15), C18(H18),
 C19(H19), C22(H22), C23(H23), C24(H24)
3.b Idealised Me refined as rotating group:
 C1(H1A,H1B,H1C), C26(H26A,H26B,H26C)
;
_atom_sites_solution_hydrogens     geom
_atom_sites_solution_primary       dual
_atom_sites_solution_secondary     ?
loop_
  _atom_site_label
  _atom_site_type_symbol
  _atom_site_fract_x
  _atom_site_fract_y
  _atom_site_fract_z
  _atom_site_U_iso_or_equiv
  _atom_site_adp_type
  _atom_site_occupancy
  _atom_site_site_symmetry_order
  _atom_site_calc_flag
  _atom_site_refinement_flags_posn
  _atom_site_refinement_flags_adp
  _atom_site_refinement_flags_occupancy
  _atom_site_disorder_assembly
  _atom_site_disorder_group
 Cu1 Cu 0.63352(4) 0.55827(6) 0.59902(4) 0.0677(4) Uani 1 1 d . U . . .
 O1 O 0.6902(3) 0.1300(4) 0.6539(4) 0.126(2) Uani 1 1 d . U . . .
 O2 O 0.7684(3) 0.0815(3) 0.6598(3) 0.1001(18) Uani 1 1 d . U . . .
 O3 O 0.6039(3) 0.4292(4) 0.6205(3) 0.0969(16) Uani 1 1 d . U . . .
 O4 O 0.6265(3) 0.5209(6) 0.7100(4) 0.129(2) Uani 1 1 d . U . . .
 O5 O 0.5946(3) 0.3723(6) 0.7046(4) 0.141(3) Uani 1 1 d . U . . .
 O6 O 0.6905(3) 0.4534(5) 0.5104(3) 0.107(2) Uani 1 1 d . U . . .
 O7 O 0.6099(2) 0.8057(4) 0.5927(3) 0.1042(18) Uani 1 1 d . U . . .
 O8 O 0.3447(7) 0.8483(16) 0.4892(9) 0.350(11) Uani 1 1 d . U . . .
 O9 O 0.3747(6) 0.7819(15) 0.6017(9) 0.320(9) Uani 1 1 d . U . . .
 N1 N 0.7362(3) 0.1463(4) 0.6597(3) 0.0813(16) Uani 1 1 d . U . . .
 N2 N 0.7119(2) 0.5101(3) 0.6512(3) 0.0630(13) Uani 1 1 d . U . . .
 N3 N 0.8046(2) 0.5349(4) 0.6971(3) 0.0713(15) Uani 1 1 d . U . . .
 N4 N 0.6823(3) 0.6994(4) 0.6320(3) 0.0688(13) Uani 1 1 d . U . . .
 N5 N 0.5565(2) 0.6141(4) 0.5440(3) 0.0657(13) Uani 1 1 d . U . . .
 N6 N 0.6181(3) 0.5512(4) 0.4881(3) 0.0805(16) Uani 1 1 d . U . . .
 N7 N 0.4967(3) 0.7055(5) 0.4492(3) 0.0853(17) Uani 1 1 d . U . . .
 N8 N 0.3778(6) 0.7936(13) 0.5468(9) 0.211(6) Uani 1 1 d . U . . .
 N9 N 0.6104(3) 0.4454(5) 0.6801(4) 0.0783(16) Uani 1 1 d . U . . .
 C1 C 0.7302(5) 0.4092(9) 0.4918(6) 0.132(4) Uani 1 1 d . U . . .
 H1A H 0.7116 0.3531 0.4594 0.199 Uiso 1 1 calc GR . . . .
 H1B H 0.7647 0.3864 0.5357 0.199 Uiso 1 1 calc GR . . . .
 H1C H 0.7409 0.4586 0.4679 0.199 Uiso 1 1 calc GR . . . .
 C2 C 0.6467(4) 0.5093(6) 0.4620(4) 0.0838(19) Uani 1 1 d . U . . .
 C3 C 0.6321(4) 0.5244(8) 0.3901(5) 0.103(3) Uani 1 1 d . U . . .
 H3 H 0.6525 0.4914 0.3718 0.123 Uiso 1 1 calc R . . . .
 C4 C 0.5886(5) 0.5866(9) 0.3477(5) 0.116(3) Uani 1 1 d . U . . .
 H4 H 0.5808 0.6034 0.3010 0.140 Uiso 1 1 calc R . . . .
 C5 C 0.5561(4) 0.6246(8) 0.3730(5) 0.115(3) Uani 1 1 d . U . . .
 H5 H 0.5226 0.6620 0.3426 0.138 Uiso 1 1 calc R . . . .
 C6 C 0.5737(4) 0.6070(6) 0.4455(4) 0.0855(19) Uani 1 1 d . U . . .
 C7 C 0.5425(3) 0.6448(6) 0.4799(4) 0.0755(17) Uani 1 1 d . U . . .
 C8 C 0.4801(3) 0.7107(6) 0.4987(4) 0.0851(19) Uani 1 1 d . U . . .
 C9 C 0.5174(3) 0.6545(6) 0.5585(4) 0.0777(18) Uani 1 1 d . U . . .
 C10 C 0.5099(3) 0.6450(6) 0.6156(4) 0.085(2) Uani 1 1 d . U . . .
 H10 H 0.5359 0.6078 0.6569 0.102 Uiso 1 1 calc R . . . .
 C11 C 0.4621(4) 0.6924(7) 0.6110(5) 0.107(3) Uani 1 1 d . U . . .
 H11 H 0.4548 0.6845 0.6489 0.129 Uiso 1 1 calc R . . . .
 C12 C 0.4262(4) 0.7493(7) 0.5534(6) 0.111(3) Uani 1 1 d . U . . .
 C13 C 0.4321(4) 0.7593(7) 0.4960(5) 0.107(3) Uani 1 1 d . U . . .
 H13 H 0.4055 0.7969 0.4553 0.128 Uiso 1 1 calc R . . . .
 C14 C 0.7569(3) 0.2483(4) 0.6718(4) 0.0689(16) Uani 1 1 d . U . . .
 C15 C 0.7178(3) 0.3220(4) 0.6535(4) 0.0684(17) Uani 1 1 d . U . . .
 H15 H 0.6782 0.3091 0.6343 0.082 Uiso 1 1 calc R . . . .
 C16 C 0.7398(3) 0.4177(4) 0.6649(4) 0.0594(15) Uani 1 1 d . U . . .
 C17 C 0.7976(3) 0.4334(4) 0.6944(4) 0.0654(16) Uani 1 1 d . U . . .
 C18 C 0.8363(3) 0.3575(5) 0.7134(4) 0.0727(17) Uani 1 1 d . U . . .
 H18 H 0.8761 0.3695 0.7344 0.087 Uiso 1 1 calc R . . . .
 C19 C 0.8139(3) 0.2608(5) 0.7002(4) 0.0702(16) Uani 1 1 d . U . . .
 H19 H 0.8383 0.2053 0.7111 0.084 Uiso 1 1 calc R . . . .
 C20 C 0.7521(3) 0.5761(4) 0.6711(4) 0.0607(15) Uani 1 1 d . U . . .
 C21 C 0.7387(3) 0.6808(4) 0.6623(3) 0.0607(15) Uani 1 1 d . U . . .
 C22 C 0.7802(3) 0.7536(5) 0.6872(4) 0.0759(18) Uani 1 1 d . U . . .
 H22 H 0.8199 0.7380 0.7115 0.091 Uiso 1 1 calc R . . . .
 C23 C 0.7610(3) 0.8510(5) 0.6748(4) 0.0716(17) Uani 1 1 d . U . . .
 H23 H 0.7878 0.9036 0.6892 0.086 Uiso 1 1 calc R . . . .
 C24 C 0.7042(3) 0.8712(5) 0.6422(4) 0.0760(18) Uani 1 1 d . U . . .
 H24 H 0.6913 0.9377 0.6334 0.091 Uiso 1 1 calc R . . . .
 C25 C 0.6656(3) 0.7957(5) 0.6220(4) 0.0760(18) Uani 1 1 d . U . . .
 C26 C 0.5874(4) 0.9045(6) 0.5857(6) 0.121(3) Uani 1 1 d . U . . .
 H26A H 0.5957 0.9435 0.5542 0.182 Uiso 1 1 calc GR . . . .
 H26B H 0.6055 0.9356 0.6332 0.182 Uiso 1 1 calc GR . . . .
 H26C H 0.5459 0.9012 0.5649 0.182 Uiso 1 1 calc GR . . . .

loop_
  _atom_site_aniso_label
  _atom_site_aniso_U_11
  _atom_site_aniso_U_22
  _atom_site_aniso_U_33
  _atom_site_aniso_U_23
  _atom_site_aniso_U_13
  _atom_site_aniso_U_12
 Cu1 0.0698(6) 0.0629(5) 0.0774(6) 0.0028(4) 0.0431(5) 0.0056(4)
 O1 0.131(5) 0.075(4) 0.200(7) -0.022(4) 0.106(5) -0.019(3)
 O2 0.124(5) 0.052(3) 0.126(5) 0.008(3) 0.067(4) 0.019(3)
 O3 0.091(4) 0.114(4) 0.100(4) -0.013(3) 0.060(3) -0.013(3)
 O4 0.080(4) 0.118(4) 0.136(5) -0.032(4) 0.020(4) 0.020(3)
 O5 0.131(6) 0.165(6) 0.147(6) 0.053(5) 0.087(5) 0.009(4)
 O6 0.125(5) 0.135(5) 0.087(4) 0.008(3) 0.072(4) 0.041(4)
 O7 0.083(3) 0.064(3) 0.147(5) 0.013(3) 0.047(3) 0.013(2)
 O8 0.284(16) 0.53(2) 0.249(12) 0.102(14) 0.146(11) 0.265(18)
 O9 0.275(15) 0.51(2) 0.258(12) 0.001(13) 0.193(12) 0.122(15)
 N1 0.102(4) 0.049(3) 0.105(5) -0.002(3) 0.062(4) 0.000(3)
 N2 0.070(3) 0.048(2) 0.081(3) -0.003(2) 0.046(3) -0.002(2)
 N3 0.070(3) 0.054(3) 0.096(4) -0.017(2) 0.047(3) -0.008(2)
 N4 0.079(3) 0.050(3) 0.078(4) -0.005(2) 0.041(3) 0.001(2)
 N5 0.065(3) 0.075(3) 0.057(3) 0.002(2) 0.031(3) 0.010(2)
 N6 0.087(4) 0.087(4) 0.075(3) 0.001(3) 0.046(3) 0.005(3)
 N7 0.068(4) 0.098(4) 0.079(4) 0.004(3) 0.031(3) 0.002(3)
 N8 0.149(8) 0.296(14) 0.185(10) -0.027(9) 0.085(8) 0.073(9)
 N9 0.066(4) 0.102(4) 0.075(4) 0.016(3) 0.043(3) 0.011(3)
 C1 0.141(8) 0.158(9) 0.138(9) -0.004(7) 0.101(8) 0.037(7)
 C2 0.095(5) 0.100(5) 0.071(4) -0.019(3) 0.054(4) -0.009(4)
 C3 0.105(6) 0.144(7) 0.077(4) -0.007(4) 0.060(4) 0.002(5)
 C4 0.107(6) 0.170(8) 0.080(5) 0.005(5) 0.054(5) -0.005(5)
 C5 0.094(6) 0.170(9) 0.068(4) 0.017(5) 0.033(4) 0.016(6)
 C6 0.088(5) 0.101(5) 0.072(4) -0.004(3) 0.045(4) -0.003(4)
 C7 0.068(4) 0.087(4) 0.065(4) 0.002(3) 0.031(3) 0.004(3)
 C8 0.067(4) 0.084(4) 0.088(4) -0.004(3) 0.029(4) 0.012(3)
 C9 0.064(4) 0.090(4) 0.073(4) -0.018(3) 0.032(3) 0.001(3)
 C10 0.078(5) 0.097(5) 0.082(5) -0.003(4) 0.043(4) 0.022(4)
 C11 0.090(5) 0.130(7) 0.102(6) -0.008(5) 0.050(5) 0.028(5)
 C12 0.075(5) 0.128(7) 0.111(6) -0.023(5) 0.035(5) 0.024(4)
 C13 0.079(5) 0.112(6) 0.105(6) -0.013(5) 0.031(4) 0.018(4)
 C14 0.092(4) 0.042(3) 0.075(4) -0.001(2) 0.045(4) 0.005(3)
 C15 0.083(4) 0.047(3) 0.087(5) -0.006(3) 0.052(4) 0.001(3)
 C16 0.071(3) 0.041(3) 0.074(4) -0.007(2) 0.043(3) 0.000(2)
 C17 0.070(4) 0.054(3) 0.077(4) -0.009(3) 0.042(3) -0.001(2)
 C18 0.066(4) 0.069(3) 0.079(4) -0.009(3) 0.035(3) 0.004(3)
 C19 0.082(4) 0.062(3) 0.074(4) 0.000(3) 0.046(4) 0.008(3)
 C20 0.069(3) 0.045(3) 0.078(4) -0.012(2) 0.045(3) -0.004(2)
 C21 0.070(3) 0.050(3) 0.061(4) -0.011(2) 0.033(3) -0.007(2)
 C22 0.087(4) 0.054(3) 0.085(5) -0.013(3) 0.045(4) -0.007(3)
 C23 0.081(4) 0.051(3) 0.078(4) -0.009(3) 0.039(4) -0.010(3)
 C24 0.095(4) 0.053(3) 0.074(4) 0.001(3) 0.040(4) -0.004(3)
 C25 0.082(4) 0.060(3) 0.078(4) -0.003(3) 0.036(4) 0.000(3)
 C26 0.101(6) 0.065(4) 0.151(9) -0.005(5) 0.033(6) 0.020(4)

_geom_special_details
;
 All esds (except the esd in the dihedral angle between two l.s. planes)
 are estimated using the full covariance matrix.  The cell esds are taken
 into account individually in the estimation of esds in distances, angles
 and torsion angles; correlations between esds in cell parameters are only
 used when they are defined by crystal symmetry.  An approximate (isotropic)
 treatment of cell esds is used for estimating esds involving l.s. planes.
;
loop_
  _geom_bond_atom_site_label_1
  _geom_bond_atom_site_label_2
  _geom_bond_distance
  _geom_bond_site_symmetry_2
  _geom_bond_publ_flag
 Cu1 O3 2.079(6) . ?
 Cu1 N2 1.941(5) . ?
 Cu1 N4 2.225(5) . ?
 Cu1 N5 1.952(6) . ?
 Cu1 N6 2.228(6) . ?
 O1 N1 1.216(8) . ?
 O2 N1 1.241(8) . ?
 O3 N9 1.235(8) . ?
 O4 N9 1.168(8) . ?
 O5 N9 1.300(9) . ?
 O6 C1 1.469(10) . ?
 O6 C2 1.342(10) . ?
 O7 C25 1.316(9) . ?
 O7 C26 1.446(9) . ?
 O8 N8 1.327(19) . ?
 O9 N8 1.250(17) . ?
 N1 C14 1.464(8) . ?
 N2 C16 1.414(8) . ?
 N2 C20 1.305(8) . ?
 N3 C17 1.384(8) . ?
 N3 C20 1.357(8) . ?
 N4 C21 1.347(8) . ?
 N4 C25 1.362(8) . ?
 N5 C7 1.308(9) . ?
 N5 C9 1.376(9) . ?
 N6 C2 1.309(9) . ?
 N6 C6 1.317(10) . ?
 N7 C7 1.347(9) . ?
 N7 C8 1.373(10) . ?
 N8 C12 1.390(14) . ?
 C1 H1A 0.9800 . ?
 C1 H1B 0.9800 . ?
 C1 H1C 0.9800 . ?
 C2 C3 1.415(11) . ?
 C3 H3 0.9500 . ?
 C3 C4 1.354(13) . ?
 C4 H4 0.9500 . ?
 C4 C5 1.365(13) . ?
 C5 H5 0.9500 . ?
 C5 C6 1.412(11) . ?
 C6 C7 1.487(11) . ?
 C8 C9 1.390(11) . ?
 C8 C13 1.442(11) . ?
 C9 C10 1.368(10) . ?
 C10 H10 0.9500 . ?
 C10 C11 1.411(10) . ?
 C11 H11 0.9500 . ?
 C11 C12 1.360(13) . ?
 C12 C13 1.346(13) . ?
 C13 H13 0.9500 . ?
 C14 C15 1.361(9) . ?
 C14 C19 1.354(10) . ?
 C15 H15 0.9500 . ?
 C15 C16 1.397(8) . ?
 C16 C17 1.377(9) . ?
 C17 C18 1.375(9) . ?
 C18 H18 0.9500 . ?
 C18 C19 1.411(9) . ?
 C19 H19 0.9500 . ?
 C20 C21 1.452(8) . ?
 C21 C22 1.383(9) . ?
 C22 H22 0.9500 . ?
 C22 C23 1.394(9) . ?
 C23 H23 0.9500 . ?
 C23 C24 1.356(10) . ?
 C24 H24 0.9500 . ?
 C24 C25 1.367(10) . ?
 C26 H26A 0.9800 . ?
 C26 H26B 0.9800 . ?
 C26 H26C 0.9800 . ?

loop_
  _geom_angle_atom_site_label_1
  _geom_angle_atom_site_label_2
  _geom_angle_atom_site_label_3
  _geom_angle
  _geom_angle_site_symmetry_1
  _geom_angle_site_symmetry_3
  _geom_angle_publ_flag
 O3 Cu1 N4 152.6(2) . . ?
 O3 Cu1 N6 109.4(2) . . ?
 N2 Cu1 O3 91.4(2) . . ?
 N2 Cu1 N4 78.8(2) . . ?
 N2 Cu1 N5 176.0(2) . . ?
 N2 Cu1 N6 98.6(2) . . ?
 N4 Cu1 N6 97.5(2) . . ?
 N5 Cu1 O3 92.5(2) . . ?
 N5 Cu1 N4 98.0(2) . . ?
 N5 Cu1 N6 79.4(2) . . ?
 N9 O3 Cu1 103.1(5) . . ?
 C2 O6 C1 119.9(7) . . ?
 C25 O7 C26 117.9(6) . . ?
 O1 N1 O2 124.4(6) . . ?
 O1 N1 C14 118.1(6) . . ?
 O2 N1 C14 117.4(7) . . ?
 C16 N2 Cu1 137.0(4) . . ?
 C20 N2 Cu1 116.5(4) . . ?
 C20 N2 C16 105.4(5) . . ?
 C20 N3 C17 107.4(5) . . ?
 C21 N4 Cu1 109.8(4) . . ?
 C21 N4 C25 117.4(6) . . ?
 C25 N4 Cu1 132.6(5) . . ?
 C7 N5 Cu1 113.8(5) . . ?
 C7 N5 C9 106.6(6) . . ?
 C9 N5 Cu1 137.0(5) . . ?
 C2 N6 Cu1 132.0(6) . . ?
 C2 N6 C6 118.9(7) . . ?
 C6 N6 Cu1 108.8(5) . . ?
 C7 N7 C8 104.0(6) . . ?
 O8 N8 C12 118.9(15) . . ?
 O9 N8 O8 128.5(14) . . ?
 O9 N8 C12 112.3(15) . . ?
 O3 N9 O5 113.5(8) . . ?
 O4 N9 O3 123.2(7) . . ?
 O4 N9 O5 123.3(8) . . ?
 O6 C1 H1A 109.5 . . ?
 O6 C1 H1B 109.5 . . ?
 O6 C1 H1C 109.5 . . ?
 H1A C1 H1B 109.5 . . ?
 H1A C1 H1C 109.5 . . ?
 H1B C1 H1C 109.5 . . ?
 O6 C2 C3 125.0(7) . . ?
 N6 C2 O6 113.1(7) . . ?
 N6 C2 C3 121.9(9) . . ?
 C2 C3 H3 120.4 . . ?
 C4 C3 C2 119.2(8) . . ?
 C4 C3 H3 120.4 . . ?
 C3 C4 H4 120.6 . . ?
 C3 C4 C5 118.9(9) . . ?
 C5 C4 H4 120.6 . . ?
 C4 C5 H5 120.8 . . ?
 C4 C5 C6 118.3(9) . . ?
 C6 C5 H5 120.8 . . ?
 N6 C6 C5 122.4(8) . . ?
 N6 C6 C7 113.9(7) . . ?
 C5 C6 C7 123.7(8) . . ?
 N5 C7 N7 113.9(6) . . ?
 N5 C7 C6 120.0(7) . . ?
 N7 C7 C6 125.9(7) . . ?
 N7 C8 C9 109.1(6) . . ?
 N7 C8 C13 131.1(8) . . ?
 C9 C8 C13 119.8(8) . . ?
 N5 C9 C8 106.4(7) . . ?
 C10 C9 N5 132.3(7) . . ?
 C10 C9 C8 121.3(7) . . ?
 C9 C10 H10 121.2 . . ?
 C9 C10 C11 117.6(8) . . ?
 C11 C10 H10 121.2 . . ?
 C10 C11 H11 119.4 . . ?
 C12 C11 C10 121.3(9) . . ?
 C12 C11 H11 119.4 . . ?
 C11 C12 N8 122.0(12) . . ?
 C13 C12 N8 115.2(11) . . ?
 C13 C12 C11 122.5(8) . . ?
 C8 C13 H13 121.3 . . ?
 C12 C13 C8 117.5(9) . . ?
 C12 C13 H13 121.3 . . ?
 C15 C14 N1 117.9(7) . . ?
 C19 C14 N1 116.3(6) . . ?
 C19 C14 C15 125.7(6) . . ?
 C14 C15 H15 122.3 . . ?
 C14 C15 C16 115.3(6) . . ?
 C16 C15 H15 122.3 . . ?
 C15 C16 N2 130.4(6) . . ?
 C17 C16 N2 108.9(5) . . ?
 C17 C16 C15 120.7(6) . . ?
 C16 C17 N3 105.8(5) . . ?
 C18 C17 N3 131.5(6) . . ?
 C18 C17 C16 122.7(6) . . ?
 C17 C18 H18 121.7 . . ?
 C17 C18 C19 116.6(7) . . ?
 C19 C18 H18 121.7 . . ?
 C14 C19 C18 118.9(6) . . ?
 C14 C19 H19 120.6 . . ?
 C18 C19 H19 120.6 . . ?
 N2 C20 N3 112.4(5) . . ?
 N2 C20 C21 120.9(6) . . ?
 N3 C20 C21 126.6(6) . . ?
 N4 C21 C20 113.1(5) . . ?
 N4 C21 C22 123.7(6) . . ?
 C22 C21 C20 123.1(6) . . ?
 C21 C22 H22 121.6 . . ?
 C21 C22 C23 116.7(7) . . ?
 C23 C22 H22 121.6 . . ?
 C22 C23 H23 119.8 . . ?
 C24 C23 C22 120.4(6) . . ?
 C24 C23 H23 119.8 . . ?
 C23 C24 H24 120.1 . . ?
 C23 C24 C25 119.9(7) . . ?
 C25 C24 H24 120.1 . . ?
 O7 C25 N4 112.6(6) . . ?
 O7 C25 C24 125.6(7) . . ?
 N4 C25 C24 121.8(7) . . ?
 O7 C26 H26A 109.5 . . ?
 O7 C26 H26B 109.5 . . ?
 O7 C26 H26C 109.5 . . ?
 H26A C26 H26B 109.5 . . ?
 H26A C26 H26C 109.5 . . ?
 H26B C26 H26C 109.5 . . ?

_shelx_fab_file
;
 2 0 0 232.16 6.39
 -2 0 0 232.16 -6.39
 2 0 0 232.16 6.39
 -2 0 0 232.16 -6.39
 4 0 0 32.54 4.02
 4 0 0 32.54 4.02
 -4 0 0 32.54 -4.02
 4 0 0 32.54 4.02
 6 0 0 -51.22 21.23
 6 0 0 -51.22 21.23
 8 0 0 -13.45 10.79
 8 0 0 -13.45 10.79
 12 0 0 22.88 -1.24
 12 0 0 22.88 -1.24
 14 0 0 5.91 1.34
 14 0 0 5.91 1.34
 16 0 0 -5.22 -0.63
 16 0 0 -5.22 -0.63
 18 0 0 -7.21 -2.10
 18 0 0 -7.21 -2.10
 20 0 0 0.30 0.42
 22 0 0 -4.32 1.76
 24 0 0 -1.54 3.92
 26 0 0 4.23 3.55
 28 0 0 1.46 -0.52
 1 -1 0 -265.66 10.81
 -1 1 0 -265.66 -10.81
 -1 1 0 -265.66 -10.81
 1 1 0 -267.00 -2.04
 -1 1 0 -265.66 -10.81
 -3 -1 0 -15.25 17.11
 3 -1 0 -16.16 -14.07
 3 -1 0 -16.16 -14.07
 3 1 0 -15.25 -17.11
 3 1 0 -15.25 -17.11
 -3 1 0 -16.16 14.07
 -3 1 0 -16.16 14.07
 5 -1 0 48.03 -14.96
 5 -1 0 48.03 -14.96
 5 1 0 47.94 -12.32
 7 -1 0 21.90 -15.96
 7 -1 0 21.90 -15.96
 7 1 0 23.84 -22.03
 9 -1 0 -6.16 -0.88
 11 -1 0 -14.47 -1.97
 11 1 0 -14.79 -0.91
 11 1 0 -14.79 -0.91
 13 -1 0 -1.85 -2.17
 13 -1 0 -1.85 -2.17
 13 1 0 -1.07 -0.86
 13 1 0 -1.07 -0.86
 15 -1 0 0.44 -3.66
 15 1 0 0.05 -2.33
 15 1 0 0.05 -2.33
 17 -1 0 5.54 4.90
 17 1 0 5.67 -5.79
 19 -1 0 -0.10 2.92
 19 1 0 -0.58 -0.11
 19 1 0 -0.58 -0.11
 21 -1 0 1.57 2.14
 21 1 0 2.35 0.06
 21 1 0 2.35 0.06
 23 -1 0 3.79 -1.49
 23 1 0 3.62 -0.40
 23 1 0 3.62 -0.40
 25 -1 0 1.89 -3.67
 25 1 0 0.65 -0.76
 27 -1 0 -1.42 -0.81
 27 1 0 -2.09 -0.45
 29 -1 0 3.22 -0.69
 0 -2 0 -4.30 -6.14
 0 -2 0 -4.30 -6.14
 0 2 0 -4.30 6.14
 0 2 0 -4.30 6.14
 2 -2 0 54.61 -8.47
 -2 -2 0 56.77 17.11
 -2 -2 0 56.77 17.11
 2 -2 0 54.61 -8.47
 -2 2 0 54.61 8.47
 -2 2 0 54.61 8.47
 4 -2 0 -32.83 9.16
 -4 -2 0 -32.06 -5.05
 4 -2 0 -32.83 9.16
 4 2 0 -32.06 5.05
 4 2 0 -32.06 5.05
 -6 -2 0 24.56 -4.63
 6 -2 0 25.68 4.31
 6 -2 0 25.68 4.31
 6 2 0 24.56 4.63
 6 2 0 24.56 4.63
 8 -2 0 29.60 -5.61
 8 -2 0 29.60 -5.61
 10 -2 0 10.10 -5.88
 10 2 0 9.92 -1.05
 10 2 0 9.92 -1.05
 12 -2 0 2.54 2.20
 12 -2 0 2.54 2.20
 12 2 0 2.49 -1.15
 14 -2 0 2.92 -1.37
 14 -2 0 2.92 -1.37
 14 2 0 2.46 2.42
 16 -2 0 8.03 1.05
 16 -2 0 8.03 1.05
 16 2 0 7.44 2.08
 18 -2 0 9.04 2.42
 18 2 0 8.38 2.30
 20 -2 0 4.64 -0.89
 20 2 0 3.81 -4.35
 20 2 0 3.81 -4.35
 22 -2 0 1.22 -0.96
 22 2 0 0.57 -2.61
 22 2 0 0.57 -2.61
 24 -2 0 -0.96 2.08
 24 2 0 -1.30 -4.78
 24 2 0 -1.30 -4.78
 26 -2 0 -1.48 0.15
 -26 -2 0 -1.72 4.26
 26 2 0 -1.72 -4.26
 28 -2 0 -4.10 1.49
 30 -2 0 -2.51 0.63
 -1 -3 0 50.93 -3.21
 1 -3 0 52.23 15.50
 1 -3 0 52.23 15.50
 -1 3 0 52.23 -15.50
 -1 3 0 52.23 -15.50
 3 -3 0 -8.96 27.27
 -3 -3 0 -11.52 -28.57
 3 -3 0 -8.96 27.27
 3 3 0 -11.52 28.57
 -3 3 0 -8.96 -27.27
 -3 3 0 -8.96 -27.27
 -5 -3 0 -22.78 8.75
 5 -3 0 -24.74 -8.19
 5 -3 0 -24.74 -8.19
 5 3 0 -22.78 -8.75
 -5 3 0 -24.74 8.19
 -7 -3 0 -34.01 -8.03
 7 -3 0 -32.51 9.01
 7 -3 0 -32.51 9.01
 7 3 0 -34.01 8.03
 9 -3 0 0.40 4.81
 -11 -3 0 12.24 -2.46
 11 -3 0 11.91 -3.01
 11 -3 0 11.91 -3.01
 11 3 0 12.24 2.46
 11 3 0 12.24 2.46
 13 -3 0 -1.99 -5.63
 -13 -3 0 -2.15 -6.02
 13 -3 0 -1.99 -5.63
 13 3 0 -2.15 6.02
 13 3 0 -2.15 6.02
 -15 -3 0 -10.56 -3.63
 15 -3 0 -9.35 1.90
 15 -3 0 -9.35 1.90
 15 3 0 -10.56 3.63
 15 3 0 -10.56 3.63
 17 -3 0 -12.39 -11.83
 -17 -3 0 -12.34 -7.70
 17 -3 0 -12.39 -11.83
 17 3 0 -12.34 7.70
 17 3 0 -12.34 7.70
 19 -3 0 -5.45 -4.23
 19 -3 0 -5.45 -4.23
 -19 -3 0 -5.29 -1.37
 19 3 0 -5.29 1.37
 19 3 0 -5.29 1.37
 21 -3 0 -0.82 3.47
 -21 -3 0 -0.31 -1.85
 21 3 0 -0.31 1.85
 21 3 0 -0.31 1.85
 -23 -3 0 -0.34 -0.69
 23 -3 0 -1.23 6.06
 23 3 0 -0.34 0.69
 23 3 0 -0.34 0.69
 25 -3 0 -1.52 7.48
 -25 -3 0 1.01 -8.90
 25 3 0 1.01 8.90
 27 -3 0 5.19 4.64
 27 3 0 5.68 1.91
 29 -3 0 2.45 0.78
 29 3 0 2.06 -0.21
 0 -4 0 -72.86 0.81
 0 -4 0 -72.86 0.81
 0 4 0 -72.86 -0.81
 0 4 0 -72.86 -0.81
 2 -4 0 -67.25 -16.74
 -2 -4 0 -64.20 14.58
 2 -4 0 -67.25 -16.74
 -2 4 0 -67.25 16.74
 -2 4 0 -67.25 16.74
 4 -4 0 24.52 1.18
 -4 -4 0 25.02 4.89
 4 -4 0 24.52 1.18
 -4 4 0 24.52 -1.18
 -6 -4 0 24.32 -6.08
 6 -4 0 23.59 6.25
 -6 4 0 23.59 -6.25
 8 -4 0 -4.05 -13.67
 8 -4 0 -4.05 -13.67
 -8 -4 0 -3.20 5.63
 -8 4 0 -4.05 13.67
 8 4 0 -3.20 -5.63
 10 -4 0 -26.97 -1.62
 -10 -4 0 -27.62 -2.75
 10 -4 0 -26.97 -1.62
 10 4 0 -27.62 2.75
 10 4 0 -27.62 2.75
 -12 -4 0 -18.60 3.86
 12 -4 0 -19.04 6.07
 12 -4 0 -19.04 6.07
 12 4 0 -18.60 -3.86
 12 4 0 -18.60 -3.86
 -14 -4 0 5.85 2.69
 14 -4 0 4.69 4.48
 14 -4 0 4.69 4.48
 14 4 0 5.85 -2.69
 14 4 0 5.85 -2.69
 16 -4 0 4.89 4.51
 16 -4 0 4.89 4.51
 -16 -4 0 5.54 4.46
 16 4 0 5.54 -4.46
 16 4 0 5.54 -4.46
 -18 -4 0 -0.69 3.69
 18 -4 0 -0.14 10.08
 18 -4 0 -0.14 10.08
 18 4 0 -0.69 -3.69
 18 4 0 -0.69 -3.69
 20 -4 0 -6.28 -3.77
 -20 -4 0 -5.18 -2.65
 20 -4 0 -6.28 -3.77
 20 4 0 -5.18 2.65
 22 -4 0 -5.12 -8.49
 22 -4 0 -5.12 -8.49
 -22 -4 0 -5.41 -7.68
 22 4 0 -5.41 7.68
 24 -4 0 0.03 -8.72
 -24 -4 0 0.17 5.07
 24 4 0 0.17 -5.07
 26 -4 0 -1.95 -8.59
 -26 -4 0 -3.75 6.90
 26 4 0 -3.75 -6.90
 28 -4 0 0.69 -3.08
 28 4 0 0.43 -1.25
 1 -5 0 8.19 9.21
 -1 -5 0 7.45 -9.98
 -1 5 0 8.19 -9.21
 1 5 0 7.45 9.98
 -3 -5 0 -12.56 -3.89
 -3 -5 0 -12.56 -3.89
 3 -5 0 -11.40 2.99
 3 -5 0 -11.40 2.99
 3 5 0 -12.56 3.89
 -3 5 0 -11.40 -2.99
 -5 -5 0 -42.80 -1.75
 5 -5 0 -43.60 -1.31
 5 -5 0 -43.60 -1.31
 -5 5 0 -43.60 1.31
 7 -5 0 -20.96 8.99
 7 -5 0 -20.96 8.99
 -7 -5 0 -20.73 -0.14
 7 5 0 -20.73 0.14
 -7 5 0 -20.96 -8.99
 9 -5 0 2.72 11.47
 9 -5 0 2.72 11.47
 -9 -5 0 2.69 -4.48
 9 5 0 2.69 4.48
 -9 5 0 2.72 -11.47
 11 -5 0 10.38 -1.58
 11 -5 0 10.38 -1.58
 -11 -5 0 9.88 3.75
 11 5 0 9.88 -3.75
 -11 5 0 10.38 1.58
 -13 -5 0 -3.98 -4.29
 13 -5 0 -0.93 -7.64
 13 -5 0 -0.93 -7.64
 13 5 0 -3.98 4.29
 15 -5 0 -5.02 -2.05
 -15 -5 0 -6.37 -4.19
 15 -5 0 -5.02 -2.05
 15 5 0 -6.37 4.19
 -17 -5 0 0.86 -2.74
 17 -5 0 0.49 -5.40
 17 -5 0 0.49 -5.40
 17 5 0 0.86 2.74
 -19 -5 0 3.02 -4.58
 19 -5 0 3.81 -1.12
 19 -5 0 3.81 -1.12
 19 5 0 3.02 4.58
 21 -5 0 4.39 6.12
 21 -5 0 4.39 6.12
 -21 -5 0 4.08 7.53
 21 5 0 4.08 -7.53
 23 -5 0 0.31 1.65
 23 -5 0 0.31 1.65
 -23 -5 0 -0.13 3.48
 23 5 0 -0.13 -3.48
 25 -5 0 -2.20 1.26
 25 -5 0 -2.20 1.26
 -25 -5 0 -2.01 -6.99
 25 5 0 -2.01 6.99
 27 -5 0 -4.96 -0.54
 27 5 0 -3.90 3.00
 29 -5 0 -2.91 -2.24
 29 5 0 -2.06 2.67
 0 -6 0 18.80 -2.99
 0 -6 0 18.80 -2.99
 -2 -6 0 13.19 6.93
 2 -6 0 12.35 0.03
 2 -6 0 12.35 0.03
 -2 6 0 12.35 -0.03
 2 6 0 13.19 -6.93
 4 -6 0 -12.28 7.06
 4 -6 0 -12.28 7.06
 -4 -6 0 -11.51 -5.51
 -4 -6 0 -11.51 -5.51
 -4 6 0 -12.28 -7.06
 -6 -6 0 -3.79 0.20
 6 -6 0 -3.68 4.65
 6 -6 0 -3.68 4.65
 -6 6 0 -3.68 -4.65
 8 -6 0 -11.78 0.10
 -8 -6 0 -11.08 -7.36
 8 -6 0 -11.78 0.10
 8 6 0 -11.08 7.36
 -8 6 0 -11.78 -0.10
 10 -6 0 0.96 -4.61
 -10 -6 0 1.85 -1.68
 10 -6 0 0.96 -4.61
 10 6 0 1.85 1.68
 -10 6 0 0.96 4.61
 12 -6 0 3.10 5.47
 12 -6 0 3.10 5.47
 -12 -6 0 5.35 -9.31
 -12 6 0 3.10 -5.47
 12 6 0 5.35 9.31
 -14 -6 0 3.02 7.22
 14 -6 0 0.44 -4.02
 14 -6 0 0.44 -4.02
 -14 6 0 0.44 4.02
 14 6 0 3.02 -7.22
 16 -6 0 -1.50 1.92
 -16 -6 0 -0.58 -2.16
 16 -6 0 -1.50 1.92
 16 6 0 -0.58 2.16
 -16 6 0 -1.50 -1.92
 -18 -6 0 -3.55 5.05
 18 -6 0 -4.63 -2.78
 18 -6 0 -4.63 -2.78
 18 6 0 -3.55 -5.05
 -20 -6 0 -1.78 -0.05
 20 -6 0 -2.29 -0.59
 20 -6 0 -2.29 -0.59
 20 6 0 -1.78 0.05
 22 -6 0 -2.09 0.20
 -22 -6 0 -1.40 -4.80
 22 -6 0 -2.09 0.20
 22 6 0 -1.40 4.80
 24 -6 0 -0.51 1.06
 24 -6 0 -0.51 1.06
 -24 -6 0 -1.28 -2.54
 24 6 0 -1.28 2.54
 26 -6 0 3.30 3.30
 -26 -6 0 3.22 -0.03
 26 6 0 3.22 0.03
 28 -6 0 2.24 3.87
 28 6 0 1.85 -1.98
 1 -7 0 -20.83 -2.69
 1 -7 0 -20.83 -2.69
 -1 -7 0 -21.20 -1.56
 1 7 0 -21.20 1.56
 -1 7 0 -20.83 2.69
 -3 -7 0 10.96 4.22
 3 -7 0 12.23 -8.14
 3 -7 0 12.23 -8.14
 -3 -7 0 10.96 4.22
 3 7 0 10.96 -4.22
 -3 7 0 12.23 8.14
 5 -7 0 11.94 -9.65
 -5 -7 0 11.37 4.95
 5 -7 0 11.94 -9.65
 -5 7 0 11.94 9.65
 5 7 0 11.37 -4.95
 -7 -7 0 17.34 -5.80
 7 -7 0 17.33 -1.54
 -7 -7 0 17.34 -5.80
 7 -7 0 17.33 -1.54
 -7 7 0 17.33 1.54
 9 -7 0 -6.97 3.62
 -9 -7 0 -7.05 -0.39
 -9 7 0 -6.97 -3.62
 9 7 0 -7.05 0.39
 -11 -7 0 -10.50 -1.77
 11 -7 0 -9.13 0.42
 11 -7 0 -9.13 0.42
 -11 7 0 -9.13 -0.42
 13 -7 0 -5.72 1.40
 13 -7 0 -5.72 1.40
 -13 -7 0 -6.16 1.34
 13 7 0 -6.16 -1.34
 -13 7 0 -5.72 -1.40
 15 -7 0 -3.89 -2.11
 -15 -7 0 -4.53 0.52
 15 -7 0 -3.89 -2.11
 -15 7 0 -3.89 2.11
 15 7 0 -4.53 -0.52
 17 -7 0 -3.09 2.35
 -17 -7 0 -3.75 -2.06
 17 -7 0 -3.09 2.35
 17 7 0 -3.75 2.06
 -17 7 0 -3.09 -2.35
 19 -7 0 -1.01 1.39
 -19 -7 0 -1.87 -3.80
 19 -7 0 -1.01 1.39
 -19 7 0 -1.01 -1.39
 19 7 0 -1.87 3.80
 21 -7 0 -1.21 -4.48
 21 -7 0 -1.21 -4.48
 -21 -7 0 -1.73 -2.89
 21 7 0 -1.73 2.89
 -21 7 0 -1.21 4.48
 23 -7 0 3.19 0.18
 23 -7 0 3.19 0.18
 -23 -7 0 3.39 1.36
 -23 7 0 3.19 -0.18
 23 7 0 3.39 -1.36
 25 -7 0 1.69 -3.84
 25 -7 0 1.69 -3.84
 -25 -7 0 2.27 3.17
 -25 7 0 1.69 3.84
 25 7 0 2.27 -3.17
 27 7 0 -2.32 2.57
 0 -8 0 20.99 5.74
 0 -8 0 20.99 5.74
 0 8 0 20.99 -5.74
 2 -8 0 -0.24 1.06
 -2 -8 0 0.67 1.54
 -2 -8 0 0.67 1.54
 2 -8 0 -0.24 1.06
 2 8 0 0.67 -1.54
 -2 8 0 -0.24 -1.06
 4 -8 0 -3.85 3.75
 4 -8 0 -3.85 3.75
 -4 -8 0 -1.99 1.46
 4 8 0 -1.99 -1.46
 -4 8 0 -3.85 -3.75
 -6 -8 0 -3.83 4.82
 6 -8 0 -3.88 2.33
 -6 -8 0 -3.83 4.82
 -6 8 0 -3.88 -2.33
 6 8 0 -3.83 -4.82
 -8 -8 0 -3.25 6.60
 8 -8 0 -3.10 1.32
 8 -8 0 -3.10 1.32
 -8 -8 0 -3.25 6.60
 -8 8 0 -3.10 -1.32
 -10 -8 0 7.26 -3.69
 10 -8 0 6.80 4.92
 -10 -8 0 7.26 -3.69
 10 -8 0 6.80 4.92
 -10 8 0 6.80 -4.92
 -12 -8 0 -2.09 -0.83
 12 -8 0 -2.08 4.98
 12 -8 0 -2.08 4.98
 -12 8 0 -2.08 -4.98
 12 8 0 -2.09 0.83
 14 -8 0 -1.76 5.97
 -14 -8 0 -2.27 -7.41
 14 -8 0 -1.76 5.97
 14 8 0 -2.27 7.41
 -14 8 0 -1.76 -5.97
 -16 -8 0 2.69 -0.62
 16 -8 0 3.20 0.88
 16 -8 0 3.20 0.88
 16 8 0 2.69 0.62
 -16 8 0 3.20 -0.88
 18 -8 0 2.82 -3.74
 18 -8 0 2.82 -3.74
 -18 -8 0 3.97 -0.12
 -18 8 0 2.82 3.74
 18 8 0 3.97 0.12
 20 -8 0 3.89 0.07
 20 -8 0 3.89 0.07
 -20 -8 0 5.67 1.70
 -20 8 0 3.89 -0.07
 20 8 0 5.67 -1.70
 22 -8 0 0.02 -2.46
 -22 -8 0 0.89 0.40
 -22 8 0 0.02 2.46
 22 8 0 0.89 -0.40
 24 -8 0 -0.66 -0.29
 -24 -8 0 0.21 -0.44
 24 8 0 0.21 0.44
 -24 8 0 -0.66 0.29
 -26 -8 0 1.58 3.45
 26 8 0 1.58 -3.45
 -1 -9 0 -1.27 -2.97
 1 -9 0 -1.25 -0.95
 1 -9 0 -1.25 -0.95
 1 9 0 -1.27 2.97
 -1 9 0 -1.25 0.95
 3 -9 0 3.31 2.78
 -3 -9 0 2.41 -6.51
 3 -9 0 3.31 2.78
 3 9 0 2.41 6.51
 -3 9 0 3.31 -2.78
 5 -9 0 1.95 1.58
 -5 -9 0 1.70 -2.53
 5 -9 0 1.95 1.58
 -5 -9 0 1.70 -2.53
 5 9 0 1.70 2.53
 -5 9 0 1.95 -1.58
 -7 -9 0 2.45 2.63
 -7 -9 0 2.45 2.63
 7 -9 0 1.92 -8.71
 7 -9 0 1.92 -8.71
 7 9 0 2.45 -2.63
 -7 9 0 1.92 8.71
 -9 -9 0 4.77 2.67
 9 -9 0 4.43 -3.93
 -9 -9 0 4.77 2.67
 -9 9 0 4.43 3.93
 -11 -9 0 2.09 6.55
 -11 -9 0 2.09 6.55
 11 -9 0 1.92 -5.90
 11 -9 0 1.92 -5.90
 11 9 0 2.09 -6.55
 -11 9 0 1.92 5.90
 -13 -9 0 10.20 1.65
 13 -9 0 10.32 -1.86
 13 -9 0 10.32 -1.86
 -13 -9 0 10.20 1.65
 13 9 0 10.20 -1.65
 -13 9 0 10.32 1.86
 -15 -9 0 4.25 2.67
 15 -9 0 3.46 -0.26
 15 9 0 4.25 -2.67
 -15 9 0 3.46 0.26
 -17 -9 0 -1.15 2.65
 17 -9 0 -0.78 0.22
 17 9 0 -1.15 -2.65
 -17 9 0 -0.78 -0.22
 -19 -9 0 -1.49 2.20
 19 -9 0 -0.53 0.93
 19 9 0 -1.49 -2.20
 -19 9 0 -0.53 -0.93
 -21 -9 0 -3.13 3.93
 21 -9 0 -1.95 3.12
 -21 9 0 -1.95 -3.12
 21 9 0 -3.13 -3.93
 -23 -9 0 -1.19 2.78
 23 -9 0 -0.45 1.98
 23 9 0 -1.19 -2.78
 -23 9 0 -0.45 -1.98
 -25 -9 0 -1.23 -1.14
 25 9 0 -1.23 1.14
 0 -10 0 -5.73 -1.20
 0 10 0 -5.73 1.20
 2 -10 0 -0.66 -1.27
 2 -10 0 -0.66 -1.27
 2 10 0 -0.16 -1.59
 -2 10 0 -0.66 1.27
 -4 -10 0 5.08 3.22
 -4 -10 0 5.08 3.22
 4 -10 0 5.13 -5.94
 4 -10 0 5.13 -5.94
 -4 10 0 5.13 5.94
 4 10 0 5.08 -3.22
 6 -10 0 3.86 1.14
 -6 -10 0 3.75 -1.48
 -6 -10 0 3.75 -1.48
 6 10 0 3.75 1.48
 -6 10 0 3.86 -1.14
 -8 -10 0 0.65 2.02
 -8 -10 0 0.65 2.02
 8 -10 0 0.92 -0.45
 -8 10 0 0.92 0.45
 8 10 0 0.65 -2.02
 -10 -10 0 1.98 4.66
 10 -10 0 2.40 -2.48
 -10 -10 0 1.98 4.66
 -10 10 0 2.40 2.48
 10 10 0 1.98 -4.66
 12 -10 0 -1.02 -3.45
 -12 -10 0 -0.85 7.06
 -12 -10 0 -0.85 7.06
 12 10 0 -0.85 -7.06
 -12 10 0 -1.02 3.45
 -14 -10 0 -0.34 1.11
 -14 -10 0 -0.34 1.11
 14 -10 0 0.74 1.63
 -14 10 0 0.74 -1.63
 14 10 0 -0.34 -1.11
 -16 -10 0 1.40 0.06
 -16 -10 0 1.40 0.06
 16 -10 0 2.04 -0.17
 16 10 0 1.40 -0.06
 -16 10 0 2.04 0.17
 -18 -10 0 -0.56 -0.79
 -18 -10 0 -0.56 -0.79
 18 -10 0 -0.10 3.06
 18 10 0 -0.56 0.79
 -18 10 0 -0.10 -3.06
 -20 -10 0 -4.75 -1.85
 -20 -10 0 -4.75 -1.85
 20 -10 0 -4.07 -4.94
 -20 10 0 -4.07 4.94
 20 10 0 -4.75 1.85
 22 -10 0 -0.94 0.62
 -22 -10 0 -0.67 0.26
 -22 -10 0 -0.67 0.26
 -22 10 0 -0.94 -0.62
 22 10 0 -0.67 -0.26
 -24 -10 0 -2.98 1.15
 -24 -10 0 -2.98 1.15
 24 10 0 -2.98 -1.15
 1 -11 0 3.97 0.00
 -1 -11 0 2.89 -2.92
 -1 11 0 3.97 0.00
 1 11 0 2.89 2.92
 -3 -11 0 -3.82 -0.45
 3 -11 0 -3.43 -2.61
 -3 -11 0 -3.82 -0.45
 -3 11 0 -3.43 2.61
 3 11 0 -3.82 0.45
 5 -11 0 -5.04 -0.94
 -5 -11 0 -5.38 -2.95
 -5 -11 0 -5.38 -2.95
 -5 11 0 -5.04 0.94
 5 11 0 -5.38 2.95
 7 -11 0 -2.23 1.00
 -7 -11 0 -2.39 -2.37
 -7 -11 0 -2.39 -2.37
 7 11 0 -2.39 2.37
 -7 11 0 -2.23 -1.00
 -9 -11 0 0.94 -2.38
 9 -11 0 1.60 3.81
 -9 -11 0 0.94 -2.38
 9 11 0 0.94 2.38
 -9 11 0 1.60 -3.81
 -11 -11 0 -0.87 -10.49
 11 -11 0 -1.13 9.69
 -11 -11 0 -0.87 -10.49
 -11 11 0 -1.13 -9.69
 11 11 0 -0.87 10.49
 13 -11 0 -1.40 3.81
 -13 -11 0 -0.51 -2.16
 -13 -11 0 -0.51 -2.16
 -13 11 0 -1.40 -3.81
 13 11 0 -0.51 2.16
 -15 -11 0 -2.78 2.30
 15 -11 0 -3.66 3.94
 -15 -11 0 -2.78 2.30
 -15 11 0 -3.66 -3.94
 15 11 0 -2.78 -2.30
 17 -11 0 1.45 3.32
 -17 -11 0 1.60 4.07
 -17 -11 0 1.60 4.07
 17 11 0 1.60 -4.07
 -17 11 0 1.45 -3.32
 -19 -11 0 1.63 7.35
 -19 -11 0 1.63 7.35
 19 -11 0 2.47 8.44
 19 11 0 1.63 -7.35
 -19 11 0 2.47 -8.44
 21 -11 0 5.85 5.94
 -21 -11 0 6.43 2.75
 -21 -11 0 6.43 2.75
 21 11 0 6.43 -2.75
 -21 11 0 5.85 -5.94
 -23 -11 0 1.72 -1.20
 23 -11 0 1.95 4.23
 -23 -11 0 1.72 -1.20
 23 11 0 1.72 1.20
 0 -12 0 0.27 -0.05
 0 12 0 0.27 0.05
 2 -12 0 0.16 1.26
 -2 -12 0 0.29 -3.21
 2 12 0 0.29 3.21
 -2 12 0 0.16 -1.26
 -4 -12 0 1.51 -0.79
 4 -12 0 1.96 4.18
 -4 12 0 1.96 -4.18
 4 12 0 1.51 0.79
 6 -12 0 0.56 2.00
 -6 -12 0 -0.01 -1.96
 6 12 0 -0.01 1.96
 -6 12 0 0.56 -2.00
 8 -12 0 -3.62 3.51
 -8 -12 0 -3.21 -3.77
 8 12 0 -3.21 3.77
 -8 12 0 -3.62 -3.51
 10 -12 0 -0.43 -1.94
 -10 -12 0 0.20 0.63
 -10 -12 0 0.20 0.63
 10 12 0 0.20 -0.63
 -10 12 0 -0.43 1.94
 12 -12 0 -1.46 -3.36
 -12 -12 0 -1.47 4.69
 -12 -12 0 -1.47 4.69
 -12 12 0 -1.46 3.36
 12 12 0 -1.47 -4.69
 -14 -12 0 0.58 7.08
 -14 -12 0 0.58 7.08
 14 -12 0 1.03 -6.25
 -14 12 0 1.03 6.25
 14 12 0 0.58 -7.08
 -16 -12 0 -0.47 -0.42
 16 -12 0 -0.49 -3.53
 -16 -12 0 -0.47 -0.42
 -16 12 0 -0.49 3.53
 16 12 0 -0.47 0.42
 18 -12 0 0.07 -3.81
 -18 -12 0 1.84 -4.54
 -18 -12 0 1.84 -4.54
 18 12 0 1.84 4.54
 -18 12 0 0.07 3.81
 -20 -12 0 -0.20 -2.33
 20 -12 0 -1.41 -2.08
 -20 -12 0 -0.20 -2.33
 -20 12 0 -1.41 2.08
 20 12 0 -0.20 2.33
 -22 -12 0 -2.08 -0.80
 22 -12 0 -1.57 -4.42
 -22 -12 0 -2.08 -0.80
 22 12 0 -2.08 0.80
 -1 -13 0 -0.90 4.01
 1 -13 0 -0.96 -4.68
 1 13 0 -0.90 -4.01
 -1 13 0 -0.96 4.68
 3 -13 0 -2.04 -1.63
 -3 -13 0 -2.25 0.86
 -3 13 0 -2.04 1.63
 3 13 0 -2.25 -0.86
 -5 -13 0 0.77 -2.03
 5 -13 0 1.37 0.32
 5 13 0 0.77 2.03
 -5 13 0 1.37 -0.32
 -7 -13 0 6.59 -1.07
 7 -13 0 6.46 -0.41
 7 13 0 6.59 1.07
 -7 13 0 6.46 0.41
 -9 -13 0 0.83 1.03
 9 -13 0 1.53 -2.92
 -9 13 0 1.53 2.92
 9 13 0 0.83 -1.03
 -11 -13 0 0.33 -2.01
 11 -13 0 0.61 0.91
 -11 13 0 0.61 -0.91
 11 13 0 0.33 2.01
 -13 -13 0 2.40 -6.31
 13 -13 0 2.14 5.55
 13 13 0 2.40 6.31
 -13 13 0 2.14 -5.55
 15 -13 0 1.40 7.59
 -15 -13 0 2.81 -6.93
 -15 13 0 1.40 -7.59
 15 13 0 2.81 6.93
 17 -13 0 0.89 2.34
 -17 -13 0 0.33 4.79
 17 13 0 0.33 -4.79
 -17 13 0 0.89 -2.34
 19 -13 0 2.04 -1.54
 -19 -13 0 0.71 -2.87
 -19 13 0 2.04 1.54
 19 13 0 0.71 2.87
 0 -14 0 4.48 2.20
 0 14 0 4.48 -2.20
 -2 -14 0 5.68 -3.38
 2 -14 0 5.36 5.39
 2 14 0 5.68 3.38
 -2 14 0 5.36 -5.39
 4 -14 0 4.27 -2.65
 -4 -14 0 5.19 1.23
 -4 14 0 4.27 2.65
 4 14 0 5.19 -1.23
 6 -14 0 -1.12 -3.49
 -6 -14 0 -1.60 4.30
 -6 14 0 -1.12 3.49
 6 14 0 -1.60 -4.30
 -8 -14 0 -2.41 -1.55
 8 -14 0 -1.73 -0.43
 -8 14 0 -1.73 0.43
 8 14 0 -2.41 1.55
 -10 -14 0 1.74 0.55
 10 -14 0 2.38 -1.72
 10 14 0 1.74 -0.55
 -10 14 0 2.38 1.72
 -12 -14 0 0.20 1.86
 12 -14 0 1.35 -4.79
 -12 14 0 1.35 4.79
 12 14 0 0.20 -1.86
 14 -14 0 -0.45 -7.11
 -14 -14 0 -1.31 2.49
 -14 14 0 -0.45 7.11
 14 14 0 -1.31 -2.49
 -16 -14 0 -2.94 -1.23
 16 -14 0 -1.06 -3.28
 -16 14 0 -1.06 3.28
 16 14 0 -2.94 1.23
 18 -14 0 -0.63 1.47
 -18 -14 0 0.14 0.23
 18 14 0 0.14 -0.23
 -18 14 0 -0.63 -1.47
 1 -15 0 -4.16 -4.48
 -1 -15 0 -5.01 -1.65
 1 15 0 -5.01 1.65
 -1 15 0 -4.16 4.48
 -3 -15 0 -4.73 0.54
 3 -15 0 -3.67 -0.20
 -3 15 0 -3.67 0.20
 3 15 0 -4.73 -0.54
 -5 -15 0 -2.08 -2.88
 5 -15 0 -0.88 2.32
 5 15 0 -2.08 2.88
 -5 15 0 -0.88 -2.32
 -7 -15 0 1.13 -0.78
 7 -15 0 1.61 -1.61
 -7 15 0 1.61 1.61
 7 15 0 1.13 0.78
 -9 -15 0 -1.29 -0.70
 9 -15 0 -1.38 1.16
 9 15 0 -1.29 0.70
 -9 15 0 -1.38 -1.16
 -11 -15 0 -1.38 -1.02
 11 -15 0 -2.70 0.90
 11 15 0 -1.38 1.02
 -11 15 0 -2.70 -0.90
 -13 -15 0 1.00 -1.67
 13 -15 0 1.36 4.50
 13 15 0 1.00 1.67
 -13 15 0 1.36 -4.50
 -15 -15 0 2.27 1.79
 15 -15 0 1.51 1.42
 15 15 0 2.27 -1.79
 -15 15 0 1.51 -1.42
 0 -16 0 -0.68 1.05
 0 16 0 -0.68 -1.05
 2 -16 0 1.84 -1.95
 -2 -16 0 2.47 -0.78
 2 16 0 2.47 0.78
 -2 16 0 1.84 1.95
 4 -16 0 0.24 0.24
 -4 -16 0 1.35 -3.14
 4 16 0 1.35 3.14
 -4 16 0 0.24 -0.24
 6 -16 0 -3.73 2.72
 -6 -16 0 -1.30 -1.33
 6 16 0 -1.30 1.33
 -6 16 0 -3.73 -2.72
 8 -16 0 1.45 2.75
 -8 -16 0 1.82 0.75
 8 16 0 1.82 -0.75
 -8 16 0 1.45 -2.75
 10 -16 0 3.73 0.97
 -10 -16 0 3.47 -0.81
 10 16 0 3.47 0.81
 -10 16 0 3.73 -0.97
 12 -16 0 0.95 1.03
 -12 -16 0 0.63 -0.32
 12 16 0 0.63 0.32
 -12 16 0 0.95 -1.03
 -1 -17 0 1.96 -1.68
 1 -17 0 0.78 1.94
 1 17 0 1.96 1.68
 -1 17 0 0.78 -1.94
 3 -17 0 0.36 0.15
 -3 -17 0 -0.18 0.57
 3 17 0 -0.18 -0.57
 -3 17 0 0.36 -0.15
 5 -17 0 2.77 -1.60
 -5 -17 0 1.95 1.53
 -5 17 0 2.77 1.60
 5 17 0 1.95 -1.53
 7 -17 0 1.75 -1.27
 -7 -17 0 0.74 0.27
 -7 17 0 1.75 1.27
 7 17 0 0.74 -0.27
 31 -1 -1 2.66 1.64
 29 -1 -1 1.27 4.77
 29 1 -1 -2.50 -2.05
 27 -1 -1 0.45 -0.41
 27 1 -1 -0.16 1.62
 25 -1 -1 1.10 -3.70
 25 1 -1 -0.85 1.01
 25 1 -1 -0.85 1.01
 23 -1 -1 1.09 -4.01
 23 1 -1 -0.32 0.53
 23 1 -1 -0.32 0.53
 21 -1 -1 -1.18 -1.54
 21 1 -1 0.87 2.77
 21 1 -1 0.87 2.77
 19 -1 -1 6.41 3.89
 19 1 -1 -7.08 -1.37
 19 1 -1 -7.08 -1.37
 17 -1 -1 12.31 0.23
 17 1 -1 -13.25 1.94
 15 -1 -1 16.77 -1.42
 15 1 -1 -17.18 7.92
 15 1 -1 -17.18 7.92
 13 -1 -1 8.53 8.92
 13 -1 -1 8.53 8.92
 13 1 -1 -8.35 13.15
 13 1 -1 -8.35 13.15
 11 -1 -1 -10.89 3.54
 11 1 -1 12.67 3.07
 11 1 -1 12.67 3.07
 9 -1 -1 0.11 1.25
 9 1 -1 0.42 1.03
 7 -1 -1 54.12 -8.36
 7 -1 -1 54.12 -8.36
 7 1 -1 -53.21 10.80
 5 -1 -1 85.67 -14.63
 5 -1 -1 85.67 -14.63
 5 1 -1 -87.01 15.67
 3 -1 -1 86.49 -34.74
 -3 -1 1 -88.90 -19.92
 3 -1 -1 86.49 -34.74
 3 1 -1 -88.90 19.92
 -3 1 1 86.49 34.74
 3 1 -1 -88.90 19.92
 -1 -1 1 173.68 25.85
 -1 -1 1 173.68 25.85
 1 -1 -1 -172.58 -25.22
 1 1 -1 173.68 -25.85
 -1 1 1 -172.58 25.22
 1 1 -1 173.68 -25.85
 -1 1 1 -172.58 25.22
 -1 1 1 -172.58 25.22
 1 1 -1 173.68 -25.85
 -1 -1 -1 -2.07 0.32
 -1 -1 -1 -2.07 0.32
 1 -1 1 3.04 21.33
 1 -1 1 3.04 21.33
 -1 1 -1 3.04 -21.33
 1 1 1 -2.07 -0.32
 -1 1 -1 3.04 -21.33
 3 -1 1 43.34 -5.40
 3 -1 1 43.34 -5.40
 -3 -1 -1 -43.19 -14.16
 -3 1 -1 43.34 5.40
 -3 1 -1 43.34 5.40
 3 1 1 -43.19 14.16
 5 -1 1 -18.88 -2.87
 5 -1 1 -18.88 -2.87
 5 1 1 19.67 -1.87
 5 1 1 19.67 -1.87
 7 -1 1 -16.60 -0.57
 7 -1 1 -16.60 -0.57
 7 1 1 18.17 -6.30
 9 -1 1 1.09 -2.33
 9 1 1 -1.84 -4.17
 9 1 1 -1.84 -4.17
 11 -1 1 5.32 -6.42
 11 1 1 -7.19 -8.59
 11 1 1 -7.19 -8.59
 13 -1 1 0.41 4.61
 13 1 1 -1.43 -5.73
 13 1 1 -1.43 -5.73
 15 -1 1 -3.39 0.07
 15 1 1 3.11 -3.60
 15 1 1 3.11 -3.60
 17 -1 1 -3.89 -3.32
 17 1 1 3.71 0.41
 17 1 1 3.71 0.41
 19 -1 1 1.09 -0.53
 19 1 1 -0.64 1.07
 19 1 1 -0.64 1.07
 21 -1 1 -3.98 0.04
 21 1 1 3.84 1.04
 21 1 1 3.84 1.04
 23 -1 1 -2.82 2.75
 23 1 1 3.41 -2.36
 25 -1 1 1.69 2.67
 30 -2 -1 -3.48 -3.54
 -28 -2 1 -1.23 3.44
 28 -2 -1 1.18 -4.72
 28 2 -1 -1.23 -3.44
 28 2 -1 -1.23 -3.44
 26 -2 -1 -1.08 1.43
 26 2 -1 -0.03 -6.79
 26 2 -1 -0.03 -6.79
 24 -2 -1 0.69 3.32
 24 2 -1 -0.53 -1.33
 24 2 -1 -0.53 -1.33
 22 -2 -1 2.35 3.28
 22 2 -1 -2.06 -1.65
 22 2 -1 -2.06 -1.65
 20 -2 -1 0.14 0.91
 20 2 -1 0.01 1.14
 20 2 -1 0.01 1.14
 18 -2 -1 -7.94 -7.37
 18 -2 -1 -7.94 -7.37
 18 2 -1 7.50 -1.77
 16 -2 -1 -7.20 4.00
 16 -2 -1 -7.20 4.00
 16 2 -1 7.02 2.58
 16 2 -1 7.02 2.58
 14 -2 -1 -5.86 -8.09
 14 -2 -1 -5.86 -8.09
 14 2 -1 6.29 -8.68
 14 2 -1 6.29 -8.68
 12 -2 -1 22.87 -4.50
 12 -2 -1 22.87 -4.50
 12 2 -1 -23.33 -5.80
 12 2 -1 -23.33 -5.80
 8 -2 -1 -21.19 4.46
 8 -2 -1 -21.19 4.46
 8 2 -1 23.22 -11.28
 8 2 -1 23.22 -11.28
 6 -2 -1 -87.55 -3.94
 6 -2 -1 -87.55 -3.94
 -6 -2 1 88.72 1.97
 6 2 -1 88.72 -1.97
 6 2 -1 88.72 -1.97
 4 -2 -1 -75.49 25.68
 4 -2 -1 -75.49 25.68
 -4 2 1 -75.49 -25.68
 4 2 -1 81.73 -35.03
 4 2 -1 81.73 -35.03
 2 -2 -1 139.57 14.62
 -2 -2 1 -137.74 -0.74
 2 -2 -1 139.57 14.62
 -2 -2 1 -137.74 -0.74
 -2 2 1 139.57 -14.62
 2 2 -1 -137.74 0.74
 -2 2 1 139.57 -14.62
 2 2 -1 -137.74 0.74
 0 -2 -1 206.19 15.90
 0 -2 -1 206.19 15.90
 0 -2 1 -206.43 -1.51
 0 2 1 206.19 -15.90
 0 2 1 206.19 -15.90
 2 -2 1 -71.46 -0.13
 -2 -2 -1 69.29 -0.02
 2 -2 1 -71.46 -0.13
 -2 2 -1 -71.46 0.13
 -2 2 -1 -71.46 0.13
 4 -2 1 -8.34 28.34
 4 -2 1 -8.34 28.34
 -4 -2 -1 6.83 22.85
 4 2 1 6.83 -22.85
 -6 -2 -1 -42.86 -16.00
 6 -2 1 37.21 3.61
 6 -2 1 37.21 3.61
 6 2 1 -42.86 16.00
 6 2 1 -42.86 16.00
 -8 -2 -1 -13.88 -7.82
 8 -2 1 11.68 0.32
 8 -2 1 11.68 0.32
 10 -2 1 -20.81 1.85
 10 -2 1 -20.81 1.85
 10 2 1 21.10 8.50
 12 -2 1 -16.81 1.87
 12 -2 1 -16.81 1.87
 12 2 1 17.91 0.68
 14 -2 1 -7.62 -6.79
 14 -2 1 -7.62 -6.79
 14 2 1 8.12 -3.63
 16 -2 1 4.77 7.17
 16 -2 1 4.77 7.17
 16 2 1 -3.10 3.31
 18 -2 1 -2.87 1.89
 18 2 1 3.40 -2.04
 18 2 1 3.40 -2.04
 20 -2 1 -2.55 2.49
 20 2 1 1.70 -1.34
 20 2 1 1.70 -1.34
 22 -2 1 1.29 0.04
 -22 -2 -1 -2.56 0.55
 22 2 1 -2.56 -0.55
 24 -2 1 2.00 -3.49
 -24 -2 -1 -2.02 -5.27
 24 2 1 -2.02 5.27
 26 -2 1 -3.99 -1.08
 26 2 1 3.55 2.96
 29 -3 -1 2.63 5.26
 29 3 -1 -1.55 5.51
 27 -3 -1 0.92 5.21
 -27 -3 1 0.43 -6.69
 27 3 -1 0.43 6.69
 -25 -3 1 -3.10 -5.72
 25 -3 -1 3.68 1.94
 25 3 -1 -3.10 5.72
 25 3 -1 -3.10 5.72
 -23 -3 1 -0.39 0.13
 23 -3 -1 1.59 3.22
 23 3 -1 -0.39 -0.13
 23 3 -1 -0.39 -0.13
 -21 -3 1 -1.88 0.19
 21 -3 -1 1.36 1.98
 21 -3 -1 1.36 1.98
 21 3 -1 -1.88 -0.19
 21 3 -1 -1.88 -0.19
 -19 -3 1 -0.96 -4.87
 19 -3 -1 1.53 8.30
 19 -3 -1 1.53 8.30
 19 3 -1 -0.96 4.87
 19 3 -1 -0.96 4.87
 -17 -3 1 -0.34 -1.10
 17 -3 -1 0.28 4.87
 17 -3 -1 0.28 4.87
 17 3 -1 -0.34 1.10
 17 3 -1 -0.34 1.10
 -15 -3 1 -4.34 -6.06
 15 -3 -1 4.40 2.03
 15 -3 -1 4.40 2.03
 15 3 -1 -4.34 6.06
 15 3 -1 -4.34 6.06
 -13 -3 1 4.61 -6.63
 13 -3 -1 -4.66 3.36
 13 -3 -1 -4.66 3.36
 13 3 -1 4.61 6.63
 13 3 -1 4.61 6.63
 11 -3 -1 -10.60 -1.13
 -11 -3 1 11.17 0.59
 11 -3 -1 -10.60 -1.13
 11 3 -1 11.17 -0.59
 11 3 -1 11.17 -0.59
 -9 -3 1 -2.88 -1.94
 9 -3 -1 3.13 -6.02
 9 3 -1 -2.88 1.94
 9 3 -1 -2.88 1.94
 7 -3 -1 55.35 -1.35
 7 -3 -1 55.35 -1.35
 -7 -3 1 -56.45 -0.67
 7 3 -1 -56.45 0.67
 7 3 -1 -56.45 0.67
 5 -3 -1 105.69 -10.27
 5 -3 -1 105.69 -10.27
 -5 -3 1 -106.42 -15.00
 -5 3 1 105.69 10.27
 5 3 -1 -106.42 15.00
 5 3 -1 -106.42 15.00
 3 -3 -1 7.42 -16.17
 3 -3 -1 7.42 -16.17
 3 3 -1 -9.53 17.00
 -3 3 1 7.42 16.17
 -1 -3 1 17.82 -11.58
 -1 -3 1 17.82 -11.58
 1 -3 -1 -18.41 -5.90
 -1 3 1 -18.41 5.90
 -1 3 1 -18.41 5.90
 -1 -3 -1 -49.11 2.62
 -1 -3 -1 -49.11 2.62
 1 -3 1 49.26 3.20
 1 -3 1 49.26 3.20
 1 3 1 -49.11 -2.62
 -1 3 -1 49.26 -3.20
 -1 3 -1 49.26 -3.20
 3 -3 1 -56.95 2.14
 3 -3 1 -56.95 2.14
 -3 -3 -1 57.37 5.83
 -3 3 -1 -56.95 -2.14
 -3 3 -1 -56.95 -2.14
 -5 -3 -1 54.20 3.54
 5 -3 1 -51.14 -3.61
 5 -3 1 -51.14 -3.61
 -7 -3 -1 40.81 13.32
 7 -3 1 -38.58 5.26
 7 -3 1 -38.58 5.26
 7 3 1 40.81 -13.32
 -9 -3 -1 7.94 4.39
 9 3 1 7.94 -4.39
 11 -3 1 11.38 -1.42
 11 -3 1 11.38 -1.42
 -11 -3 -1 -11.97 -0.78
 11 3 1 -11.97 0.78
 11 3 1 -11.97 0.78
 -13 -3 -1 -3.63 -3.80
 13 -3 1 3.08 1.56
 13 -3 1 3.08 1.56
 13 3 1 -3.63 3.80
 13 3 1 -3.63 3.80
 15 -3 1 -0.84 -0.50
 15 -3 1 -0.84 -0.50
 -15 -3 -1 -0.23 2.70
 15 3 1 -0.23 -2.70
 15 3 1 -0.23 -2.70
 -17 -3 -1 -0.99 10.23
 17 -3 1 0.07 -6.43
 17 -3 1 0.07 -6.43
 17 3 1 -0.99 -10.23
 17 3 1 -0.99 -10.23
 19 -3 1 2.98 -6.36
 -19 -3 -1 -2.13 2.38
 19 -3 1 2.98 -6.36
 19 3 1 -2.13 -2.38
 -21 -3 -1 0.01 -1.41
 21 -3 1 0.22 -6.20
 21 3 1 0.01 1.41
 -23 -3 -1 3.84 1.85
 23 -3 1 -3.31 -1.28
 23 3 1 3.84 -1.85
 25 -3 1 -0.95 -1.44
 -25 -3 -1 0.00 3.54
 25 3 1 0.00 -3.54
 27 -3 1 -1.66 0.17
 27 3 1 0.92 -3.85
 30 -4 -1 1.03 -1.15
 30 4 -1 -1.34 -2.73
 -28 -4 1 1.95 3.82
 28 -4 -1 -2.13 -4.06
 28 4 -1 1.95 -3.82
 -26 -4 1 0.20 1.15
 26 -4 -1 0.64 -1.14
 26 4 -1 0.20 -1.15
 -24 -4 1 -2.48 -0.38
 24 -4 -1 1.97 -0.74
 24 4 -1 -2.48 0.38
 24 4 -1 -2.48 0.38
 22 -4 -1 3.89 -0.85
 22 -4 -1 3.89 -0.85
 -22 -4 1 -3.75 -4.71
 22 4 -1 -3.75 4.71
 22 4 -1 -3.75 4.71
 20 -4 -1 4.84 -3.53
 -20 -4 1 -4.01 1.39
 20 -4 -1 4.84 -3.53
 20 4 -1 -4.01 -1.39
 20 4 -1 -4.01 -1.39
 18 -4 -1 8.98 -3.92
 18 -4 -1 8.98 -3.92
 -18 -4 1 -7.81 -2.15
 18 4 -1 -7.81 2.15
 18 4 -1 -7.81 2.15
 16 -4 -1 7.38 -2.22
 -16 -4 1 -6.57 3.90
 16 -4 -1 7.38 -2.22
 16 4 -1 -6.57 -3.90
 16 4 -1 -6.57 -3.90
 -14 -4 1 -0.54 5.89
 14 -4 -1 1.03 2.26
 14 -4 -1 1.03 2.26
 14 4 -1 -0.54 -5.89
 14 4 -1 -0.54 -5.89
 12 -4 -1 -1.46 0.50
 12 -4 -1 -1.46 0.50
 -12 -4 1 0.38 -2.22
 12 4 -1 0.38 2.22
 12 4 -1 0.38 2.22
 -10 -4 1 -4.68 -4.00
 10 -4 -1 4.27 -1.65
 10 4 -1 -4.68 4.00
 10 4 -1 -4.68 4.00
 8 -4 -1 11.79 -8.79
 -8 -4 1 -11.73 -10.47
 8 -4 -1 11.79 -8.79
 -8 4 1 11.79 8.79
 8 4 -1 -11.73 10.47
 8 4 -1 -11.73 10.47
 6 -4 -1 -3.09 1.36
 -6 -4 1 3.40 1.23
 6 4 -1 3.40 -1.23
 -6 4 1 -3.09 -1.36
 4 4 -1 -1.78 4.73
 -2 -4 1 36.16 14.47
 2 -4 -1 -36.41 12.63
 -2 -4 1 36.16 14.47
 -2 -4 1 36.16 14.47
 2 -4 -1 -36.41 12.63
 0 -4 -1 -49.53 -2.34
 0 -4 1 50.45 -0.25
 0 -4 1 50.45 -0.25
 0 4 -1 50.45 0.25
 0 4 -1 50.45 0.25
 0 4 1 -49.53 2.34
 2 -4 1 29.44 -2.76
 -2 -4 -1 -28.91 0.09
 -2 -4 -1 -28.91 0.09
 2 -4 1 29.44 -2.76
 -2 4 -1 29.44 2.76
 -2 4 -1 29.44 2.76
 2 4 1 -28.91 -0.09
 -4 -4 -1 -24.46 -7.21
 4 -4 1 22.75 -10.43
 4 -4 1 22.75 -10.43
 -4 4 -1 22.75 10.43
 -6 -4 -1 10.04 5.25
 6 -4 1 -10.26 7.68
 6 4 1 10.04 -5.25
 -6 4 -1 -10.26 -7.68
 8 -4 1 -7.97 4.37
 -8 -4 -1 7.31 2.18
 8 4 1 7.31 -2.18
 10 -4 1 -2.02 4.14
 10 -4 1 -2.02 4.14
 -10 -4 -1 2.10 6.28
 10 4 1 2.10 -6.28
 12 -4 1 4.28 2.66
 -12 -4 -1 -4.73 2.36
 12 -4 1 4.28 2.66
 12 4 1 -4.73 -2.36
 14 -4 1 1.84 0.19
 14 -4 1 1.84 0.19
 -14 -4 -1 -1.91 -1.53
 14 4 1 -1.91 1.53
 16 -4 1 -5.34 -1.44
 16 -4 1 -5.34 -1.44
 -16 -4 -1 4.48 -5.92
 16 4 1 4.48 5.92
 18 -4 1 -7.38 2.07
 18 -4 1 -7.38 2.07
 -18 -4 -1 5.16 -9.09
 18 4 1 5.16 9.09
 20 -4 1 -2.78 3.22
 20 -4 1 -2.78 3.22
 -20 -4 -1 2.09 2.24
 20 4 1 2.09 -2.24
 22 -4 1 -1.38 -0.38
 -22 -4 -1 1.22 1.35
 22 -4 1 -1.38 -0.38
 22 4 1 1.22 -1.35
 24 -4 1 -2.47 -0.79
 -24 -4 -1 2.22 2.53
 24 4 1 2.22 -2.53
 26 -4 1 0.06 1.49
 26 4 1 0.70 0.73
 28 -4 1 -0.77 -0.17
 28 4 1 1.30 2.49
 29 -5 -1 0.61 3.70
 29 5 -1 -1.06 3.64
 27 -5 -1 3.12 5.21
 -27 -5 1 -5.14 -1.11
 27 5 -1 -5.14 1.11
 -25 -5 1 2.05 1.49
 25 -5 -1 -2.61 -0.86
 25 -5 -1 -2.61 -0.86
 25 5 -1 2.05 -1.49
 -23 -5 1 4.31 -0.50
 23 -5 -1 -5.96 1.17
 23 -5 -1 -5.96 1.17
 23 5 -1 4.31 0.50
 21 -5 -1 -2.98 -0.13
 -21 -5 1 3.10 2.40
 21 -5 -1 -2.98 -0.13
 21 5 -1 3.10 -2.40
 19 -5 -1 -1.82 -4.40
 19 -5 -1 -1.82 -4.40
 -19 -5 1 0.99 0.65
 19 5 -1 0.99 -0.65
 19 5 -1 0.99 -0.65
 17 -5 -1 -1.60 2.14
 -17 -5 1 1.89 4.59
 17 -5 -1 -1.60 2.14
 17 5 -1 1.89 -4.59
 17 5 -1 1.89 -4.59
 15 -5 -1 -3.19 -5.34
 -15 -5 1 3.76 -3.08
 15 -5 -1 -3.19 -5.34
 15 5 -1 3.76 3.08
 15 5 -1 3.76 3.08
 -13 -5 1 -7.40 2.71
 13 -5 -1 8.87 -3.84
 13 -5 -1 8.87 -3.84
 13 5 -1 -7.40 -2.71
 -13 5 1 8.87 3.84
 13 5 -1 -7.40 -2.71
 11 -5 -1 16.57 -6.01
 -11 -5 1 -16.01 -6.81
 11 -5 -1 16.57 -6.01
 -11 5 1 16.57 6.01
 11 5 -1 -16.01 6.81
 11 5 -1 -16.01 6.81
 -9 -5 1 -9.11 -0.69
 9 -5 -1 9.35 8.40
 -9 5 1 9.35 -8.40
 9 5 -1 -9.11 0.69
 -7 -5 1 6.65 -3.54
 7 -5 -1 -6.40 2.52
 7 -5 -1 -6.40 2.52
 7 5 -1 6.65 3.54
 -7 5 1 -6.40 -2.52
 5 -5 -1 -45.46 7.31
 5 -5 -1 -45.46 7.31
 -5 -5 1 45.39 8.87
 5 5 -1 45.39 -8.87
 -5 5 1 -45.46 -7.31
 1 -5 -1 24.62 -4.04
 1 -5 -1 24.62 -4.04
 -1 -5 1 -25.66 0.15
 -1 -5 1 -25.66 0.15
 1 5 -1 -25.66 -0.15
 -1 5 1 24.62 4.04
 -1 -5 -1 39.82 0.32
 1 -5 1 -40.62 -3.13
 -1 5 -1 -40.62 3.13
 1 5 1 39.82 -0.32
 -1 5 -1 -40.62 3.13
 -3 -5 -1 -6.06 -6.08
 -3 -5 -1 -6.06 -6.08
 3 -5 1 7.39 6.51
 3 5 1 -6.06 6.08
 -3 5 -1 7.39 -6.51
 -3 5 -1 7.39 -6.51
 5 -5 1 12.51 3.02
 5 -5 1 12.51 3.02
 -5 -5 -1 -12.23 1.95
 -5 5 -1 12.51 -3.02
 7 -5 1 25.68 -8.50
 -7 -5 -1 -26.65 -3.17
 7 -5 1 25.68 -8.50
 7 5 1 -26.65 3.17
 -7 5 -1 25.68 8.50
 -9 -5 -1 -3.05 7.60
 9 -5 1 3.31 2.50
 9 5 1 -3.05 -7.60
 -9 5 -1 3.31 -2.50
 -11 -5 -1 10.74 -0.43
 11 -5 1 -10.58 -4.43
 11 -5 1 -10.58 -4.43
 11 5 1 10.74 0.43
 -13 -5 -1 6.65 4.89
 13 -5 1 -6.43 0.35
 13 -5 1 -6.43 0.35
 13 5 1 6.65 -4.89
 15 -5 1 -2.48 -2.52
 -15 -5 -1 2.60 -1.89
 15 -5 1 -2.48 -2.52
 15 5 1 2.60 1.89
 17 -5 1 3.70 6.37
 17 -5 1 3.70 6.37
 -17 -5 -1 -2.44 4.05
 17 5 1 -2.44 -4.05
 -19 -5 -1 0.39 0.55
 19 -5 1 0.64 -1.22
 19 -5 1 0.64 -1.22
 19 5 1 0.39 -0.55
 -21 -5 -1 0.72 3.25
 21 -5 1 0.55 0.07
 21 -5 1 0.55 0.07
 21 5 1 0.72 -3.25
 -23 -5 -1 -5.14 -1.36
 23 -5 1 5.37 2.34
 23 -5 1 5.37 2.34
 23 5 1 -5.14 1.36
 25 -5 1 2.95 -4.00
 -25 -5 -1 -1.94 -0.91
 25 5 1 -1.94 0.91
 27 -5 1 1.84 -3.48
 27 5 1 -2.01 -2.83
 28 -6 -1 -3.32 -4.52
 -28 -6 1 4.53 5.11
 28 6 -1 4.53 -5.11
 26 -6 -1 -5.50 -0.19
 26 -6 -1 -5.50 -0.19
 -26 -6 1 6.54 -0.62
 26 6 -1 6.54 0.62
 -24 -6 1 2.33 2.45
 24 -6 -1 -1.50 4.10
 24 -6 -1 -1.50 4.10
 24 6 -1 2.33 -2.45
 22 -6 -1 -2.22 -1.32
 -22 -6 1 3.10 0.52
 22 -6 -1 -2.22 -1.32
 22 6 -1 3.10 -0.52
 20 -6 -1 -4.23 5.71
 -20 -6 1 4.62 -1.24
 20 -6 -1 -4.23 5.71
 20 6 -1 4.62 1.24
 18 -6 -1 -7.22 4.00
 18 -6 -1 -7.22 4.00
 -18 -6 1 8.10 2.17
 18 6 -1 8.10 -2.17
 -18 6 1 -7.22 -4.00
 16 -6 -1 -1.33 -0.51
 -16 -6 1 0.68 -3.72
 16 -6 -1 -1.33 -0.51
 -16 6 1 -1.33 0.51
 16 6 -1 0.68 3.72
 -14 -6 1 -2.72 -6.75
 14 -6 -1 1.13 5.56
 14 -6 -1 1.13 5.56
 14 6 -1 -2.72 6.75
 -14 6 1 1.13 -5.56
 12 -6 -1 -10.95 2.50
 -12 -6 1 11.67 1.54
 12 -6 -1 -10.95 2.50
 12 6 -1 11.67 -1.54
 -12 6 1 -10.95 -2.50
 10 -6 -1 -24.80 -2.10
 -10 -6 1 24.72 4.78
 -10 6 1 -24.80 2.10
 10 6 -1 24.72 -4.78
 -8 -6 1 16.43 14.37
 8 -6 -1 -17.15 -6.13
 8 -6 -1 -17.15 -6.13
 -8 6 1 -17.15 6.13
 8 6 -1 16.43 -14.37
 6 -6 -1 9.56 3.26
 6 -6 -1 9.56 3.26
 -6 -6 1 -9.65 4.65
 6 6 -1 -9.65 -4.65
 -6 6 1 9.56 -3.26
 4 -6 -1 24.15 0.27
 -4 -6 1 -23.89 4.57
 4 -6 -1 24.15 0.27
 -4 6 1 24.15 -0.27
 2 -6 -1 -11.13 -2.22
 2 -6 -1 -11.13 -2.22
 -2 -6 1 12.17 -0.95
 -2 -6 1 12.17 -0.95
 2 6 -1 12.17 0.95
 -2 6 1 -11.13 2.22
 0 -6 1 27.39 -0.21
 0 -6 1 27.39 -0.21
 0 -6 -1 -26.93 -2.04
 0 6 -1 27.39 0.21
 0 6 1 -26.93 2.04
 2 -6 1 5.30 -4.89
 -2 -6 -1 -4.90 -1.93
 2 -6 1 5.30 -4.89
 -2 -6 -1 -4.90 -1.93
 -2 6 -1 5.30 4.89
 2 6 1 -4.90 1.93
 -2 6 -1 5.30 4.89
 4 -6 1 -8.54 -5.86
 -4 -6 -1 7.82 0.37
 4 -6 1 -8.54 -5.86
 4 6 1 7.82 -0.37
 -4 6 -1 -8.54 5.86
 -6 -6 -1 15.89 -5.21
 -6 -6 -1 15.89 -5.21
 6 -6 1 -15.08 6.01
 6 -6 1 -15.08 6.01
 -6 6 -1 -15.08 -6.01
 -8 -6 -1 5.82 -1.47
 8 -6 1 -5.98 4.36
 8 -6 1 -5.98 4.36
 -8 6 -1 -5.98 -4.36
 8 6 1 5.82 1.47
 -10 -6 -1 -5.41 -7.92
 10 -6 1 4.27 3.79
 10 -6 1 4.27 3.79
 10 6 1 -5.41 7.92
 -10 6 -1 4.27 -3.79
 -12 -6 -1 -0.99 -0.64
 12 -6 1 1.51 2.72
 12 -6 1 1.51 2.72
 12 6 1 -0.99 0.64
 -12 6 -1 1.51 -2.72
 -14 -6 -1 1.22 0.38
 14 -6 1 -1.98 6.48
 14 -6 1 -1.98 6.48
 -14 6 -1 -1.98 -6.48
 14 6 1 1.22 -0.38
 16 -6 1 -0.45 -1.04
 -16 -6 -1 -0.28 -0.32
 16 -6 1 -0.45 -1.04
 16 6 1 -0.28 0.32
 18 -6 1 2.84 -0.91
 18 -6 1 2.84 -0.91
 -18 -6 -1 -3.27 3.78
 18 6 1 -3.27 -3.78
 20 -6 1 5.89 3.43
 20 -6 1 5.89 3.43
 -20 -6 -1 -7.50 -2.87
 20 6 1 -7.50 2.87
 22 -6 1 0.09 -4.35
 22 -6 1 0.09 -4.35
 -22 -6 -1 -1.14 -4.88
 22 6 1 -1.14 4.88
 -24 -6 -1 1.99 0.35
 24 -6 1 -2.21 1.32
 24 6 1 1.99 -0.35
 26 -6 1 -0.42 3.59
 26 6 1 0.97 3.92
 27 -7 -1 3.19 0.70
 -27 -7 1 -3.36 -2.49
 27 7 -1 -3.36 2.49
 -25 -7 1 -6.08 -1.64
 25 -7 -1 5.60 -3.51
 25 -7 -1 5.60 -3.51
 25 7 -1 -6.08 1.64
 -25 7 1 5.60 3.51
 -23 -7 1 -4.10 -1.55
 23 -7 -1 4.74 -0.88
 23 -7 -1 4.74 -0.88
 23 7 -1 -4.10 1.55
 -23 7 1 4.74 0.88
 -21 -7 1 -5.62 1.01
 21 -7 -1 5.15 0.99
 21 -7 -1 5.15 0.99
 21 7 -1 -5.62 -1.01
 -21 7 1 5.15 -0.99
 -19 -7 1 -6.57 -2.23
 19 -7 -1 5.58 0.32
 19 -7 -1 5.58 0.32
 -19 7 1 5.58 -0.32
 19 7 -1 -6.57 2.23
 17 -7 -1 3.29 -2.06
 -17 -7 1 -3.79 -2.45
 17 -7 -1 3.29 -2.06
 17 7 -1 -3.79 2.45
 -17 7 1 3.29 2.06
 15 -7 -1 -3.09 -0.56
 -15 -7 1 3.94 11.91
 15 -7 -1 -3.09 -0.56
 -15 7 1 -3.09 0.56
 15 7 -1 3.94 -11.91
 -13 -7 1 5.48 1.50
 13 -7 -1 -5.28 -5.85
 13 -7 -1 -5.28 -5.85
 -13 7 1 -5.28 5.85
 13 7 -1 5.48 -1.50
 -11 -7 1 -2.17 6.95
 11 -7 -1 1.90 0.93
 11 -7 -1 1.90 0.93
 -11 7 1 1.90 -0.93
 11 7 -1 -2.17 -6.95
 9 -7 -1 5.71 5.51
 -9 -7 1 -4.69 -6.22
 -9 7 1 5.71 -5.51
 9 7 -1 -4.69 6.22
 7 -7 -1 -5.17 3.56
 7 -7 -1 -5.17 3.56
 -7 -7 1 5.93 -1.11
 -7 7 1 -5.17 -3.56
 -5 -7 1 15.62 -7.12
 5 -7 -1 -15.28 -3.32
 -5 -7 1 15.62 -7.12
 5 -7 -1 -15.28 -3.32
 -5 7 1 -15.28 3.32
 3 -7 -1 -12.45 -2.11
 3 -7 -1 -12.45 -2.11
 -3 -7 1 12.24 -3.06
 3 7 -1 12.24 3.06
 -3 7 1 -12.45 2.11
 -1 -7 1 -10.25 -4.43
 1 -7 -1 10.11 6.18
 -1 -7 1 -10.25 -4.43
 1 7 -1 -10.25 4.43
 -1 7 1 10.11 -6.18
 -1 -7 -1 -10.54 3.39
 1 -7 1 9.44 1.46
 1 -7 1 9.44 1.46
 -1 -7 -1 -10.54 3.39
 -1 7 -1 9.44 -1.46
 1 7 1 -10.54 -3.39
 3 -7 1 10.32 1.30
 3 -7 1 10.32 1.30
 -3 -7 -1 -11.17 3.42
 3 7 1 -11.17 -3.42
 -3 7 -1 10.32 -1.30
 5 -7 1 11.96 -4.60
 5 -7 1 11.96 -4.60
 -5 -7 -1 -12.33 -3.39
 -5 -7 -1 -12.33 -3.39
 -5 7 -1 11.96 4.60
 5 7 1 -12.33 3.39
 -7 -7 -1 -8.01 3.55
 7 -7 1 7.85 -5.28
 7 -7 1 7.85 -5.28
 -7 -7 -1 -8.01 3.55
 -7 7 -1 7.85 5.28
 7 7 1 -8.01 -3.55
 -9 -7 -1 -2.80 -2.72
 9 -7 1 2.99 -3.78
 9 -7 1 2.99 -3.78
 -9 -7 -1 -2.80 -2.72
 -9 7 -1 2.99 3.78
 11 -7 1 3.61 1.57
 -11 -7 -1 -4.94 7.38
 11 -7 1 3.61 1.57
 -11 7 -1 3.61 -1.57
 13 -7 1 9.52 -5.59
 -13 -7 -1 -9.64 -6.58
 13 -7 1 9.52 -5.59
 -13 7 -1 9.52 5.59
 13 7 1 -9.64 6.58
 15 -7 1 9.54 -2.14
 15 -7 1 9.54 -2.14
 -15 -7 -1 -8.45 3.45
 15 7 1 -8.45 -3.45
 -15 7 -1 9.54 2.14
 17 -7 1 0.81 -6.97
 17 -7 1 0.81 -6.97
 -17 -7 -1 -0.44 -4.48
 -17 7 -1 0.81 6.97
 17 7 1 -0.44 4.48
 -19 -7 -1 4.79 -3.58
 19 -7 1 -4.15 -5.86
 19 -7 1 -4.15 -5.86
 19 7 1 4.79 3.58
 -19 7 -1 -4.15 5.86
 -21 -7 -1 4.15 1.37
 21 -7 1 -3.39 0.98
 21 -7 1 -3.39 0.98
 -21 7 -1 -3.39 -0.98
 21 7 1 4.15 -1.37
 23 -7 1 -0.03 4.27
 -23 -7 -1 0.90 1.77
 23 -7 1 -0.03 4.27
 -23 7 -1 -0.03 -4.27
 23 7 1 0.90 -1.77
 -25 -7 -1 -2.96 0.33
 -25 7 -1 1.40 -1.36
 25 7 1 -2.96 -0.33
 27 7 1 -3.26 2.33
 -27 7 -1 1.08 -3.75
 -26 -8 1 2.84 6.14
 26 -8 -1 -2.30 -2.44
 26 8 -1 2.84 -6.14
 24 -8 -1 -2.95 -4.63
 -24 -8 1 3.34 5.55
 -24 8 1 -2.95 4.63
 24 8 -1 3.34 -5.55
 22 -8 -1 -1.58 -0.74
 22 -8 -1 -1.58 -0.74
 -22 -8 1 1.45 0.64
 22 8 -1 1.45 -0.64
 -22 8 1 -1.58 0.74
 20 -8 -1 -2.80 -2.42
 20 -8 -1 -2.80 -2.42
 -20 -8 1 2.62 2.69
 -20 8 1 -2.80 2.42
 20 8 -1 2.62 -2.69
 -18 -8 1 2.82 1.80
 18 -8 -1 -2.59 -3.20
 18 -8 -1 -2.59 -3.20
 18 8 -1 2.82 -1.80
 -18 8 1 -2.59 3.20
 16 -8 -1 -2.17 -0.69
 -16 -8 1 2.31 -2.70
 16 -8 -1 -2.17 -0.69
 16 8 -1 2.31 2.70
 -16 8 1 -2.17 0.69
 -14 -8 1 -1.04 -0.05
 14 -8 -1 1.58 -2.76
 14 -8 -1 1.58 -2.76
 -14 8 1 1.58 2.76
 14 8 -1 -1.04 0.05
 -12 -8 1 -1.50 2.62
 12 -8 -1 1.44 1.60
 12 -8 -1 1.44 1.60
 -12 8 1 1.44 -1.60
 12 8 -1 -1.50 -2.62
 -10 -8 1 -5.35 7.07
 10 -8 -1 5.12 2.77
 10 -8 -1 5.12 2.77
 -10 8 1 5.12 -2.77
 8 -8 -1 -12.10 -2.77
 -8 -8 1 11.33 0.91
 -8 -8 1 11.33 0.91
 8 -8 -1 -12.10 -2.77
 -8 8 1 -12.10 2.77
 6 -8 -1 -5.28 4.42
 -6 -8 1 4.55 0.89
 -6 -8 1 4.55 0.89
 6 -8 -1 -5.28 4.42
 6 8 -1 4.55 -0.89
 -6 8 1 -5.28 -4.42
 4 -8 -1 -10.75 0.78
 4 -8 -1 -10.75 0.78
 -4 -8 1 10.36 2.53
 -4 -8 1 10.36 2.53
 -4 8 1 -10.75 -0.78
 4 8 -1 10.36 -2.53
 -2 -8 1 4.13 -0.93
 2 -8 -1 -4.08 -1.12
 -2 -8 1 4.13 -0.93
 2 -8 -1 -4.08 -1.12
 2 8 -1 4.13 0.93
 -2 8 1 -4.08 1.12
 0 -8 1 -4.64 0.26
 0 -8 1 -4.64 0.26
 0 -8 -1 4.45 -2.65
 0 -8 -1 4.45 -2.65
 0 8 -1 -4.64 -0.26
 0 8 1 4.45 2.65
 -2 -8 -1 3.44 -3.91
 2 -8 1 -2.32 -2.25
 2 -8 1 -2.32 -2.25
 2 8 1 3.44 3.91
 -2 8 -1 -2.32 2.25
 4 -8 1 8.33 -5.63
 4 -8 1 8.33 -5.63
 -4 -8 -1 -8.30 0.55
 -4 -8 -1 -8.30 0.55
 -4 8 -1 8.33 5.63
 4 8 1 -8.30 -0.55
 6 -8 1 20.50 -1.64
 6 -8 1 20.50 -1.64
 -6 -8 -1 -20.63 -4.19
 -6 -8 -1 -20.63 -4.19
 6 8 1 -20.63 4.19
 -6 8 -1 20.50 1.64
 -8 -8 -1 -1.57 -13.82
 8 -8 1 1.27 -7.96
 8 -8 1 1.27 -7.96
 -8 -8 -1 -1.57 -13.82
 -8 8 -1 1.27 7.96
 8 8 1 -1.57 13.82
 -10 -8 -1 -3.93 -7.74
 -10 -8 -1 -3.93 -7.74
 10 -8 1 5.16 -1.26
 -10 8 -1 5.16 1.26
 12 -8 1 -4.13 4.35
 -12 -8 -1 4.25 -3.62
 -12 -8 -1 4.25 -3.62
 12 -8 1 -4.13 4.35
 -12 8 -1 -4.13 -4.35
 12 8 1 4.25 3.62
 14 -8 1 -6.81 3.59
 -14 -8 -1 6.47 0.01
 14 -8 1 -6.81 3.59
 -14 8 -1 -6.81 -3.59
 14 8 1 6.47 -0.01
 16 -8 1 -4.05 9.32
 16 -8 1 -4.05 9.32
 -16 -8 -1 3.76 -2.06
 16 8 1 3.76 2.06
 -16 8 -1 -4.05 -9.32
 -18 -8 -1 1.60 0.38
 18 -8 1 -0.63 6.69
 18 -8 1 -0.63 6.69
 -18 8 -1 -0.63 -6.69
 18 8 1 1.60 -0.38
 -20 -8 -1 1.13 1.57
 20 -8 1 -0.99 -0.12
 -20 8 -1 -0.99 0.12
 20 8 1 1.13 -1.57
 22 -8 1 -0.18 -0.86
 -22 -8 -1 -0.66 -3.85
 -22 8 -1 -0.18 0.86
 22 8 1 -0.66 3.85
 -24 -8 -1 0.60 -3.85
 -24 8 -1 -0.90 2.96
 24 8 1 0.60 3.85
 26 8 1 5.46 -2.18
 -26 8 -1 -3.70 1.77
 25 -9 -1 2.14 5.30
 -25 -9 1 -3.36 -7.44
 25 9 -1 -3.36 7.44
 -23 -9 1 -3.35 -1.40
 23 -9 -1 1.56 4.30
 -23 9 1 1.56 -4.30
 23 9 -1 -3.35 1.40
 -21 -9 1 2.70 3.35
 21 -9 -1 -2.83 -5.71
 -21 9 1 -2.83 5.71
 21 9 -1 2.70 -3.35
 19 -9 -1 0.86 0.10
 -19 -9 1 -0.82 2.06
 -19 9 1 0.86 -0.10
 19 9 -1 -0.82 -2.06
 17 -9 -1 -2.24 -2.64
 -17 -9 1 1.83 3.87
 17 9 -1 1.83 -3.87
 -17 9 1 -2.24 2.64
 15 -9 -1 -1.89 0.90
 15 -9 -1 -1.89 0.90
 -15 -9 1 1.30 -0.10
 15 9 -1 1.30 0.10
 -15 9 1 -1.89 -0.90
 -13 -9 1 5.41 -5.53
 13 -9 -1 -5.60 -1.42
 13 -9 -1 -5.60 -1.42
 -13 9 1 -5.60 1.42
 13 9 -1 5.41 5.53
 11 -9 -1 -10.13 -3.46
 -11 -9 1 10.75 -5.05
 -11 -9 1 10.75 -5.05
 11 -9 -1 -10.13 -3.46
 -11 9 1 -10.13 3.46
 11 9 -1 10.75 5.05
 9 -9 -1 0.10 1.05
 -9 -9 1 0.09 -1.47
 -9 -9 1 0.09 -1.47
 -9 9 1 0.10 -1.05
 -7 -9 1 -8.38 2.38
 -7 -9 1 -8.38 2.38
 7 -9 -1 7.77 3.17
 7 -9 -1 7.77 3.17
 7 9 -1 -8.38 -2.38
 -7 9 1 7.77 -3.17
 -5 -9 1 -10.54 -4.07
 5 -9 -1 10.31 -1.63
 -5 -9 1 -10.54 -4.07
 5 -9 -1 10.31 -1.63
 -5 9 1 10.31 1.63
 5 9 -1 -10.54 4.07
 3 -9 -1 7.67 0.86
 -3 -9 1 -9.07 -2.15
 3 9 -1 -9.07 2.15
 -3 9 1 7.67 -0.86
 -1 -9 1 8.77 3.90
 1 -9 -1 -8.29 -1.23
 -1 -9 1 8.77 3.90
 1 9 -1 8.77 -3.90
 -1 9 1 -8.29 1.23
 1 -9 1 7.40 2.37
 -1 -9 -1 -6.08 6.10
 1 -9 1 7.40 2.37
 1 9 1 -6.08 -6.10
 -1 9 -1 7.40 -2.37
 3 -9 1 -1.97 4.45
 3 -9 1 -1.97 4.45
 -3 -9 -1 2.39 2.65
 -3 -9 -1 2.39 2.65
 3 9 1 2.39 -2.65
 -3 9 -1 -1.97 -4.45
 -5 -9 -1 17.62 -0.06
 -5 -9 -1 17.62 -0.06
 5 -9 1 -16.16 0.70
 5 -9 1 -16.16 0.70
 5 9 1 17.62 0.06
 -5 9 -1 -16.16 -0.70
 -7 -9 -1 12.22 7.22
 7 -9 1 -11.85 3.32
 7 -9 1 -11.85 3.32
 -7 -9 -1 12.22 7.22
 7 9 1 12.22 -7.22
 -7 9 -1 -11.85 -3.32
 -9 -9 -1 -1.88 9.66
 9 -9 1 1.82 2.99
 9 -9 1 1.82 2.99
 -9 -9 -1 -1.88 9.66
 -9 9 -1 1.82 -2.99
 9 9 1 -1.88 -9.66
 -11 -9 -1 -1.59 2.66
 11 -9 1 1.73 -3.87
 -11 -9 -1 -1.59 2.66
 11 9 1 -1.59 -2.66
 -11 9 -1 1.73 3.87
 -13 -9 -1 -5.23 -0.40
 13 -9 1 4.90 -2.69
 -13 -9 -1 -5.23 -0.40
 -13 9 -1 4.90 2.69
 13 9 1 -5.23 0.40
 15 -9 1 4.27 -1.30
 -15 -9 -1 -3.66 0.45
 -15 -9 -1 -3.66 0.45
 15 9 1 -3.66 -0.45
 -15 9 -1 4.27 1.30
 -17 -9 -1 -1.93 1.44
 17 -9 1 1.43 -3.26
 -17 -9 -1 -1.93 1.44
 17 9 1 -1.93 -1.44
 -17 9 -1 1.43 3.26
 19 -9 1 3.87 6.65
 -19 -9 -1 -4.36 -4.45
 19 9 1 -4.36 4.45
 -19 9 -1 3.87 -6.65
 -21 -9 -1 0.95 0.57
 21 -9 1 -0.24 1.13
 21 9 1 0.95 -0.57
 -21 9 -1 -0.24 -1.13
 -23 -9 -1 2.35 4.51
 23 9 1 2.35 -4.51
 -23 9 -1 -1.42 -2.84
 25 9 1 -0.07 -0.71
 -25 9 -1 -0.05 -0.33
 24 -10 -1 -0.04 -2.37
 -24 -10 1 1.03 4.22
 24 10 -1 1.03 -4.22
 22 -10 -1 3.05 -1.65
 -22 -10 1 -2.68 -0.35
 22 10 -1 -2.68 0.35
 -22 10 1 3.05 1.65
 -20 -10 1 2.24 0.65
 20 -10 -1 -1.74 -0.03
 20 10 -1 2.24 -0.65
 -20 10 1 -1.74 0.03
 18 -10 -1 1.40 -2.02
 -18 -10 1 -1.19 1.56
 18 10 -1 -1.19 -1.56
 -18 10 1 1.40 2.02
 16 -10 -1 2.39 3.06
 -16 -10 1 -0.89 2.68
 -16 -10 1 -0.89 2.68
 16 10 -1 -0.89 -2.68
 -16 10 1 2.39 -3.06
 -14 -10 1 -1.11 6.32
 14 -10 -1 2.26 2.84
 -14 -10 1 -1.11 6.32
 -14 10 1 2.26 -2.84
 14 10 -1 -1.11 -6.32
 -12 -10 1 -6.92 9.10
 -12 -10 1 -6.92 9.10
 12 -10 -1 6.52 8.26
 -12 10 1 6.52 -8.26
 12 10 -1 -6.92 -9.10
 -10 -10 1 -5.27 -3.26
 10 -10 -1 4.78 0.56
 -10 -10 1 -5.27 -3.26
 -10 10 1 4.78 -0.56
 10 10 -1 -5.27 3.26
 8 -10 -1 -2.89 -2.24
 -8 -10 1 2.79 -3.59
 8 -10 -1 -2.89 -2.24
 -8 -10 1 2.79 -3.59
 -8 10 1 -2.89 2.24
 8 10 -1 2.79 3.59
 6 -10 -1 -1.84 -5.05
 6 -10 -1 -1.84 -5.05
 -6 -10 1 2.05 -3.33
 -6 -10 1 2.05 -3.33
 6 10 -1 2.05 3.33
 -6 10 1 -1.84 5.05
 4 -10 -1 -3.60 -2.25
 4 -10 -1 -3.60 -2.25
 -4 -10 1 3.35 -0.52
 -4 -10 1 3.35 -0.52
 -4 10 1 -3.60 2.25
 4 10 -1 3.35 0.52
 -2 -10 1 -0.24 -1.31
 2 -10 -1 0.42 1.65
 2 -10 -1 0.42 1.65
 -2 -10 1 -0.24 -1.31
 2 10 -1 -0.24 1.31
 -2 10 1 0.42 -1.65
 0 -10 -1 3.48 -5.26
 0 -10 1 -5.78 -7.28
 0 -10 1 -5.78 -7.28
 0 -10 -1 3.48 -5.26
 0 10 -1 -5.78 7.28
 0 10 1 3.48 5.26
 2 -10 1 -3.56 -0.31
 -2 -10 -1 3.11 -0.80
 -2 -10 -1 3.11 -0.80
 2 10 1 3.11 0.80
 -2 10 -1 -3.56 0.31
 4 -10 1 2.67 4.22
 -4 -10 -1 -3.46 3.43
 -4 -10 -1 -3.46 3.43
 4 10 1 -3.46 -3.43
 -4 10 -1 2.67 -4.22
 -6 -10 -1 -8.75 1.61
 6 -10 1 8.45 0.75
 -6 -10 -1 -8.75 1.61
 -6 10 -1 8.45 -0.75
 6 10 1 -8.75 -1.61
 -8 -10 -1 -2.32 -0.54
 -8 -10 -1 -2.32 -0.54
 8 -10 1 1.59 1.81
 -8 10 -1 1.59 -1.81
 8 10 1 -2.32 0.54
 -10 -10 -1 0.01 -7.59
 10 -10 1 -0.65 -0.89
 -10 -10 -1 0.01 -7.59
 -10 10 -1 -0.65 0.89
 10 10 1 0.01 7.59
 12 -10 1 -0.01 2.62
 -12 -10 -1 -0.32 -0.76
 -12 -10 -1 -0.32 -0.76
 12 10 1 -0.32 0.76
 -12 10 -1 -0.01 -2.62
 -14 -10 -1 1.41 -2.09
 -14 -10 -1 1.41 -2.09
 14 -10 1 -2.30 -0.15
 -14 10 -1 -2.30 0.15
 14 10 1 1.41 2.09
 -16 -10 -1 1.56 -5.52
 -16 -10 -1 1.56 -5.52
 16 -10 1 -2.19 3.70
 16 10 1 1.56 5.52
 -16 10 -1 -2.19 -3.70
 -18 -10 -1 -1.23 -1.36
 -18 -10 -1 -1.23 -1.36
 18 -10 1 0.93 1.34
 -18 10 -1 0.93 -1.34
 18 10 1 -1.23 1.36
 20 -10 1 -2.16 1.35
 -20 -10 -1 2.83 -0.83
 -20 -10 -1 2.83 -0.83
 20 10 1 2.83 0.83
 -20 10 -1 -2.16 -1.35
 -22 -10 -1 -2.29 -4.46
 -22 -10 -1 -2.29 -4.46
 22 -10 1 2.14 -0.75
 22 10 1 -2.29 4.46
 -22 10 -1 2.14 0.75
 -24 -10 -1 -1.66 -1.83
 -24 -10 -1 -1.66 -1.83
 -24 10 -1 1.20 0.01
 24 10 1 -1.66 1.83
 -23 -11 1 3.48 -3.68
 -23 -11 1 3.48 -3.68
 23 -11 -1 -3.89 -0.91
 23 11 -1 3.48 3.68
 21 -11 -1 0.87 5.30
 -21 -11 1 -1.56 -7.15
 -21 -11 1 -1.56 -7.15
 -21 11 1 0.87 -5.30
 21 11 -1 -1.56 7.15
 -19 -11 1 -2.31 -7.00
 -19 -11 1 -2.31 -7.00
 19 -11 -1 2.58 3.34
 -19 11 1 2.58 -3.34
 19 11 -1 -2.31 7.00
 17 -11 -1 -0.95 1.78
 -17 -11 1 1.49 -3.32
 -17 -11 1 1.49 -3.32
 17 11 -1 1.49 3.32
 -17 11 1 -0.95 -1.78
 15 -11 -1 0.86 -7.23
 -15 -11 1 -1.41 -7.00
 -15 -11 1 -1.41 -7.00
 15 11 -1 -1.41 7.00
 -15 11 1 0.86 7.23
 -13 -11 1 -0.06 -4.04
 13 -11 -1 0.43 -4.75
 -13 -11 1 -0.06 -4.04
 -13 11 1 0.43 4.75
 13 11 -1 -0.06 4.04
 11 -11 -1 -3.28 -9.01
 -11 -11 1 3.68 -4.57
 -11 -11 1 3.68 -4.57
 11 11 -1 3.68 4.57
 -11 11 1 -3.28 9.01
 -9 -11 1 0.73 -0.45
 9 -11 -1 -0.66 -2.68
 -9 -11 1 0.73 -0.45
 -9 11 1 -0.66 2.68
 9 11 -1 0.73 0.45
 -7 -11 1 -0.87 -0.80
 7 -11 -1 0.57 -2.38
 -7 -11 1 -0.87 -0.80
 7 11 -1 -0.87 0.80
 -7 11 1 0.57 2.38
 5 -11 -1 -3.17 5.10
 -5 -11 1 3.70 1.38
 -5 -11 1 3.70 1.38
 5 11 -1 3.70 -1.38
 -5 11 1 -3.17 -5.10
 3 -11 -1 -1.91 2.65
 -3 -11 1 2.75 0.98
 -3 11 1 -1.91 -2.65
 3 11 -1 2.75 -0.98
 1 -11 -1 0.46 5.53
 -1 -11 1 0.93 2.51
 -1 11 1 0.46 -5.53
 1 11 -1 0.93 -2.51
 1 -11 1 4.31 -0.14
 -1 -11 -1 -3.79 3.12
 -1 -11 -1 -3.79 3.12
 1 11 1 -3.79 -3.12
 -1 11 -1 4.31 0.14
 -3 -11 -1 -3.45 -2.81
 -3 -11 -1 -3.45 -2.81
 3 -11 1 3.41 -6.63
 3 11 1 -3.45 2.81
 -3 11 -1 3.41 6.63
 -5 -11 -1 1.67 -0.19
 -5 -11 -1 1.67 -0.19
 5 -11 1 -1.35 -0.61
 5 11 1 1.67 0.19
 -5 11 -1 -1.35 0.61
 -7 -11 -1 0.26 3.45
 7 -11 1 0.06 2.42
 -7 -11 -1 0.26 3.45
 7 11 1 0.26 -3.45
 -7 11 -1 0.06 -2.42
 -9 -11 -1 0.57 4.07
 9 -11 1 -0.17 2.81
 -9 -11 -1 0.57 4.07
 -9 11 -1 -0.17 -2.81
 9 11 1 0.57 -4.07
 11 -11 1 -4.61 -2.02
 -11 -11 -1 3.97 1.39
 -11 -11 -1 3.97 1.39
 11 11 1 3.97 -1.39
 -11 11 -1 -4.61 2.02
 -13 -11 -1 2.35 -0.41
 13 -11 1 -2.07 1.27
 -13 -11 -1 2.35 -0.41
 13 11 1 2.35 0.41
 -13 11 -1 -2.07 -1.27
 -15 -11 -1 -0.91 -1.04
 15 -11 1 1.00 -3.00
 -15 -11 -1 -0.91 -1.04
 -15 11 -1 1.00 3.00
 15 11 1 -0.91 1.04
 -17 -11 -1 0.52 5.08
 -17 -11 -1 0.52 5.08
 17 -11 1 0.36 -2.49
 -17 11 -1 0.36 2.49
 17 11 1 0.52 -5.08
 -19 -11 -1 -0.03 5.70
 -19 -11 -1 -0.03 5.70
 19 -11 1 0.12 -5.38
 19 11 1 -0.03 -5.70
 -19 11 -1 0.12 5.38
 -21 -11 -1 -1.89 3.49
 -21 -11 -1 -1.89 3.49
 21 -11 1 1.68 0.77
 -21 11 -1 1.68 -0.77
 21 11 1 -1.89 -3.49
 -23 -11 -1 2.85 5.06
 -23 -11 -1 2.85 5.06
 23 11 1 2.85 -5.06
 -23 11 -1 -1.63 0.99
 -22 -12 1 0.92 2.48
 22 -12 -1 -0.09 -0.88
 -22 -12 1 0.92 2.48
 22 12 -1 0.92 -2.48
 -20 -12 1 1.07 8.41
 -20 -12 1 1.07 8.41
 20 -12 -1 -0.71 -6.53
 20 12 -1 1.07 -8.41
 -20 12 1 -0.71 6.53
 -18 -12 1 1.80 0.18
 -18 -12 1 1.80 0.18
 18 -12 -1 -2.21 -3.10
 18 12 -1 1.80 -0.18
 -18 12 1 -2.21 3.10
 -16 -12 1 -3.25 2.48
 16 -12 -1 1.96 4.74
 -16 -12 1 -3.25 2.48
 16 12 -1 -3.25 -2.48
 -16 12 1 1.96 -4.74
 -14 -12 1 -2.11 0.89
 14 -12 -1 2.00 7.53
 -14 -12 1 -2.11 0.89
 -14 12 1 2.00 -7.53
 14 12 -1 -2.11 -0.89
 -12 -12 1 -2.79 -3.64
 12 -12 -1 2.72 4.39
 -12 12 1 2.72 -4.39
 12 12 -1 -2.79 3.64
 10 -12 -1 0.42 3.10
 -10 -12 1 -0.23 0.11
 10 12 -1 -0.23 -0.11
 -10 12 1 0.42 -3.10
 -8 -12 1 -0.05 -0.38
 8 -12 -1 0.16 -0.52
 -8 12 1 0.16 0.52
 8 12 -1 -0.05 0.38
 6 -12 -1 -0.71 -2.22
 -6 -12 1 1.00 -0.49
 -6 12 1 -0.71 2.22
 6 12 -1 1.00 0.49
 4 -12 -1 1.09 -3.57
 -4 -12 1 -1.76 1.72
 4 12 -1 -1.76 -1.72
 -4 12 1 1.09 3.57
 2 -12 -1 -1.77 -6.36
 -2 -12 1 0.53 -4.03
 -2 12 1 -1.77 6.36
 2 12 -1 0.53 4.03
 0 -12 -1 -2.22 -2.82
 0 -12 1 2.02 0.45
 0 12 -1 2.02 -0.45
 0 12 1 -2.22 2.82
 -2 -12 -1 0.08 -2.13
 2 -12 1 0.11 0.74
 2 12 1 0.08 2.13
 -2 12 -1 0.11 -0.74
 4 -12 1 -0.90 2.67
 -4 -12 -1 0.63 1.02
 4 12 1 0.63 -1.02
 -4 12 -1 -0.90 -2.67
 6 -12 1 -1.52 -1.44
 -6 -12 -1 1.57 -3.47
 -6 12 -1 -1.52 1.44
 6 12 1 1.57 3.47
 -8 -12 -1 -0.11 -2.03
 -8 -12 -1 -0.11 -2.03
 8 -12 1 0.76 -3.57
 -8 12 -1 0.76 3.57
 8 12 1 -0.11 2.03
 -10 -12 -1 -0.50 2.96
 -10 -12 -1 -0.50 2.96
 10 -12 1 0.82 1.02
 10 12 1 -0.50 -2.96
 -10 12 -1 0.82 -1.02
 12 -12 1 0.67 -1.86
 -12 -12 -1 -0.49 1.07
 -12 -12 -1 -0.49 1.07
 -12 12 -1 0.67 1.86
 12 12 1 -0.49 -1.07
 14 -12 1 -2.42 -3.40
 -14 -12 -1 2.41 3.70
 -14 -12 -1 2.41 3.70
 14 12 1 2.41 -3.70
 -14 12 -1 -2.42 3.40
 16 -12 1 -0.85 -1.57
 -16 -12 -1 -0.15 3.41
 -16 -12 -1 -0.15 3.41
 16 12 1 -0.15 -3.41
 -16 12 -1 -0.85 1.57
 -18 -12 -1 1.56 -5.37
 18 -12 1 -2.20 1.10
 -18 -12 -1 1.56 -5.37
 18 12 1 1.56 5.37
 -18 12 -1 -2.20 -1.10
 -20 -12 -1 -1.24 1.50
 20 -12 1 0.28 -1.25
 -20 -12 -1 -1.24 1.50
 -20 12 -1 0.28 1.25
 20 12 1 -1.24 -1.50
 -21 -13 1 -3.60 -4.47
 21 -13 -1 3.05 3.91
 21 13 -1 -3.60 4.47
 -19 -13 1 -4.26 -6.23
 19 -13 -1 3.58 7.12
 19 13 -1 -4.26 6.23
 -19 13 1 3.58 -7.12
 -17 -13 1 -1.97 -0.91
 17 -13 -1 3.08 2.26
 17 13 -1 -1.97 0.91
 -17 13 1 3.08 -2.26
 15 -13 -1 -2.18 -1.98
 -15 -13 1 2.53 0.10
 15 13 -1 2.53 -0.10
 -15 13 1 -2.18 1.98
 13 -13 -1 -1.04 -2.53
 -13 -13 1 1.41 -1.38
 -13 13 1 -1.04 2.53
 13 13 -1 1.41 1.38
 11 -13 -1 -1.40 0.52
 -11 -13 1 1.43 0.91
 11 13 -1 1.43 -0.91
 -11 13 1 -1.40 -0.52
 -9 -13 1 -3.00 1.19
 9 -13 -1 3.41 4.16
 -9 13 1 3.41 -4.16
 9 13 -1 -3.00 -1.19
 7 -13 -1 1.66 5.04
 -7 -13 1 -1.52 0.36
 -7 13 1 1.66 -5.04
 7 13 -1 -1.52 -0.36
 5 -13 -1 -0.23 0.06
 -5 -13 1 0.04 0.14
 -5 13 1 -0.23 -0.06
 5 13 -1 0.04 -0.14
 -3 -13 1 2.05 -0.37
 3 -13 -1 -1.54 1.52
 -3 13 1 -1.54 -1.52
 3 13 -1 2.05 0.37
 1 -13 -1 0.01 0.58
 -1 -13 1 0.34 3.91
 -1 13 1 0.01 -0.58
 1 13 -1 0.34 -3.91
 1 -13 1 -1.06 3.76
 -1 -13 -1 0.95 2.32
 1 13 1 0.95 -2.32
 -1 13 -1 -1.06 -3.76
 3 -13 1 1.47 2.48
 -3 -13 -1 -1.49 -0.76
 -3 13 -1 1.47 -2.48
 3 13 1 -1.49 0.76
 5 -13 1 2.37 -1.80
 -5 -13 -1 -2.27 1.68
 5 13 1 -2.27 -1.68
 -5 13 -1 2.37 1.80
 7 -13 1 -1.58 -1.77
 -7 -13 -1 0.29 0.46
 7 13 1 0.29 -0.46
 -7 13 -1 -1.58 1.77
 9 -13 1 -1.97 -2.15
 -9 -13 -1 1.05 1.07
 9 13 1 1.05 -1.07
 -9 13 -1 -1.97 2.15
 11 -13 1 -1.12 -2.34
 -11 -13 -1 0.55 1.75
 11 13 1 0.55 -1.75
 -11 13 -1 -1.12 2.34
 -13 -13 -1 -3.14 -0.20
 13 -13 1 4.20 3.16
 13 13 1 -3.14 0.20
 -13 13 -1 4.20 -3.16
 -15 -13 -1 -0.77 -0.30
 15 -13 1 1.44 2.82
 15 13 1 -0.77 0.30
 -15 13 -1 1.44 -2.82
 17 -13 1 -2.47 1.01
 -17 -13 -1 3.25 3.22
 -17 13 -1 -2.47 -1.01
 17 13 1 3.25 -3.22
 -19 -13 -1 3.67 -0.20
 19 -13 1 -3.39 0.79
 19 13 1 3.67 0.20
 -19 13 -1 -3.39 -0.79
 18 -14 -1 0.26 -2.88
 -18 -14 1 -0.44 4.30
 18 14 -1 -0.44 -4.30
 16 -14 -1 -0.02 -3.99
 -16 -14 1 0.24 -7.06
 16 14 -1 0.24 7.06
 -16 14 1 -0.02 3.99
 14 -14 -1 -0.05 -0.65
 -14 -14 1 0.59 -0.63
 -14 14 1 -0.05 0.65
 14 14 -1 0.59 0.63
 12 -14 -1 -0.40 1.30
 -12 -14 1 0.18 0.15
 -12 14 1 -0.40 -1.30
 12 14 -1 0.18 -0.15
 10 -14 -1 -2.77 2.47
 -10 -14 1 2.51 3.58
 10 14 -1 2.51 -3.58
 -10 14 1 -2.77 -2.47
 8 -14 -1 -7.04 -4.62
 -8 -14 1 7.26 1.32
 8 14 -1 7.26 -1.32
 -8 14 1 -7.04 4.62
 6 -14 -1 -4.18 -1.97
 -6 -14 1 4.34 -0.54
 -6 14 1 -4.18 1.97
 6 14 -1 4.34 0.54
 4 -14 -1 0.03 0.24
 -4 -14 1 0.33 -0.53
 -4 14 1 0.03 -0.24
 4 14 -1 0.33 0.53
 2 -14 -1 1.35 2.01
 -2 -14 1 -1.40 1.39
 2 14 -1 -1.40 -1.39
 -2 14 1 1.35 -2.01
 0 -14 -1 -0.71 -2.42
 0 -14 1 0.12 -5.21
 0 14 1 -0.71 2.42
 0 14 -1 0.12 5.21
 -2 -14 -1 0.38 -0.54
 2 -14 1 -0.38 -2.93
 -2 14 -1 -0.38 2.93
 2 14 1 0.38 0.54
 -4 -14 -1 -0.08 0.32
 4 -14 1 -0.03 -0.02
 4 14 1 -0.08 -0.32
 -4 14 -1 -0.03 0.02
 -6 -14 -1 -1.74 -2.71
 6 -14 1 1.59 1.91
 -6 14 -1 1.59 -1.91
 6 14 1 -1.74 2.71
 -8 -14 -1 -2.14 -4.62
 8 -14 1 3.12 -2.55
 8 14 1 -2.14 4.62
 -8 14 -1 3.12 2.55
 -10 -14 -1 -3.33 -2.94
 10 -14 1 4.43 0.95
 10 14 1 -3.33 2.94
 -10 14 -1 4.43 -0.95
 -12 -14 -1 -0.31 -1.03
 12 -14 1 -0.32 -1.93
 -12 14 -1 -0.32 1.93
 12 14 1 -0.31 1.03
 14 -14 1 -3.16 -1.14
 -14 -14 -1 1.61 4.04
 -14 14 -1 -3.16 1.14
 14 14 1 1.61 -4.04
 16 -14 1 0.42 -1.50
 -16 14 -1 0.42 1.50
 16 14 1 -1.13 2.44
 -15 -15 1 -0.46 4.39
 15 -15 -1 -0.37 3.24
 -15 15 1 -0.37 -3.24
 15 15 -1 -0.46 -4.39
 -13 -15 1 -1.20 2.91
 13 -15 -1 0.16 -0.32
 -13 15 1 0.16 0.32
 13 15 -1 -1.20 -2.91
 11 -15 -1 1.80 -6.55
 -11 -15 1 -1.64 1.05
 11 15 -1 -1.64 -1.05
 -11 15 1 1.80 6.55
 9 -15 -1 6.28 -2.81
 -9 -15 1 -5.17 -3.59
 -9 15 1 6.28 2.81
 9 15 -1 -5.17 3.59
 7 -15 -1 5.14 3.10
 -7 -15 1 -4.51 2.48
 -7 15 1 5.14 -3.10
 7 15 -1 -4.51 -2.48
 -5 -15 1 -1.65 4.07
 5 -15 -1 3.37 3.56
 -5 15 1 3.37 -3.56
 5 15 -1 -1.65 -4.07
 -3 -15 1 3.03 -2.20
 3 -15 -1 -1.93 -3.45
 -3 15 1 -1.93 3.45
 3 15 -1 3.03 2.20
 -1 -15 1 4.64 1.80
 1 -15 -1 -3.82 -0.31
 1 15 -1 4.64 -1.80
 -1 15 1 -3.82 0.31
 1 -15 1 1.41 3.67
 -1 -15 -1 -1.76 2.91
 -1 15 -1 1.41 -3.67
 1 15 1 -1.76 -2.91
 -3 -15 -1 -2.70 -1.24
 3 -15 1 1.16 -1.29
 -3 15 -1 1.16 1.29
 3 15 1 -2.70 1.24
 5 -15 1 0.66 -1.85
 -5 -15 -1 -1.18 -0.52
 5 15 1 -1.18 0.52
 -5 15 -1 0.66 1.85
 -7 -15 -1 2.31 4.98
 7 -15 1 -3.50 4.75
 7 15 1 2.31 -4.98
 -7 15 -1 -3.50 -4.75
 9 -15 1 -3.04 6.52
 -9 -15 -1 3.01 0.89
 9 15 1 3.01 -0.89
 -9 15 -1 -3.04 -6.52
 -11 -15 -1 2.46 1.70
 11 -15 1 -1.92 5.06
 -11 15 -1 -1.92 -5.06
 13 -15 1 1.43 2.78
 -13 -15 -1 -0.83 -1.21
 13 15 1 -0.83 1.21
 -13 15 -1 1.43 -2.78
 15 -15 1 -2.31 0.78
 -15 -15 -1 3.24 -1.79
 -15 15 -1 -2.31 -0.78
 15 15 1 3.24 1.79
 12 -16 -1 3.05 3.20
 -12 -16 1 -0.89 -1.35
 12 16 -1 -0.89 1.35
 -12 16 1 3.05 -3.20
 10 -16 -1 -1.04 2.72
 -10 -16 1 1.82 1.27
 -10 16 1 -1.04 -2.72
 10 16 -1 1.82 -1.27
 -8 -16 1 1.85 1.22
 8 -16 -1 -1.02 -0.15
 8 16 -1 1.85 -1.22
 -8 16 1 -1.02 0.15
 6 -16 -1 -0.61 -4.93
 -6 -16 1 0.62 -4.11
 -6 16 1 -0.61 4.93
 6 16 -1 0.62 4.11
 -4 -16 1 -1.69 -1.82
 4 -16 -1 1.44 -0.80
 -4 16 1 1.44 0.80
 4 16 -1 -1.69 1.82
 2 -16 -1 3.94 6.28
 -2 -16 1 -5.27 -2.00
 2 16 -1 -5.27 2.00
 -2 16 1 3.94 -6.28
 0 -16 1 -4.05 -6.18
 0 -16 -1 4.66 1.31
 0 16 1 4.66 -1.31
 0 16 -1 -4.05 6.18
 2 -16 1 -3.46 -0.91
 -2 -16 -1 3.15 0.32
 -2 16 -1 -3.46 0.91
 2 16 1 3.15 -0.32
 -4 -16 -1 3.61 1.17
 4 -16 1 -3.66 2.14
 -4 16 -1 -3.66 -2.14
 4 16 1 3.61 -1.17
 6 -16 1 -0.08 0.01
 -6 -16 -1 -0.48 -2.07
 -6 16 -1 -0.08 -0.01
 6 16 1 -0.48 2.07
 8 -16 1 0.74 -2.90
 -8 -16 -1 -1.98 -1.66
 8 16 1 -1.98 1.66
 -8 16 -1 0.74 2.90
 10 -16 1 -2.15 -5.96
 -10 -16 -1 -0.73 -1.19
 10 16 1 -0.73 1.19
 -10 16 -1 -2.15 5.96
 12 -16 1 -3.36 -2.63
 7 -17 -1 -0.02 2.47
 -7 -17 1 0.41 2.10
 7 17 -1 0.41 -2.10
 -7 17 1 -0.02 -2.47
 -5 -17 1 0.79 3.06
 5 -17 -1 -1.11 2.35
 -5 17 1 -1.11 -2.35
 5 17 -1 0.79 -3.06
 3 -17 -1 -4.54 -1.33
 -3 -17 1 4.98 4.32
 -3 17 1 -4.54 1.33
 3 17 -1 4.98 -4.32
 1 -17 -1 -4.75 -7.34
 -1 -17 1 4.69 6.64
 -1 17 1 -4.75 7.34
 1 17 -1 4.69 -6.64
 -1 -17 -1 -7.20 -3.30
 1 -17 1 7.26 2.64
 -1 17 -1 7.26 -2.64
 1 17 1 -7.20 3.30
 -3 -17 -1 -3.03 -2.02
 3 -17 1 3.96 0.29
 -3 17 -1 3.96 -0.29
 3 17 1 -3.03 2.02
 5 -17 1 0.62 -1.55
 -5 -17 -1 -0.66 -0.67
 5 17 1 -0.66 0.67
 -5 17 -1 0.62 1.55
 -7 -17 -1 0.30 -0.08
 7 -17 1 0.57 -0.78
 7 17 1 0.30 0.08
 30 0 -2 -0.30 1.52
 28 0 -2 -2.63 -1.54
 26 0 -2 -2.73 -2.38
 24 0 -2 -1.75 -3.00
 22 0 -2 -3.01 -3.39
 20 0 -2 2.95 1.14
 20 0 -2 2.95 1.14
 18 0 -2 3.93 -1.52
 18 0 -2 3.93 -1.52
 16 0 -2 13.25 -0.15
 16 0 -2 13.25 -0.15
 14 0 -2 13.70 3.06
 14 0 -2 13.70 3.06
 12 0 -2 -17.52 2.12
 12 0 -2 -17.52 2.12
 8 0 -2 37.54 -16.67
 8 0 -2 37.54 -16.67
 8 0 -2 37.54 -16.67
 6 0 -2 107.35 -5.48
 6 0 -2 107.35 -5.48
 6 0 -2 107.35 -5.48
 -2 0 2 -309.72 -0.24
 -2 0 2 -309.72 -0.24
 2 0 -2 -309.72 0.24
 0 0 2 -105.81 10.82
 0 0 -2 -105.81 -10.82
 -2 0 -2 -168.77 -30.11
 -4 0 -2 -63.56 -7.71
 4 0 2 -63.56 7.71
 6 0 2 5.41 -3.71
 6 0 2 5.41 -3.71
 8 0 2 4.94 -2.34
 8 0 2 4.94 -2.34
 10 0 2 -21.83 1.77
 10 0 2 -21.83 1.77
 12 0 2 -22.23 2.52
 12 0 2 -22.23 2.52
 14 0 2 -8.49 1.76
 14 0 2 -8.49 1.76
 16 0 2 -1.35 1.55
 16 0 2 -1.35 1.55
 18 0 2 -3.51 3.54
 20 0 2 5.46 4.26
 31 -1 -2 -1.02 -0.28
 31 1 -2 -0.88 -0.44
 29 -1 -2 0.12 -0.76
 29 1 -2 1.17 0.05
 27 -1 -2 -1.43 1.97
 27 1 -2 0.61 1.47
 25 -1 -2 -1.39 2.25
 25 1 -2 0.22 1.53
 25 1 -2 0.22 1.53
 23 -1 -2 -0.03 3.83
 23 1 -2 0.71 -0.88
 23 1 -2 0.71 -0.88
 21 -1 -2 -0.43 3.17
 21 1 -2 0.19 -3.67
 21 1 -2 0.19 -3.67
 19 -1 -2 -2.43 -2.00
 19 1 -2 -2.74 1.01
 19 1 -2 -2.74 1.01
 17 -1 -2 -4.59 3.20
 17 1 -2 -3.77 0.00
 15 -1 -2 -19.12 -0.10
 15 -1 -2 -19.12 -0.10
 15 1 -2 -19.66 1.61
 13 -1 -2 -4.55 3.09
 13 -1 -2 -4.55 3.09
 13 1 -2 -3.82 -2.09
 11 -1 -2 19.48 1.48
 11 1 -2 19.21 -3.20
 9 -1 -2 6.92 12.28
 9 -1 -2 6.92 12.28
 9 1 -2 7.04 11.12
 7 -1 -2 -78.17 8.54
 7 -1 -2 -78.17 8.54
 7 1 -2 -76.75 1.88
 5 -1 -2 -105.71 8.79
 5 -1 -2 -105.71 8.79
 5 1 -2 -104.44 6.21
 5 1 -2 -104.44 6.21
 3 -1 -2 51.69 -2.27
 -3 -1 2 54.82 0.10
 -3 1 2 51.69 2.27
 3 1 -2 54.82 -0.10
 3 1 -2 54.82 -0.10
 -3 1 2 51.69 2.27
 -1 -1 2 78.97 -16.53
 -1 -1 2 78.97 -16.53
 1 -1 -2 79.71 8.23
 1 -1 -2 79.71 8.23
 -1 1 2 79.71 -8.23
 1 1 -2 78.97 16.53
 1 1 -2 78.97 16.53
 1 1 -2 78.97 16.53
 -1 1 2 79.71 -8.23
 -1 1 2 79.71 -8.23
 -1 -1 -2 11.89 -1.55
 1 -1 2 12.13 -2.15
 -1 -1 -2 11.89 -1.55
 1 1 2 11.89 1.55
 1 1 2 11.89 1.55
 -1 1 -2 12.13 2.15
 3 -1 2 45.64 -7.16
 -3 -1 -2 46.20 6.48
 3 -1 2 45.64 -7.16
 -3 1 -2 45.64 7.16
 5 -1 2 9.06 7.32
 5 -1 2 9.06 7.32
 5 1 2 6.99 12.61
 9 -1 2 0.18 -1.26
 9 -1 2 0.18 -1.26
 9 1 2 -0.46 3.64
 9 1 2 -0.46 3.64
 11 -1 2 8.89 -3.17
 11 1 2 8.03 -2.98
 11 1 2 8.03 -2.98
 13 -1 2 7.06 1.29
 13 1 2 7.35 -0.96
 13 1 2 7.35 -0.96
 15 -1 2 -1.64 -2.02
 15 1 2 -1.23 3.30
 15 1 2 -1.23 3.30
 17 -1 2 3.20 -2.66
 17 1 2 3.78 -0.63
 17 1 2 3.78 -0.63
 19 -1 2 -0.78 -5.97
 19 1 2 -1.27 -0.85
 19 1 2 -1.27 -0.85
 21 -1 2 -4.27 -3.75
 21 1 2 -3.83 -2.07
 23 -1 2 -4.71 -0.42
 -30 -2 2 1.09 0.91
 30 -2 -2 1.49 -1.84
 30 2 -2 1.09 -0.91
 28 -2 -2 1.36 -2.57
 28 2 -2 0.72 2.50
 28 2 -2 0.72 2.50
 26 -2 -2 2.80 -4.31
 26 2 -2 1.30 0.14
 26 2 -2 1.30 0.14
 24 -2 -2 -0.36 -2.52
 24 2 -2 -1.33 1.12
 24 2 -2 -1.33 1.12
 22 -2 -2 -1.82 -6.20
 22 2 -2 -1.70 8.40
 22 2 -2 -1.70 8.40
 20 -2 -2 -5.26 -3.48
 20 2 -2 -5.04 3.19
 20 2 -2 -5.04 3.19
 18 -2 -2 -9.46 2.39
 18 -2 -2 -9.46 2.39
 18 2 -2 -9.19 2.65
 18 2 -2 -9.19 2.65
 16 -2 -2 -5.51 2.06
 16 -2 -2 -5.51 2.06
 16 2 -2 -5.38 -1.11
 16 2 -2 -5.38 -1.11
 14 -2 -2 -3.23 -4.04
 14 -2 -2 -3.23 -4.04
 14 2 -2 -3.12 3.52
 14 2 -2 -3.12 3.52
 12 -2 -2 -10.54 0.28
 12 -2 -2 -10.54 0.28
 12 2 -2 -10.33 3.31
 12 2 -2 -10.33 3.31
 10 2 -2 -28.58 1.13
 8 -2 -2 -12.18 2.41
 8 -2 -2 -12.18 2.41
 8 2 -2 -12.34 3.96
 8 2 -2 -12.34 3.96
 6 -2 -2 23.18 10.56
 6 -2 -2 23.18 10.56
 6 2 -2 18.23 19.26
 6 2 -2 18.23 19.26
 4 -2 -2 -47.47 11.20
 -4 -2 2 -54.76 -29.06
 4 -2 -2 -47.47 11.20
 -4 2 2 -47.47 -11.20
 4 2 -2 -54.76 29.06
 4 2 -2 -54.76 29.06
 2 -2 -2 39.13 -14.32
 2 -2 -2 39.13 -14.32
 -2 -2 2 36.62 15.14
 -2 -2 2 36.62 15.14
 -2 2 2 39.13 14.32
 2 2 -2 36.62 -15.14
 2 2 -2 36.62 -15.14
 0 -2 -2 -0.14 -19.18
 0 -2 -2 -0.14 -19.18
 0 -2 2 -0.41 7.53
 0 2 -2 -0.41 -7.53
 0 2 -2 -0.41 -7.53
 0 2 2 -0.14 19.18
 2 -2 2 71.48 -12.37
 -2 -2 -2 71.66 10.87
 -2 -2 -2 71.66 10.87
 2 -2 2 71.48 -12.37
 -2 2 -2 71.48 12.37
 -4 -2 -2 -11.97 4.78
 4 -2 2 -13.13 -5.40
 4 -2 2 -13.13 -5.40
 4 2 2 -11.97 -4.78
 6 -2 2 -12.09 3.98
 6 -2 2 -12.09 3.98
 -6 -2 -2 -12.34 0.53
 8 -2 2 -2.95 5.83
 8 -2 2 -2.95 5.83
 -8 -2 -2 -2.47 0.55
 8 2 2 -2.47 -0.55
 10 -2 2 -1.77 3.66
 -10 -2 -2 -1.21 -0.27
 10 2 2 -1.21 0.27
 12 -2 2 2.80 7.44
 12 -2 2 2.80 7.44
 -12 -2 -2 3.05 0.14
 12 2 2 3.05 -0.14
 14 -2 2 3.01 1.39
 14 -2 2 3.01 1.39
 14 2 2 2.68 -0.48
 -16 -2 -2 -1.78 2.62
 16 -2 2 -1.77 -0.52
 16 2 2 -1.78 -2.62
 -18 -2 -2 -1.47 -0.78
 18 -2 2 -1.63 1.77
 18 2 2 -1.47 0.78
 20 -2 2 -0.85 -2.21
 -20 -2 -2 -0.68 -0.75
 20 2 2 -0.68 0.75
 -22 -2 -2 0.95 -5.17
 22 -2 2 1.15 -3.03
 22 2 2 0.95 5.17
 24 -2 2 1.61 -0.36
 24 2 2 1.58 4.21
 31 -3 -2 -1.09 1.47
 31 3 -2 -0.97 -0.89
 -29 -3 2 -4.53 1.06
 29 -3 -2 -4.66 0.76
 29 3 -2 -4.53 -1.06
 29 3 -2 -4.53 -1.06
 -27 -3 2 -3.05 4.14
 27 -3 -2 -2.42 -0.79
 27 3 -2 -3.05 -4.14
 27 3 -2 -3.05 -4.14
 -25 -3 2 -1.10 -3.29
 25 -3 -2 -1.32 -3.59
 25 3 -2 -1.10 3.29
 25 3 -2 -1.10 3.29
 -23 -3 2 0.16 3.09
 23 -3 -2 0.97 -1.36
 23 3 -2 0.16 -3.09
 23 3 -2 0.16 -3.09
 21 -3 -2 2.08 2.62
 21 -3 -2 2.08 2.62
 21 3 -2 2.62 -3.90
 21 3 -2 2.62 -3.90
 19 -3 -2 7.89 3.73
 19 -3 -2 7.89 3.73
 19 3 -2 8.66 -6.66
 19 3 -2 8.66 -6.66
 17 -3 -2 15.18 -6.28
 17 -3 -2 15.18 -6.28
 17 3 -2 16.76 -2.44
 17 3 -2 16.76 -2.44
 15 -3 -2 20.06 9.79
 15 -3 -2 20.06 9.79
 15 3 -2 21.17 -13.19
 15 3 -2 21.17 -13.19
 13 -3 -2 4.93 8.39
 -13 -3 2 5.27 10.77
 13 -3 -2 4.93 8.39
 13 3 -2 5.27 -10.77
 13 3 -2 5.27 -10.77
 11 -3 -2 -9.54 2.98
 11 -3 -2 -9.54 2.98
 -11 -3 2 -9.92 2.43
 11 3 -2 -9.92 -2.43
 11 3 -2 -9.92 -2.43
 9 -3 -2 -11.30 -5.51
 -9 -3 2 -11.75 3.05
 9 -3 -2 -11.30 -5.51
 9 3 -2 -11.75 -3.05
 9 3 -2 -11.75 -3.05
 -7 -3 2 6.75 6.77
 7 -3 -2 6.02 -7.44
 7 -3 -2 6.02 -7.44
 7 3 -2 6.75 -6.77
 -7 3 2 6.02 7.44
 7 3 -2 6.75 -6.77
 5 -3 -2 68.39 -44.02
 5 -3 -2 68.39 -44.02
 -5 3 2 68.39 44.02
 5 3 -2 77.28 -54.50
 5 3 -2 77.28 -54.50
 -3 -3 2 47.62 8.32
 3 -3 -2 42.56 -8.40
 -3 -3 2 47.62 8.32
 3 3 -2 47.62 -8.32
 -3 3 2 42.56 8.40
 3 3 -2 47.62 -8.32
 -1 -3 2 -20.19 -11.85
 1 -3 -2 -21.19 5.85
 1 -3 -2 -21.19 5.85
 -1 3 2 -21.19 -5.85
 1 3 -2 -20.19 11.85
 1 -3 2 -47.10 -6.01
 -1 -3 -2 -47.80 5.44
 -1 -3 -2 -47.80 5.44
 1 3 2 -47.80 -5.44
 -3 -3 -2 -53.15 -22.92
 3 -3 2 -50.74 22.62
 -3 -3 -2 -53.15 -22.92
 3 -3 2 -50.74 22.62
 -3 3 -2 -50.74 -22.62
 -3 3 -2 -50.74 -22.62
 5 -3 2 3.91 -3.63
 5 -3 2 3.91 -3.63
 -5 -3 -2 5.49 5.95
 7 -3 2 7.09 -3.57
 7 -3 2 7.09 -3.57
 -7 -3 -2 7.13 -0.19
 7 3 2 7.13 0.19
 -9 -3 -2 0.97 -0.76
 9 -3 2 1.48 2.22
 9 -3 2 1.48 2.22
 9 3 2 0.97 0.76
 -11 -3 -2 -4.22 -0.96
 11 -3 2 -3.16 -1.97
 11 -3 2 -3.16 -1.97
 11 3 2 -4.22 0.96
 13 -3 2 -7.09 -9.39
 13 -3 2 -7.09 -9.39
 -13 -3 -2 -6.01 2.34
 13 3 2 -6.01 -2.34
 -15 -3 -2 -0.71 4.94
 15 -3 2 -1.26 3.21
 15 -3 2 -1.26 3.21
 15 3 2 -0.71 -4.94
 17 -3 2 -2.14 -0.25
 -17 -3 -2 -1.78 -1.64
 17 -3 2 -2.14 -0.25
 17 3 2 -1.78 1.64
 19 -3 2 -3.88 2.58
 -19 -3 -2 -3.69 -1.01
 19 3 2 -3.69 1.01
 21 -3 2 -0.27 5.82
 -21 -3 -2 -0.77 -0.40
 21 3 2 -0.77 0.40
 -23 -3 -2 1.72 6.38
 23 -3 2 3.00 -0.72
 23 3 2 1.72 -6.38
 25 3 2 -0.60 -0.80
 27 3 2 -0.14 0.12
 30 -4 -2 0.75 -2.17
 -30 -4 2 0.94 -2.27
 30 4 -2 0.94 2.27
 28 -4 -2 6.18 0.09
 -28 -4 2 7.06 -5.21
 28 4 -2 7.06 5.21
 -26 -4 2 3.75 -3.07
 26 -4 -2 3.96 0.83
 26 4 -2 3.75 3.07
 26 4 -2 3.75 3.07
 24 -4 -2 2.41 5.87
 24 -4 -2 2.41 5.87
 -24 -4 2 4.00 5.15
 24 4 -2 4.00 -5.15
 24 4 -2 4.00 -5.15
 22 -4 -2 1.92 4.96
 22 -4 -2 1.92 4.96
 -22 -4 2 0.81 -0.61
 22 4 -2 0.81 0.61
 22 4 -2 0.81 0.61
 -20 -4 2 1.72 0.30
 20 -4 -2 1.58 -2.94
 20 -4 -2 1.58 -2.94
 20 4 -2 1.72 -0.30
 20 4 -2 1.72 -0.30
 -18 -4 2 -2.73 2.62
 18 -4 -2 -1.83 2.77
 18 -4 -2 -1.83 2.77
 18 4 -2 -2.73 -2.62
 18 4 -2 -2.73 -2.62
 -16 -4 2 -13.32 -7.02
 16 -4 -2 -12.66 -5.66
 16 -4 -2 -12.66 -5.66
 16 4 -2 -13.32 7.02
 16 4 -2 -13.32 7.02
 14 -4 -2 -2.14 -15.69
 14 -4 -2 -2.14 -15.69
 -14 -4 2 -3.42 -16.46
 14 4 -2 -3.42 16.46
 14 4 -2 -3.42 16.46
 12 -4 -2 21.26 -7.38
 12 -4 -2 21.26 -7.38
 -12 -4 2 21.86 -5.89
 12 4 -2 21.86 5.89
 12 4 -2 21.86 5.89
 -10 -4 2 45.55 -0.76
 10 -4 -2 44.83 7.45
 10 4 -2 45.55 0.76
 -10 4 2 44.83 -7.45
 10 4 -2 45.55 0.76
 8 -4 -2 32.77 -3.33
 -8 -4 2 32.75 10.25
 8 -4 -2 32.77 -3.33
 8 4 -2 32.75 -10.25
 8 4 -2 32.75 -10.25
 -8 4 2 32.77 3.33
 -4 -4 2 -20.19 -27.72
 4 -4 -2 -12.67 21.51
 4 -4 -2 -12.67 21.51
 4 4 -2 -20.19 27.72
 -4 4 2 -12.67 -21.51
 4 4 -2 -20.19 27.72
 -2 -4 2 0.65 -7.18
 2 -4 -2 3.44 0.66
 -2 -4 2 0.65 -7.18
 -2 4 2 3.44 -0.66
 0 -4 -2 74.17 4.16
 0 -4 2 73.75 -0.26
 0 -4 -2 74.17 4.16
 0 4 2 74.17 -4.16
 -2 -4 -2 32.25 13.16
 -2 -4 -2 32.25 13.16
 2 -4 2 31.14 -18.79
 2 -4 2 31.14 -18.79
 -2 4 -2 31.14 18.79
 -2 4 -2 31.14 18.79
 2 4 2 32.25 -13.16
 -4 -4 -2 12.46 7.36
 4 -4 2 13.09 -12.71
 -4 -4 -2 12.46 7.36
 4 -4 2 13.09 -12.71
 -4 4 -2 13.09 12.71
 6 -4 2 -14.51 14.27
 -6 -4 -2 -15.90 -16.91
 6 -4 2 -14.51 14.27
 -6 4 -2 -14.51 -14.27
 6 4 2 -15.90 16.91
 8 -4 2 -1.75 5.40
 -8 -4 -2 -1.52 -3.77
 8 4 2 -1.52 3.77
 10 -4 2 11.20 1.23
 10 -4 2 11.20 1.23
 -10 -4 -2 11.70 2.48
 10 4 2 11.70 -2.48
 12 -4 2 3.95 5.84
 12 -4 2 3.95 5.84
 -12 -4 -2 3.59 7.17
 12 4 2 3.59 -7.17
 -14 -4 -2 1.97 0.27
 14 -4 2 2.25 6.18
 14 -4 2 2.25 6.18
 14 4 2 1.97 -0.27
 16 -4 2 2.42 -0.01
 -16 -4 -2 2.17 -1.10
 16 -4 2 2.42 -0.01
 16 4 2 2.17 1.10
 -18 -4 -2 10.07 4.13
 18 -4 2 10.89 5.36
 18 -4 2 10.89 5.36
 18 4 2 10.07 -4.13
 20 -4 2 10.75 -0.21
 20 -4 2 10.75 -0.21
 -20 -4 -2 10.50 9.33
 20 4 2 10.50 -9.33
 -22 -4 -2 -0.36 -0.19
 22 -4 2 0.16 0.06
 22 4 2 -0.36 0.19
 24 -4 2 -2.91 5.42
 24 4 2 -2.80 1.35
 26 4 2 -4.93 -0.78
 28 4 2 -0.71 0.27
 29 -5 -2 0.83 4.36
 -29 -5 2 0.23 3.65
 29 5 -2 0.23 -3.65
 27 -5 -2 -1.49 5.59
 -27 -5 2 -1.82 6.80
 27 5 -2 -1.82 -6.80
 -25 -5 2 0.00 -2.19
 25 -5 -2 1.01 2.44
 25 -5 -2 1.01 2.44
 25 5 -2 0.00 2.19
 23 -5 -2 1.45 -5.63
 -23 -5 2 1.46 -3.37
 23 -5 -2 1.45 -5.63
 23 5 -2 1.46 3.37
 23 5 -2 1.46 3.37
 -21 -5 2 2.22 0.20
 21 -5 -2 1.86 0.96
 21 -5 -2 1.86 0.96
 21 5 -2 2.22 -0.20
 21 5 -2 2.22 -0.20
 -19 -5 2 -3.18 -8.42
 19 -5 -2 -2.61 3.52
 19 -5 -2 -2.61 3.52
 19 5 -2 -3.18 8.42
 19 5 -2 -3.18 8.42
 -17 -5 2 0.19 0.41
 17 -5 -2 -0.30 3.19
 17 -5 -2 -0.30 3.19
 17 5 -2 0.19 -0.41
 17 5 -2 0.19 -0.41
 -15 -5 2 4.83 13.34
 15 -5 -2 2.83 12.12
 15 -5 -2 2.83 12.12
 15 5 -2 4.83 -13.34
 15 5 -2 4.83 -13.34
 13 -5 -2 -2.53 9.19
 -13 -5 2 -2.55 7.83
 13 -5 -2 -2.53 9.19
 13 5 -2 -2.55 -7.83
 13 5 -2 -2.55 -7.83
 -13 5 2 -2.53 -9.19
 11 -5 -2 -12.18 -4.43
 -11 -5 2 -12.10 7.20
 11 -5 -2 -12.18 -4.43
 11 5 -2 -12.10 -7.20
 11 5 -2 -12.10 -7.20
 -11 5 2 -12.18 4.43
 -9 -5 2 -9.72 -6.82
 9 -5 -2 -9.24 -5.15
 9 5 -2 -9.72 6.82
 -9 5 2 -9.24 5.15
 9 5 -2 -9.72 6.82
 -7 -5 2 14.84 -2.79
 7 -5 -2 15.39 2.53
 7 -5 -2 15.39 2.53
 7 5 -2 14.84 2.79
 7 5 -2 14.84 2.79
 -7 5 2 15.39 -2.53
 5 -5 -2 17.51 -2.13
 5 -5 -2 17.51 -2.13
 5 5 -2 19.40 -3.16
 -5 5 2 17.51 2.13
 -3 -5 2 19.17 13.68
 1 -5 -2 -3.96 2.54
 -1 -5 -2 -2.49 -3.07
 -1 -5 -2 -2.49 -3.07
 1 5 2 -2.49 3.07
 -1 5 -2 -3.04 -1.20
 3 -5 2 30.22 -2.02
 -3 -5 -2 29.82 3.20
 -3 5 -2 30.22 2.02
 3 5 2 29.82 -3.20
 -3 5 -2 30.22 2.02
 5 -5 2 28.10 -15.30
 5 -5 2 28.10 -15.30
 -5 -5 -2 27.95 16.54
 -5 -5 -2 27.95 16.54
 -5 5 -2 28.10 15.30
 5 5 2 27.95 -16.54
 -7 -5 -2 18.16 17.89
 7 -5 2 18.28 -16.73
 7 -5 2 18.28 -16.73
 -7 5 -2 18.28 16.73
 9 -5 2 -3.69 -3.66
 -9 -5 -2 -2.73 -4.18
 -9 5 -2 -3.69 3.66
 9 5 2 -2.73 4.18
 11 -5 2 -2.39 0.65
 -11 -5 -2 0.61 -8.84
 11 -5 2 -2.39 0.65
 11 5 2 0.61 8.84
 13 -5 2 5.19 -6.40
 13 -5 2 5.19 -6.40
 -13 -5 -2 5.92 -5.82
 13 5 2 5.92 5.82
 -15 -5 -2 5.47 2.93
 15 -5 2 5.98 -4.09
 15 -5 2 5.98 -4.09
 15 5 2 5.47 -2.93
 17 -5 2 -2.63 -8.43
 -17 -5 -2 -1.67 8.25
 17 -5 2 -2.63 -8.43
 17 5 2 -1.67 -8.25
 19 -5 2 -7.98 -6.89
 -19 -5 -2 -8.06 -6.47
 19 -5 2 -7.98 -6.89
 19 5 2 -8.06 6.47
 21 -5 2 -2.89 1.30
 21 -5 2 -2.89 1.30
 -21 -5 -2 -2.69 -5.25
 21 5 2 -2.69 5.25
 23 -5 2 4.26 -0.18
 -23 -5 -2 3.77 0.60
 23 5 2 3.77 -0.60
 25 -5 2 5.36 -0.37
 25 5 2 6.09 0.83
 27 5 2 4.34 -2.22
 28 -6 -2 -1.27 -4.42
 28 -6 -2 -1.27 -4.42
 -28 -6 2 -1.50 -2.00
 28 6 -2 -1.50 2.00
 -26 -6 2 0.31 2.22
 26 -6 -2 -0.87 -0.97
 26 -6 -2 -0.87 -0.97
 26 6 -2 0.31 -2.22
 24 -6 -2 1.40 2.32
 24 -6 -2 1.40 2.32
 -24 -6 2 0.76 4.79
 24 6 -2 0.76 -4.79
 22 -6 -2 0.57 1.49
 22 -6 -2 0.57 1.49
 -22 -6 2 0.65 1.41
 22 6 -2 0.65 -1.41
 20 -6 -2 3.21 -2.22
 20 -6 -2 3.21 -2.22
 -20 -6 2 3.34 4.36
 20 6 -2 3.34 -4.36
 -20 6 2 3.21 2.22
 18 -6 -2 6.13 -6.67
 -18 -6 2 6.34 9.45
 18 -6 -2 6.13 -6.67
 18 6 -2 6.34 -9.45
 18 6 -2 6.34 -9.45
 -18 6 2 6.13 6.67
 16 -6 -2 8.65 0.42
 16 -6 -2 8.65 0.42
 16 6 -2 7.23 5.49
 16 6 -2 7.23 5.49
 -16 6 2 8.65 -0.42
 14 -6 -2 2.64 -3.19
 14 -6 -2 2.64 -3.19
 -14 -6 2 2.42 3.72
 14 6 -2 2.42 -3.72
 -14 6 2 2.64 3.19
 14 6 -2 2.42 -3.72
 12 -6 -2 -1.34 3.76
 12 -6 -2 -1.34 3.76
 -12 -6 2 -1.18 -2.57
 -12 6 2 -1.34 -3.76
 12 6 -2 -1.18 2.57
 12 6 -2 -1.18 2.57
 10 -6 -2 0.28 0.13
 10 -6 -2 0.28 0.13
 -10 -6 2 -0.48 6.64
 10 6 -2 -0.48 -6.64
 -10 6 2 0.28 -0.13
 8 -6 -2 -5.11 -3.85
 8 -6 -2 -5.11 -3.85
 -8 -6 2 -4.94 3.88
 8 6 -2 -4.94 -3.88
 -8 6 2 -5.11 3.85
 6 -6 -2 16.99 -8.06
 6 -6 -2 16.99 -8.06
 6 6 -2 16.74 -8.22
 -6 6 2 16.99 8.06
 -4 -6 2 4.89 -6.26
 4 -6 -2 4.64 -1.49
 -4 -6 2 4.89 -6.26
 4 -6 -2 4.64 -1.49
 -4 6 2 4.64 1.49
 4 6 -2 4.89 6.26
 -2 -6 2 -2.38 0.10
 2 -6 -2 -2.23 4.40
 -2 -6 2 -2.38 0.10
 -2 6 2 -2.23 -4.40
 0 -6 -2 -16.71 -2.36
 0 -6 -2 -16.71 -2.36
 0 -6 2 -16.09 0.78
 0 6 2 -16.71 2.36
 0 6 -2 -16.09 -0.78
 2 -6 2 -7.19 2.98
 -2 -6 -2 -7.96 5.23
 -2 -6 -2 -7.96 5.23
 2 -6 2 -7.19 2.98
 -2 6 -2 -7.19 -2.98
 2 6 2 -7.96 -5.23
 -2 6 -2 -7.19 -2.98
 -4 -6 -2 -7.24 -7.33
 4 -6 2 -7.43 4.90
 4 -6 2 -7.43 4.90
 -4 -6 -2 -7.24 -7.33
 4 6 2 -7.24 7.33
 -4 6 -2 -7.43 -4.90
 6 -6 2 12.79 1.23
 6 -6 2 12.79 1.23
 -6 -6 -2 13.27 0.82
 -6 -6 -2 13.27 0.82
 -6 6 -2 12.79 -1.23
 6 6 2 13.27 -0.82
 8 -6 2 8.03 1.23
 -8 -6 -2 6.92 2.90
 8 -6 2 8.03 1.23
 -8 -6 -2 6.92 2.90
 -8 6 -2 8.03 -1.23
 -10 -6 -2 2.71 18.26
 10 -6 2 6.39 -6.89
 10 -6 2 6.39 -6.89
 -10 6 -2 6.39 6.89
 -12 -6 -2 -4.30 1.37
 12 -6 2 -1.27 7.53
 12 -6 2 -1.27 7.53
 12 6 2 -4.30 -1.37
 -12 6 -2 -1.27 -7.53
 14 -6 2 -5.92 3.07
 14 -6 2 -5.92 3.07
 -14 -6 -2 -6.28 2.69
 14 6 2 -6.28 -2.69
 -14 6 -2 -5.92 -3.07
 -16 -6 -2 -1.35 -12.03
 16 -6 2 -0.67 11.73
 16 -6 2 -0.67 11.73
 16 6 2 -1.35 12.03
 18 -6 2 -0.64 6.65
 -18 -6 -2 -1.15 -3.37
 18 -6 2 -0.64 6.65
 18 6 2 -1.15 3.37
 20 -6 2 -1.16 1.06
 20 -6 2 -1.16 1.06
 -20 -6 -2 -0.74 3.32
 20 6 2 -0.74 -3.32
 -22 -6 -2 1.10 5.33
 22 -6 2 -1.44 -1.34
 22 6 2 1.10 -5.33
 24 -6 2 -1.88 -2.33
 24 6 2 -0.90 -3.74
 26 6 2 -0.64 -0.06
 -29 -7 2 0.60 3.07
 29 7 -2 0.60 -3.07
 -27 -7 2 -0.29 -2.62
 27 -7 -2 0.49 1.30
 27 -7 -2 0.49 1.30
 27 7 -2 -0.29 2.62
 -25 -7 2 -2.94 -3.54
 25 -7 -2 -2.25 -4.24
 25 -7 -2 -2.25 -4.24
 25 7 -2 -2.94 3.54
 -25 7 2 -2.25 4.24
 23 -7 -2 -1.88 -0.28
 23 -7 -2 -1.88 -0.28
 -23 -7 2 -1.75 0.43
 23 7 -2 -1.75 -0.43
 -23 7 2 -1.88 0.28
 21 -7 -2 -0.93 -1.59
 -21 -7 2 -1.20 1.41
 21 -7 -2 -0.93 -1.59
 -21 7 2 -0.93 1.59
 21 7 -2 -1.20 -1.41
 19 -7 -2 3.01 2.74
 19 -7 -2 3.01 2.74
 -19 -7 2 2.58 -0.60
 -19 7 2 3.01 -2.74
 19 7 -2 2.58 0.60
 17 -7 -2 0.30 3.95
 17 -7 -2 0.30 3.95
 -17 -7 2 -0.23 -2.20
 -17 7 2 0.30 -3.95
 17 7 -2 -0.23 2.20
 15 -7 -2 -1.78 -3.71
 15 -7 -2 -1.78 -3.71
 -15 -7 2 -2.21 -2.85
 -15 7 2 -1.78 3.71
 15 7 -2 -2.21 2.85
 13 -7 -2 4.67 -2.26
 -13 -7 2 4.61 -1.64
 13 -7 -2 4.67 -2.26
 13 7 -2 4.61 1.64
 -13 7 2 4.67 2.26
 -11 -7 2 15.65 0.18
 11 -7 -2 16.06 -4.60
 11 -7 -2 16.06 -4.60
 -11 7 2 16.06 4.60
 11 7 -2 15.65 -0.18
 9 -7 -2 12.16 -0.64
 -9 -7 2 11.86 3.90
 -9 7 2 12.16 0.64
 9 7 -2 11.86 -3.90
 -7 -7 2 5.62 -6.91
 7 -7 -2 6.25 4.71
 7 -7 -2 6.25 4.71
 -7 7 2 6.25 -4.71
 7 7 -2 5.62 6.91
 -5 -7 2 -23.61 -2.46
 5 -7 -2 -23.06 4.34
 5 -7 -2 -23.06 4.34
 -5 7 2 -23.06 -4.34
 3 -7 -2 -3.06 2.97
 3 -7 -2 -3.06 2.97
 -3 -7 2 -3.54 1.09
 -3 -7 2 -3.54 1.09
 -3 7 2 -3.06 -2.97
 3 7 -2 -3.54 -1.09
 1 -7 -2 10.62 -0.59
 -1 -7 2 10.64 0.60
 -1 -7 2 10.64 0.60
 1 -7 -2 10.62 -0.59
 -1 -7 2 10.64 0.60
 1 7 -2 10.64 -0.60
 -1 7 2 10.62 0.59
 1 -7 2 11.12 2.64
 -1 -7 -2 11.59 -9.30
 -1 7 -2 11.12 -2.64
 1 7 2 11.59 9.30
 3 -7 2 7.01 1.28
 3 -7 2 7.01 1.28
 -3 -7 -2 7.35 -5.34
 -3 -7 -2 7.35 -5.34
 -3 7 -2 7.01 -1.28
 3 7 2 7.35 5.34
 -3 7 -2 7.01 -1.28
 5 -7 2 -18.93 1.02
 -5 -7 -2 -19.33 1.13
 5 -7 2 -18.93 1.02
 -5 -7 -2 -19.33 1.13
 5 7 2 -19.33 -1.13
 -5 7 -2 -18.93 -1.02
 7 -7 2 -10.75 1.88
 -7 -7 -2 -10.85 -4.01
 -7 -7 -2 -10.85 -4.01
 7 -7 2 -10.75 1.88
 7 7 2 -10.85 4.01
 -7 7 -2 -10.75 -1.88
 -9 -7 -2 -6.82 -0.72
 9 -7 2 -8.67 2.57
 -9 -7 -2 -6.82 -0.72
 9 -7 2 -8.67 2.57
 -9 7 -2 -8.67 -2.57
 11 -7 2 1.82 -2.40
 -11 -7 -2 3.51 -3.15
 -11 -7 -2 3.51 -3.15
 11 -7 2 1.82 -2.40
 11 7 2 3.51 3.15
 -11 7 -2 1.82 2.40
 -13 -7 -2 7.14 1.09
 13 -7 2 5.82 -0.78
 13 -7 2 5.82 -0.78
 -13 7 -2 5.82 0.78
 13 7 2 7.14 -1.09
 15 -7 2 3.13 -5.36
 15 -7 2 3.13 -5.36
 -15 -7 -2 2.71 5.23
 15 7 2 2.71 -5.23
 -15 7 -2 3.13 5.36
 -17 -7 -2 3.62 6.35
 17 -7 2 3.70 -3.35
 17 -7 2 3.70 -3.35
 17 7 2 3.62 -6.35
 -17 7 -2 3.70 3.35
 -19 -7 -2 6.40 4.42
 19 -7 2 6.69 2.95
 19 -7 2 6.69 2.95
 19 7 2 6.40 -4.42
 -19 7 -2 6.69 -2.95
 -21 -7 -2 -0.85 -0.74
 21 -7 2 0.45 0.71
 21 -7 2 0.45 0.71
 -21 7 -2 0.45 -0.71
 21 7 2 -0.85 0.74
 -23 -7 -2 -5.35 -4.45
 -23 7 -2 -3.31 -4.99
 23 7 2 -5.35 4.45
 -25 7 -2 -1.27 -3.56
 25 7 2 -1.08 -0.50
 -28 -8 2 -2.00 -3.53
 28 -8 -2 -1.74 -4.44
 28 8 -2 -2.00 3.53
 26 -8 -2 -1.45 2.07
 -26 -8 2 -1.97 1.32
 26 8 -2 -1.97 -1.32
 24 -8 -2 0.18 4.20
 24 -8 -2 0.18 4.20
 -24 -8 2 0.56 -0.10
 24 8 -2 0.56 0.10
 -22 -8 2 -2.75 -0.82
 22 -8 -2 -2.14 1.86
 22 -8 -2 -2.14 1.86
 22 8 -2 -2.75 0.82
 -22 8 2 -2.14 -1.86
 20 -8 -2 -1.80 2.55
 20 -8 -2 -1.80 2.55
 -20 -8 2 -1.79 -0.97
 20 8 -2 -1.79 0.97
 -20 8 2 -1.80 -2.55
 18 -8 -2 -6.24 -1.69
 -18 -8 2 -4.91 -0.54
 18 -8 -2 -6.24 -1.69
 18 8 -2 -4.91 0.54
 -18 8 2 -6.24 1.69
 -16 -8 2 2.36 4.96
 16 -8 -2 0.60 -1.12
 16 -8 -2 0.60 -1.12
 -16 8 2 0.60 1.12
 16 8 -2 2.36 -4.96
 14 -8 -2 2.16 -1.20
 -14 -8 2 2.57 2.89
 14 -8 -2 2.16 -1.20
 -14 8 2 2.16 1.20
 14 8 -2 2.57 -2.89
 12 -8 -2 -7.40 -1.57
 -12 -8 2 -7.70 4.95
 12 -8 -2 -7.40 -1.57
 -12 8 2 -7.40 1.57
 12 8 -2 -7.70 -4.95
 -10 -8 2 -11.30 -5.23
 10 -8 -2 -11.13 0.73
 10 -8 -2 -11.13 0.73
 -10 8 2 -11.13 -0.73
 -8 -8 2 -15.79 -1.54
 8 -8 -2 -16.39 0.37
 -8 8 2 -16.39 -0.37
 -6 -8 2 -0.10 0.03
 6 -8 -2 -0.11 1.29
 6 -8 -2 -0.11 1.29
 -6 8 2 -0.11 -1.29
 4 -8 -2 9.34 2.52
 4 -8 -2 9.34 2.52
 -4 -8 2 9.37 -1.94
 -4 -8 2 9.37 -1.94
 -4 8 2 9.34 -2.52
 4 8 -2 9.37 1.94
 2 -8 -2 -8.71 -3.14
 -2 -8 2 -9.42 -3.94
 -2 -8 2 -9.42 -3.94
 2 -8 -2 -8.71 -3.14
 2 8 -2 -9.42 3.94
 -2 8 2 -8.71 3.14
 0 -8 2 -4.06 -0.78
 0 -8 2 -4.06 -0.78
 0 -8 2 -4.06 -0.78
 0 -8 -2 -3.34 3.85
 0 8 -2 -4.06 0.78
 0 8 2 -3.34 -3.85
 -2 -8 -2 -12.76 1.70
 2 -8 2 -12.02 -1.81
 -2 -8 -2 -12.76 1.70
 -2 8 -2 -12.02 1.81
 2 8 2 -12.76 -1.70
 -4 -8 -2 0.83 -0.85
 4 -8 2 0.79 -1.31
 4 -8 2 0.79 -1.31
 -4 -8 -2 0.83 -0.85
 -4 8 -2 0.79 1.31
 4 8 2 0.83 0.85
 -4 8 -2 0.79 1.31
 6 -8 2 10.54 -1.41
 -6 -8 -2 10.23 -1.79
 6 -8 2 10.54 -1.41
 -6 -8 -2 10.23 -1.79
 -6 8 -2 10.54 1.41
 6 8 2 10.23 1.79
 8 -8 2 4.53 -4.78
 -8 -8 -2 4.43 5.09
 -8 -8 -2 4.43 5.09
 8 -8 2 4.53 -4.78
 -8 8 -2 4.53 4.78
 8 8 2 4.43 -5.09
 -10 -8 -2 6.49 -0.16
 -10 -8 -2 6.49 -0.16
 10 -8 2 6.20 -2.96
 -10 8 -2 6.20 2.96
 -12 -8 -2 0.18 6.02
 -12 -8 -2 0.18 6.02
 12 -8 2 0.76 -4.03
 12 -8 2 0.76 -4.03
 12 8 2 0.18 -6.02
 -12 8 -2 0.76 4.03
 14 -8 2 1.96 0.92
 -14 -8 -2 2.66 -1.92
 14 -8 2 1.96 0.92
 -14 -8 -2 2.66 -1.92
 14 8 2 2.66 1.92
 -14 8 -2 1.96 -0.92
 16 -8 2 -0.70 1.42
 -16 -8 -2 -0.17 0.59
 16 -8 2 -0.70 1.42
 16 8 2 -0.17 -0.59
 -16 8 -2 -0.70 -1.42
 18 -8 2 -4.77 -2.20
 -18 -8 -2 -4.94 -2.78
 -18 8 -2 -4.77 2.20
 18 8 2 -4.94 2.78
 -20 -8 -2 -2.56 -0.93
 20 -8 2 -1.73 1.59
 -20 8 -2 -1.73 -1.59
 20 8 2 -2.56 0.93
 -22 -8 -2 1.78 0.10
 -22 8 -2 2.63 2.13
 22 8 2 1.78 -0.10
 24 8 2 0.92 0.48
 -24 8 -2 0.55 3.00
 27 -9 -2 2.54 1.62
 -27 -9 2 3.14 2.34
 27 9 -2 3.14 -2.34
 -25 -9 2 2.44 -1.39
 25 -9 -2 2.48 -0.53
 25 9 -2 2.44 1.39
 23 -9 -2 1.74 -1.81
 -23 -9 2 1.50 -2.15
 23 9 -2 1.50 2.15
 -21 -9 2 -0.83 -3.90
 21 -9 -2 -0.74 0.56
 -21 9 2 -0.74 -0.56
 21 9 -2 -0.83 3.90
 19 -9 -2 1.74 -0.18
 -19 -9 2 1.50 -5.30
 19 -9 -2 1.74 -0.18
 -19 9 2 1.74 0.18
 19 9 -2 1.50 5.30
 -17 -9 2 -1.28 -4.29
 17 -9 -2 0.15 -1.96
 17 -9 -2 0.15 -1.96
 17 9 -2 -1.28 4.29
 -17 9 2 0.15 1.96
 15 -9 -2 -6.61 -3.38
 -15 -9 2 -7.80 -2.60
 15 -9 -2 -6.61 -3.38
 -15 9 2 -6.61 3.38
 15 9 -2 -7.80 2.60
 13 -9 -2 -1.75 0.71
 -13 -9 2 -1.54 -7.42
 13 -9 -2 -1.75 0.71
 13 9 -2 -1.54 7.42
 -13 9 2 -1.75 -0.71
 -11 -9 2 -3.21 -3.58
 11 -9 -2 -3.85 0.33
 11 -9 -2 -3.85 0.33
 11 9 -2 -3.21 3.58
 -11 9 2 -3.85 -0.33
 -9 -9 2 1.56 -5.00
 9 -9 -2 1.23 6.42
 -9 -9 2 1.56 -5.00
 9 -9 -2 1.23 6.42
 -9 9 2 1.23 -6.42
 -7 -9 2 -1.06 -2.21
 -7 -9 2 -1.06 -2.21
 7 -9 -2 -0.67 0.31
 -7 9 2 -0.67 -0.31
 -5 -9 2 -5.07 1.94
 -5 9 2 -5.30 0.97
 5 9 -2 -5.07 -1.94
 -3 -9 2 -0.10 0.09
 3 -9 -2 0.04 -0.57
 3 -9 -2 0.04 -0.57
 -3 -9 2 -0.10 0.09
 3 9 -2 -0.10 -0.09
 -3 9 2 0.04 0.57
 -1 -9 2 1.23 1.14
 1 -9 -2 0.05 -0.03
 -1 -9 2 1.23 1.14
 1 9 -2 1.23 -1.14
 -1 9 2 0.05 0.03
 1 -9 2 -0.32 -3.28
 -1 -9 -2 -0.82 5.53
 -1 -9 -2 -0.82 5.53
 1 9 2 -0.82 -5.53
 -1 9 -2 -0.32 3.28
 3 -9 2 0.64 -2.63
 -3 -9 -2 0.59 2.87
 -3 -9 -2 0.59 2.87
 -3 9 -2 0.64 2.63
 3 9 2 0.59 -2.87
 5 -9 2 -2.72 3.84
 5 -9 2 -2.72 3.84
 -5 -9 -2 -2.82 -0.03
 -5 -9 -2 -2.82 -0.03
 5 9 2 -2.82 0.03
 -5 9 -2 -2.72 -3.84
 7 -9 2 -4.35 -2.83
 -7 -9 -2 -4.43 -0.63
 -7 -9 -2 -4.43 -0.63
 -7 9 -2 -4.35 2.83
 7 9 2 -4.43 0.63
 -9 -9 -2 -0.91 -5.69
 -9 -9 -2 -0.91 -5.69
 9 -9 2 0.07 3.14
 9 9 2 -0.91 5.69
 -9 9 -2 0.07 -3.14
 -11 -9 -2 -6.63 -0.75
 -11 -9 -2 -6.63 -0.75
 11 -9 2 -6.60 -0.34
 11 9 2 -6.63 0.75
 -11 9 -2 -6.60 0.34
 -13 -9 -2 -6.18 0.64
 -13 -9 -2 -6.18 0.64
 13 -9 2 -5.72 -3.58
 13 9 2 -6.18 -0.64
 -13 9 -2 -5.72 3.58
 -15 -9 -2 -4.08 0.64
 -15 -9 -2 -4.08 0.64
 15 -9 2 -3.93 0.13
 -15 9 -2 -3.93 -0.13
 15 9 2 -4.08 -0.64
 -17 -9 -2 -0.58 0.21
 -17 -9 -2 -0.58 0.21
 17 -9 2 -0.25 2.01
 -17 9 -2 -0.25 -2.01
 17 9 2 -0.58 -0.21
 19 -9 2 2.70 0.06
 -19 -9 -2 3.14 -0.76
 -19 -9 -2 3.14 -0.76
 19 9 2 3.14 0.76
 -19 9 -2 2.70 -0.06
 -21 -9 -2 0.60 -0.85
 -21 -9 -2 0.60 -0.85
 21 9 2 0.60 0.85
 -21 9 -2 -0.61 0.50
 -23 -9 -2 0.72 -1.85
 -23 -9 -2 0.72 -1.85
 -23 9 -2 0.66 2.26
 23 9 2 0.72 1.85
 -26 -10 2 0.22 -3.42
 26 -10 -2 0.96 -2.25
 26 10 -2 0.22 3.42
 24 -10 -2 -0.56 -3.64
 -24 -10 2 -0.84 -0.86
 24 10 -2 -0.84 0.86
 22 -10 -2 5.02 2.87
 -22 -10 2 5.93 2.51
 22 10 -2 5.93 -2.51
 20 -10 -2 1.45 -0.19
 -20 -10 2 1.58 7.11
 20 10 -2 1.58 -7.11
 -20 10 2 1.45 0.19
 -18 -10 2 -0.94 7.51
 18 -10 -2 -1.55 4.89
 -18 10 2 -1.55 -4.89
 18 10 -2 -0.94 -7.51
 -16 -10 2 0.61 2.74
 16 -10 -2 -0.63 1.49
 16 10 -2 0.61 -2.74
 -16 10 2 -0.63 -1.49
 14 -10 -2 0.18 5.82
 -14 -10 2 1.02 -4.80
 14 10 -2 1.02 4.80
 -14 10 2 0.18 -5.82
 -12 -10 2 -0.89 -0.28
 -12 -10 2 -0.89 -0.28
 12 -10 -2 -0.89 1.96
 12 10 -2 -0.89 0.28
 -12 10 2 -0.89 -1.96
 -10 -10 2 4.24 -2.34
 10 -10 -2 4.89 2.87
 10 -10 -2 4.89 2.87
 -10 -10 2 4.24 -2.34
 10 10 -2 4.24 2.34
 -10 10 2 4.89 -2.87
 -8 -10 2 1.32 2.56
 -8 -10 2 1.32 2.56
 8 -10 -2 1.53 -0.86
 8 -10 -2 1.53 -0.86
 8 10 -2 1.32 -2.56
 -8 10 2 1.53 0.86
 -6 -10 2 -1.15 -1.16
 6 10 -2 -1.15 1.16
 -6 10 2 -1.17 -2.78
 4 -10 -2 -1.58 -1.97
 4 -10 -2 -1.58 -1.97
 -4 -10 2 -1.71 2.58
 -4 -10 2 -1.71 2.58
 4 10 -2 -1.71 -2.58
 -4 10 2 -1.58 1.97
 -2 -10 2 1.60 1.75
 2 -10 -2 1.76 2.05
 -2 10 2 1.76 -2.05
 2 10 -2 1.60 -1.75
 0 -10 -2 1.85 -1.44
 0 -10 2 1.38 1.68
 0 -10 -2 1.85 -1.44
 0 10 2 1.85 1.44
 0 10 -2 1.38 -1.68
 -2 -10 -2 1.04 -2.47
 2 -10 2 0.90 5.33
 -2 -10 -2 1.04 -2.47
 2 10 2 1.04 2.47
 -2 10 -2 0.90 -5.33
 -4 -10 -2 -0.97 -0.08
 -4 -10 -2 -0.97 -0.08
 4 -10 2 -0.55 1.97
 -4 10 -2 -0.55 -1.97
 4 10 2 -0.97 0.08
 -6 -10 -2 -4.84 -4.30
 6 -10 2 -4.44 6.82
 -6 -10 -2 -4.84 -4.30
 6 10 2 -4.84 4.30
 -6 10 -2 -4.44 -6.82
 -8 -10 -2 -5.83 -7.97
 8 -10 2 -5.82 8.51
 -8 -10 -2 -5.83 -7.97
 -8 10 -2 -5.82 -8.51
 8 10 2 -5.83 7.97
 -10 -10 -2 -2.44 -4.22
 10 -10 2 -2.25 4.57
 -10 -10 -2 -2.44 -4.22
 -10 10 -2 -2.25 -4.57
 10 10 2 -2.44 4.22
 -12 -10 -2 -0.82 -1.81
 12 -10 2 -2.31 3.60
 -12 -10 -2 -0.82 -1.81
 12 10 2 -0.82 1.81
 -12 10 -2 -2.31 -3.60
 -14 -10 -2 -1.05 -3.32
 -14 -10 -2 -1.05 -3.32
 14 -10 2 -1.30 2.38
 14 10 2 -1.05 3.32
 -14 10 -2 -1.30 -2.38
 -16 -10 -2 -0.49 -2.39
 16 -10 2 -1.32 -4.90
 -16 -10 -2 -0.49 -2.39
 16 10 2 -0.49 2.39
 -16 10 -2 -1.32 4.90
 18 -10 2 -0.18 0.10
 -18 -10 -2 0.92 -2.27
 -18 -10 -2 0.92 -2.27
 -18 10 -2 -0.18 -0.10
 18 10 2 0.92 2.27
 -20 -10 -2 -0.04 -5.59
 20 -10 2 -1.10 -4.16
 -20 -10 -2 -0.04 -5.59
 -20 10 -2 -1.10 4.16
 20 10 2 -0.04 5.59
 -22 -10 -2 2.47 -0.08
 -22 -10 -2 2.47 -0.08
 -22 10 -2 1.94 -2.94
 22 10 2 2.47 0.08
 25 -11 -2 -0.03 1.36
 25 11 -2 0.45 -2.46
 23 -11 -2 -3.12 -3.02
 -23 -11 2 -3.60 -4.15
 23 11 -2 -3.60 4.15
 21 -11 -2 -2.21 -11.94
 -21 -11 2 -1.70 -10.44
 21 11 -2 -1.70 10.44
 -19 -11 2 -2.71 -12.76
 19 -11 -2 -2.93 -12.87
 -19 -11 2 -2.71 -12.76
 -19 11 2 -2.93 12.87
 19 11 -2 -2.71 12.76
 -17 -11 2 0.38 -7.45
 -17 -11 2 0.38 -7.45
 17 -11 -2 -0.18 -11.59
 17 11 -2 0.38 7.45
 -17 11 2 -0.18 11.59
 -15 -11 2 -1.07 1.09
 15 -11 -2 -0.99 -6.10
 -15 -11 2 -1.07 1.09
 15 11 -2 -1.07 -1.09
 -15 11 2 -0.99 6.10
 -13 -11 2 -0.02 5.18
 -13 -11 2 -0.02 5.18
 13 -11 -2 0.28 -6.53
 13 11 -2 -0.02 -5.18
 -13 11 2 0.28 6.53
 11 -11 -2 -4.30 -1.53
 -11 -11 2 -3.73 -3.09
 -11 -11 2 -3.73 -3.09
 11 11 -2 -3.73 3.09
 -11 11 2 -4.30 1.53
 9 -11 -2 -2.13 -3.43
 -9 -11 2 -1.47 2.86
 -9 -11 2 -1.47 2.86
 9 11 -2 -1.47 -2.86
 -9 11 2 -2.13 3.43
 -7 -11 2 0.76 3.40
 7 -11 -2 0.10 -2.45
 7 11 -2 0.76 -3.40
 -7 11 2 0.10 2.45
 5 -11 -2 2.26 0.72
 -5 -11 2 3.24 -0.13
 5 11 -2 3.24 0.13
 -5 11 2 2.26 -0.72
 3 -11 -2 -1.85 -0.16
 -3 -11 2 -0.89 0.17
 3 -11 -2 -1.85 -0.16
 3 11 -2 -0.89 -0.17
 -3 11 2 -1.85 0.16
 1 -11 -2 -3.14 2.56
 -1 -11 2 -3.99 -2.54
 1 -11 -2 -3.14 2.56
 1 11 -2 -3.99 2.54
 -1 11 2 -3.14 -2.56
 1 -11 2 -2.96 0.84
 -1 -11 -2 -2.39 0.01
 -1 -11 -2 -2.39 0.01
 1 11 2 -2.39 -0.01
 -1 11 -2 -2.96 -0.84
 3 -11 2 -2.09 -0.10
 -3 -11 -2 -1.06 2.20
 -3 -11 -2 -1.06 2.20
 -3 11 -2 -2.09 0.10
 3 11 2 -1.06 -2.20
 5 -11 2 2.49 -3.06
 -5 -11 -2 2.69 1.05
 -5 -11 -2 2.69 1.05
 -5 11 -2 2.49 3.06
 5 11 2 2.69 -1.05
 -7 -11 -2 4.17 6.15
 7 -11 2 2.74 -6.98
 -7 -11 -2 4.17 6.15
 -7 11 -2 2.74 6.98
 7 11 2 4.17 -6.15
 -9 -11 -2 2.05 10.34
 -9 -11 -2 2.05 10.34
 9 -11 2 1.83 -10.46
 -9 11 -2 1.83 10.46
 9 11 2 2.05 -10.34
 11 -11 2 1.62 -4.86
 -11 -11 -2 0.55 -1.19
 -11 -11 -2 0.55 -1.19
 11 11 2 0.55 1.19
 -11 11 -2 1.62 4.86
 -13 -11 -2 3.73 -2.61
 13 -11 2 5.73 -5.35
 -13 -11 -2 3.73 -2.61
 -13 11 -2 5.73 5.35
 13 11 2 3.73 2.61
 15 -11 2 3.39 -2.45
 -15 -11 -2 2.98 -2.63
 -15 -11 -2 2.98 -2.63
 -15 11 -2 3.39 2.45
 15 11 2 2.98 2.63
 17 -11 2 4.31 -4.65
 -17 -11 -2 4.93 -5.31
 -17 -11 -2 4.93 -5.31
 17 11 2 4.93 5.31
 -17 11 -2 4.31 4.65
 -19 -11 -2 -2.45 1.86
 19 -11 2 -1.23 -1.98
 -19 -11 -2 -2.45 1.86
 19 11 2 -2.45 -1.86
 -19 11 -2 -1.23 1.98
 -21 -11 -2 -0.83 1.93
 -21 -11 -2 -0.83 1.93
 21 11 2 -0.83 -1.93
 -21 11 -2 0.07 3.16
 -22 -12 2 -1.60 5.08
 22 -12 -2 -1.03 4.80
 -22 -12 2 -1.60 5.08
 22 12 -2 -1.60 -5.08
 -20 -12 2 -3.64 9.10
 20 -12 -2 -2.98 11.84
 -20 -12 2 -3.64 9.10
 20 12 -2 -3.64 -9.10
 -18 -12 2 0.87 3.51
 -18 -12 2 0.87 3.51
 18 -12 -2 2.18 12.17
 18 12 -2 0.87 -3.51
 -18 12 2 2.18 -12.17
 -16 -12 2 -0.48 -8.54
 16 -12 -2 1.60 11.59
 -16 -12 2 -0.48 -8.54
 -16 12 2 1.60 -11.59
 16 12 -2 -0.48 8.54
 -14 -12 2 0.91 -3.58
 14 -12 -2 2.50 1.72
 -14 12 2 2.50 -1.72
 14 12 -2 0.91 3.58
 -12 -12 2 -1.21 3.77
 12 -12 -2 -0.11 -3.08
 -12 12 2 -0.11 3.08
 12 12 -2 -1.21 -3.77
 -10 -12 2 4.17 9.80
 10 -12 -2 4.49 -7.73
 10 12 -2 4.17 -9.80
 -10 12 2 4.49 7.73
 -8 -12 2 0.57 2.51
 8 -12 -2 0.34 0.60
 -8 12 2 0.34 -0.60
 8 12 -2 0.57 -2.51
 6 -12 -2 1.51 0.67
 -6 -12 2 1.55 -0.35
 6 12 -2 1.55 0.35
 -6 12 2 1.51 -0.67
 -4 -12 2 2.60 4.81
 4 -12 -2 2.97 3.53
 -4 12 2 2.97 -3.53
 4 12 -2 2.60 -4.81
 2 -12 -2 2.33 0.24
 -2 -12 2 3.30 5.82
 -2 12 2 2.33 -0.24
 2 12 -2 3.30 -5.82
 0 -12 -2 3.21 1.46
 0 -12 2 4.46 5.38
 0 12 2 3.21 -1.46
 0 12 -2 4.46 -5.38
 2 -12 2 3.41 0.88
 -2 -12 -2 2.16 -0.20
 2 12 2 2.16 0.20
 -2 12 -2 3.41 -0.88
 -4 -12 -2 1.41 2.15
 4 -12 2 1.10 -1.09
 -4 -12 -2 1.41 2.15
 -4 12 -2 1.10 1.09
 4 12 2 1.41 -2.15
 6 -12 2 -1.04 -0.58
 -6 -12 -2 -1.43 1.37
 -6 -12 -2 -1.43 1.37
 -6 12 -2 -1.04 0.58
 6 12 2 -1.43 -1.37
 -8 -12 -2 -1.81 -3.09
 8 -12 2 -0.75 2.88
 -8 -12 -2 -1.81 -3.09
 8 12 2 -1.81 3.09
 -8 12 -2 -0.75 -2.88
 10 -12 2 2.63 2.90
 -10 -12 -2 2.12 -4.57
 -10 -12 -2 2.12 -4.57
 10 12 2 2.12 4.57
 -10 12 -2 2.63 -2.90
 12 -12 2 -1.43 2.75
 -12 -12 -2 -0.28 -1.17
 -12 -12 -2 -0.28 -1.17
 -12 12 -2 -1.43 -2.75
 12 12 2 -0.28 1.17
 -14 -12 -2 -2.02 3.53
 -14 -12 -2 -2.02 3.53
 14 -12 2 -3.04 2.22
 14 12 2 -2.02 -3.53
 -14 12 -2 -3.04 -2.22
 -16 -12 -2 -6.15 3.53
 16 -12 2 -4.77 2.46
 -16 -12 -2 -6.15 3.53
 -16 12 -2 -4.77 -2.46
 16 12 2 -6.15 -3.53
 -18 -12 -2 -4.66 0.61
 -18 -12 -2 -4.66 0.61
 18 -12 2 -4.20 0.76
 18 12 2 -4.66 -0.61
 -18 12 -2 -4.20 -0.76
 -20 -12 -2 -0.46 0.20
 -20 -12 -2 -0.46 0.20
 20 12 2 -0.46 -0.20
 -20 12 -2 -1.23 -2.26
 -21 -13 2 1.49 -0.53
 21 -13 -2 1.30 -2.74
 21 13 -2 1.49 0.53
 -19 -13 2 1.71 -6.37
 19 -13 -2 2.23 -6.96
 19 13 -2 1.71 6.37
 17 -13 -2 -2.79 -12.13
 -17 -13 2 -2.94 10.10
 17 13 -2 -2.94 -10.10
 -17 13 2 -2.79 12.13
 -15 -13 2 -1.02 7.99
 15 -13 -2 -2.63 -8.78
 -15 13 2 -2.63 8.78
 15 13 -2 -1.02 -7.99
 13 -13 -2 1.73 0.40
 -13 -13 2 3.61 1.35
 -13 13 2 1.73 -0.40
 13 13 -2 3.61 -1.35
 -11 -13 2 -0.19 -6.61
 11 -13 -2 -1.93 8.11
 -11 13 2 -1.93 -8.11
 11 13 -2 -0.19 6.61
 -9 -13 2 -6.23 -3.95
 9 -13 -2 -6.37 2.73
 -9 13 2 -6.37 -2.73
 9 13 -2 -6.23 3.95
 7 -13 -2 -0.96 -4.11
 -7 -13 2 -0.16 3.30
 7 13 -2 -0.16 -3.30
 -7 13 2 -0.96 4.11
 -5 -13 2 -2.63 2.74
 5 -13 -2 -3.09 -5.14
 -5 13 2 -3.09 5.14
 5 13 -2 -2.63 -2.74
 -3 -13 2 -3.78 -7.14
 3 -13 -2 -3.55 -0.92
 -3 13 2 -3.55 0.92
 3 13 -2 -3.78 7.14
 1 -13 -2 -1.98 -3.47
 -1 -13 2 -2.51 -2.28
 -1 13 2 -1.98 3.47
 1 13 -2 -2.51 2.28
 1 -13 2 -0.83 -4.80
 -1 -13 -2 0.62 -1.51
 -1 13 -2 -0.83 4.80
 1 13 2 0.62 1.51
 -3 -13 -2 -1.88 0.81
 3 -13 2 -3.24 -0.25
 3 13 2 -1.88 -0.81
 -3 13 -2 -3.24 0.25
 -5 -13 -2 -1.62 0.82
 5 -13 2 -1.35 0.16
 -5 13 -2 -1.35 -0.16
 5 13 2 -1.62 -0.82
 7 -13 2 2.36 -0.45
 -7 -13 -2 2.27 1.35
 -7 13 -2 2.36 0.45
 7 13 2 2.27 -1.35
 -9 -13 -2 -1.64 4.25
 9 -13 2 -2.31 -1.34
 9 13 2 -1.64 -4.25
 -9 13 -2 -2.31 1.34
 -11 -13 -2 -1.32 2.62
 11 -13 2 -1.11 -0.02
 11 13 2 -1.32 -2.62
 -11 13 -2 -1.11 0.02
 13 -13 2 1.19 -1.43
 -13 -13 -2 0.04 -1.98
 -13 13 -2 1.19 1.43
 13 13 2 0.04 1.98
 15 -13 2 1.26 -0.50
 -15 -13 -2 1.64 -5.59
 -15 -13 -2 1.64 -5.59
 15 13 2 1.64 5.59
 -15 13 -2 1.26 0.50
 17 -13 2 1.04 0.11
 -17 -13 -2 1.62 3.60
 -17 -13 -2 1.62 3.60
 17 13 2 1.62 -3.60
 -17 13 -2 1.04 -0.11
 -19 -13 -2 3.25 -1.81
 -19 -13 -2 3.25 -1.81
 19 -13 2 3.14 -1.51
 19 13 2 3.25 1.81
 -19 13 -2 3.14 1.51
 18 -14 -2 0.53 4.23
 -18 -14 2 2.95 0.63
 18 14 -2 2.95 -0.63
 -16 -14 2 2.05 -5.03
 16 -14 -2 1.69 8.47
 16 14 -2 2.05 5.03
 -16 14 2 1.69 -8.47
 14 -14 -2 -2.43 7.42
 -14 -14 2 -2.66 -2.97
 -14 14 2 -2.43 -7.42
 14 14 -2 -2.66 2.97
 -12 -14 2 -1.98 3.53
 12 -14 -2 -0.65 -1.03
 12 14 -2 -1.98 -3.53
 -12 14 2 -0.65 1.03
 -10 -14 2 3.40 6.26
 10 -14 -2 3.53 -2.95
 10 14 -2 3.40 -6.26
 -10 14 2 3.53 2.95
 8 -14 -2 0.36 3.49
 -8 -14 2 1.09 -3.34
 -8 14 2 0.36 -3.49
 8 14 -2 1.09 3.34
 6 -14 -2 -2.47 7.82
 -6 -14 2 -2.96 -6.66
 6 14 -2 -2.96 6.66
 -6 14 2 -2.47 -7.82
 4 -14 -2 -0.28 -0.49
 -4 -14 2 -0.11 1.11
 -4 14 2 -0.28 0.49
 4 14 -2 -0.11 -1.11
 -2 -14 2 -0.84 1.72
 2 -14 -2 -1.08 0.71
 -2 14 2 -1.08 -0.71
 2 14 -2 -0.84 -1.72
 0 -14 2 -3.65 1.17
 0 -14 -2 -4.22 2.95
 0 14 -2 -3.65 -1.17
 0 14 2 -4.22 -2.95
 -2 -14 -2 -3.34 1.40
 2 -14 2 -2.12 1.88
 -2 14 -2 -2.12 -1.88
 2 14 2 -3.34 -1.40
 -4 -14 -2 1.13 -1.09
 4 -14 2 1.30 0.96
 -4 14 -2 1.30 -0.96
 4 14 2 1.13 1.09
 -6 -14 -2 0.36 2.89
 6 -14 2 -0.70 1.73
 6 14 2 0.36 -2.89
 -6 14 -2 -0.70 -1.73
 8 -14 2 -0.91 5.16
 -8 -14 -2 0.06 -2.39
 -8 14 -2 -0.91 -5.16
 8 14 2 0.06 2.39
 10 -14 2 0.18 1.73
 -10 -14 -2 1.05 0.00
 -10 14 -2 0.18 -1.73
 10 14 2 1.05 0.00
 12 -14 2 -1.00 2.76
 -12 -14 -2 -0.96 2.66
 12 14 2 -0.96 -2.66
 -12 14 -2 -1.00 -2.76
 14 -14 2 0.11 -0.67
 -14 -14 -2 1.24 3.56
 14 14 2 1.24 -3.56
 -14 14 -2 0.11 0.67
 16 -14 2 -0.95 -0.76
 -16 -14 -2 -1.21 -0.86
 -16 14 -2 -0.95 0.76
 16 14 2 -1.21 0.86
 -17 -15 2 -1.07 -0.66
 17 -15 -2 -0.05 -1.41
 17 15 -2 -1.07 0.66
 -15 -15 2 0.42 4.58
 15 -15 -2 0.17 -6.38
 -15 15 2 0.17 6.38
 15 15 -2 0.42 -4.58
 -13 -15 2 0.61 0.12
 13 -15 -2 1.03 -3.68
 13 15 -2 0.61 -0.12
 -13 15 2 1.03 3.68
 -11 -15 2 -2.42 -1.09
 11 -15 -2 -3.18 -1.02
 11 15 -2 -2.42 1.09
 -11 15 2 -3.18 1.02
 9 -15 -2 -1.39 0.33
 -9 -15 2 -1.46 1.05
 9 15 -2 -1.46 -1.05
 -9 15 2 -1.39 -0.33
 7 -15 -2 2.07 -7.57
 -7 -15 2 2.75 8.42
 7 15 -2 2.75 -8.42
 -7 15 2 2.07 7.57
 5 -15 -2 1.37 -4.07
 -5 -15 2 2.01 4.37
 5 15 -2 2.01 -4.37
 -5 15 2 1.37 4.07
 3 -15 -2 -0.12 1.91
 -3 -15 2 0.01 1.50
 -3 15 2 -0.12 -1.91
 3 15 -2 0.01 -1.50
 1 -15 -2 4.15 0.94
 -1 -15 2 3.43 -0.33
 1 15 -2 3.43 0.33
 -1 15 2 4.15 -0.94
 1 -15 2 4.18 -1.10
 -1 -15 -2 4.17 -0.40
 -1 15 -2 4.18 1.10
 1 15 2 4.17 0.40
 3 -15 2 -0.19 1.52
 -3 -15 -2 0.43 -0.64
 3 15 2 0.43 0.64
 -3 15 -2 -0.19 -1.52
 -5 -15 -2 -2.71 -2.80
 5 -15 2 -3.07 2.73
 -5 15 -2 -3.07 -2.73
 5 15 2 -2.71 2.80
 7 -15 2 -0.08 -1.00
 -7 -15 -2 -0.47 -2.18
 -7 15 -2 -0.08 1.00
 7 15 2 -0.47 2.18
 9 -15 2 0.09 2.28
 -9 -15 -2 -1.40 -0.95
 9 15 2 -1.40 0.95
 -9 15 -2 0.09 -2.28
 -11 -15 -2 -1.77 -1.63
 11 -15 2 -2.33 -2.00
 11 15 2 -1.77 1.63
 -11 15 -2 -2.33 2.00
 -13 -15 -2 -3.14 -1.74
 13 -15 2 -3.02 -0.20
 -13 15 -2 -3.02 0.20
 13 15 2 -3.14 1.74
 -12 -16 2 0.27 0.28
 12 -16 -2 -0.18 1.22
 -12 16 2 -0.18 -1.22
 12 16 -2 0.27 -0.28
 -10 -16 2 1.67 -2.06
 10 -16 -2 1.77 -1.85
 -10 16 2 1.77 1.85
 10 16 -2 1.67 2.06
 -8 -16 2 -1.59 -2.25
 8 -16 -2 -0.10 0.56
 8 16 -2 -1.59 2.25
 -8 16 2 -0.10 -0.56
 -6 -16 2 -3.68 -0.75
 6 -16 -2 -3.04 2.23
 -6 16 2 -3.04 -2.23
 6 16 -2 -3.68 0.75
 -4 -16 2 1.47 -1.08
 4 -16 -2 1.06 3.28
 4 16 -2 1.47 1.08
 -4 16 2 1.06 -3.28
 -2 -16 2 3.05 1.79
 2 -16 -2 1.89 -1.72
 -2 16 2 1.89 1.72
 2 16 -2 3.05 -1.79
 0 -16 2 -3.21 3.33
 0 -16 -2 -3.58 1.33
 0 16 2 -3.58 -1.33
 0 16 -2 -3.21 -3.33
 2 -16 2 0.64 0.03
 -2 -16 -2 0.33 2.81
 -2 16 -2 0.64 -0.03
 2 16 2 0.33 -2.81
 4 -16 2 5.52 -2.79
 -4 -16 -2 3.82 2.52
 -4 16 -2 5.52 2.79
 4 16 2 3.82 -2.52
 6 -16 2 1.10 -1.17
 -6 -16 -2 0.98 1.00
 6 16 2 0.98 -1.00
 -6 16 -2 1.10 1.17
 8 -16 2 -0.68 -3.74
 -8 -16 -2 -0.41 2.87
 8 16 2 -0.41 -2.87
 -8 16 -2 -0.68 3.74
 -10 -16 -2 0.91 1.01
 10 -16 2 -0.18 -3.12
 -10 16 -2 -0.18 3.12
 10 16 2 0.91 -1.01
 9 -17 -2 -1.38 0.24
 -7 -17 2 2.12 -0.69
 7 -17 -2 1.95 1.15
 7 17 -2 2.12 0.69
 5 -17 -2 0.19 -0.84
 -5 -17 2 -0.45 0.37
 5 17 -2 -0.45 -0.37
 -5 17 2 0.19 0.84
 3 -17 -2 -1.73 -2.64
 -3 -17 2 -3.95 2.39
 -3 17 2 -1.73 2.64
 3 17 -2 -3.95 -2.39
 -1 -17 2 -0.77 -0.11
 1 -17 -2 -1.04 0.83
 1 17 -2 -0.77 0.11
 -1 17 2 -1.04 -0.83
 -1 -17 -2 0.72 -1.92
 1 -17 2 -0.07 1.35
 1 17 2 0.72 1.92
 -1 17 -2 -0.07 -1.35
 3 -17 2 -4.19 1.49
 -3 -17 -2 -3.66 -0.69
 -3 17 -2 -4.19 -1.49
 3 17 2 -3.66 0.69
 5 -17 2 -2.51 0.38
 -5 -17 -2 -1.86 0.59
 -5 17 -2 -2.51 -0.38
 5 17 2 -1.86 -0.59
 31 -1 -3 -3.94 -4.11
 31 1 -3 5.68 0.57
 29 -1 -3 -4.66 -3.60
 29 1 -3 5.30 -0.79
 27 -1 -3 -1.13 -2.84
 27 1 -3 1.43 1.86
 25 -1 -3 0.22 -0.97
 25 1 -3 -0.44 0.14
 25 1 -3 -0.44 0.14
 23 -1 -3 3.23 -2.41
 23 1 -3 -3.14 -3.21
 23 1 -3 -3.14 -3.21
 21 -1 -3 2.16 -4.04
 21 1 -3 -2.07 4.31
 21 1 -3 -2.07 4.31
 19 -1 -3 -0.88 3.99
 19 1 -3 1.23 1.42
 19 1 -3 1.23 1.42
 17 -1 -3 -14.37 3.98
 17 1 -3 15.35 -0.83
 15 -1 -3 -26.25 -3.89
 15 -1 -3 -26.25 -3.89
 15 1 -3 27.59 -7.24
 13 -1 -3 -11.71 -1.39
 13 -1 -3 -11.71 -1.39
 13 -1 -3 -11.71 -1.39
 11 -1 -3 11.14 -4.50
 11 -1 -3 11.14 -4.50
 11 -1 -3 11.14 -4.50
 11 1 -3 -11.88 2.60
 9 -1 -3 6.45 1.84
 9 -1 -3 6.45 1.84
 9 -1 -3 6.45 1.84
 9 1 -3 -9.70 -0.64
 9 1 -3 -9.70 -0.64
 7 -1 -3 -59.00 7.27
 7 -1 -3 -59.00 7.27
 7 1 -3 58.89 -8.86
 7 1 -3 58.89 -8.86
 5 -1 -3 -153.16 17.79
 5 1 -3 154.63 -16.43
 5 1 -3 154.63 -16.43
 -3 -1 3 41.13 -19.56
 3 -1 -3 -43.12 -1.06
 3 -1 -3 -43.12 -1.06
 3 1 -3 41.13 19.56
 3 1 -3 41.13 19.56
 1 -1 -3 -145.30 -2.17
 -1 -1 3 144.99 -5.06
 -1 -1 3 144.99 -5.06
 1 1 -3 144.99 5.06
 -1 1 3 -145.30 2.17
 1 1 -3 144.99 5.06
 -1 1 3 -145.30 2.17
 1 -1 3 -51.06 17.00
 -1 -1 -3 49.11 28.55
 -1 1 -3 -51.06 -17.00
 1 1 3 49.11 -28.55
 -1 1 -3 -51.06 -17.00
 1 1 3 49.11 -28.55
 3 -1 3 -36.21 11.86
 -3 -1 -3 35.07 13.30
 -3 1 -3 -36.21 -11.86
 5 -1 3 -20.55 5.15
 -5 -1 -3 20.34 3.83
 7 -1 3 -0.96 6.15
 7 -1 3 -0.96 6.15
 7 1 3 2.06 -2.02
 9 -1 3 5.32 6.75
 9 -1 3 5.32 6.75
 9 1 3 -3.78 2.27
 11 -1 3 2.93 -1.73
 11 1 3 -3.45 0.01
 13 -1 3 -1.82 -1.43
 13 1 3 1.76 2.94
 15 -1 3 -5.72 -2.88
 15 1 3 5.69 0.39
 17 -1 3 -7.58 -1.64
 17 1 3 7.84 -2.56
 19 1 3 -0.20 -3.75
 32 -2 -3 3.37 2.40
 32 2 -3 -4.09 1.75
 -30 -2 3 -4.11 -3.01
 30 -2 -3 3.38 5.86
 30 2 -3 -4.11 3.01
 28 -2 -3 2.77 6.65
 28 2 -3 -2.49 3.91
 28 2 -3 -2.49 3.91
 26 -2 -3 -1.15 6.10
 26 2 -3 1.48 0.46
 26 2 -3 1.48 0.46
 24 -2 -3 -2.01 2.32
 24 2 -3 2.93 3.59
 24 2 -3 2.93 3.59
 22 -2 -3 -1.62 -1.55
 22 2 -3 1.67 -1.81
 22 2 -3 1.67 -1.81
 20 -2 -3 -2.86 -2.03
 20 -2 -3 -2.86 -2.03
 20 2 -3 3.39 -4.86
 20 2 -3 3.39 -4.86
 18 -2 -3 0.34 -12.96
 18 -2 -3 0.34 -12.96
 18 2 -3 0.54 -10.37
 18 2 -3 0.54 -10.37
 16 -2 -3 17.60 5.09
 16 -2 -3 17.60 5.09
 16 2 -3 -18.49 2.41
 16 2 -3 -18.49 2.41
 14 -2 -3 7.71 3.83
 14 -2 -3 7.71 3.83
 14 2 -3 -7.98 0.39
 14 2 -3 -7.98 0.39
 12 -2 -3 -16.45 3.36
 12 -2 -3 -16.45 3.36
 12 2 -3 16.20 -2.91
 10 2 -3 35.70 -2.66
 10 2 -3 35.70 -2.66
 8 -2 -3 8.04 7.86
 8 -2 -3 8.04 7.86
 8 2 -3 -7.06 -9.39
 8 2 -3 -7.06 -9.39
 6 -2 -3 85.23 -11.89
 6 -2 -3 85.23 -11.89
 -6 2 3 85.23 11.89
 6 2 -3 -89.98 19.93
 6 2 -3 -89.98 19.93
 4 -2 -3 47.35 5.66
 -4 -2 3 -48.08 8.67
 4 2 -3 -48.08 -8.67
 -4 2 3 47.35 -5.66
 4 2 -3 -48.08 -8.67
 2 -2 -3 29.44 -4.44
 -2 -2 3 -30.89 -4.42
 2 -2 -3 29.44 -4.44
 -2 -2 3 -30.89 -4.42
 2 2 -3 -30.89 4.42
 -2 2 3 29.44 4.44
 2 2 -3 -30.89 4.42
 0 -2 -3 4.97 -19.36
 0 -2 3 -4.96 -19.39
 0 -2 3 -4.96 -19.39
 0 -2 -3 4.97 -19.36
 0 2 -3 -4.96 19.39
 0 2 3 4.97 19.36
 0 2 -3 -4.96 19.39
 -2 -2 -3 -70.75 -47.74
 2 -2 3 72.30 -45.91
 -2 -2 -3 -70.75 -47.74
 2 2 3 -70.75 47.74
 -4 -2 -3 -15.57 -3.76
 4 -2 3 18.59 -13.37
 6 -2 3 -8.97 -3.37
 6 -2 3 -8.97 -3.37
 -6 -2 -3 9.46 1.15
 -8 -2 -3 5.38 9.66
 8 -2 3 -5.72 -3.27
 8 2 3 5.38 -9.66
 10 -2 3 3.83 -2.03
 -10 -2 -3 -4.10 -1.17
 10 -2 3 3.83 -2.03
 10 2 3 -4.10 1.17
 12 -2 3 7.31 6.30
 -12 -2 -3 -6.67 -4.24
 12 -2 3 7.31 6.30
 12 2 3 -6.67 4.24
 14 -2 3 0.51 1.56
 14 -2 3 0.51 1.56
 -14 -2 -3 -1.54 -2.89
 14 2 3 -1.54 2.89
 16 -2 3 8.43 7.49
 -16 -2 -3 -8.29 -7.01
 16 2 3 -8.29 7.01
 -18 -2 -3 -6.37 -4.39
 18 -2 3 5.92 -0.15
 18 2 3 -6.37 4.39
 -20 -2 -3 -1.38 -3.72
 20 2 3 -1.38 3.72
 22 2 3 3.52 1.08
 -31 -3 3 2.54 4.66
 31 -3 -3 -2.50 -4.35
 31 3 -3 2.54 -4.66
 31 3 -3 2.54 -4.66
 29 -3 -3 -2.70 -6.51
 -29 -3 3 2.33 4.39
 29 3 -3 2.33 -4.39
 29 3 -3 2.33 -4.39
 27 -3 -3 -5.31 -9.16
 -27 -3 3 3.88 4.87
 27 3 -3 3.88 -4.87
 27 3 -3 3.88 -4.87
 25 -3 -3 -3.45 -8.34
 -25 -3 3 0.46 2.00
 25 3 -3 0.46 -2.00
 25 3 -3 0.46 -2.00
 23 -3 -3 -5.40 0.04
 23 -3 -3 -5.40 0.04
 23 3 -3 4.83 -1.63
 23 3 -3 4.83 -1.63
 21 -3 -3 -3.39 -2.61
 21 -3 -3 -3.39 -2.61
 21 3 -3 2.63 -0.33
 21 3 -3 2.63 -0.33
 19 -3 -3 1.69 2.90
 19 -3 -3 1.69 2.90
 19 3 -3 -2.16 7.95
 19 3 -3 -2.16 7.95
 17 -3 -3 -5.32 1.69
 17 -3 -3 -5.32 1.69
 17 3 -3 4.79 -0.10
 17 3 -3 4.79 -0.10
 15 -3 -3 -7.09 -5.16
 15 -3 -3 -7.09 -5.16
 15 3 -3 8.14 -3.12
 15 3 -3 8.14 -3.12
 13 -3 -3 -1.63 -0.53
 13 -3 -3 -1.63 -0.53
 13 3 -3 1.56 0.00
 13 3 -3 1.56 0.00
 11 -3 -3 14.87 6.04
 -11 -3 3 -15.48 0.11
 11 -3 -3 14.87 6.04
 11 3 -3 -15.48 -0.11
 11 3 -3 -15.48 -0.11
 9 -3 -3 -1.53 -1.85
 -9 -3 3 0.97 -8.78
 9 3 -3 0.97 8.78
 -9 3 3 -1.53 1.85
 7 -3 -3 -52.60 -1.67
 7 -3 -3 -52.60 -1.67
 -7 3 3 -52.60 1.67
 7 3 -3 52.57 4.05
 7 3 -3 52.57 4.05
 -5 -3 3 43.90 -4.16
 5 -3 -3 -43.38 0.22
 5 3 -3 43.90 4.16
 5 3 -3 43.90 4.16
 -5 3 3 -43.38 -0.22
 3 -3 -3 -79.44 -2.90
 -3 -3 3 79.39 3.93
 -3 -3 3 79.39 3.93
 3 -3 -3 -79.44 -2.90
 -3 3 3 -79.44 2.90
 3 3 -3 79.39 -3.93
 3 3 -3 79.39 -3.93
 1 -3 -3 -23.85 3.01
 -1 -3 3 25.04 4.08
 1 -3 -3 -23.85 3.01
 -1 3 3 -23.85 -3.01
 1 3 -3 25.04 -4.08
 1 -3 3 47.62 12.04
 -1 -3 -3 -47.54 11.40
 -1 -3 -3 -47.54 11.40
 -1 3 -3 47.62 -12.04
 1 3 3 -47.54 -11.40
 -1 3 -3 47.62 -12.04
 3 -3 3 9.63 10.14
 -3 -3 -3 -11.11 9.05
 -3 -3 -3 -11.11 9.05
 3 3 3 -11.11 -9.05
 -5 -3 -3 -38.70 -12.75
 5 -3 3 37.66 -9.23
 5 -3 3 37.66 -9.23
 -7 -3 -3 -32.48 -9.78
 7 -3 3 32.01 -6.06
 7 -3 3 32.01 -6.06
 7 3 3 -32.48 9.78
 9 -3 3 8.31 0.18
 9 -3 3 8.31 0.18
 -9 -3 -3 -7.92 -2.50
 9 3 3 -7.92 2.50
 11 -3 3 1.15 -3.26
 11 -3 3 1.15 -3.26
 -11 -3 -3 -1.66 5.36
 11 3 3 -1.66 -5.36
 -13 -3 -3 -1.86 3.57
 13 -3 3 2.89 -4.39
 13 -3 3 2.89 -4.39
 13 3 3 -1.86 -3.57
 15 -3 3 3.61 -3.11
 -15 -3 -3 -3.35 -0.61
 15 -3 3 3.61 -3.11
 15 3 3 -3.35 0.61
 17 -3 3 -1.27 -1.18
 17 -3 3 -1.27 -1.18
 -17 -3 -3 0.93 0.18
 17 3 3 0.93 -0.18
 -19 -3 -3 2.91 -0.65
 19 -3 3 -2.64 3.50
 19 3 3 2.91 0.65
 -21 -3 -3 -1.05 0.08
 21 3 3 -1.05 -0.08
 23 3 3 -1.19 -0.64
 25 3 3 0.76 1.02
 30 -4 -3 2.24 1.86
 -30 -4 3 -2.90 -3.06
 30 4 -3 -2.90 3.06
 30 4 -3 -2.90 3.06
 -28 -4 3 -3.53 -0.63
 28 -4 -3 3.70 0.26
 28 4 -3 -3.53 0.63
 28 4 -3 -3.53 0.63
 -26 -4 3 0.55 -0.21
 26 -4 -3 2.03 2.03
 26 4 -3 0.55 0.21
 26 4 -3 0.55 0.21
 24 -4 -3 -1.19 -2.27
 24 -4 -3 -1.19 -2.27
 -24 -4 3 1.86 2.51
 24 4 -3 1.86 -2.51
 24 4 -3 1.86 -2.51
 22 -4 -3 -0.21 0.67
 22 -4 -3 -0.21 0.67
 -22 -4 3 0.35 -0.02
 22 4 -3 0.35 0.02
 22 4 -3 0.35 0.02
 20 -4 -3 -3.60 4.15
 20 -4 -3 -3.60 4.15
 -20 -4 3 3.35 6.83
 20 4 -3 3.35 -6.83
 20 4 -3 3.35 -6.83
 18 -4 -3 -5.61 4.18
 -18 -4 3 5.74 1.06
 18 -4 -3 -5.61 4.18
 18 4 -3 5.74 -1.06
 18 4 -3 5.74 -1.06
 16 -4 -3 -6.62 -1.02
 -16 -4 3 5.32 -1.93
 16 -4 -3 -6.62 -1.02
 16 4 -3 5.32 1.93
 16 4 -3 5.32 1.93
 14 -4 -3 -5.79 -0.25
 -14 -4 3 5.94 3.04
 14 -4 -3 -5.79 -0.25
 14 4 -3 5.94 -3.04
 14 4 -3 5.94 -3.04
 12 -4 -3 -8.60 -2.39
 12 -4 -3 -8.60 -2.39
 -12 -4 3 8.65 1.39
 12 4 -3 8.65 -1.39
 12 4 -3 8.65 -1.39
 -12 4 3 -8.60 2.39
 -10 -4 3 10.85 6.73
 10 -4 -3 -11.41 3.00
 10 4 -3 10.85 -6.73
 -10 4 3 -11.41 -3.00
 10 4 -3 10.85 -6.73
 8 -4 -3 -1.22 4.43
 8 -4 -3 -1.22 4.43
 8 4 -3 0.54 -6.14
 -8 4 3 -1.22 -4.43
 8 4 -3 0.54 -6.14
 6 -4 -3 -13.73 15.47
 -6 4 3 -13.73 -15.47
 6 4 -3 15.29 -22.07
 4 -4 -3 14.63 -6.37
 -4 -4 3 -12.79 -3.31
 4 4 -3 -12.79 3.31
 -4 4 3 14.63 6.37
 4 4 -3 -12.79 3.31
 -2 -4 3 -30.20 -0.10
 2 -4 -3 30.10 -0.51
 2 -4 -3 30.10 -0.51
 -2 -4 3 -30.20 -0.10
 2 4 -3 -30.20 0.10
 -2 4 3 30.10 0.51
 0 -4 -3 31.37 -7.94
 0 -4 -3 31.37 -7.94
 0 -4 3 -31.83 0.29
 0 4 3 31.37 7.94
 -2 -4 -3 39.23 -1.57
 -2 -4 -3 39.23 -1.57
 2 -4 3 -38.84 8.81
 -2 4 -3 -38.84 -8.81
 2 4 3 39.23 1.57
 -4 -4 -3 7.20 -0.35
 4 -4 3 -7.39 1.72
 4 -4 3 -7.39 1.72
 -4 4 -3 -7.39 -1.72
 4 4 3 7.20 0.35
 6 -4 3 -9.82 4.06
 -6 -4 -3 10.88 3.64
 6 -4 3 -9.82 4.06
 -6 -4 -3 10.88 3.64
 -8 -4 -3 4.65 -2.87
 8 4 3 4.65 2.87
 10 -4 3 -4.85 -1.05
 -10 -4 -3 5.31 -4.46
 10 -4 3 -4.85 -1.05
 10 4 3 5.31 4.46
 12 -4 3 -5.00 2.68
 -12 -4 -3 4.77 -3.05
 12 -4 3 -5.00 2.68
 12 4 3 4.77 3.05
 14 -4 3 -4.10 3.49
 14 -4 3 -4.10 3.49
 -14 -4 -3 4.16 1.08
 14 4 3 4.16 -1.08
 16 -4 3 -0.76 1.51
 16 -4 3 -0.76 1.51
 -16 -4 -3 2.79 5.33
 16 4 3 2.79 -5.33
 -18 -4 -3 2.63 -0.03
 18 -4 3 -2.33 1.35
 18 -4 3 -2.33 1.35
 18 4 3 2.63 0.03
 -20 -4 -3 1.06 1.06
 20 -4 3 -1.06 3.48
 20 -4 3 -1.06 3.48
 20 4 3 1.06 -1.06
 22 4 3 -1.83 3.35
 24 4 3 -5.78 2.07
 26 4 3 -5.80 0.91
 29 -5 -3 -5.69 -1.64
 -29 -5 3 5.89 1.02
 29 5 -3 5.89 -1.02
 -27 -5 3 0.61 -0.83
 27 -5 -3 -2.61 3.00
 27 -5 -3 -2.61 3.00
 27 5 -3 0.61 0.83
 27 5 -3 0.61 0.83
 25 -5 -3 5.44 0.43
 -25 -5 3 -5.03 1.17
 25 -5 -3 5.44 0.43
 25 5 -3 -5.03 -1.17
 25 5 -3 -5.03 -1.17
 23 -5 -3 3.13 2.61
 -23 -5 3 -3.78 -2.28
 23 -5 -3 3.13 2.61
 23 5 -3 -3.78 2.28
 23 5 -3 -3.78 2.28
 -21 -5 3 0.63 -1.35
 21 -5 -3 -0.50 1.07
 21 -5 -3 -0.50 1.07
 21 5 -3 0.63 1.35
 21 5 -3 0.63 1.35
 19 -5 -3 -2.80 -7.09
 -19 -5 3 1.59 -2.43
 19 -5 -3 -2.80 -7.09
 19 5 -3 1.59 2.43
 19 5 -3 1.59 2.43
 17 -5 -3 5.21 0.62
 17 -5 -3 5.21 0.62
 -17 -5 3 -4.96 2.85
 17 5 -3 -4.96 -2.85
 17 5 -3 -4.96 -2.85
 15 -5 -3 7.96 5.09
 -15 -5 3 -8.62 -5.67
 15 -5 -3 7.96 5.09
 15 5 -3 -8.62 5.67
 15 5 -3 -8.62 5.67
 -15 5 3 7.96 -5.09
 13 -5 -3 3.29 6.59
 -13 -5 3 -3.66 0.77
 13 -5 -3 3.29 6.59
 13 5 -3 -3.66 -0.77
 13 5 -3 -3.66 -0.77
 -13 5 3 3.29 -6.59
 11 -5 -3 -13.80 -2.62
 -11 -5 3 13.93 -0.45
 11 -5 -3 -13.80 -2.62
 11 5 -3 13.93 0.45
 -11 5 3 -13.80 2.62
 11 5 -3 13.93 0.45
 -9 -5 3 23.92 3.25
 9 -5 -3 -23.47 0.52
 9 5 -3 23.92 -3.25
 -9 5 3 -23.47 -0.52
 9 5 -3 23.92 -3.25
 7 -5 -3 13.41 -13.28
 7 -5 -3 13.41 -13.28
 7 5 -3 -12.48 14.17
 7 5 -3 -12.48 14.17
 -7 5 3 13.41 13.28
 5 -5 -3 18.77 -14.76
 -5 -5 3 -19.96 -11.80
 5 5 -3 -19.96 11.80
 -5 5 3 18.77 14.76
 5 5 -3 -19.96 11.80
 -3 -5 3 -24.79 -3.66
 3 -5 -3 25.20 0.69
 -3 5 3 25.20 -0.69
 3 5 -3 -24.79 3.66
 -1 -5 -3 -15.01 14.12
 -1 -5 -3 -15.01 14.12
 -1 5 -3 15.44 11.59
 1 5 3 -15.01 -14.12
 3 -5 3 26.33 -12.20
 -3 -5 -3 -25.69 0.34
 -3 5 -3 26.33 12.20
 3 5 3 -25.69 -0.34
 -3 5 -3 26.33 12.20
 -5 -5 -3 10.74 2.38
 -5 -5 -3 10.74 2.38
 5 -5 3 -10.27 -2.70
 5 5 3 10.74 -2.38
 -5 5 -3 -10.27 2.70
 7 -5 3 -9.11 -7.93
 -7 -5 -3 8.71 -8.10
 -7 -5 -3 8.71 -8.10
 7 -5 3 -9.11 -7.93
 -7 5 -3 -9.11 7.93
 7 5 3 8.71 8.10
 9 -5 3 -2.30 0.53
 -9 -5 -3 2.46 1.48
 9 -5 3 -2.30 0.53
 9 5 3 2.46 -1.48
 11 -5 3 1.85 -3.24
 -11 -5 -3 -2.38 -2.71
 11 -5 3 1.85 -3.24
 13 -5 3 6.73 1.85
 13 -5 3 6.73 1.85
 -13 -5 -3 -6.50 2.69
 15 -5 3 1.11 -4.35
 15 -5 3 1.11 -4.35
 -15 -5 -3 -1.55 -2.97
 15 5 3 -1.55 2.97
 17 -5 3 4.17 0.68
 17 -5 3 4.17 0.68
 -17 -5 -3 -5.30 0.33
 17 5 3 -5.30 -0.33
 19 -5 3 5.78 -5.94
 19 -5 3 5.78 -5.94
 -19 -5 -3 -6.51 -3.66
 19 5 3 -6.51 3.66
 -21 -5 -3 1.61 1.46
 21 -5 3 -0.80 -6.93
 21 5 3 1.61 -1.46
 23 5 3 6.41 -1.41
 25 5 3 9.07 -0.28
 27 5 3 1.80 -2.84
 -30 -6 3 -3.05 -2.83
 30 -6 -3 3.51 2.50
 30 6 -3 -3.05 2.83
 28 -6 -3 7.31 -1.62
 -28 -6 3 -6.50 -0.50
 28 -6 -3 7.31 -1.62
 28 6 -3 -6.50 0.50
 -26 -6 3 -0.45 -4.45
 26 -6 -3 0.89 -3.04
 26 -6 -3 0.89 -3.04
 26 6 -3 -0.45 4.45
 24 -6 -3 -1.13 0.68
 -24 -6 3 1.33 -1.34
 24 -6 -3 -1.13 0.68
 24 6 -3 1.33 1.34
 -24 6 3 -1.13 -0.68
 24 6 -3 1.33 1.34
 -22 -6 3 -1.23 0.20
 22 -6 -3 1.90 -4.03
 22 -6 -3 1.90 -4.03
 -22 6 3 1.90 4.03
 22 6 -3 -1.23 -0.20
 22 6 -3 -1.23 -0.20
 -20 -6 3 -8.52 -5.25
 20 -6 -3 8.74 2.48
 20 -6 -3 8.74 2.48
 20 6 -3 -8.52 5.25
 20 6 -3 -8.52 5.25
 18 -6 -3 5.88 4.39
 18 -6 -3 5.88 4.39
 -18 -6 3 -5.85 -3.17
 -18 6 3 5.88 -4.39
 18 6 -3 -5.85 3.17
 18 6 -3 -5.85 3.17
 16 -6 -3 -3.18 -5.71
 -16 -6 3 2.97 2.78
 16 -6 -3 -3.18 -5.71
 16 6 -3 2.97 -2.78
 -16 6 3 -3.18 5.71
 16 6 -3 2.97 -2.78
 14 -6 -3 -3.43 -5.86
 -14 -6 3 2.74 3.63
 14 -6 -3 -3.43 -5.86
 14 6 -3 2.74 -3.63
 14 6 -3 2.74 -3.63
 -14 6 3 -3.43 5.86
 12 -6 -3 15.59 -2.16
 -12 -6 3 -15.26 2.95
 12 -6 -3 15.59 -2.16
 12 6 -3 -15.26 -2.95
 12 6 -3 -15.26 -2.95
 -12 6 3 15.59 2.16
 10 -6 -3 33.73 1.93
 -10 -6 3 -33.73 -8.15
 10 -6 -3 33.73 1.93
 10 6 -3 -33.73 8.15
 10 6 -3 -33.73 8.15
 -10 6 3 33.73 -1.93
 8 -6 -3 25.25 -3.31
 -8 6 3 25.25 3.31
 8 6 -3 -25.75 1.51
 8 6 -3 -25.75 1.51
 -6 -6 3 0.55 -1.87
 6 -6 -3 -1.28 2.00
 6 -6 -3 -1.28 2.00
 6 6 -3 0.55 1.87
 -6 6 3 -1.28 -2.00
 -4 -6 3 3.57 5.91
 4 -6 -3 -3.93 4.23
 -4 6 3 -3.93 -4.23
 4 6 -3 3.57 -5.91
 2 -6 -3 -1.90 2.71
 -2 -6 3 0.98 4.44
 2 -6 -3 -1.90 2.71
 -2 -6 3 0.98 4.44
 -2 -6 3 0.98 4.44
 -2 6 3 -1.90 -2.71
 0 -6 -3 8.71 -4.95
 0 -6 3 -10.33 8.84
 0 -6 -3 8.71 -4.95
 0 6 -3 -10.33 -8.84
 0 6 3 8.71 4.95
 -2 -6 -3 18.35 -5.07
 2 -6 3 -18.78 10.70
 -2 -6 -3 18.35 -5.07
 -2 6 -3 -18.78 -10.70
 2 6 3 18.35 5.07
 4 -6 3 0.28 2.08
 4 -6 3 0.28 2.08
 -4 -6 -3 -1.47 -2.55
 -4 -6 -3 -1.47 -2.55
 4 6 3 -1.47 2.55
 -4 6 -3 0.28 -2.08
 -4 6 -3 0.28 -2.08
 -6 -6 -3 -14.09 -3.10
 -6 -6 -3 -14.09 -3.10
 6 -6 3 14.97 2.56
 6 -6 3 14.97 2.56
 6 6 3 -14.09 3.10
 -6 6 -3 14.97 -2.56
 8 -6 3 7.69 -1.24
 -8 -6 -3 -6.93 2.78
 8 -6 3 7.69 -1.24
 -8 -6 -3 -6.93 2.78
 -8 6 -3 7.69 1.24
 8 6 3 -6.93 -2.78
 -10 -6 -3 -1.54 -3.20
 10 -6 3 1.56 -2.07
 -10 -6 -3 -1.54 -3.20
 10 -6 3 1.56 -2.07
 -10 6 -3 1.56 2.07
 12 -6 3 0.65 -4.46
 12 -6 3 0.65 -4.46
 -12 -6 -3 0.29 -0.02
 -12 6 -3 0.65 4.46
 14 -6 3 4.00 2.37
 14 -6 3 4.00 2.37
 -14 -6 -3 -4.46 0.22
 14 6 3 -4.46 -0.22
 16 -6 3 0.22 -0.93
 -16 -6 -3 -0.42 -5.70
 16 -6 3 0.22 -0.93
 16 6 3 -0.42 5.70
 18 -6 3 -7.22 -1.12
 18 -6 3 -7.22 -1.12
 -18 -6 -3 8.29 1.85
 18 6 3 8.29 -1.85
 -20 -6 -3 3.72 3.27
 20 -6 3 -3.00 6.80
 20 6 3 3.72 -3.27
 22 6 3 -4.00 0.69
 24 6 3 -5.70 -1.35
 26 6 3 -4.94 3.32
 -29 -7 3 3.41 1.75
 29 -7 -3 -4.17 -1.35
 29 -7 -3 -4.17 -1.35
 29 7 -3 3.41 -1.75
 27 -7 -3 -3.63 1.00
 -27 -7 3 3.52 3.49
 27 -7 -3 -3.63 1.00
 27 7 -3 3.52 -3.49
 -25 -7 3 -0.75 5.65
 25 -7 -3 -0.94 -2.14
 25 -7 -3 -0.94 -2.14
 25 7 -3 -0.75 -5.65
 23 -7 -3 -2.10 -3.46
 23 -7 -3 -2.10 -3.46
 -23 -7 3 0.95 2.89
 -23 7 3 -2.10 3.46
 23 7 -3 0.95 -2.89
 -21 -7 3 3.34 6.53
 21 -7 -3 -4.05 -5.47
 21 -7 -3 -4.05 -5.47
 21 7 -3 3.34 -6.53
 -21 7 3 -4.05 5.47
 -19 -7 3 7.00 7.14
 19 -7 -3 -6.91 -3.66
 19 -7 -3 -6.91 -3.66
 19 7 -3 7.00 -7.14
 -19 7 3 -6.91 3.66
 17 -7 -3 -3.13 0.41
 17 -7 -3 -3.13 0.41
 -17 -7 3 3.47 -2.80
 -17 7 3 -3.13 -0.41
 17 7 -3 3.47 2.80
 15 -7 -3 2.58 6.65
 15 -7 -3 2.58 6.65
 -15 -7 3 -1.92 -0.97
 15 7 -3 -1.92 0.97
 -15 7 3 2.58 -6.65
 -13 -7 3 -0.36 -11.76
 13 -7 -3 -0.02 4.27
 13 -7 -3 -0.02 4.27
 13 7 -3 -0.36 11.76
 -13 7 3 -0.02 -4.27
 11 -7 -3 -4.48 -1.04
 11 -7 -3 -4.48 -1.04
 -11 -7 3 4.07 -1.26
 -11 7 3 -4.48 1.04
 11 7 -3 4.07 1.26
 9 -7 -3 -0.56 -1.52
 9 -7 -3 -0.56 -1.52
 -9 -7 3 0.69 -3.60
 9 7 -3 0.69 3.60
 -9 7 3 -0.56 1.52
 7 -7 -3 5.45 3.53
 7 7 -3 -4.88 -4.07
 -5 -7 3 -5.38 -1.31
 5 -7 -3 5.93 3.00
 -5 -7 3 -5.38 -1.31
 -5 7 3 5.93 -3.00
 5 7 -3 -5.38 1.31
 -3 -7 3 6.62 -1.37
 -3 -7 3 6.62 -1.37
 3 -7 -3 -6.73 -4.03
 -3 7 3 -6.73 4.03
 1 -7 -3 7.95 1.16
 -1 -7 3 -6.51 -4.31
 -1 7 3 7.95 -1.16
 1 7 -3 -6.51 4.31
 -1 -7 -3 -1.70 3.20
 -1 -7 -3 -1.70 3.20
 1 -7 3 2.91 0.83
 -1 7 -3 2.91 -0.83
 1 7 3 -1.70 -3.20
 3 -7 3 -8.21 4.34
 -3 -7 -3 9.58 8.24
 -3 -7 -3 9.58 8.24
 3 7 3 9.58 -8.24
 -3 7 -3 -8.21 -4.34
 -5 -7 -3 16.20 0.54
 -5 -7 -3 16.20 0.54
 5 -7 3 -16.73 -3.40
 5 -7 3 -16.73 -3.40
 -5 7 -3 -16.73 3.40
 5 7 3 16.20 -0.54
 7 -7 3 -8.45 -3.49
 7 -7 3 -8.45 -3.49
 -7 -7 -3 7.59 4.25
 -7 -7 -3 7.59 4.25
 7 7 3 7.59 -4.25
 -7 7 -3 -8.45 3.49
 -9 -7 -3 -2.74 -3.58
 9 -7 3 4.04 -2.64
 -9 -7 -3 -2.74 -3.58
 9 -7 3 4.04 -2.64
 9 7 3 -2.74 3.58
 -9 7 -3 4.04 2.64
 -11 -7 -3 -1.27 6.59
 -11 -7 -3 -1.27 6.59
 11 -7 3 1.36 4.29
 11 -7 3 1.36 4.29
 11 7 3 -1.27 -6.59
 -11 7 -3 1.36 -4.29
 13 -7 3 -9.99 -4.51
 -13 -7 -3 9.69 -5.27
 13 -7 3 -9.99 -4.51
 -13 -7 -3 9.69 -5.27
 -13 7 -3 -9.99 4.51
 13 7 3 9.69 5.27
 15 -7 3 -8.55 2.75
 15 -7 3 -8.55 2.75
 -15 -7 -3 9.10 8.89
 15 7 3 9.10 -8.89
 -15 7 -3 -8.55 -2.75
 17 -7 3 -1.32 5.28
 -17 -7 -3 1.68 5.82
 17 -7 3 -1.32 5.28
 17 7 3 1.68 -5.82
 -17 7 -3 -1.32 -5.28
 19 -7 3 3.59 -0.10
 19 -7 3 3.59 -0.10
 -19 -7 -3 -3.61 -0.44
 -19 7 -3 3.59 0.10
 19 7 3 -3.61 0.44
 -21 -7 -3 -0.28 -1.97
 21 7 3 -0.28 1.97
 -21 7 -3 -0.27 1.20
 -23 7 -3 -1.20 1.35
 23 7 3 4.20 -3.06
 -25 7 -3 -0.46 6.22
 25 7 3 5.24 -5.66
 -28 -8 3 -2.55 -5.06
 28 -8 -3 2.59 4.78
 28 8 -3 -2.55 5.06
 -26 -8 3 -0.42 -7.81
 26 -8 -3 0.78 8.45
 26 -8 -3 0.78 8.45
 26 8 -3 -0.42 7.81
 -24 -8 3 0.81 -7.02
 24 -8 -3 0.73 6.84
 24 -8 -3 0.73 6.84
 24 8 -3 0.81 7.02
 -22 -8 3 -2.05 -7.83
 22 -8 -3 3.16 9.08
 22 -8 -3 3.16 9.08
 22 8 -3 -2.05 7.83
 -22 8 3 3.16 -9.08
 -20 -8 3 -3.37 -4.49
 20 -8 -3 3.65 6.68
 20 -8 -3 3.65 6.68
 20 8 -3 -3.37 4.49
 -20 8 3 3.65 -6.68
 18 -8 -3 5.34 2.26
 -18 -8 3 -5.93 -0.84
 18 -8 -3 5.34 2.26
 18 8 -3 -5.93 0.84
 -18 8 3 5.34 -2.26
 16 -8 -3 4.26 3.23
 16 -8 -3 4.26 3.23
 -16 -8 3 -4.43 -2.07
 16 8 -3 -4.43 2.07
 -16 8 3 4.26 -3.23
 14 -8 -3 4.23 -0.43
 14 -8 -3 4.23 -0.43
 -14 -8 3 -4.07 -0.11
 -14 8 3 4.23 0.43
 14 8 -3 -4.07 0.11
 12 -8 -3 -2.15 -1.88
 12 -8 -3 -2.15 -1.88
 -12 -8 3 2.40 -0.74
 12 8 -3 2.40 0.74
 -12 8 3 -2.15 1.88
 10 -8 -3 0.01 1.22
 -10 -8 3 -0.27 1.93
 10 -8 -3 0.01 1.22
 -10 8 3 0.01 -1.22
 10 8 -3 -0.27 -1.93
 8 -8 -3 -6.99 -1.71
 8 -8 -3 -6.99 -1.71
 -8 -8 3 6.98 0.87
 -8 8 3 -6.99 1.71
 8 8 -3 6.98 -0.87
 6 -8 -3 8.54 2.79
 -6 -8 3 -9.07 1.44
 6 -8 -3 8.54 2.79
 -6 -8 3 -9.07 1.44
 6 8 -3 -9.07 -1.44
 -6 8 3 8.54 -2.79
 4 -8 -3 11.58 1.70
 -4 -8 3 -11.14 6.22
 -4 -8 3 -11.14 6.22
 4 8 -3 -11.14 -6.22
 -4 8 3 11.58 -1.70
 -2 -8 3 -3.84 1.71
 2 -8 -3 3.27 2.12
 -2 -8 3 -3.84 1.71
 -2 -8 3 -3.84 1.71
 -2 8 3 3.27 -2.12
 2 8 -3 -3.84 -1.71
 0 -8 -3 -2.20 -0.22
 0 -8 -3 -2.20 -0.22
 0 -8 3 0.84 -1.06
 0 8 3 -2.20 0.22
 0 8 -3 0.84 1.06
 -2 -8 -3 1.90 -6.19
 2 -8 3 -2.10 -3.51
 -2 -8 -3 1.90 -6.19
 2 8 3 1.90 6.19
 -2 8 -3 -2.10 3.51
 4 -8 3 -1.64 5.95
 -4 -8 -3 2.01 5.96
 -4 -8 -3 2.01 5.96
 -4 8 -3 -1.64 -5.95
 4 8 3 2.01 -5.96
 6 -8 3 6.12 20.88
 -6 -8 -3 -4.44 16.87
 6 -8 3 6.12 20.88
 -6 -8 -3 -4.44 16.87
 6 8 3 -4.44 -16.87
 -6 8 -3 6.12 -20.88
 8 -8 3 -13.42 9.00
 -8 -8 -3 12.67 9.23
 8 -8 3 -13.42 9.00
 -8 -8 -3 12.67 9.23
 8 8 3 12.67 -9.23
 -8 8 -3 -13.42 -9.00
 -10 -8 -3 8.52 3.00
 -10 -8 -3 8.52 3.00
 10 -8 3 -9.13 -1.30
 10 -8 3 -9.13 -1.30
 -10 8 -3 -9.13 1.30
 10 8 3 8.52 -3.00
 -12 -8 -3 1.52 0.18
 12 -8 3 -1.64 1.35
 -12 -8 -3 1.52 0.18
 12 -8 3 -1.64 1.35
 -12 8 -3 -1.64 -1.35
 12 8 3 1.52 -0.18
 -14 -8 -3 -4.18 -1.98
 14 -8 3 4.26 -1.62
 -14 -8 -3 -4.18 -1.98
 -14 8 -3 4.26 1.62
 14 8 3 -4.18 1.98
 -16 -8 -3 -7.24 -7.66
 -16 -8 -3 -7.24 -7.66
 16 -8 3 5.69 -1.73
 -16 8 -3 5.69 1.73
 16 8 3 -7.24 7.66
 -18 -8 -3 -4.61 -2.69
 18 -8 3 3.01 -1.50
 -18 8 -3 3.01 1.50
 18 8 3 -4.61 2.69
 -20 -8 -3 -1.21 5.39
 -20 -8 -3 -1.21 5.39
 20 8 3 -1.21 -5.39
 -20 8 -3 0.80 2.54
 -22 -8 -3 -0.94 2.83
 -22 8 -3 0.26 -0.34
 22 8 3 -0.94 -2.83
 -24 -8 -3 -4.90 -4.59
 24 8 3 -4.90 4.59
 -24 8 -3 1.58 -2.02
 -27 -9 3 2.77 7.54
 27 -9 -3 -2.08 -8.09
 27 9 -3 2.77 -7.54
 25 -9 -3 -2.73 -8.74
 -25 -9 3 3.24 4.43
 25 9 -3 3.24 -4.43
 -23 -9 3 -1.18 2.27
 23 -9 -3 0.18 -1.97
 23 9 -3 -1.18 -2.27
 -21 -9 3 3.15 -1.62
 21 -9 -3 -3.21 -3.04
 21 -9 -3 -3.21 -3.04
 -21 9 3 -3.21 3.04
 21 9 -3 3.15 1.62
 19 -9 -3 1.22 3.60
 -19 -9 3 -0.76 -6.17
 19 -9 -3 1.22 3.60
 -19 9 3 1.22 -3.60
 19 9 -3 -0.76 6.17
 -17 -9 3 0.67 -1.35
 17 -9 -3 0.08 -0.72
 17 -9 -3 0.08 -0.72
 -17 9 3 0.08 0.72
 17 9 -3 0.67 1.35
 15 -9 -3 1.43 -0.02
 -15 -9 3 -2.20 3.06
 15 -9 -3 1.43 -0.02
 15 9 -3 -2.20 -3.06
 -15 9 3 1.43 0.02
 13 -9 -3 2.18 -1.29
 -13 -9 3 -3.17 -0.55
 13 -9 -3 2.18 -1.29
 -13 9 3 2.18 1.29
 13 9 -3 -3.17 0.55
 11 -9 -3 2.17 -1.33
 11 -9 -3 2.17 -1.33
 -11 -9 3 -2.84 -1.72
 -11 9 3 2.17 1.33
 11 9 -3 -2.84 1.72
 9 -9 -3 4.21 -2.31
 -9 -9 3 -3.92 -3.47
 9 -9 -3 4.21 -2.31
 -9 -9 3 -3.92 -3.47
 9 9 -3 -3.92 3.47
 -9 9 3 4.21 2.31
 -7 9 3 -2.33 2.67
 -5 -9 3 12.32 -0.93
 5 -9 -3 -10.73 -3.68
 -5 9 3 -10.73 3.68
 3 -9 -3 -0.85 1.91
 -3 -9 3 1.25 -2.98
 3 -9 -3 -0.85 1.91
 -3 -9 3 1.25 -2.98
 3 9 -3 1.25 2.98
 -3 9 3 -0.85 -1.91
 1 -9 -3 2.30 -3.85
 -1 -9 3 -1.60 0.11
 1 -9 -3 2.30 -3.85
 -1 9 3 2.30 3.85
 1 9 -3 -1.60 -0.11
 -1 -9 -3 4.88 1.33
 -1 -9 -3 4.88 1.33
 1 -9 3 -5.09 3.05
 -1 9 -3 -5.09 -3.05
 1 9 3 4.88 -1.33
 -3 -9 -3 -0.21 -1.50
 3 -9 3 -0.97 1.10
 -3 -9 -3 -0.21 -1.50
 -3 9 -3 -0.97 -1.10
 3 9 3 -0.21 1.50
 5 -9 3 -3.13 -9.90
 -5 -9 -3 2.54 -9.36
 -5 -9 -3 2.54 -9.36
 5 9 3 2.54 9.36
 -5 9 -3 -3.13 9.90
 -7 -9 -3 0.54 -10.42
 -7 -9 -3 0.54 -10.42
 7 -9 3 -0.98 -9.56
 7 9 3 0.54 10.42
 -7 9 -3 -0.98 9.56
 -9 -9 -3 -4.50 0.99
 -9 -9 -3 -4.50 0.99
 9 -9 3 4.65 2.66
 9 9 3 -4.50 -0.99
 -9 9 -3 4.65 -2.66
 -11 -9 -3 1.26 1.96
 11 -9 3 -0.35 1.86
 -11 -9 -3 1.26 1.96
 -11 9 -3 -0.35 -1.86
 11 9 3 1.26 -1.96
 13 -9 3 1.06 -1.49
 -13 -9 -3 -1.49 2.42
 -13 -9 -3 -1.49 2.42
 13 9 3 -1.49 -2.42
 -13 9 -3 1.06 1.49
 15 -9 3 0.08 -4.92
 -15 -9 -3 1.05 5.90
 -15 -9 -3 1.05 5.90
 -15 9 -3 0.08 4.92
 15 9 3 1.05 -5.90
 -17 -9 -3 3.21 10.77
 17 -9 3 -1.86 -10.40
 -17 -9 -3 3.21 10.77
 -17 9 -3 -1.86 10.40
 17 9 3 3.21 -10.77
 19 -9 3 -0.07 0.29
 -19 -9 -3 1.25 -0.50
 -19 -9 -3 1.25 -0.50
 19 9 3 1.25 0.50
 -19 9 -3 -0.07 -0.29
 -21 -9 -3 -1.05 -3.81
 -21 -9 -3 -1.05 -3.81
 -21 9 -3 1.55 0.93
 21 9 3 -1.05 3.81
 -23 -9 -3 -0.97 -1.05
 -23 9 -3 2.23 -1.27
 23 9 3 -0.97 1.05
 -26 -10 3 -0.46 -3.53
 26 -10 -3 0.41 3.99
 26 10 -3 -0.46 3.53
 24 -10 -3 -0.43 2.59
 -24 -10 3 1.18 0.51
 24 10 -3 1.18 -0.51
 -22 -10 3 -3.08 -0.84
 22 -10 -3 3.35 -1.07
 22 10 -3 -3.08 0.84
 -20 -10 3 -0.51 3.50
 20 -10 -3 0.42 -2.84
 20 10 -3 -0.51 -3.50
 -20 10 3 0.42 2.84
 18 -10 -3 -0.95 -5.99
 -18 -10 3 -1.10 0.23
 18 10 -3 -1.10 -0.23
 -18 10 3 -0.95 5.99
 -16 -10 3 -1.05 -4.71
 16 -10 -3 -1.14 -1.15
 16 10 -3 -1.05 4.71
 -16 10 3 -1.14 1.15
 14 -10 -3 -2.84 -2.21
 -14 -10 3 3.33 -4.88
 14 -10 -3 -2.84 -2.21
 14 10 -3 3.33 4.88
 -14 10 3 -2.84 2.21
 12 -10 -3 -0.64 5.09
 -12 -10 3 1.93 7.92
 -12 -10 3 1.93 7.92
 12 -10 -3 -0.64 5.09
 12 10 -3 1.93 -7.92
 -12 10 3 -0.64 -5.09
 -10 -10 3 0.68 6.31
 10 -10 -3 0.87 3.13
 10 -10 -3 0.87 3.13
 -10 -10 3 0.68 6.31
 -10 10 3 0.87 -3.13
 10 10 -3 0.68 -6.31
 -8 -10 3 3.28 3.98
 8 -10 -3 -3.08 4.45
 -8 -10 3 3.28 3.98
 8 -10 -3 -3.08 4.45
 8 10 -3 3.28 -3.98
 -8 10 3 -3.08 -4.45
 -6 -10 3 -3.21 0.00
 -6 -10 3 -3.21 0.00
 6 -10 -3 2.69 2.27
 6 -10 -3 2.69 2.27
 -6 10 3 2.69 -2.27
 6 10 -3 -3.21 0.00
 4 -10 -3 -0.12 -3.23
 -4 -10 3 -0.36 0.91
 4 -10 -3 -0.12 -3.23
 4 10 -3 -0.36 -0.91
 -4 10 3 -0.12 3.23
 2 -10 -3 -2.29 2.70
 2 -10 -3 -2.29 2.70
 -2 -10 3 3.12 6.31
 -2 10 3 -2.29 -2.70
 2 10 -3 3.12 -6.31
 0 -10 -3 -4.32 -0.60
 0 -10 3 4.15 0.02
 0 -10 -3 -4.32 -0.60
 0 10 -3 4.15 -0.02
 0 10 3 -4.32 0.60
 -2 -10 -3 -4.63 0.25
 2 -10 3 5.63 -3.53
 -2 -10 -3 -4.63 0.25
 -2 10 -3 5.63 3.53
 2 10 3 -4.63 -0.25
 -4 -10 -3 -3.95 -1.63
 4 -10 3 3.80 0.02
 -4 -10 -3 -3.95 -1.63
 4 10 3 -3.95 1.63
 -4 10 -3 3.80 -0.02
 6 -10 3 4.00 -3.55
 -6 -10 -3 -3.33 -1.41
 -6 -10 -3 -3.33 -1.41
 -6 10 -3 4.00 3.55
 6 10 3 -3.33 1.41
 8 -10 3 0.78 -2.31
 -8 -10 -3 -0.50 2.97
 -8 -10 -3 -0.50 2.97
 -8 10 -3 0.78 2.31
 8 10 3 -0.50 -2.97
 -10 -10 -3 -2.61 -1.67
 -10 -10 -3 -2.61 -1.67
 10 -10 3 2.76 -4.95
 10 10 3 -2.61 1.67
 -10 10 -3 2.76 4.95
 12 -10 3 2.45 -1.87
 -12 -10 -3 -1.97 2.07
 -12 -10 -3 -1.97 2.07
 -12 10 -3 2.45 1.87
 12 10 3 -1.97 -2.07
 14 -10 3 -0.95 1.29
 -14 -10 -3 1.19 2.17
 -14 -10 -3 1.19 2.17
 14 10 3 1.19 -2.17
 -14 10 -3 -0.95 -1.29
 -16 -10 -3 4.38 -5.87
 16 -10 3 -4.89 5.47
 -16 -10 -3 4.38 -5.87
 -16 10 -3 -4.89 -5.47
 16 10 3 4.38 5.87
 -18 -10 -3 -0.13 -3.62
 -18 -10 -3 -0.13 -3.62
 18 -10 3 -1.19 0.95
 -18 10 -3 -1.19 -0.95
 18 10 3 -0.13 3.62
 -20 -10 -3 2.42 2.48
 -20 -10 -3 2.42 2.48
 -20 10 -3 -3.55 1.85
 20 10 3 2.42 -2.48
 -22 -10 -3 1.92 3.22
 22 10 3 1.92 -3.22
 -22 10 -3 -2.35 3.13
 -25 -11 3 -3.53 1.21
 25 -11 -3 3.76 0.66
 25 11 -3 -3.53 -1.21
 23 -11 -3 -2.24 -0.31
 -23 -11 3 2.41 3.54
 23 11 -3 2.41 -3.54
 21 -11 -3 -4.81 3.60
 -21 -11 3 3.70 3.71
 21 11 -3 3.70 -3.71
 -19 -11 3 1.17 1.94
 19 -11 -3 -1.53 3.45
 19 11 -3 1.17 -1.94
 -19 11 3 -1.53 -3.45
 -17 -11 3 6.22 8.17
 17 -11 -3 -4.48 6.30
 17 11 -3 6.22 -8.17
 -17 11 3 -4.48 -6.30
 -15 -11 3 3.58 4.80
 15 -11 -3 -2.72 0.14
 -15 -11 3 3.58 4.80
 -15 11 3 -2.72 -0.14
 15 11 -3 3.58 -4.80
 -13 -11 3 0.74 4.23
 -13 -11 3 0.74 4.23
 13 -11 -3 -1.33 3.17
 13 11 -3 0.74 -4.23
 -13 11 3 -1.33 -3.17
 -11 -11 3 1.83 -4.19
 11 -11 -3 -3.09 -2.75
 -11 -11 3 1.83 -4.19
 11 11 -3 1.83 4.19
 -11 11 3 -3.09 2.75
 9 -11 -3 -1.63 3.40
 -9 -11 3 0.84 0.28
 9 11 -3 0.84 -0.28
 -9 11 3 -1.63 -3.40
 7 -11 -3 1.55 -0.77
 -7 -11 3 -1.90 1.60
 -7 11 3 1.55 0.77
 7 11 -3 -1.90 -1.60
 5 -11 -3 2.17 3.99
 5 -11 -3 2.17 3.99
 -5 -11 3 -2.25 1.68
 5 11 -3 -2.25 -1.68
 -5 11 3 2.17 -3.99
 3 -11 -3 3.47 -2.03
 -3 -11 3 -4.15 -3.30
 3 -11 -3 3.47 -2.03
 -3 11 3 3.47 2.03
 3 11 -3 -4.15 3.30
 1 -11 -3 6.54 -1.14
 -1 -11 3 -5.95 -2.54
 1 -11 -3 6.54 -1.14
 1 11 -3 -5.95 2.54
 -1 11 3 6.54 1.14
 1 -11 3 -3.46 3.25
 -1 -11 -3 3.58 2.19
 -1 -11 -3 3.58 2.19
 -1 11 -3 -3.46 -3.25
 1 11 3 3.58 -2.19
 -3 -11 -3 1.88 0.58
 -3 -11 -3 1.88 0.58
 3 -11 3 -1.77 1.71
 3 11 3 1.88 -0.58
 -3 11 -3 -1.77 -1.71
 -5 -11 -3 3.68 0.63
 -5 -11 -3 3.68 0.63
 5 -11 3 -3.48 1.64
 5 11 3 3.68 -0.63
 -5 11 -3 -3.48 -1.64
 -7 -11 -3 0.76 -0.27
 7 -11 3 -0.69 3.85
 -7 -11 -3 0.76 -0.27
 7 11 3 0.76 0.27
 -7 11 -3 -0.69 -3.85
 -9 -11 -3 -0.70 -2.70
 -9 -11 -3 -0.70 -2.70
 9 -11 3 2.07 3.63
 -9 11 -3 2.07 -3.63
 9 11 3 -0.70 2.70
 -11 -11 -3 0.33 0.81
 -11 -11 -3 0.33 0.81
 11 -11 3 -0.22 2.57
 11 11 3 0.33 -0.81
 -11 11 -3 -0.22 -2.57
 13 -11 3 1.41 3.61
 -13 -11 -3 -1.06 1.22
 -13 -11 -3 -1.06 1.22
 -13 11 -3 1.41 -3.61
 13 11 3 -1.06 -1.22
 -15 -11 -3 -3.34 -1.43
 15 -11 3 2.75 -0.65
 -15 -11 -3 -3.34 -1.43
 -15 11 -3 2.75 0.65
 15 11 3 -3.34 1.43
 -17 -11 -3 -1.97 1.12
 -17 -11 -3 -1.97 1.12
 17 -11 3 2.59 0.73
 17 11 3 -1.97 -1.12
 -17 11 -3 2.59 -0.73
 -19 -11 -3 -0.03 1.90
 -19 -11 -3 -0.03 1.90
 19 11 3 -0.03 -1.90
 -19 11 -3 0.33 1.20
 -21 -11 -3 -3.04 -4.72
 -21 -11 -3 -3.04 -4.72
 -21 11 -3 2.69 -3.54
 21 11 3 -3.04 4.72
 24 -12 -3 -0.54 -2.05
 24 12 -3 0.13 0.23
 -22 -12 3 -2.06 -3.45
 -22 -12 3 -2.06 -3.45
 22 -12 -3 2.08 0.40
 22 12 -3 -2.06 3.45
 -20 -12 3 -3.05 0.65
 20 -12 -3 3.85 0.35
 20 12 -3 -3.05 -0.65
 18 -12 -3 0.92 -1.99
 -18 -12 3 -0.62 -3.78
 -18 12 3 0.92 1.99
 18 12 -3 -0.62 3.78
 16 -12 -3 0.58 -2.76
 -16 -12 3 -1.64 -1.46
 16 12 -3 -1.64 1.46
 -16 12 3 0.58 2.76
 -14 -12 3 -0.01 1.43
 14 -12 -3 -0.44 -2.18
 14 12 -3 -0.01 -1.43
 -14 12 3 -0.44 2.18
 -12 -12 3 0.05 0.99
 12 -12 -3 -0.36 -0.05
 12 12 -3 0.05 -0.99
 -12 12 3 -0.36 0.05
 10 -12 -3 0.18 2.57
 -10 -12 3 0.17 4.40
 10 12 -3 0.17 -4.40
 -10 12 3 0.18 -2.57
 -8 -12 3 -2.88 -1.18
 8 -12 -3 2.44 1.13
 8 12 -3 -2.88 1.18
 -8 12 3 2.44 -1.13
 -6 -12 3 1.88 -5.24
 6 -12 -3 -1.72 0.39
 -6 12 3 -1.72 -0.39
 6 12 -3 1.88 5.24
 4 -12 -3 -1.09 2.38
 -4 -12 3 1.68 3.97
 4 12 -3 1.68 -3.97
 -4 12 3 -1.09 -2.38
 2 -12 -3 -1.86 3.38
 -2 -12 3 1.14 3.17
 -2 12 3 -1.86 -3.38
 2 12 -3 1.14 -3.17
 0 -12 3 0.05 3.58
 0 -12 -3 -0.88 1.75
 0 12 -3 0.05 -3.58
 0 12 3 -0.88 -1.75
 -2 -12 -3 0.11 -1.14
 -2 -12 -3 0.11 -1.14
 2 -12 3 -0.21 -2.02
 2 12 3 0.11 1.14
 -2 12 -3 -0.21 2.02
 4 -12 3 1.31 0.27
 -4 -12 -3 -1.46 1.63
 -4 -12 -3 -1.46 1.63
 -4 12 -3 1.31 -0.27
 4 12 3 -1.46 -1.63
 6 -12 3 0.46 0.55
 -6 -12 -3 -1.35 -1.25
 -6 -12 -3 -1.35 -1.25
 6 12 3 -1.35 1.25
 -6 12 -3 0.46 -0.55
 -8 -12 -3 -0.21 0.23
 8 -12 3 -0.20 -1.98
 -8 -12 -3 -0.21 0.23
 8 12 3 -0.21 -0.23
 -8 12 -3 -0.20 1.98
 10 -12 3 -1.87 1.15
 -10 -12 -3 0.53 1.98
 -10 -12 -3 0.53 1.98
 10 12 3 0.53 -1.98
 -10 12 -3 -1.87 -1.15
 12 -12 3 -0.43 0.39
 -12 -12 -3 0.72 -2.42
 -12 -12 -3 0.72 -2.42
 12 12 3 0.72 2.42
 -12 12 -3 -0.43 -0.39
 -14 -12 -3 1.63 -0.14
 -14 -12 -3 1.63 -0.14
 14 -12 3 -0.97 -0.33
 -14 12 -3 -0.97 0.33
 14 12 3 1.63 0.14
 -16 -12 -3 -2.49 3.53
 -16 -12 -3 -2.49 3.53
 16 -12 3 2.81 1.16
 16 12 3 -2.49 -3.53
 -16 12 -3 2.81 -1.16
 -18 -12 -3 0.22 -6.06
 -18 -12 -3 0.22 -6.06
 -18 12 -3 0.78 -4.47
 18 12 3 0.22 6.06
 -20 -12 -3 -0.40 -0.48
 20 12 3 -0.40 0.48
 -20 12 -3 1.23 -0.72
 -21 -13 3 3.22 2.70
 21 -13 -3 -1.88 -5.57
 21 13 -3 3.22 -2.70
 -19 -13 3 4.59 0.64
 19 -13 -3 -4.90 -5.71
 19 13 -3 4.59 -0.64
 -17 -13 3 0.77 -0.26
 17 -13 -3 -0.37 -4.15
 17 13 -3 0.77 0.26
 -17 13 3 -0.37 4.15
 -15 -13 3 -0.04 0.97
 15 -13 -3 -0.29 1.36
 15 13 -3 -0.04 -0.97
 -15 13 3 -0.29 -1.36
 -13 -13 3 -5.40 -1.36
 13 -13 -3 5.22 0.30
 13 13 -3 -5.40 1.36
 -13 13 3 5.22 -0.30
 -11 -13 3 -1.63 -1.15
 11 -13 -3 1.32 -2.52
 11 13 -3 -1.63 1.15
 -11 13 3 1.32 2.52
 -9 -13 3 -1.10 -1.19
 9 -13 -3 1.22 -4.24
 9 13 -3 -1.10 1.19
 -9 13 3 1.22 4.24
 7 -13 -3 0.57 -0.19
 -7 -13 3 0.23 2.22
 7 13 -3 0.23 -2.22
 -7 13 3 0.57 0.19
 5 -13 -3 2.67 -2.34
 -5 -13 3 -2.89 1.72
 5 13 -3 -2.89 -1.72
 -5 13 3 2.67 2.34
 -3 -13 3 -0.44 -4.91
 3 -13 -3 0.65 -0.87
 -3 13 3 0.65 0.87
 3 13 -3 -0.44 4.91
 -1 -13 3 1.98 -5.66
 1 -13 -3 -1.05 -3.50
 1 13 -3 1.98 5.66
 -1 13 3 -1.05 3.50
 -1 -13 -3 0.42 0.05
 1 -13 3 0.32 -2.56
 -1 13 -3 0.32 2.56
 1 13 3 0.42 -0.05
 3 -13 3 -1.41 0.55
 -3 -13 -3 0.93 -1.90
 -3 13 -3 -1.41 -0.55
 3 13 3 0.93 1.90
 -5 -13 -3 1.87 1.39
 5 -13 3 -1.27 1.80
 -5 13 -3 -1.27 -1.80
 5 13 3 1.87 -1.39
 -7 -13 -3 0.71 -1.10
 7 -13 3 -0.53 3.49
 7 13 3 0.71 1.10
 -7 13 -3 -0.53 -3.49
 9 -13 3 1.63 4.42
 -9 -13 -3 -0.19 -2.51
 9 13 3 -0.19 2.51
 -9 13 -3 1.63 -4.42
 -11 -13 -3 0.71 -2.61
 11 -13 3 -1.28 -2.48
 -11 -13 -3 0.71 -2.61
 -11 13 -3 -1.28 2.48
 11 13 3 0.71 2.61
 13 -13 3 -0.69 0.74
 -13 -13 -3 -0.31 -4.03
 -13 -13 -3 -0.31 -4.03
 13 13 3 -0.31 4.03
 -13 13 -3 -0.69 -0.74
 -15 -13 -3 0.21 -5.03
 -15 -13 -3 0.21 -5.03
 15 -13 3 -1.00 -0.44
 15 13 3 0.21 5.03
 -15 13 -3 -1.00 0.44
 -17 -13 -3 1.08 0.75
 17 -13 3 -1.53 -1.83
 -17 -13 -3 1.08 0.75
 -17 13 -3 -1.53 1.83
 17 13 3 1.08 -0.75
 20 -14 -3 -2.31 3.41
 -20 -14 3 1.72 -2.14
 20 14 -3 1.72 2.14
 -18 -14 3 -1.78 6.90
 18 -14 -3 1.61 5.97
 18 14 -3 -1.78 -6.90
 16 -14 -3 0.42 1.61
 -16 -14 3 -0.30 0.55
 16 14 -3 -0.30 -0.55
 -16 14 3 0.42 -1.61
 14 -14 -3 -4.13 -3.29
 -14 -14 3 5.29 2.13
 14 14 -3 5.29 -2.13
 -14 14 3 -4.13 3.29
 -12 -14 3 5.49 -4.55
 12 -14 -3 -5.21 -4.79
 12 14 -3 5.49 4.55
 -12 14 3 -5.21 4.79
 -10 -14 3 -0.25 -2.97
 10 -14 -3 -0.06 0.01
 -10 14 3 -0.06 -0.01
 10 14 -3 -0.25 2.97
 -8 -14 3 -1.93 -1.21
 8 -14 -3 0.78 -1.52
 -8 14 3 0.78 1.52
 8 14 -3 -1.93 1.21
 -6 -14 3 -2.65 0.85
 6 -14 -3 1.57 1.47
 -6 14 3 1.57 -1.47
 6 14 -3 -2.65 -0.85
 -4 -14 3 -0.10 -0.75
 4 -14 -3 -0.05 0.91
 4 14 -3 -0.10 0.75
 -4 14 3 -0.05 -0.91
 2 -14 -3 2.39 2.99
 -2 -14 3 -2.21 5.12
 2 14 -3 -2.21 -5.12
 -2 14 3 2.39 -2.99
 0 -14 -3 0.66 1.35
 0 -14 3 -1.38 1.30
 0 14 3 0.66 -1.35
 0 14 -3 -1.38 -1.30
 2 -14 3 -1.16 1.20
 -2 -14 -3 1.51 0.33
 -2 14 -3 -1.16 -1.20
 2 14 3 1.51 -0.33
 -4 -14 -3 -0.47 3.81
 4 -14 3 1.48 1.73
 -4 14 -3 1.48 -1.73
 4 14 3 -0.47 -3.81
 6 -14 3 1.93 1.69
 -6 -14 -3 -1.70 4.19
 -6 14 -3 1.93 -1.69
 6 14 3 -1.70 -4.19
 8 -14 3 -2.50 -5.25
 -8 -14 -3 0.43 2.92
 8 14 3 0.43 -2.92
 -8 14 -3 -2.50 5.25
 -10 -14 -3 -0.22 2.42
 10 -14 3 -1.11 0.81
 -10 14 -3 -1.11 -0.81
 10 14 3 -0.22 -2.42
 12 -14 3 0.33 0.15
 -12 -14 -3 0.10 1.81
 -12 14 -3 0.33 -0.15
 12 14 3 0.10 -1.81
 14 -14 3 1.09 -0.01
 -14 -14 -3 0.27 3.67
 -14 14 -3 1.09 0.01
 14 14 3 0.27 -3.67
 -16 -14 -3 -0.46 -1.81
 16 -14 3 1.42 0.62
 -16 14 -3 1.42 -0.62
 16 14 3 -0.46 1.81
 -17 -15 3 1.33 -3.17
 17 -15 -3 -1.06 -2.65
 17 15 -3 1.33 3.17
 -15 -15 3 -2.18 -4.20
 15 -15 -3 1.84 -0.02
 15 15 -3 -2.18 4.20
 -13 -15 3 -4.26 -0.90
 13 -15 -3 3.07 6.61
 13 15 -3 -4.26 0.90
 -13 15 3 3.07 -6.61
 -11 -15 3 -2.24 5.46
 11 -15 -3 1.43 4.48
 -11 15 3 1.43 -4.48
 11 15 -3 -2.24 -5.46
 -9 -15 3 1.85 0.20
 9 -15 -3 -2.15 2.40
 9 15 -3 1.85 -0.20
 -9 15 3 -2.15 -2.40
 7 -15 -3 -4.27 -2.47
 -7 -15 3 3.83 -3.92
 -7 15 3 -4.27 2.47
 7 15 -3 3.83 3.92
 -5 -15 3 -0.36 0.32
 5 -15 -3 -0.29 -0.59
 5 15 -3 -0.36 -0.32
 -5 15 3 -0.29 0.59
 3 -15 -3 0.61 -5.45
 -3 -15 3 -1.43 -2.61
 -3 15 3 0.61 5.45
 3 15 -3 -1.43 2.61
 -1 -15 3 0.76 -0.31
 1 -15 -3 -0.63 -3.62
 -1 15 3 -0.63 3.62
 1 15 -3 0.76 0.31
 -1 -15 -3 1.67 0.05
 1 -15 3 -1.01 1.34
 -1 15 -3 -1.01 -1.34
 1 15 3 1.67 -0.05
 -3 -15 -3 1.33 -1.78
 3 -15 3 -1.33 -1.00
 -3 15 -3 -1.33 1.00
 3 15 3 1.33 1.78
 5 -15 3 -1.46 -6.90
 -5 -15 -3 1.83 -6.99
 5 15 3 1.83 6.99
 -5 15 -3 -1.46 6.90
 -7 -15 -3 1.02 -1.59
 7 -15 3 -0.57 -1.54
 7 15 3 1.02 1.59
 -7 15 -3 -0.57 1.54
 -9 -15 -3 -0.15 -3.96
 9 -15 3 2.10 -2.30
 9 15 3 -0.15 3.96
 -9 15 -3 2.10 2.30
 -11 -15 -3 -0.45 -2.62
 11 -15 3 1.79 -1.74
 11 15 3 -0.45 2.62
 -11 15 -3 1.79 1.74
 -13 -15 -3 -3.94 -0.92
 13 -15 3 3.04 -1.45
 -13 15 -3 3.04 1.45
 13 15 3 -3.94 0.92
 14 -16 -3 -3.23 -2.34
 -14 -16 3 2.96 1.40
 14 16 -3 2.96 -1.40
 -12 -16 3 1.55 -3.09
 12 -16 -3 -1.51 -3.32
 12 16 -3 1.55 3.09
 -12 16 3 -1.51 3.32
 -10 -16 3 0.22 -4.36
 10 -16 -3 -1.33 -3.36
 10 16 -3 0.22 4.36
 -10 16 3 -1.33 3.36
 -8 -16 3 -2.71 2.44
 8 -16 -3 1.82 2.56
 -8 16 3 1.82 -2.56
 8 16 -3 -2.71 -2.44
 6 -16 -3 -0.69 2.73
 -6 -16 3 -0.08 2.48
 -6 16 3 -0.69 -2.73
 6 16 -3 -0.08 -2.48
 4 -16 -3 -0.73 1.32
 -4 -16 3 1.00 3.10
 -4 16 3 -0.73 -1.32
 4 16 -3 1.00 -3.10
 2 -16 -3 0.11 4.70
 -2 -16 3 -0.88 4.68
 2 16 -3 -0.88 -4.68
 -2 16 3 0.11 -4.70
 0 -16 3 0.86 0.38
 0 -16 -3 -0.18 -0.22
 0 16 -3 0.86 -0.38
 0 16 3 -0.18 0.22
 2 -16 3 2.28 0.78
 -2 -16 -3 -1.84 -0.21
 2 16 3 -1.84 0.21
 -2 16 -3 2.28 -0.78
 4 -16 3 0.01 2.10
 -4 -16 -3 0.34 3.68
 -4 16 -3 0.01 -2.10
 4 16 3 0.34 -3.68
 6 -16 3 0.94 1.71
 -6 -16 -3 -0.41 3.33
 6 16 3 -0.41 -3.33
 -6 16 -3 0.94 -1.71
 -8 -16 -3 0.80 2.66
 8 -16 3 0.05 2.17
 8 16 3 0.80 -2.66
 -8 16 -3 0.05 -2.17
 10 -16 3 -0.29 -0.84
 -10 -16 -3 -1.09 4.79
 10 16 3 -1.09 -4.79
 -10 16 -3 -0.29 0.84
 -9 -17 3 -0.13 -1.14
 9 -17 -3 0.29 -1.56
 -7 -17 3 -0.40 -3.60
 7 -17 -3 1.27 -3.74
 7 17 -3 -0.40 3.60
 -7 17 3 1.27 3.74
 -5 -17 3 -2.57 -5.08
 5 -17 -3 3.00 -3.26
 5 17 -3 -2.57 5.08
 -5 17 3 3.00 3.26
 -3 -17 3 0.40 -4.85
 3 -17 -3 0.40 0.99
 3 17 -3 0.40 4.85
 -3 17 3 0.40 -0.99
 -1 -17 3 -3.33 -2.23
 1 -17 -3 3.27 -0.13
 -1 17 3 3.27 0.13
 -1 -17 -3 1.73 2.95
 1 -17 3 -2.74 -1.81
 1 17 3 1.73 -2.95
 -1 17 -3 -2.74 1.81
 3 -17 3 -0.97 -0.33
 -3 -17 -3 0.49 0.06
 -3 17 -3 -0.97 0.33
 3 17 3 0.49 -0.06
 5 -17 3 -1.07 0.14
 -5 -17 -3 0.26 -1.82
 5 17 3 0.26 1.82
 32 0 -4 2.63 -0.43
 30 0 -4 2.52 0.05
 28 0 -4 5.49 -1.41
 26 0 -4 2.77 0.09
 24 0 -4 1.61 0.81
 22 0 -4 2.68 -4.27
 22 0 -4 2.68 -4.27
 20 0 -4 11.12 1.98
 20 0 -4 11.12 1.98
 16 0 -4 -17.78 -0.89
 16 0 -4 -17.78 -0.89
 14 0 -4 -8.60 -0.25
 14 0 -4 -8.60 -0.25
 12 0 -4 17.29 3.88
 12 0 -4 17.29 3.88
 8 0 -4 2.61 -4.34
 8 0 -4 2.61 -4.34
 6 0 -4 -26.80 -1.66
 6 0 -4 -26.80 -1.66
 4 0 -4 30.21 -17.37
 4 0 -4 30.21 -17.37
 4 0 -4 30.21 -17.37
 -2 0 4 -157.93 6.82
 2 0 -4 -157.93 -6.82
 2 0 -4 -157.93 -6.82
 0 0 -4 60.80 18.77
 2 0 4 51.17 -9.25
 6 0 4 8.63 0.55
 8 0 4 13.32 2.43
 10 0 4 7.02 -3.39
 12 0 4 -0.58 -1.31
 31 -1 -4 -1.95 0.51
 31 1 -4 -2.34 0.79
 29 -1 -4 -0.99 0.03
 29 1 -4 -1.45 0.58
 27 -1 -4 -0.50 -0.03
 27 1 -4 -1.25 0.85
 27 1 -4 -1.25 0.85
 25 -1 -4 -0.08 -3.07
 25 1 -4 -0.97 2.24
 25 1 -4 -0.97 2.24
 23 -1 -4 0.76 -1.99
 23 1 -4 0.34 4.71
 23 1 -4 0.34 4.71
 21 -1 -4 -3.73 1.71
 21 1 -4 -3.49 1.84
 21 1 -4 -3.49 1.84
 19 -1 -4 -3.87 -3.59
 19 1 -4 -4.37 1.46
 17 -1 -4 14.90 0.82
 17 -1 -4 14.90 0.82
 17 1 -4 15.31 -2.86
 17 1 -4 15.31 -2.86
 15 -1 -4 16.58 -3.26
 15 -1 -4 16.58 -3.26
 15 1 -4 15.82 -0.28
 15 1 -4 15.82 -0.28
 13 -1 -4 0.30 -2.78
 13 -1 -4 0.30 -2.78
 13 -1 -4 0.30 -2.78
 13 1 -4 0.31 -1.52
 13 1 -4 0.31 -1.52
 11 -1 -4 -21.69 -11.31
 11 -1 -4 -21.69 -11.31
 11 -1 -4 -21.69 -11.31
 11 1 -4 -22.12 -7.88
 11 1 -4 -22.12 -7.88
 9 -1 -4 -4.08 -2.20
 9 -1 -4 -4.08 -2.20
 9 1 -4 -3.46 3.22
 9 1 -4 -3.46 3.22
 7 -1 -4 25.82 -0.73
 7 1 -4 26.41 3.51
 7 1 -4 26.41 3.51
 5 -1 -4 30.57 5.62
 5 -1 -4 30.57 5.62
 5 1 -4 29.41 10.96
 5 1 -4 29.41 10.96
 3 -1 -4 114.66 5.18
 3 1 -4 116.11 3.33
 -3 1 4 114.66 -5.18
 3 1 -4 116.11 3.33
 -1 -1 4 104.04 -7.92
 1 -1 -4 103.51 10.75
 -1 1 4 103.51 -10.75
 1 1 -4 104.04 7.92
 -1 1 4 103.51 -10.75
 1 -1 4 -23.38 5.63
 -1 -1 -4 -24.60 -2.80
 -1 -1 -4 -24.60 -2.80
 1 1 4 -24.60 2.80
 1 1 4 -24.60 2.80
 -1 1 -4 -23.38 -5.63
 -1 1 -4 -23.38 -5.63
 -3 -1 -4 -20.71 8.29
 3 -1 4 -20.94 -8.14
 -3 1 -4 -20.94 8.14
 5 -1 4 -1.51 -3.16
 -5 -1 -4 -1.70 -1.36
 7 -1 4 2.49 -2.30
 -7 -1 -4 3.66 5.57
 7 1 4 3.66 -5.57
 9 1 4 2.71 0.23
 11 1 4 3.73 -0.90
 13 1 4 5.28 -0.68
 15 1 4 -2.65 1.71
 17 1 4 -3.13 -1.29
 -19 -1 -4 -3.27 1.44
 19 1 4 -3.27 -1.44
 -32 -2 4 1.37 -0.47
 32 -2 -4 2.13 -1.01
 32 2 -4 1.37 0.47
 30 -2 -4 1.41 2.64
 30 2 -4 0.94 -2.31
 30 2 -4 0.94 -2.31
 28 -2 -4 -2.53 5.04
 28 2 -4 -2.22 0.30
 28 2 -4 -2.22 0.30
 26 -2 -4 0.98 5.02
 26 2 -4 1.42 -2.66
 26 2 -4 1.42 -2.66
 24 -2 -4 1.08 10.04
 24 2 -4 0.67 -8.12
 24 2 -4 0.67 -8.12
 22 -2 -4 0.86 3.00
 22 2 -4 0.37 -0.57
 22 2 -4 0.37 -0.57
 20 -2 -4 1.91 -3.74
 20 -2 -4 1.91 -3.74
 20 2 -4 1.72 -1.58
 20 2 -4 1.72 -1.58
 18 -2 -4 -0.38 -4.73
 18 -2 -4 -0.38 -4.73
 18 2 -4 -0.54 3.99
 18 2 -4 -0.54 3.99
 16 -2 -4 3.03 -2.64
 16 -2 -4 3.03 -2.64
 16 2 -4 2.29 1.29
 16 2 -4 2.29 1.29
 14 -2 -4 11.12 -3.24
 14 -2 -4 11.12 -3.24
 14 2 -4 10.73 1.36
 14 2 -4 10.73 1.36
 12 -2 -4 25.53 3.15
 12 -2 -4 25.53 3.15
 12 2 -4 26.17 3.20
 12 2 -4 26.17 3.20
 10 -2 -4 16.84 0.41
 10 -2 -4 16.84 0.41
 10 2 -4 15.43 0.68
 10 2 -4 15.43 0.68
 8 -2 -4 11.57 -10.33
 8 2 -4 12.09 -14.69
 8 2 -4 12.09 -14.69
 6 -2 -4 52.37 -5.99
 -6 2 4 52.37 5.99
 6 2 -4 54.78 -21.73
 6 2 -4 54.78 -21.73
 4 -2 -4 -41.48 17.27
 4 -2 -4 -41.48 17.27
 -4 -2 4 -41.19 -10.08
 4 2 -4 -41.19 10.08
 -4 2 4 -41.48 -17.27
 4 2 -4 -41.19 10.08
 -2 -2 4 -4.78 1.14
 -2 -2 4 -4.78 1.14
 2 -2 -4 -5.41 13.94
 2 -2 -4 -5.41 13.94
 2 2 -4 -4.78 -1.14
 -2 2 4 -5.41 -13.94
 2 2 -4 -4.78 -1.14
 0 -2 4 -56.60 5.37
 0 -2 -4 -55.44 -5.47
 0 -2 -4 -55.44 -5.47
 0 -2 4 -56.60 5.37
 0 2 4 -55.44 5.47
 0 2 -4 -56.60 -5.37
 0 2 -4 -56.60 -5.37
 2 -2 4 21.98 1.37
 -2 -2 -4 22.43 -0.36
 -2 -2 -4 22.43 -0.36
 2 2 4 22.43 0.36
 -2 2 -4 21.98 -1.37
 -2 2 -4 21.98 -1.37
 6 -2 4 -8.27 2.59
 -6 -2 -4 -9.39 -4.37
 6 2 4 -9.39 4.37
 8 -2 4 -5.75 -0.22
 -8 -2 -4 -6.84 -4.25
 8 2 4 -6.84 4.25
 10 -2 4 -6.21 -3.43
 -10 -2 -4 -6.31 -3.62
 10 2 4 -6.31 3.62
 -12 -2 -4 -5.73 0.08
 12 -2 4 -6.15 -0.69
 12 2 4 -5.73 -0.08
 -14 -2 -4 -4.39 1.49
 14 2 4 -4.39 -1.49
 -16 -2 -4 -2.47 1.10
 16 2 4 -2.47 -1.10
 -18 -2 -4 2.27 -2.09
 18 2 4 2.27 2.09
 20 2 4 -0.46 -1.40
 22 2 4 -2.60 0.36
 31 -3 -4 1.64 1.72
 -31 -3 4 1.88 0.20
 31 3 -4 1.88 -0.20
 31 3 -4 1.88 -0.20
 -29 -3 4 3.35 -0.43
 29 -3 -4 3.00 -2.15
 29 3 -4 3.35 0.43
 29 3 -4 3.35 0.43
 -27 -3 4 1.88 4.19
 27 -3 -4 1.84 -0.50
 27 3 -4 1.88 -4.19
 27 3 -4 1.88 -4.19
 25 -3 -4 -1.39 -4.51
 25 3 -4 0.31 4.50
 25 3 -4 0.31 4.50
 23 -3 -4 0.43 -4.60
 23 -3 -4 0.43 -4.60
 23 3 -4 0.58 2.50
 23 3 -4 0.58 2.50
 21 -3 -4 4.27 0.99
 21 -3 -4 4.27 0.99
 21 3 -4 3.81 -0.39
 21 3 -4 3.81 -0.39
 19 -3 -4 -0.38 13.59
 19 -3 -4 -0.38 13.59
 19 3 -4 -1.68 -5.68
 19 3 -4 -1.68 -5.68
 17 -3 -4 -16.87 1.87
 17 -3 -4 -16.87 1.87
 17 3 -4 -17.06 3.91
 17 3 -4 -17.06 3.91
 15 -3 -4 -23.54 3.02
 15 -3 -4 -23.54 3.02
 15 3 -4 -23.30 3.85
 15 3 -4 -23.30 3.85
 13 -3 -4 -16.50 -1.08
 13 -3 -4 -16.50 -1.08
 13 3 -4 -16.89 2.18
 13 3 -4 -16.89 2.18
 11 -3 -4 10.85 -1.33
 11 -3 -4 10.85 -1.33
 11 3 -4 11.85 -3.40
 11 3 -4 11.85 -3.40
 9 -3 -4 25.08 3.47
 7 -3 -4 -36.31 31.47
 7 3 -4 -38.51 35.82
 -7 3 4 -36.31 -31.47
 7 3 -4 -38.51 35.82
 -5 -3 4 -57.22 2.71
 5 -3 -4 -57.14 -4.37
 5 -3 -4 -57.14 -4.37
 -5 3 4 -57.14 4.37
 5 3 -4 -57.22 -2.71
 5 3 -4 -57.22 -2.71
 3 -3 -4 -55.10 -10.40
 3 -3 -4 -55.10 -10.40
 -3 -3 4 -55.32 8.25
 -3 -3 4 -55.32 8.25
 -3 3 4 -55.10 10.40
 3 3 -4 -55.32 -8.25
 3 3 -4 -55.32 -8.25
 -1 -3 4 -29.42 6.11
 -1 -3 4 -29.42 6.11
 1 -3 -4 -29.64 -8.64
 1 -3 -4 -29.64 -8.64
 1 3 -4 -29.42 -6.11
 1 3 -4 -29.42 -6.11
 -1 3 4 -29.64 8.64
 -1 -3 -4 26.18 11.18
 -1 -3 -4 26.18 11.18
 1 -3 4 27.41 -9.73
 -1 3 -4 27.41 9.73
 1 3 4 26.18 -11.18
 -1 3 -4 27.41 9.73
 -3 -3 -4 12.61 -2.87
 3 -3 4 13.59 2.76
 -3 -3 -4 12.61 -2.87
 3 3 4 12.61 2.87
 -5 -3 -4 20.35 6.97
 -5 -3 -4 20.35 6.97
 5 -3 4 18.88 -4.64
 -7 -3 -4 5.70 8.18
 7 -3 4 4.57 -9.83
 7 3 4 5.70 -8.18
 -9 -3 -4 -0.86 4.48
 9 -3 4 -2.16 -3.29
 9 -3 4 -2.16 -3.29
 9 3 4 -0.86 -4.48
 -11 -3 -4 0.27 -3.43
 11 -3 4 0.84 2.13
 11 -3 4 0.84 2.13
 11 3 4 0.27 3.43
 -13 -3 -4 2.45 -5.09
 13 -3 4 3.13 0.48
 13 -3 4 3.13 0.48
 13 3 4 2.45 5.09
 15 -3 4 8.75 7.62
 -15 -3 -4 7.45 -0.46
 15 3 4 7.45 0.46
 -17 -3 -4 6.32 1.02
 17 3 4 6.32 -1.02
 -19 -3 -4 2.64 0.62
 19 3 4 2.64 -0.62
 21 3 4 1.43 1.73
 23 3 4 -1.11 -2.18
 25 3 4 -2.96 -0.19
 30 -4 -4 -6.16 -1.24
 -30 -4 4 -6.37 1.01
 30 4 -4 -6.37 -1.01
 30 4 -4 -6.37 -1.01
 -28 -4 4 -5.18 -1.24
 28 -4 -4 -5.01 2.08
 28 4 -4 -5.18 1.24
 28 4 -4 -5.18 1.24
 26 -4 -4 -0.58 -1.17
 -26 -4 4 -3.17 -4.44
 26 -4 -4 -0.58 -1.17
 26 4 -4 -3.17 4.44
 26 4 -4 -3.17 4.44
 24 -4 -4 0.65 -0.60
 -24 -4 4 0.69 4.09
 24 -4 -4 0.65 -0.60
 24 4 -4 0.69 -4.09
 24 4 -4 0.69 -4.09
 22 -4 -4 -3.07 -0.30
 -22 -4 4 -3.17 -0.88
 22 -4 -4 -3.07 -0.30
 22 4 -4 -3.17 0.88
 22 4 -4 -3.17 0.88
 20 -4 -4 -5.97 -13.70
 20 -4 -4 -5.97 -13.70
 -20 -4 4 -5.31 -9.16
 20 4 -4 -5.31 9.16
 20 4 -4 -5.31 9.16
 18 -4 -4 6.24 -9.67
 18 -4 -4 6.24 -9.67
 -18 -4 4 4.71 -2.61
 18 4 -4 4.71 2.61
 18 4 -4 4.71 2.61
 16 -4 -4 14.28 3.33
 -16 -4 4 13.59 6.32
 16 -4 -4 14.28 3.33
 16 4 -4 13.59 -6.32
 16 4 -4 13.59 -6.32
 14 -4 -4 9.84 2.23
 14 -4 -4 9.84 2.23
 -14 -4 4 9.13 5.08
 14 4 -4 9.13 -5.08
 14 4 -4 9.13 -5.08
 -12 -4 4 -23.49 2.96
 12 -4 -4 -23.86 -2.10
 12 -4 -4 -23.86 -2.10
 -12 4 4 -23.86 2.10
 12 4 -4 -23.49 -2.96
 12 4 -4 -23.49 -2.96
 10 -4 -4 -52.21 5.88
 10 -4 -4 -52.21 5.88
 -10 -4 4 -52.79 -9.00
 -10 4 4 -52.21 -5.88
 10 4 -4 -52.79 9.00
 10 4 -4 -52.79 9.00
 8 -4 -4 -31.55 -10.69
 -8 -4 4 -31.53 9.99
 -8 4 4 -31.55 10.69
 8 4 -4 -31.53 -9.99
 4 -4 -4 23.87 8.77
 -4 -4 4 24.44 -3.14
 -4 -4 4 24.44 -3.14
 4 -4 -4 23.87 8.77
 4 4 -4 24.44 3.14
 -4 4 4 23.87 -8.77
 4 4 -4 24.44 3.14
 -2 -4 4 -10.06 0.35
 2 -4 -4 -11.04 -0.96
 2 -4 -4 -11.04 -0.96
 -2 4 4 -11.04 0.96
 0 -4 -4 -3.85 -7.35
 0 -4 -4 -3.85 -7.35
 0 -4 4 -4.49 12.77
 0 4 4 -3.85 7.35
 -2 -4 -4 -31.38 -6.71
 2 -4 4 -32.92 8.09
 -2 -4 -4 -31.38 -6.71
 -2 4 -4 -32.92 -8.09
 -2 4 -4 -32.92 -8.09
 2 4 4 -31.38 6.71
 -2 4 -4 -32.92 -8.09
 -4 -4 -4 -5.01 14.12
 4 -4 4 -5.37 -11.28
 -4 -4 -4 -5.01 14.12
 -4 4 -4 -5.37 11.28
 4 4 4 -5.01 -14.12
 -6 -4 -4 -2.76 2.74
 -6 -4 -4 -2.76 2.74
 6 -4 4 -1.08 -0.77
 6 4 4 -2.76 -2.74
 8 -4 4 -0.39 -0.10
 -10 -4 -4 2.68 1.49
 10 -4 4 3.02 -4.75
 10 -4 4 3.02 -4.75
 12 -4 4 0.83 -3.90
 -12 -4 -4 0.96 2.10
 12 -4 4 0.83 -3.90
 12 4 4 0.96 -2.10
 -14 -4 -4 1.64 -1.84
 14 -4 4 0.59 -5.13
 14 -4 4 0.59 -5.13
 14 4 4 1.64 1.84
 16 -4 4 -8.73 -9.42
 -16 -4 -4 -8.10 -4.10
 16 4 4 -8.10 4.10
 18 -4 4 -11.37 1.24
 -18 -4 -4 -11.19 -5.11
 18 4 4 -11.19 5.11
 20 4 4 -4.19 -0.34
 22 4 4 1.23 2.18
 24 4 4 3.86 2.25
 26 4 4 0.43 -0.46
 31 -5 -4 1.06 -0.83
 -31 -5 4 0.97 -1.88
 31 5 -4 0.97 1.88
 -29 -5 4 2.95 -2.22
 29 -5 -4 2.53 -2.92
 29 5 -4 2.95 2.22
 29 5 -4 2.95 2.22
 27 -5 -4 -2.85 -2.48
 -27 -5 4 -0.43 3.49
 27 -5 -4 -2.85 -2.48
 27 5 -4 -0.43 -3.49
 27 5 -4 -0.43 -3.49
 25 -5 -4 -6.79 2.39
 25 -5 -4 -6.79 2.39
 -25 -5 4 -5.73 -0.32
 25 5 -4 -5.73 0.32
 25 5 -4 -5.73 0.32
 23 -5 -4 -6.34 -1.26
 -23 -5 4 -6.40 -3.39
 23 -5 -4 -6.34 -1.26
 23 5 -4 -6.40 3.39
 23 5 -4 -6.40 3.39
 21 -5 -4 0.36 4.79
 21 -5 -4 0.36 4.79
 -21 -5 4 0.12 7.74
 21 5 -4 0.12 -7.74
 21 5 -4 0.12 -7.74
 -19 -5 4 1.32 5.04
 19 -5 -4 0.08 8.22
 19 -5 -4 0.08 8.22
 19 5 -4 1.32 -5.04
 19 5 -4 1.32 -5.04
 17 -5 -4 -3.94 -1.64
 -17 -5 4 -3.13 -3.75
 17 -5 -4 -3.94 -1.64
 17 5 -4 -3.13 3.75
 17 5 -4 -3.13 3.75
 -17 5 4 -3.94 1.64
 -15 -5 4 -6.27 -3.74
 15 -5 -4 -7.15 -5.04
 15 -5 -4 -7.15 -5.04
 15 5 -4 -6.27 3.74
 -15 5 4 -7.15 5.04
 15 5 -4 -6.27 3.74
 13 -5 -4 0.02 1.59
 13 -5 -4 0.02 1.59
 -13 -5 4 -1.17 -10.70
 -13 5 4 0.02 -1.59
 13 5 -4 -1.17 10.70
 13 5 -4 -1.17 10.70
 11 -5 -4 10.80 2.84
 11 -5 -4 10.80 2.84
 -11 -5 4 10.52 -1.51
 11 5 -4 10.52 1.51
 11 5 -4 10.52 1.51
 -11 5 4 10.80 -2.84
 9 -5 -4 5.59 0.95
 9 -5 -4 5.59 0.95
 9 5 -4 6.33 5.68
 9 5 -4 6.33 5.68
 -9 5 4 5.59 -0.95
 -7 -5 4 4.59 -0.06
 -7 5 4 4.13 -1.61
 7 5 -4 4.59 0.06
 7 5 -4 4.59 0.06
 5 -5 -4 -4.17 -1.70
 -5 -5 4 -3.79 -0.83
 5 -5 -4 -4.17 -1.70
 5 5 -4 -3.79 0.83
 5 5 -4 -3.79 0.83
 -5 5 4 -4.17 1.70
 3 -5 -4 10.82 -9.39
 3 -5 -4 10.82 -9.39
 -3 -5 4 10.51 9.19
 -3 -5 4 10.51 9.19
 -3 5 4 10.82 9.39
 3 5 -4 10.51 -9.19
 1 -5 -4 11.13 -3.32
 1 -5 -4 11.13 -3.32
 1 5 -4 11.59 -1.82
 -1 5 4 11.13 3.32
 -3 -5 -4 -9.78 -22.45
 -3 -5 -4 -9.78 -22.45
 -3 5 -4 -9.00 -19.58
 -3 5 -4 -9.00 -19.58
 3 5 4 -9.78 22.45
 -5 -5 -4 -21.57 -21.34
 -5 -5 -4 -21.57 -21.34
 5 5 4 -21.57 21.34
 -5 5 -4 -22.19 -16.32
 -7 -5 -4 -5.47 -5.72
 -7 -5 -4 -5.47 -5.72
 7 -5 4 -6.66 4.44
 7 5 4 -5.47 5.72
 -7 5 -4 -6.66 -4.44
 9 -5 4 2.00 3.33
 9 -5 4 2.00 3.33
 -9 -5 -4 1.25 -3.18
 -9 -5 -4 1.25 -3.18
 9 5 4 1.25 3.18
 -11 -5 -4 0.98 -0.09
 11 -5 4 1.58 5.59
 11 -5 4 1.58 5.59
 11 5 4 0.98 0.09
 -13 -5 -4 -8.42 0.34
 13 -5 4 -8.39 0.61
 13 -5 4 -8.39 0.61
 13 5 4 -8.42 -0.34
 15 -5 4 -5.42 8.55
 15 -5 4 -5.42 8.55
 -15 -5 -4 -5.78 -4.39
 15 5 4 -5.78 4.39
 -17 -5 -4 4.20 2.66
 17 -5 4 3.76 6.46
 17 5 4 4.20 -2.66
 -19 -5 -4 5.56 -1.18
 19 5 4 5.56 1.18
 21 5 4 0.20 1.20
 23 5 4 -1.36 -1.09
 25 5 4 -0.54 0.38
 -30 -6 4 0.57 0.82
 30 -6 -4 -0.12 0.80
 30 6 -4 0.57 -0.82
 -28 -6 4 1.75 -2.79
 28 -6 -4 3.42 -2.10
 28 -6 -4 3.42 -2.10
 28 6 -4 1.75 2.79
 -26 -6 4 3.33 -2.04
 26 -6 -4 3.74 -2.94
 26 -6 -4 3.74 -2.94
 26 6 -4 3.33 2.04
 26 6 -4 3.33 2.04
 24 -6 -4 4.54 -1.48
 -24 -6 4 3.96 1.71
 24 -6 -4 4.54 -1.48
 24 6 -4 3.96 -1.71
 24 6 -4 3.96 -1.71
 -22 -6 4 -0.97 -2.65
 22 -6 -4 -1.15 -0.95
 22 -6 -4 -1.15 -0.95
 22 6 -4 -0.97 2.65
 22 6 -4 -0.97 2.65
 -22 6 4 -1.15 0.95
 20 -6 -4 -3.78 -0.21
 -20 -6 4 -4.46 -8.16
 20 -6 -4 -3.78 -0.21
 20 6 -4 -4.46 8.16
 -20 6 4 -3.78 0.21
 20 6 -4 -4.46 8.16
 18 -6 -4 -6.32 -3.01
 -18 -6 4 -6.62 -0.56
 18 -6 -4 -6.32 -3.01
 18 6 -4 -6.62 0.56
 18 6 -4 -6.62 0.56
 -18 6 4 -6.32 3.01
 16 -6 -4 -5.24 0.17
 -16 -6 4 -5.88 -7.19
 16 -6 -4 -5.24 0.17
 -16 6 4 -5.24 -0.17
 16 6 -4 -5.88 7.19
 16 6 -4 -5.88 7.19
 -14 -6 4 -5.51 1.78
 14 -6 -4 -6.11 -1.87
 14 -6 -4 -6.11 -1.87
 14 6 -4 -5.51 -1.78
 -14 6 4 -6.11 1.87
 14 6 -4 -5.51 -1.78
 12 -6 -4 -3.87 -1.43
 -12 -6 4 -3.18 -1.70
 12 -6 -4 -3.87 -1.43
 -12 6 4 -3.87 1.43
 12 6 -4 -3.18 1.70
 12 6 -4 -3.18 1.70
 10 -6 -4 3.32 -1.54
 10 -6 -4 3.32 -1.54
 -10 -6 4 3.15 4.75
 10 6 -4 3.15 -4.75
 -10 6 4 3.32 1.54
 10 6 -4 3.15 -4.75
 8 -6 -4 -8.63 1.74
 -8 -6 4 -7.95 1.56
 8 6 -4 -7.95 -1.56
 8 6 -4 -7.95 -1.56
 -8 6 4 -8.63 -1.74
 -6 -6 4 -2.41 4.81
 6 6 -4 -2.41 -4.81
 6 6 -4 -2.41 -4.81
 -6 6 4 -1.71 -0.98
 4 -6 -4 -16.59 -0.38
 -4 -6 4 -17.22 -4.62
 -4 6 4 -16.59 0.38
 4 6 -4 -17.22 4.62
 -2 -6 4 -12.90 -2.76
 2 -6 -4 -12.26 5.24
 2 6 -4 -12.90 2.76
 -2 6 4 -12.26 -5.24
 0 -6 4 -12.56 -7.96
 0 -6 -4 -12.38 0.52
 0 -6 -4 -12.38 0.52
 0 6 -4 -12.56 7.96
 0 6 4 -12.38 -0.52
 2 -6 4 2.59 -13.65
 -2 -6 -4 2.61 13.26
 -2 -6 -4 2.61 13.26
 2 6 4 2.61 -13.26
 -2 6 -4 2.59 13.65
 4 -6 4 0.57 -5.70
 -4 -6 -4 0.22 3.98
 -4 -6 -4 0.22 3.98
 4 6 4 0.22 -3.98
 -4 6 -4 0.57 5.70
 -6 -6 -4 6.15 -0.24
 6 -6 4 6.36 1.12
 -6 -6 -4 6.15 -0.24
 6 6 4 6.15 0.24
 -6 6 -4 6.36 -1.12
 -8 -6 -4 -4.74 -11.35
 8 -6 4 -5.44 6.17
 8 -6 4 -5.44 6.17
 -8 -6 -4 -4.74 -11.35
 -8 6 -4 -5.44 -6.17
 8 6 4 -4.74 11.35
 10 -6 4 -10.97 -7.42
 -10 -6 -4 -9.52 2.97
 10 -6 4 -10.97 -7.42
 -10 -6 -4 -9.52 2.97
 10 6 4 -9.52 -2.97
 -10 6 -4 -10.97 7.42
 -12 -6 -4 -2.43 -2.99
 12 -6 4 -2.59 1.67
 -12 -6 -4 -2.43 -2.99
 12 -6 4 -2.59 1.67
 -12 6 -4 -2.59 -1.67
 -14 -6 -4 3.49 9.70
 14 -6 4 3.41 -5.81
 14 -6 4 3.41 -5.81
 14 6 4 3.49 -9.70
 16 -6 4 6.41 -3.93
 -16 -6 -4 6.30 3.13
 16 -6 4 6.41 -3.93
 16 6 4 6.30 -3.13
 -18 -6 -4 2.62 1.04
 18 -6 4 2.73 -2.96
 18 6 4 2.62 -1.04
 20 6 4 -0.55 3.35
 22 6 4 -1.23 2.56
 24 6 4 -4.28 1.70
 29 -7 -4 -1.03 1.22
 -29 -7 4 -0.11 2.85
 29 -7 -4 -1.03 1.22
 29 7 -4 -0.11 -2.85
 27 -7 -4 -0.28 3.63
 -27 -7 4 1.24 2.08
 27 -7 -4 -0.28 3.63
 27 7 -4 1.24 -2.08
 25 -7 -4 -0.08 0.37
 25 -7 -4 -0.08 0.37
 -25 -7 4 0.10 -2.98
 25 7 -4 0.10 2.98
 -23 -7 4 1.91 -2.65
 23 -7 -4 1.52 2.97
 23 -7 -4 1.52 2.97
 23 7 -4 1.91 2.65
 23 7 -4 1.91 2.65
 21 -7 -4 -0.54 0.16
 21 -7 -4 -0.54 0.16
 -21 -7 4 -0.18 -0.13
 21 7 -4 -0.18 0.13
 21 7 -4 -0.18 0.13
 -21 7 4 -0.54 -0.16
 19 -7 -4 -0.85 -1.03
 -19 -7 4 -0.34 0.38
 19 -7 -4 -0.85 -1.03
 19 7 -4 -0.34 -0.38
 -19 7 4 -0.85 1.03
 19 7 -4 -0.34 -0.38
 17 -7 -4 1.53 2.23
 17 -7 -4 1.53 2.23
 -17 -7 4 1.10 1.13
 -17 7 4 1.53 -2.23
 17 7 -4 1.10 -1.13
 17 7 -4 1.10 -1.13
 15 -7 -4 4.27 -0.50
 -15 -7 4 3.64 0.97
 15 -7 -4 4.27 -0.50
 15 7 -4 3.64 -0.97
 -15 7 4 4.27 0.50
 15 7 -4 3.64 -0.97
 13 -7 -4 0.73 1.79
 13 -7 -4 0.73 1.79
 -13 -7 4 0.14 -0.66
 -13 7 4 0.73 -1.79
 13 7 -4 0.14 0.66
 13 7 -4 0.14 0.66
 11 -7 -4 -5.15 -0.08
 -11 -7 4 -5.04 -2.50
 11 -7 -4 -5.15 -0.08
 11 7 -4 -5.04 2.50
 11 7 -4 -5.04 2.50
 -11 7 4 -5.15 0.08
 9 -7 -4 -9.58 -0.39
 9 -7 -4 -9.58 -0.39
 -9 7 4 -9.58 0.39
 9 7 -4 -9.38 -1.93
 7 -7 -4 6.92 -0.33
 -7 -7 4 7.29 -1.80
 7 -7 -4 6.92 -0.33
 -7 7 4 6.92 0.33
 7 7 -4 7.29 1.80
 5 -7 -4 4.10 -4.00
 -5 -7 4 4.71 0.48
 5 7 -4 4.71 -0.48
 -5 7 4 4.10 4.00
 3 -7 -4 11.99 -1.10
 -3 -7 4 12.21 0.66
 3 -7 -4 11.99 -1.10
 -3 7 4 11.99 1.10
 1 -7 -4 6.90 6.22
 1 -7 -4 6.90 6.22
 -1 -7 4 6.54 -0.34
 1 7 -4 6.54 0.34
 -1 7 4 6.90 -6.22
 -1 -7 -4 -2.37 1.12
 1 -7 4 -2.89 7.53
 -1 -7 -4 -2.37 1.12
 -1 7 -4 -2.89 -7.53
 1 7 4 -2.37 -1.12
 3 -7 4 0.45 5.30
 -3 -7 -4 1.17 1.03
 -3 -7 -4 1.17 1.03
 -3 7 -4 0.45 -5.30
 3 7 4 1.17 -1.03
 5 -7 4 -5.09 -0.37
 -5 -7 -4 -4.89 2.43
 -5 -7 -4 -4.89 2.43
 5 7 4 -4.89 -2.43
 -5 7 -4 -5.09 0.37
 -7 -7 -4 3.01 -0.15
 -7 -7 -4 3.01 -0.15
 7 -7 4 3.33 -4.22
 7 7 4 3.01 0.15
 -7 7 -4 3.33 4.22
 -9 -7 -4 2.03 1.01
 -9 -7 -4 2.03 1.01
 9 -7 4 2.50 1.98
 -9 7 -4 2.50 -1.98
 9 7 4 2.03 -1.01
 -11 -7 -4 3.84 -2.20
 -11 -7 -4 3.84 -2.20
 11 -7 4 4.30 0.05
 11 -7 4 4.30 0.05
 -11 7 -4 4.30 -0.05
 11 7 4 3.84 2.20
 13 -7 4 3.46 1.42
 -13 -7 -4 4.43 -5.02
 -13 -7 -4 4.43 -5.02
 13 -7 4 3.46 1.42
 13 7 4 4.43 5.02
 -13 7 -4 3.46 -1.42
 15 -7 4 -3.30 -1.76
 15 -7 4 -3.30 -1.76
 -15 -7 -4 -2.97 -7.05
 -15 -7 -4 -2.97 -7.05
 15 7 4 -2.97 7.05
 -15 7 -4 -3.30 1.76
 17 -7 4 -6.59 -2.23
 -17 -7 -4 -5.96 -5.23
 -17 -7 -4 -5.96 -5.23
 17 7 4 -5.96 5.23
 -17 7 -4 -6.59 2.23
 -19 -7 -4 -1.82 1.12
 -19 -7 -4 -1.82 1.12
 -19 7 -4 -2.91 -3.33
 19 7 4 -1.82 -1.12
 -21 -7 -4 2.13 5.21
 -21 7 -4 0.23 -0.85
 21 7 4 2.13 -5.21
 -23 -7 -4 2.25 0.35
 23 7 4 2.25 -0.35
 -23 7 -4 2.01 -1.47
 25 7 4 6.07 -2.66
 -28 -8 4 0.38 -2.53
 28 -8 -4 0.12 -1.94
 28 -8 -4 0.12 -1.94
 28 8 -4 0.38 2.53
 26 -8 -4 -1.08 -1.65
 26 -8 -4 -1.08 -1.65
 -26 -8 4 -1.20 1.89
 26 8 -4 -1.20 -1.89
 -24 -8 4 2.18 3.50
 24 -8 -4 1.32 -1.07
 24 -8 -4 1.32 -1.07
 24 8 -4 2.18 -3.50
 22 -8 -4 -0.51 -1.40
 22 -8 -4 -0.51 -1.40
 -22 -8 4 -0.92 2.16
 22 8 -4 -0.92 -2.16
 20 -8 -4 4.85 2.36
 20 -8 -4 4.85 2.36
 -20 -8 4 3.93 2.44
 -20 8 4 4.85 -2.36
 20 8 -4 3.93 -2.44
 -18 -8 4 0.63 2.75
 18 -8 -4 1.44 1.77
 18 -8 -4 1.44 1.77
 -18 8 4 1.44 -1.77
 18 8 -4 0.63 -2.75
 -16 -8 4 -0.15 4.57
 16 -8 -4 -0.63 3.10
 16 -8 -4 -0.63 3.10
 16 8 -4 -0.15 -4.57
 -16 8 4 -0.63 -3.10
 14 -8 -4 -0.72 1.18
 -14 -8 4 -0.12 0.60
 14 -8 -4 -0.72 1.18
 14 8 -4 -0.12 -0.60
 -14 8 4 -0.72 -1.18
 -12 -8 4 4.07 4.26
 12 -8 -4 2.64 2.06
 12 -8 -4 2.64 2.06
 12 8 -4 4.07 -4.26
 -12 8 4 2.64 -2.06
 10 -8 -4 12.21 1.93
 -10 8 4 12.21 -1.93
 10 8 -4 12.56 0.12
 8 -8 -4 3.65 -3.88
 8 8 -4 3.82 -1.20
 -8 8 4 3.65 3.88
 6 -8 -4 -3.75 -3.17
 6 -8 -4 -3.75 -3.17
 -6 -8 4 -3.70 1.80
 -6 -8 4 -3.70 1.80
 6 8 -4 -3.70 -1.80
 -6 8 4 -3.75 3.17
 4 -8 -4 -0.05 4.23
 4 -8 -4 -0.05 4.23
 -4 -8 4 0.78 2.60
 -4 -8 4 0.78 2.60
 -4 8 4 -0.05 -4.23
 2 -8 -4 -9.05 -2.18
 -2 -8 4 -8.16 1.20
 2 -8 -4 -9.05 -2.18
 -2 8 4 -9.05 2.18
 2 8 -4 -8.16 -1.20
 0 -8 4 7.28 0.30
 0 -8 -4 7.06 -1.81
 0 -8 -4 7.06 -1.81
 0 8 -4 7.28 -0.30
 0 8 4 7.06 1.81
 2 -8 4 5.44 -0.72
 -2 -8 -4 4.36 -3.13
 2 8 4 4.36 3.13
 -2 8 -4 5.44 0.72
 -4 -8 -4 3.91 2.20
 4 -8 4 4.15 -4.25
 -4 -8 -4 3.91 2.20
 -4 8 -4 4.15 4.25
 4 8 4 3.91 -2.20
 6 -8 4 3.28 1.12
 -6 -8 -4 2.87 -0.87
 -6 -8 -4 2.87 -0.87
 -6 8 -4 3.28 -1.12
 6 8 4 2.87 0.87
 8 -8 4 1.27 3.24
 -8 -8 -4 0.79 0.23
 -8 -8 -4 0.79 0.23
 8 8 4 0.79 -0.23
 -8 8 -4 1.27 -3.24
 -10 -8 -4 4.94 -7.60
 10 -8 4 4.64 4.18
 -10 -8 -4 4.94 -7.60
 -10 8 -4 4.64 -4.18
 10 8 4 4.94 7.60
 12 -8 4 -3.87 -1.87
 -12 -8 -4 -5.05 0.57
 -12 -8 -4 -5.05 0.57
 12 8 4 -5.05 -0.57
 -12 8 -4 -3.87 1.87
 -14 -8 -4 -3.14 -1.22
 -14 -8 -4 -3.14 -1.22
 14 -8 4 -2.29 0.35
 14 8 4 -3.14 1.22
 -14 8 -4 -2.29 -0.35
 -16 -8 -4 -0.84 4.25
 -16 -8 -4 -0.84 4.25
 16 -8 4 -0.13 3.13
 16 8 4 -0.84 -4.25
 -16 8 -4 -0.13 -3.13
 -18 -8 -4 1.40 0.09
 -18 -8 -4 1.40 0.09
 18 8 4 1.40 -0.09
 -18 8 -4 1.84 3.15
 -20 -8 -4 1.03 -1.76
 -20 8 -4 0.79 0.39
 20 8 4 1.03 1.76
 -22 -8 -4 1.61 -2.38
 22 8 4 1.61 2.38
 -22 8 -4 1.91 0.37
 -24 -8 -4 -0.42 0.36
 24 8 4 -0.42 -0.36
 -24 8 -4 0.41 1.32
 -27 -9 4 -0.88 2.93
 27 -9 -4 -0.51 1.90
 27 9 -4 -0.88 -2.93
 25 -9 -4 -0.64 1.20
 -25 -9 4 -1.00 -1.42
 25 9 -4 -1.00 1.42
 23 -9 -4 0.39 -3.67
 -23 -9 4 0.35 -0.37
 23 -9 -4 0.39 -3.67
 23 9 -4 0.35 0.37
 -21 -9 4 -0.68 0.85
 21 -9 -4 -0.94 -5.14
 21 -9 -4 -0.94 -5.14
 21 9 -4 -0.68 -0.85
 -19 -9 4 0.59 -0.40
 19 -9 -4 0.17 -3.24
 19 -9 -4 0.17 -3.24
 19 9 -4 0.59 0.40
 -19 9 4 0.17 3.24
 17 -9 -4 4.10 1.16
 -17 -9 4 5.17 -3.56
 17 -9 -4 4.10 1.16
 -17 9 4 4.10 -1.16
 17 9 -4 5.17 3.56
 -15 -9 4 1.47 1.72
 15 -9 -4 2.09 0.63
 15 -9 -4 2.09 0.63
 15 9 -4 1.47 -1.72
 -15 9 4 2.09 -0.63
 -13 -9 4 4.73 0.77
 13 -9 -4 5.60 0.88
 13 -9 -4 5.60 0.88
 13 9 -4 4.73 -0.77
 -13 9 4 5.60 -0.88
 11 -9 -4 2.22 -7.15
 -11 -9 4 0.61 4.20
 11 -9 -4 2.22 -7.15
 11 9 -4 0.61 -4.20
 -11 9 4 2.22 7.15
 9 -9 -4 4.79 -2.30
 -9 -9 4 4.22 2.74
 9 -9 -4 4.79 -2.30
 -9 9 4 4.79 2.30
 9 9 -4 4.22 -2.74
 -5 -9 4 3.03 1.67
 5 -9 -4 2.82 -0.09
 -5 -9 4 3.03 1.67
 5 -9 -4 2.82 -0.09
 -5 9 4 2.82 0.09
 3 -9 -4 3.48 -1.33
 3 -9 -4 3.48 -1.33
 -3 -9 4 2.44 -1.31
 3 9 -4 2.44 1.31
 -3 9 4 3.48 1.33
 -1 -9 4 0.86 2.21
 1 -9 -4 0.80 -5.16
 1 -9 -4 0.80 -5.16
 1 9 -4 0.86 -2.21
 -1 9 4 0.80 5.16
 -1 -9 -4 -1.92 2.45
 -1 -9 -4 -1.92 2.45
 1 -9 4 -2.58 -2.27
 1 9 4 -1.92 -2.45
 -1 9 -4 -2.58 2.27
 -3 -9 -4 1.79 -2.43
 -3 -9 -4 1.79 -2.43
 3 -9 4 0.61 -1.06
 3 9 4 1.79 2.43
 -3 9 -4 0.61 1.06
 5 -9 4 0.91 9.75
 -5 -9 -4 1.51 -5.79
 -5 -9 -4 1.51 -5.79
 5 9 4 1.51 5.79
 -5 9 -4 0.91 -9.75
 -7 -9 -4 -4.40 1.29
 7 -9 4 -5.22 -1.36
 -7 -9 -4 -4.40 1.29
 7 9 4 -4.40 -1.29
 -7 9 -4 -5.22 1.36
 9 -9 4 -6.32 -2.11
 -9 -9 -4 -6.54 2.74
 -9 -9 -4 -6.54 2.74
 9 9 4 -6.54 -2.74
 -9 9 -4 -6.32 2.11
 -11 -9 -4 -3.27 2.51
 11 -9 4 -3.18 3.22
 -11 -9 -4 -3.27 2.51
 11 9 4 -3.27 -2.51
 -11 9 -4 -3.18 -3.22
 13 -9 4 2.75 1.36
 -13 -9 -4 2.61 1.74
 -13 -9 -4 2.61 1.74
 13 9 4 2.61 -1.74
 -13 9 -4 2.75 -1.36
 15 -9 4 4.42 -0.06
 -15 -9 -4 4.76 0.61
 -15 -9 -4 4.76 0.61
 -15 9 -4 4.42 0.06
 15 9 4 4.76 -0.61
 17 -9 4 0.00 -1.37
 -17 -9 -4 1.19 -1.29
 -17 -9 -4 1.19 -1.29
 17 9 4 1.19 1.29
 -17 9 -4 0.00 1.37
 -19 -9 -4 -1.24 -0.59
 -19 -9 -4 -1.24 -0.59
 -19 9 -4 -1.49 1.01
 19 9 4 -1.24 0.59
 -21 -9 -4 -4.35 2.80
 21 9 4 -4.35 -2.80
 -21 9 -4 -4.39 -1.09
 -23 -9 -4 -2.97 2.64
 -23 9 -4 -3.23 -1.25
 23 9 4 -2.97 -2.64
 26 -10 -4 0.35 1.07
 -26 -10 4 1.00 0.47
 26 10 -4 1.00 -0.47
 24 -10 -4 -3.57 1.63
 -24 -10 4 -3.70 3.47
 24 10 -4 -3.70 -3.47
 22 -10 -4 -0.63 7.22
 -22 -10 4 -0.03 -0.29
 22 10 -4 -0.03 0.29
 20 -10 -4 0.45 2.16
 -20 -10 4 0.92 -2.33
 20 10 -4 0.92 2.33
 18 -10 -4 -1.34 1.62
 -18 -10 4 -1.99 0.27
 18 10 -4 -1.99 -0.27
 -18 10 4 -1.34 -1.62
 16 -10 -4 -0.06 -3.47
 16 -10 -4 -0.06 -3.47
 -16 -10 4 -1.25 3.72
 -16 10 4 -0.06 3.47
 16 10 -4 -1.25 -3.72
 14 -10 -4 0.55 1.00
 14 -10 -4 0.55 1.00
 -14 -10 4 0.67 -0.66
 14 10 -4 0.67 0.66
 -14 10 4 0.55 -1.00
 12 -10 -4 -5.39 -2.07
 12 -10 -4 -5.39 -2.07
 -12 -10 4 -4.66 4.81
 12 10 -4 -4.66 -4.81
 -12 10 4 -5.39 2.07
 -10 -10 4 -3.10 -1.62
 10 -10 -4 -4.00 1.87
 -10 -10 4 -3.10 -1.62
 10 -10 -4 -4.00 1.87
 10 10 -4 -3.10 1.62
 -10 10 4 -4.00 -1.87
 8 -10 -4 -6.31 -0.14
 -8 -10 4 -5.47 0.41
 8 10 -4 -5.47 -0.41
 -8 10 4 -6.31 0.14
 -6 -10 4 -3.20 -4.69
 6 -10 -4 -2.85 4.34
 6 -10 -4 -2.85 4.34
 -6 10 4 -2.85 -4.34
 6 10 -4 -3.20 4.69
 -4 -10 4 -0.41 -1.39
 4 -10 -4 -0.26 -1.70
 4 -10 -4 -0.26 -1.70
 4 10 -4 -0.41 1.39
 -4 10 4 -0.26 1.70
 2 -10 -4 2.75 1.29
 -2 -10 4 2.97 -0.58
 2 -10 -4 2.75 1.29
 -2 10 4 2.75 -1.29
 2 10 -4 2.97 0.58
 0 -10 -4 0.77 -1.40
 0 -10 -4 0.77 -1.40
 0 -10 4 0.51 0.77
 0 10 -4 0.51 -0.77
 0 10 4 0.77 1.40
 -2 -10 -4 -1.32 -2.09
 2 -10 4 -1.04 2.33
 -2 -10 -4 -1.32 -2.09
 -2 10 -4 -1.04 -2.33
 2 10 4 -1.32 2.09
 4 -10 4 0.01 -8.02
 -4 -10 -4 0.08 7.51
 -4 -10 -4 0.08 7.51
 4 10 4 0.08 -7.51
 -4 10 -4 0.01 8.02
 -6 -10 -4 1.64 12.23
 6 -10 4 1.73 -10.30
 -6 -10 -4 1.64 12.23
 6 10 4 1.64 -12.23
 -6 10 -4 1.73 10.30
 8 -10 4 5.62 -0.94
 -8 -10 -4 6.03 2.77
 -8 -10 -4 6.03 2.77
 8 10 4 6.03 -2.77
 -8 10 -4 5.62 0.94
 -10 -10 -4 8.25 0.11
 10 -10 4 8.83 -0.63
 -10 -10 -4 8.25 0.11
 -10 10 -4 8.83 0.63
 10 10 4 8.25 -0.11
 12 -10 4 4.58 -0.38
 -12 -10 -4 5.55 -1.58
 -12 -10 -4 5.55 -1.58
 -12 10 -4 4.58 0.38
 12 10 4 5.55 1.58
 14 -10 4 1.28 1.39
 -14 -10 -4 1.07 -3.50
 -14 -10 -4 1.07 -3.50
 14 10 4 1.07 3.50
 -14 10 -4 1.28 -1.39
 -16 -10 -4 -0.71 -0.08
 -16 -10 -4 -0.71 -0.08
 16 -10 4 0.28 -0.53
 16 10 4 -0.71 0.08
 -16 10 -4 0.28 0.53
 -18 -10 -4 -0.91 7.15
 -18 -10 -4 -0.91 7.15
 18 10 4 -0.91 -7.15
 -18 10 -4 1.56 -7.41
 -20 -10 -4 0.26 0.72
 -20 10 -4 1.33 -1.45
 20 10 4 0.26 -0.72
 -22 10 -4 3.98 -1.27
 22 10 4 3.95 0.71
 -25 -11 4 0.50 0.65
 25 -11 -4 0.37 -0.60
 25 11 -4 0.50 -0.65
 23 -11 -4 1.35 2.08
 -23 -11 4 1.00 2.28
 23 11 -4 1.00 -2.28
 21 -11 -4 3.20 4.94
 -21 -11 4 2.43 8.50
 21 11 -4 2.43 -8.50
 -19 -11 4 1.80 4.19
 19 -11 -4 2.74 7.57
 19 11 -4 1.80 -4.19
 17 -11 -4 2.24 3.71
 -17 -11 4 2.36 -0.76
 -17 11 4 2.24 -3.71
 17 11 -4 2.36 0.76
 -15 -11 4 0.53 -1.22
 15 -11 -4 0.51 0.46
 -15 11 4 0.51 -0.46
 15 11 -4 0.53 1.22
 13 -11 -4 1.99 -2.94
 -13 -11 4 1.17 3.58
 -13 -11 4 1.17 3.58
 -13 11 4 1.99 2.94
 13 11 -4 1.17 -3.58
 -11 -11 4 -1.28 -4.27
 11 -11 -4 -0.25 3.26
 11 11 -4 -1.28 4.27
 -11 11 4 -0.25 -3.26
 9 -11 -4 0.87 2.24
 -9 -11 4 0.01 -1.82
 9 -11 -4 0.87 2.24
 -9 11 4 0.87 -2.24
 9 11 -4 0.01 1.82
 7 -11 -4 -0.28 -1.36
 7 -11 -4 -0.28 -1.36
 -7 -11 4 -1.01 1.42
 -7 11 4 -0.28 1.36
 7 11 -4 -1.01 -1.42
 5 -11 -4 1.75 1.14
 5 -11 -4 1.75 1.14
 -5 -11 4 1.81 0.68
 -5 11 4 1.75 -1.14
 5 11 -4 1.81 -0.68
 -3 -11 4 -0.45 2.33
 3 -11 -4 -0.78 2.36
 3 -11 -4 -0.78 2.36
 -3 11 4 -0.78 -2.36
 3 11 -4 -0.45 -2.33
 -1 -11 4 -0.23 -0.18
 1 -11 -4 -0.75 3.55
 1 -11 -4 -0.75 3.55
 -1 11 4 -0.75 -3.55
 1 11 -4 -0.23 0.18
 1 -11 4 2.68 -1.00
 -1 -11 -4 1.55 -0.02
 -1 -11 -4 1.55 -0.02
 -1 11 -4 2.68 1.00
 1 11 4 1.55 0.02
 -3 -11 -4 0.68 0.66
 -3 -11 -4 0.68 0.66
 3 -11 4 0.62 1.83
 -3 11 -4 0.62 -1.83
 3 11 4 0.68 -0.66
 5 -11 4 1.92 6.09
 -5 -11 -4 0.94 -7.81
 -5 -11 -4 0.94 -7.81
 5 11 4 0.94 7.81
 -5 11 -4 1.92 -6.09
 -7 -11 -4 1.92 -7.46
 -7 -11 -4 1.92 -7.46
 7 -11 4 1.15 6.75
 -7 11 -4 1.15 -6.75
 7 11 4 1.92 7.46
 -9 -11 -4 -0.87 1.72
 9 -11 4 -1.08 0.65
 -9 -11 -4 -0.87 1.72
 -9 11 -4 -1.08 -0.65
 9 11 4 -0.87 -1.72
 -11 -11 -4 -2.81 2.61
 -11 -11 -4 -2.81 2.61
 11 -11 4 -4.20 -0.01
 11 11 4 -2.81 -2.61
 -11 11 -4 -4.20 0.01
 -13 -11 -4 -3.12 6.57
 -13 -11 -4 -3.12 6.57
 13 -11 4 -3.12 2.13
 -13 11 -4 -3.12 -2.13
 13 11 4 -3.12 -6.57
 -15 -11 -4 -6.37 10.16
 -15 -11 -4 -6.37 10.16
 15 -11 4 -6.35 7.33
 -15 11 -4 -6.35 -7.33
 15 11 4 -6.37 -10.16
 -17 -11 -4 1.13 1.44
 -17 -11 -4 1.13 1.44
 17 11 4 1.13 -1.44
 -17 11 -4 -0.25 -2.93
 -19 -11 -4 0.63 0.45
 -19 -11 -4 0.63 0.45
 -19 11 -4 -0.70 -0.28
 19 11 4 0.63 -0.45
 24 -12 -4 1.30 -0.09
 -24 -12 4 1.49 -1.43
 24 12 -4 1.49 1.43
 -22 -12 4 1.13 -5.14
 22 -12 -4 1.03 -4.46
 22 12 -4 1.13 5.14
 -20 -12 4 -3.37 -2.15
 20 -12 -4 -4.80 -6.72
 20 12 -4 -3.37 2.15
 -18 -12 4 0.12 8.97
 18 -12 -4 -2.02 -6.21
 18 12 -4 0.12 -8.97
 -16 -12 4 -0.61 3.30
 16 -12 -4 -2.87 5.30
 -16 12 4 -2.87 -5.30
 16 12 -4 -0.61 -3.30
 14 -12 -4 2.34 10.09
 -14 -12 4 4.76 -3.19
 -14 12 4 2.34 -10.09
 14 12 -4 4.76 3.19
 12 -12 -4 1.06 11.61
 -12 -12 4 2.32 -10.01
 12 12 -4 2.32 10.01
 -12 12 4 1.06 -11.61
 -10 -12 4 5.90 -1.98
 10 -12 -4 5.61 0.50
 10 12 -4 5.90 1.98
 -10 12 4 5.61 -0.50
 8 -12 -4 -0.19 0.40
 -8 -12 4 -0.37 0.30
 8 12 -4 -0.37 -0.30
 -8 12 4 -0.19 -0.40
 6 -12 -4 -3.30 -5.88
 -6 -12 4 -3.83 -3.36
 6 12 -4 -3.83 3.36
 -6 12 4 -3.30 5.88
 -4 -12 4 -4.11 -4.57
 4 -12 -4 -2.74 -5.45
 -4 12 4 -2.74 5.45
 4 12 -4 -4.11 4.57
 2 -12 -4 -2.28 -6.93
 2 -12 -4 -2.28 -6.93
 -2 -12 4 -3.22 -8.73
 2 12 -4 -3.22 8.73
 -2 12 4 -2.28 6.93
 0 -12 4 -3.16 -6.68
 0 -12 -4 -1.25 -1.28
 0 -12 -4 -1.25 -1.28
 0 12 4 -1.25 1.28
 0 12 -4 -3.16 6.68
 2 -12 4 -1.43 -1.53
 -2 -12 -4 -1.23 -1.21
 -2 -12 -4 -1.23 -1.21
 -2 12 -4 -1.43 1.53
 2 12 4 -1.23 1.21
 -4 -12 -4 1.61 -1.11
 -4 -12 -4 1.61 -1.11
 4 -12 4 1.11 0.03
 4 12 4 1.61 1.11
 -4 12 -4 1.11 -0.03
 6 -12 4 -1.00 0.17
 -6 -12 -4 -0.80 1.09
 -6 -12 -4 -0.80 1.09
 6 12 4 -0.80 -1.09
 -6 12 -4 -1.00 -0.17
 -8 -12 -4 -2.39 3.01
 8 -12 4 -2.73 -0.54
 -8 -12 -4 -2.39 3.01
 -8 12 -4 -2.73 0.54
 8 12 4 -2.39 -3.01
 10 -12 4 -0.71 2.02
 -10 -12 -4 -0.92 1.10
 -10 -12 -4 -0.92 1.10
 10 12 4 -0.92 -1.10
 -10 12 -4 -0.71 -2.02
 12 -12 4 -0.25 -0.13
 -12 -12 -4 -0.65 -1.14
 -12 -12 -4 -0.65 -1.14
 12 12 4 -0.65 1.14
 -12 12 -4 -0.25 0.13
 -14 -12 -4 5.30 -3.25
 -14 -12 -4 5.30 -3.25
 14 -12 4 4.55 -3.69
 -14 12 -4 4.55 3.69
 14 12 4 5.30 3.25
 -16 -12 -4 5.25 -5.34
 16 -12 4 5.75 -5.18
 -16 -12 -4 5.25 -5.34
 -16 12 -4 5.75 5.18
 16 12 4 5.25 5.34
 -18 -12 -4 0.45 -5.09
 -18 -12 -4 0.45 -5.09
 18 12 4 0.45 5.09
 -18 12 -4 1.41 3.08
 21 -13 -4 0.48 3.29
 -21 -13 4 1.22 4.37
 21 13 -4 1.22 -4.37
 -19 -13 4 3.67 -9.15
 19 -13 -4 4.11 5.92
 19 13 -4 3.67 9.15
 -17 -13 4 -0.10 -6.21
 17 -13 -4 1.85 0.14
 17 13 -4 -0.10 6.21
 -15 -13 4 -7.00 -2.34
 15 -13 -4 -3.92 -8.23
 -15 13 4 -3.92 8.23
 15 13 -4 -7.00 2.34
 13 -13 -4 -2.20 -12.27
 -13 -13 4 -5.02 6.36
 -13 13 4 -2.20 12.27
 13 13 -4 -5.02 -6.36
 11 -13 -4 -2.22 -5.02
 -11 -13 4 -3.27 4.41
 -11 13 4 -2.22 5.02
 11 13 -4 -3.27 -4.41
 -9 -13 4 -5.28 -3.98
 9 -13 -4 -4.41 2.61
 -9 13 4 -4.41 -2.61
 9 13 -4 -5.28 3.98
 -7 -13 4 4.14 -5.59
 7 -13 -4 4.05 7.18
 7 13 -4 4.14 5.59
 -7 13 4 4.05 -7.18
 -5 -13 4 3.95 3.72
 5 -13 -4 3.04 7.99
 -5 13 4 3.04 -7.99
 5 13 -4 3.95 -3.72
 -3 -13 4 2.39 2.71
 3 -13 -4 2.24 9.56
 -3 13 4 2.24 -9.56
 3 13 -4 2.39 -2.71
 -1 -13 4 1.58 9.82
 1 -13 -4 0.37 6.07
 1 13 -4 1.58 -9.82
 -1 13 4 0.37 -6.07
 1 -13 4 2.28 2.76
 -1 -13 -4 1.01 0.34
 -1 13 -4 2.28 -2.76
 1 13 4 1.01 -0.34
 3 -13 4 -3.39 -0.47
 -3 -13 -4 -3.86 0.25
 3 13 4 -3.86 -0.25
 -3 13 -4 -3.39 0.47
 -5 -13 -4 -4.09 0.28
 5 -13 4 -3.99 -1.54
 5 13 4 -4.09 -0.28
 -5 13 -4 -3.99 1.54
 7 -13 4 1.63 0.50
 -7 -13 -4 0.91 -3.13
 -7 -13 -4 0.91 -3.13
 7 13 4 0.91 3.13
 -7 13 -4 1.63 -0.50
 -9 -13 -4 -1.74 -0.42
 9 -13 4 -2.46 -0.83
 -9 -13 -4 -1.74 -0.42
 -9 13 -4 -2.46 0.83
 9 13 4 -1.74 0.42
 11 -13 4 -1.95 0.09
 -11 -13 -4 -2.03 2.82
 -11 -13 -4 -2.03 2.82
 -11 13 -4 -1.95 -0.09
 11 13 4 -2.03 -2.82
 -13 -13 -4 -2.79 0.99
 -13 -13 -4 -2.79 0.99
 13 -13 4 -2.60 -0.58
 13 13 4 -2.79 -0.99
 -13 13 -4 -2.60 0.58
 -15 -13 -4 -2.78 -1.57
 15 -13 4 -2.91 2.08
 -15 -13 -4 -2.78 -1.57
 15 13 4 -2.78 1.57
 -15 13 -4 -2.91 -2.08
 -17 -13 -4 -2.83 6.16
 -17 -13 -4 -2.83 6.16
 -17 13 -4 -3.58 -4.18
 17 13 4 -2.83 -6.16
 20 -14 -4 -2.70 -1.62
 -20 -14 4 -4.18 -0.20
 20 14 -4 -4.18 0.20
 18 -14 -4 -4.07 -0.76
 -18 -14 4 -3.25 2.66
 18 14 -4 -3.25 -2.66
 16 -14 -4 1.76 1.31
 -16 -14 4 3.43 0.33
 16 14 -4 3.43 -0.33
 -14 -14 4 2.41 -5.52
 14 -14 -4 -0.31 7.76
 14 14 -4 2.41 5.52
 -14 14 4 -0.31 -7.76
 12 -14 -4 0.20 5.46
 -12 -14 4 0.87 -6.74
 12 14 -4 0.87 6.74
 -12 14 4 0.20 -5.46
 -10 -14 4 2.22 1.62
 10 -14 -4 2.41 -0.85
 10 14 -4 2.22 -1.62
 -10 14 4 2.41 0.85
 8 -14 -4 1.56 -6.79
 -8 -14 4 1.43 7.22
 -8 14 4 1.56 6.79
 8 14 -4 1.43 -7.22
 -6 -14 4 -2.12 2.17
 6 -14 -4 -1.39 -3.45
 -6 14 4 -1.39 3.45
 6 14 -4 -2.12 -2.17
 -4 -14 4 -0.13 0.60
 4 -14 -4 0.16 -8.32
 -4 14 4 0.16 8.32
 4 14 -4 -0.13 -0.60
 2 -14 -4 0.20 -6.35
 -2 -14 4 0.33 -2.62
 -2 14 4 0.20 6.35
 2 14 -4 0.33 2.62
 0 -14 4 -1.33 -1.63
 0 -14 -4 -0.89 -2.54
 0 14 4 -0.89 2.54
 0 14 -4 -1.33 1.63
 -2 -14 -4 0.70 -0.13
 2 -14 4 0.06 1.65
 2 14 4 0.70 0.13
 -2 14 -4 0.06 -1.65
 -4 -14 -4 2.63 -4.81
 4 -14 4 2.51 2.14
 -4 14 -4 2.51 -2.14
 4 14 4 2.63 4.81
 -6 -14 -4 -1.11 0.46
 6 -14 4 -1.69 -3.82
 6 14 4 -1.11 -0.46
 -6 14 -4 -1.69 3.82
 8 -14 4 0.47 -2.63
 -8 -14 -4 0.14 -3.55
 8 14 4 0.14 3.55
 -8 14 -4 0.47 2.63
 -10 -14 -4 4.49 -5.43
 10 -14 4 3.99 -6.28
 10 14 4 4.49 5.43
 -10 14 -4 3.99 6.28
 12 -14 4 3.78 1.17
 -12 -14 -4 3.22 -2.03
 -12 14 -4 3.78 -1.17
 12 14 4 3.22 2.03
 -14 -14 -4 3.41 2.14
 14 -14 4 3.78 0.80
 -14 14 -4 3.78 -0.80
 14 14 4 3.41 -2.14
 -17 -15 4 -0.61 -2.46
 17 -15 -4 0.64 0.74
 17 15 -4 -0.61 2.46
 15 -15 -4 0.46 -1.25
 -15 -15 4 -0.37 3.06
 15 15 -4 -0.37 -3.06
 -13 -15 4 3.24 2.12
 13 -15 -4 4.11 -1.98
 -13 15 4 4.11 1.98
 13 15 -4 3.24 -2.12
 -11 -15 4 1.77 -0.52
 11 -15 -4 0.82 0.25
 11 15 -4 1.77 0.52
 -11 15 4 0.82 -0.25
 -9 -15 4 -0.88 -8.92
 9 -15 -4 -0.49 8.59
 9 15 -4 -0.88 8.92
 -9 15 4 -0.49 -8.59
 7 -15 -4 -1.35 5.34
 -7 -15 4 -1.60 -6.61
 7 15 -4 -1.60 6.61
 -7 15 4 -1.35 -5.34
 5 -15 -4 0.52 4.73
 -5 -15 4 0.26 -4.37
 -5 15 4 0.52 -4.73
 5 15 -4 0.26 4.37
 3 -15 -4 -0.72 5.31
 -3 -15 4 -0.96 -0.45
 -3 15 4 -0.72 -5.31
 3 15 -4 -0.96 0.45
 1 -15 -4 1.79 0.58
 -1 -15 4 0.58 0.82
 -1 15 4 1.79 -0.58
 1 15 -4 0.58 -0.82
 1 -15 4 1.33 -3.33
 -1 -15 -4 1.73 -0.78
 1 15 4 1.73 0.78
 -1 15 -4 1.33 3.33
 -3 -15 -4 0.22 2.37
 -3 15 -4 0.34 4.44
 3 15 4 0.22 -2.37
 5 -15 4 1.23 -2.94
 -5 -15 -4 0.56 4.96
 -5 15 -4 1.23 2.94
 5 15 4 0.56 -4.96
 -7 -15 -4 3.42 5.15
 7 -15 4 3.05 -4.99
 7 15 4 3.42 -5.15
 -7 15 -4 3.05 4.99
 -9 -15 -4 0.12 5.63
 9 -15 4 1.01 4.05
 9 15 4 0.12 -5.63
 -9 15 -4 1.01 -4.05
 -11 -15 -4 -0.24 1.88
 11 -15 4 -0.22 1.77
 -11 15 -4 -0.22 -1.77
 11 15 4 -0.24 -1.88
 -14 -16 4 -0.47 -0.07
 14 -16 -4 -0.27 -0.64
 14 16 -4 -0.47 0.07
 -12 -16 4 -4.31 2.78
 12 -16 -4 -3.87 0.88
 -12 16 4 -3.87 -0.88
 12 16 -4 -4.31 -2.78
 10 -16 -4 0.21 -3.72
 -10 -16 4 0.72 4.28
 10 16 -4 0.72 -4.28
 -10 16 4 0.21 3.72
 -8 -16 4 3.80 4.38
 8 -16 -4 2.81 -4.23
 8 16 -4 3.80 -4.38
 -8 16 4 2.81 4.23
 6 -16 -4 0.54 -5.08
 -6 -16 4 0.57 3.80
 6 16 -4 0.57 -3.80
 -6 16 4 0.54 5.08
 -4 -16 4 -2.37 -1.24
 4 -16 -4 -2.28 -1.75
 4 16 -4 -2.37 1.24
 -4 16 4 -2.28 1.75
 2 -16 -4 -1.70 -4.36
 -2 -16 4 -1.19 -2.54
 -2 16 4 -1.70 4.36
 2 16 -4 -1.19 2.54
 0 -16 -4 -4.57 -1.21
 0 -16 4 -4.16 -0.83
 0 16 -4 -4.16 0.83
 0 16 4 -4.57 1.21
 2 -16 4 -2.23 1.05
 -2 -16 -4 -2.05 -0.40
 2 16 4 -2.05 0.40
 -2 16 -4 -2.23 -1.05
 -4 -16 -4 0.01 -1.03
 4 -16 4 -0.03 0.18
 4 16 4 0.01 1.03
 -4 16 -4 -0.03 -0.18
 6 -16 4 -2.72 7.10
 -6 -16 -4 -2.42 -4.94
 6 16 4 -2.42 4.94
 -6 16 -4 -2.72 -7.10
 -8 -16 -4 -2.83 -2.76
 8 -16 4 -1.43 3.83
 8 16 4 -2.83 2.76
 -8 16 -4 -1.43 -3.83
 -9 -17 4 -2.72 -1.56
 9 -17 -4 -2.40 0.47
 9 17 -4 -2.72 1.56
 7 -17 -4 -0.32 2.04
 -7 -17 4 -0.20 -2.58
 -7 17 4 -0.32 -2.04
 7 17 -4 -0.20 2.58
 5 -17 -4 0.86 1.94
 -5 -17 4 1.58 -2.95
 -5 17 4 0.86 -1.94
 5 17 -4 1.58 2.95
 -3 -17 4 2.14 -0.68
 3 -17 -4 3.14 -0.42
 -3 17 4 3.14 0.42
 3 17 -4 2.14 0.68
 1 -17 -4 2.58 3.63
 -1 -17 4 2.70 -2.55
 1 17 -4 2.70 2.55
 -1 17 4 2.58 -3.63
 -1 -17 -4 2.80 0.34
 1 -17 4 2.39 -1.37
 -1 17 -4 2.39 1.37
 1 17 4 2.80 -0.34
 -3 -17 -4 -0.10 -0.87
 3 -17 4 -0.41 0.18
 -3 17 -4 -0.41 -0.18
 3 17 4 -0.10 0.87
 33 -1 -5 2.66 -1.39
 33 1 -5 -4.45 -0.74
 31 -1 -5 5.57 -1.39
 31 1 -5 -6.83 -1.39
 29 -1 -5 0.33 0.95
 29 1 -5 -0.96 -3.30
 27 -1 -5 0.24 0.50
 27 1 -5 -0.78 0.99
 27 1 -5 -0.78 0.99
 25 -1 -5 -2.38 2.31
 25 1 -5 1.77 3.76
 25 1 -5 1.77 3.76
 23 -1 -5 -5.61 5.42
 23 1 -5 5.30 -6.52
 23 1 -5 5.30 -6.52
 21 -1 -5 -10.34 2.91
 21 1 -5 10.12 -3.78
 21 1 -5 10.12 -3.78
 19 -1 -5 -3.60 3.10
 19 1 -5 2.91 -5.05
 19 1 -5 2.91 -5.05
 17 -1 -5 14.67 -0.04
 17 -1 -5 14.67 -0.04
 17 1 -5 -15.13 0.94
 17 1 -5 -15.13 0.94
 15 -1 -5 19.26 -3.40
 15 -1 -5 19.26 -3.40
 15 -1 -5 19.26 -3.40
 15 1 -5 -19.11 -0.69
 13 -1 -5 6.84 3.98
 13 -1 -5 6.84 3.98
 13 -1 -5 6.84 3.98
 13 1 -5 -8.03 -2.57
 13 1 -5 -8.03 -2.57
 11 -1 -5 -19.28 4.79
 11 -1 -5 -19.28 4.79
 11 -1 -5 -19.28 4.79
 11 1 -5 20.16 -4.64
 11 1 -5 20.16 -4.64
 9 -1 -5 -6.84 -0.60
 9 -1 -5 -6.84 -0.60
 9 1 -5 7.08 -2.44
 9 1 -5 7.08 -2.44
 7 -1 -5 51.69 -10.64
 7 -1 -5 51.69 -10.64
 7 1 -5 -50.20 5.86
 7 1 -5 -50.20 5.86
 5 -1 -5 45.56 9.02
 5 1 -5 -43.28 -15.22
 5 1 -5 -43.28 -15.22
 3 -1 -5 178.08 11.32
 -3 1 5 178.08 -11.32
 3 1 -5 -179.66 -5.94
 3 1 -5 -179.66 -5.94
 1 -1 -5 18.26 -4.75
 -1 -1 5 -17.42 1.20
 1 1 -5 -17.42 -1.20
 -1 1 5 18.26 4.75
 -1 1 5 18.26 4.75
 1 -1 5 -21.16 4.54
 -1 -1 -5 20.73 4.54
 -1 -1 -5 20.73 4.54
 1 1 5 20.73 -4.54
 1 1 5 20.73 -4.54
 -1 1 -5 -21.16 -4.54
 -1 1 -5 -21.16 -4.54
 -3 -1 -5 -13.82 -1.18
 3 -1 5 13.45 -0.31
 -3 -1 -5 -13.82 -1.18
 -3 1 -5 13.45 0.31
 3 1 5 -13.82 1.18
 -3 1 -5 13.45 0.31
 -5 -1 -5 -18.39 -5.51
 -5 -1 -5 -18.39 -5.51
 5 -1 5 17.16 -6.17
 -5 1 -5 17.16 6.17
 -7 -1 -5 -7.24 -2.39
 7 1 5 -7.24 2.39
 -9 -1 -5 7.10 -4.62
 9 1 5 7.10 4.62
 -11 -1 -5 9.16 2.75
 11 1 5 9.16 -2.75
 -13 -1 -5 1.51 1.79
 13 1 5 1.51 -1.79
 -15 -1 -5 -6.15 -0.34
 15 1 5 -6.15 0.34
 -17 -1 -5 -2.63 -1.61
 17 1 5 -2.63 1.61
 32 -2 -5 -3.19 2.18
 32 2 -5 4.22 0.34
 30 -2 -5 -1.35 -1.20
 30 2 -5 2.07 0.69
 30 2 -5 2.07 0.69
 28 -2 -5 2.55 -3.13
 28 2 -5 -1.68 0.85
 28 2 -5 -1.68 0.85
 26 -2 -5 2.27 -2.71
 26 2 -5 -1.85 -5.25
 26 2 -5 -1.85 -5.25
 24 -2 -5 1.03 -2.39
 24 2 -5 0.00 -0.80
 24 2 -5 0.00 -0.80
 22 -2 -5 8.67 -3.96
 22 2 -5 -8.67 5.24
 22 2 -5 -8.67 5.24
 20 -2 -5 11.71 6.06
 20 -2 -5 11.71 6.06
 20 2 -5 -12.22 12.01
 20 2 -5 -12.22 12.01
 18 -2 -5 -2.31 -1.48
 18 -2 -5 -2.31 -1.48
 18 2 -5 2.14 4.46
 18 2 -5 2.14 4.46
 16 -2 -5 -10.11 4.77
 16 -2 -5 -10.11 4.77
 16 2 -5 9.03 6.47
 16 2 -5 9.03 6.47
 14 -2 -5 -8.64 -2.22
 14 -2 -5 -8.64 -2.22
 14 2 -5 9.64 3.74
 14 2 -5 9.64 3.74
 12 -2 -5 19.26 -5.91
 12 -2 -5 19.26 -5.91
 12 2 -5 -19.05 7.73
 12 2 -5 -19.05 7.73
 10 2 -5 -38.00 13.15
 10 2 -5 -38.00 13.15
 8 -2 -5 19.77 7.16
 8 -2 -5 19.77 7.16
 -8 2 5 19.77 -7.16
 8 2 -5 -18.70 -4.14
 8 2 -5 -18.70 -4.14
 6 -2 -5 14.68 -9.02
 6 -2 -5 14.68 -9.02
 6 2 -5 -16.26 13.37
 6 2 -5 -16.26 13.37
 -6 2 5 14.68 9.02
 4 -2 -5 -52.16 -7.58
 4 -2 -5 -52.16 -7.58
 -4 -2 5 54.81 -1.17
 4 2 -5 54.81 1.17
 4 2 -5 54.81 1.17
 -4 2 5 -52.16 7.58
 2 -2 -5 -56.71 1.00
 -2 -2 5 57.83 4.54
 2 -2 -5 -56.71 1.00
 2 2 -5 57.83 -4.54
 2 2 -5 57.83 -4.54
 -2 2 5 -56.71 -1.00
 0 -2 -5 19.00 20.74
 0 -2 -5 19.00 20.74
 0 -2 5 -19.84 20.99
 0 2 -5 -19.84 -20.99
 0 2 5 19.00 -20.74
 0 2 -5 -19.84 -20.99
 -2 -2 -5 -2.64 -0.52
 2 -2 5 2.57 2.40
 2 2 5 -2.64 0.52
 -2 2 -5 2.57 -2.40
 -2 2 -5 2.57 -2.40
 -4 -2 -5 6.05 5.11
 -4 -2 -5 6.05 5.11
 4 -2 5 -5.41 2.66
 4 2 5 6.05 -5.11
 -8 -2 -5 7.25 1.48
 8 -2 5 -7.16 0.86
 -10 -2 -5 -3.15 -0.29
 10 -2 5 2.70 1.25
 10 2 5 -3.15 0.29
 -12 -2 -5 -10.57 2.81
 12 2 5 -10.57 -2.81
 -14 -2 -5 -1.32 5.49
 14 2 5 -1.32 -5.49
 -16 -2 -5 4.13 3.00
 16 2 5 4.13 -3.00
 18 2 5 5.62 -1.19
 20 2 5 2.28 -1.27
 31 -3 -5 0.55 -0.80
 -31 -3 5 -0.64 0.78
 31 3 -5 -0.64 -0.78
 29 -3 -5 2.21 3.87
 -29 -3 5 -2.37 -1.47
 29 3 -5 -2.37 1.47
 29 3 -5 -2.37 1.47
 27 -3 -5 1.86 4.08
 27 3 -5 -1.30 0.50
 27 3 -5 -1.30 0.50
 25 -3 -5 5.93 0.01
 25 3 -5 -6.62 2.67
 25 3 -5 -6.62 2.67
 23 -3 -5 3.68 6.58
 23 -3 -5 3.68 6.58
 23 3 -5 -3.89 2.75
 23 3 -5 -3.89 2.75
 21 -3 -5 -1.50 -0.59
 21 -3 -5 -1.50 -0.59
 21 3 -5 1.26 -5.80
 21 3 -5 1.26 -5.80
 19 -3 -5 2.83 -3.39
 19 -3 -5 2.83 -3.39
 19 3 -5 -2.53 -1.11
 19 3 -5 -2.53 -1.11
 17 -3 -5 7.01 -0.50
 17 -3 -5 7.01 -0.50
 17 3 -5 -7.01 -1.73
 17 3 -5 -7.01 -1.73
 15 -3 -5 13.83 -1.75
 15 -3 -5 13.83 -1.75
 15 3 -5 -13.26 -1.63
 15 3 -5 -13.26 -1.63
 13 -3 -5 3.30 -0.09
 13 -3 -5 3.30 -0.09
 13 3 -5 -3.73 0.59
 13 3 -5 -3.73 0.59
 11 -3 -5 -5.72 6.05
 11 -3 -5 -5.72 6.05
 11 3 -5 5.62 -5.12
 -11 3 5 -5.72 -6.05
 -9 -3 5 5.20 0.95
 9 3 -5 5.20 -0.95
 9 3 -5 5.20 -0.95
 -9 3 5 -5.29 1.53
 7 -3 -5 -19.86 -2.57
 7 3 -5 20.74 -6.84
 -7 3 5 -19.86 2.57
 7 3 -5 20.74 -6.84
 -5 -3 5 -31.81 3.86
 5 -3 -5 31.51 7.74
 5 -3 -5 31.51 7.74
 5 3 -5 -31.81 -3.86
 5 3 -5 -31.81 -3.86
 -5 3 5 31.51 -7.74
 3 -3 -5 9.32 8.46
 3 -3 -5 9.32 8.46
 -3 -3 5 -10.56 6.51
 -3 -3 5 -10.56 6.51
 -3 3 5 9.32 -8.46
 3 3 -5 -10.56 -6.51
 3 3 -5 -10.56 -6.51
 -1 -3 5 -26.92 -2.55
 1 -3 -5 27.52 4.16
 -1 -3 5 -26.92 -2.55
 1 -3 -5 27.52 4.16
 1 3 -5 -26.92 2.55
 1 3 -5 -26.92 2.55
 -1 3 5 27.52 -4.16
 1 -3 5 17.61 -2.00
 -1 -3 -5 -17.42 2.30
 -1 3 -5 17.61 2.00
 1 3 5 -17.42 -2.30
 -3 -3 -5 15.23 11.86
 -3 -3 -5 15.23 11.86
 3 -3 5 -14.93 12.52
 -3 3 -5 -14.93 -12.52
 3 3 5 15.23 -11.86
 -5 -3 -5 17.31 2.94
 5 -3 5 -17.99 4.97
 -5 -3 -5 17.31 2.94
 5 3 5 17.31 -2.94
 7 -3 5 -6.54 1.19
 -7 -3 -5 5.85 2.52
 -7 -3 -5 5.85 2.52
 7 3 5 5.85 -2.52
 9 -3 5 -0.93 2.21
 -9 -3 -5 1.71 2.33
 11 -3 5 -4.26 -1.48
 -11 -3 -5 3.96 -0.67
 11 3 5 3.96 0.67
 13 -3 5 -9.49 -1.08
 -13 -3 -5 10.62 -3.65
 -15 -3 -5 5.41 -0.90
 15 -3 5 -5.47 1.47
 15 3 5 5.41 0.90
 -17 -3 -5 -3.51 3.78
 17 3 5 -3.51 -3.78
 19 3 5 -4.67 -2.19
 21 3 5 -2.73 -1.19
 23 3 5 -4.01 -0.94
 32 -4 -5 -1.45 0.37
 -32 -4 5 1.63 0.80
 32 4 -5 1.63 -0.80
 -30 -4 5 3.21 -1.44
 30 -4 -5 -2.85 4.00
 30 4 -5 3.21 1.44
 30 4 -5 3.21 1.44
 -28 -4 5 1.85 -1.20
 28 -4 -5 -2.50 2.10
 28 4 -5 1.85 1.20
 28 4 -5 1.85 1.20
 -26 -4 5 3.97 -4.12
 26 -4 -5 -3.17 5.87
 26 -4 -5 -3.17 5.87
 26 4 -5 3.97 4.12
 26 4 -5 3.97 4.12
 24 -4 -5 -2.05 -0.53
 24 -4 -5 -2.05 -0.53
 -24 -4 5 2.40 -0.02
 24 4 -5 2.40 0.02
 24 4 -5 2.40 0.02
 22 -4 -5 0.14 -2.98
 -22 -4 5 0.84 -1.91
 22 -4 -5 0.14 -2.98
 22 4 -5 0.84 1.91
 22 4 -5 0.84 1.91
 -20 -4 5 1.74 2.07
 20 -4 -5 -1.54 -1.69
 20 -4 -5 -1.54 -1.69
 20 4 -5 1.74 -2.07
 20 4 -5 1.74 -2.07
 -18 -4 5 0.01 1.08
 18 -4 -5 1.30 1.27
 18 -4 -5 1.30 1.27
 18 4 -5 0.01 -1.08
 18 4 -5 0.01 -1.08
 16 -4 -5 3.36 -1.43
 -16 -4 5 -3.65 -2.31
 16 -4 -5 3.36 -1.43
 16 4 -5 -3.65 2.31
 16 4 -5 -3.65 2.31
 14 -4 -5 7.73 -0.03
 -14 -4 5 -7.43 1.16
 14 -4 -5 7.73 -0.03
 14 4 -5 -7.43 -1.16
 -14 4 5 7.73 0.03
 14 4 -5 -7.43 -1.16
 12 -4 -5 13.09 -1.69
 12 -4 -5 13.09 -1.69
 12 4 -5 -13.06 -0.20
 -12 4 5 13.09 1.69
 12 4 -5 -13.06 -0.20
 10 -4 -5 9.15 0.81
 10 -4 -5 9.15 0.81
 -10 -4 5 -8.72 5.33
 -10 4 5 9.15 -0.81
 10 4 -5 -8.72 -5.33
 10 4 -5 -8.72 -5.33
 6 -4 -5 3.96 8.96
 6 -4 -5 3.96 8.96
 6 4 -5 -4.35 -7.56
 -6 4 5 3.96 -8.96
 4 -4 -5 7.08 -2.54
 -4 -4 5 -7.26 -3.00
 -4 -4 5 -7.26 -3.00
 4 -4 -5 7.08 -2.54
 -4 4 5 7.08 2.54
 4 4 -5 -7.26 3.00
 -2 -4 5 -15.67 1.75
 2 -4 -5 14.30 3.13
 -2 -4 5 -15.67 1.75
 -2 4 5 14.30 -3.13
 2 4 -5 -15.67 -1.75
 0 -4 5 -12.65 -0.23
 0 -4 -5 12.62 -3.03
 0 4 5 12.62 3.03
 0 4 -5 -12.65 0.23
 0 4 -5 -12.65 0.23
 -2 -4 -5 27.33 -5.83
 -2 -4 -5 27.33 -5.83
 2 -4 5 -27.35 -2.83
 2 4 5 27.33 5.83
 -2 4 -5 -27.35 2.83
 -4 -4 -5 -4.77 -0.91
 4 -4 5 3.69 -3.46
 -4 -4 -5 -4.77 -0.91
 4 4 5 -4.77 0.91
 6 -4 5 11.42 2.04
 -6 -4 -5 -10.00 2.29
 -6 -4 -5 -10.00 2.29
 6 4 5 -10.00 -2.29
 -8 -4 -5 -5.88 -0.45
 -8 -4 -5 -5.88 -0.45
 8 4 5 -5.88 0.45
 -10 -4 -5 2.88 -2.33
 10 -4 5 -2.28 -1.96
 -12 -4 -5 0.61 1.22
 12 -4 5 -0.96 1.02
 14 -4 5 3.01 3.53
 -14 -4 -5 -4.53 0.17
 14 4 5 -4.53 -0.17
 -16 -4 -5 -3.47 -0.64
 16 -4 5 4.11 1.89
 16 4 5 -3.47 0.64
 18 4 5 1.68 2.83
 20 4 5 2.82 -1.09
 22 4 5 6.31 -1.50
 24 4 5 7.06 -3.69
 -31 -5 5 -4.52 0.49
 31 -5 -5 4.99 0.22
 31 5 -5 -4.52 -0.49
 31 5 -5 -4.52 -0.49
 29 -5 -5 3.37 -3.34
 -29 -5 5 -1.71 1.84
 29 5 -5 -1.71 -1.84
 29 5 -5 -1.71 -1.84
 -27 -5 5 1.56 -0.49
 27 -5 -5 -1.95 -0.09
 27 -5 -5 -1.95 -0.09
 27 5 -5 1.56 0.49
 27 5 -5 1.56 0.49
 -25 -5 5 -0.34 3.44
 25 -5 -5 0.75 -1.86
 25 -5 -5 0.75 -1.86
 25 5 -5 -0.34 -3.44
 25 5 -5 -0.34 -3.44
 23 -5 -5 -0.66 -1.95
 -23 -5 5 0.00 -0.40
 23 -5 -5 -0.66 -1.95
 23 5 -5 0.00 0.40
 23 5 -5 0.00 0.40
 21 -5 -5 4.17 1.35
 21 -5 -5 4.17 1.35
 -21 -5 5 -3.90 -2.59
 21 5 -5 -3.90 2.59
 21 5 -5 -3.90 2.59
 19 -5 -5 0.82 -1.04
 -19 -5 5 -2.02 -4.80
 19 -5 -5 0.82 -1.04
 19 5 -5 -2.02 4.80
 -19 5 5 0.82 1.04
 19 5 -5 -2.02 4.80
 -17 -5 5 7.41 1.28
 17 -5 -5 -7.39 -0.45
 17 -5 -5 -7.39 -0.45
 17 5 -5 7.41 -1.28
 17 5 -5 7.41 -1.28
 -17 5 5 -7.39 0.45
 15 -5 -5 -15.22 0.91
 -15 -5 5 14.77 -4.03
 15 -5 -5 -15.22 0.91
 15 5 -5 14.77 4.03
 15 5 -5 14.77 4.03
 -15 5 5 -15.22 -0.91
 13 -5 -5 -6.94 0.25
 -13 -5 5 7.25 -3.16
 13 -5 -5 -6.94 0.25
 13 5 -5 7.25 3.16
 13 5 -5 7.25 3.16
 -13 5 5 -6.94 -0.25
 -11 -5 5 -5.54 -7.87
 11 -5 -5 6.40 -5.40
 11 -5 -5 6.40 -5.40
 -11 5 5 6.40 5.40
 11 5 -5 -5.54 7.87
 11 5 -5 -5.54 7.87
 9 -5 -5 -2.85 6.70
 -9 -5 5 1.68 1.47
 -9 5 5 -2.85 -6.70
 9 5 -5 1.68 -1.47
 9 5 -5 1.68 -1.47
 -7 -5 5 -2.52 -1.73
 7 -5 -5 2.39 7.70
 7 -5 -5 2.39 7.70
 7 5 -5 -2.52 1.73
 -7 5 5 2.39 -7.70
 7 5 -5 -2.52 1.73
 -5 -5 5 20.61 -1.25
 5 -5 -5 -21.25 1.56
 -5 5 5 -21.25 -1.56
 5 5 -5 20.61 1.25
 5 5 -5 20.61 1.25
 -3 -5 5 17.92 -2.88
 3 -5 -5 -17.70 0.76
 -3 -5 5 17.92 -2.88
 3 5 -5 17.92 2.88
 -3 5 5 -17.70 -0.76
 3 5 -5 17.92 2.88
 1 -5 -5 -20.46 -11.02
 1 -5 -5 -20.46 -11.02
 -1 5 5 -20.46 11.02
 1 5 -5 20.58 1.10
 -1 -5 -5 -4.95 2.59
 -1 -5 -5 -4.95 2.59
 1 5 5 -4.95 -2.59
 -1 5 -5 3.80 -4.24
 -3 -5 -5 -15.81 -2.39
 -3 -5 -5 -15.81 -2.39
 3 5 5 -15.81 2.39
 -3 5 -5 15.78 -2.61
 -3 5 -5 15.78 -2.61
 5 -5 5 -3.00 7.13
 -5 -5 -5 2.85 8.05
 -5 -5 -5 2.85 8.05
 -5 5 -5 -3.00 -7.13
 5 5 5 2.85 -8.05
 -7 -5 -5 1.49 1.46
 -7 -5 -5 1.49 1.46
 7 -5 5 -2.85 -0.77
 -7 5 -5 -2.85 0.77
 7 5 5 1.49 -1.46
 -9 -5 -5 -5.39 5.68
 9 -5 5 4.86 2.26
 -9 -5 -5 -5.39 5.68
 9 5 5 -5.39 -5.68
 11 -5 5 3.92 -0.89
 -11 -5 -5 -4.77 -1.19
 -11 -5 -5 -4.77 -1.19
 11 5 5 -4.77 1.19
 13 -5 5 5.65 -0.03
 -13 -5 -5 -4.95 0.04
 -13 -5 -5 -4.95 0.04
 13 5 5 -4.95 -0.04
 -15 -5 -5 1.77 -1.92
 15 -5 5 -0.98 -5.46
 15 5 5 1.77 1.92
 -17 -5 -5 1.62 2.69
 17 5 5 1.62 -2.69
 19 5 5 -2.63 2.91
 21 5 5 -4.16 2.15
 23 5 5 -6.79 3.48
 -25 -5 -5 -3.78 -6.12
 25 5 5 -3.78 6.12
 -30 -6 5 4.58 -1.61
 30 -6 -5 -5.65 0.75
 30 -6 -5 -5.65 0.75
 30 6 -5 4.58 1.61
 30 6 -5 4.58 1.61
 -28 -6 5 -0.24 2.16
 28 -6 -5 -0.57 -1.33
 28 -6 -5 -0.57 -1.33
 28 6 -5 -0.24 -2.16
 28 6 -5 -0.24 -2.16
 26 -6 -5 1.13 -3.41
 26 -6 -5 1.13 -3.41
 -26 -6 5 -1.41 0.95
 26 6 -5 -1.41 -0.95
 26 6 -5 -1.41 -0.95
 24 -6 -5 1.50 2.31
 24 -6 -5 1.50 2.31
 -24 -6 5 -1.78 -0.12
 24 6 -5 -1.78 0.12
 24 6 -5 -1.78 0.12
 -22 -6 5 1.19 4.52
 22 -6 -5 -1.46 -0.30
 22 -6 -5 -1.46 -0.30
 22 6 -5 1.19 -4.52
 -22 6 5 -1.46 0.30
 22 6 -5 1.19 -4.52
 -20 -6 5 4.22 4.89
 20 -6 -5 -3.23 -1.03
 20 -6 -5 -3.23 -1.03
 20 6 -5 4.22 -4.89
 -20 6 5 -3.23 1.03
 20 6 -5 4.22 -4.89
 -18 -6 5 0.66 2.45
 18 -6 -5 0.97 1.59
 18 -6 -5 0.97 1.59
 -18 6 5 0.97 -1.59
 18 6 -5 0.66 -2.45
 18 6 -5 0.66 -2.45
 16 -6 -5 7.79 -0.30
 -16 -6 5 -6.28 2.71
 16 -6 -5 7.79 -0.30
 16 6 -5 -6.28 -2.71
 -16 6 5 7.79 0.30
 16 6 -5 -6.28 -2.71
 -14 -6 5 -1.49 1.68
 14 -6 -5 1.95 1.61
 14 -6 -5 1.95 1.61
 14 6 -5 -1.49 -1.68
 -14 6 5 1.95 -1.61
 14 6 -5 -1.49 -1.68
 -12 -6 5 12.94 7.44
 12 -6 -5 -13.29 2.03
 12 -6 -5 -13.29 2.03
 12 6 -5 12.94 -7.44
 -12 6 5 -13.29 -2.03
 12 6 -5 12.94 -7.44
 10 -6 -5 -19.20 2.90
 -10 -6 5 19.12 1.67
 10 -6 -5 -19.20 2.90
 -10 6 5 -19.20 -2.90
 10 6 -5 19.12 -1.67
 10 6 -5 19.12 -1.67
 8 -6 -5 -14.67 -2.63
 -8 -6 5 15.68 5.82
 8 6 -5 15.68 -5.82
 -8 6 5 -14.67 2.63
 8 6 -5 15.68 -5.82
 6 -6 -5 -8.03 -5.95
 6 -6 -5 -8.03 -5.95
 -6 -6 5 8.28 0.13
 6 6 -5 8.28 -0.13
 -6 6 5 -8.03 5.95
 6 6 -5 8.28 -0.13
 -4 -6 5 -2.89 0.39
 -4 -6 5 -2.89 0.39
 4 -6 -5 2.84 -5.65
 4 -6 -5 2.84 -5.65
 -4 6 5 2.84 5.65
 4 6 -5 -2.89 -0.39
 2 -6 -5 -1.75 1.07
 2 -6 -5 -1.75 1.07
 -2 -6 5 0.87 -1.03
 -2 6 5 -1.75 -1.07
 2 6 -5 0.87 1.03
 0 -6 5 6.83 -1.97
 0 -6 -5 -7.21 -0.48
 0 -6 -5 -7.21 -0.48
 0 6 5 -7.21 0.48
 2 -6 5 -4.65 2.36
 -2 -6 -5 5.82 3.46
 -2 -6 -5 5.82 3.46
 2 6 5 5.82 -3.46
 -2 6 -5 -4.65 -2.36
 4 -6 5 -11.14 -2.73
 -4 -6 -5 10.80 1.14
 -4 -6 -5 10.80 1.14
 4 6 5 10.80 -1.14
 -4 6 -5 -11.14 2.73
 -4 6 -5 -11.14 2.73
 -6 -6 -5 2.58 0.30
 6 -6 5 -2.24 1.95
 -6 -6 -5 2.58 0.30
 -6 6 -5 -2.24 -1.95
 6 6 5 2.58 -0.30
 8 -6 5 0.63 5.06
 -8 -6 -5 -0.79 6.49
 -8 -6 -5 -0.79 6.49
 -8 6 -5 0.63 -5.06
 8 6 5 -0.79 -6.49
 -10 -6 -5 1.02 1.00
 -10 -6 -5 1.02 1.00
 10 -6 5 -0.64 4.89
 -10 6 -5 -0.64 -4.89
 10 6 5 1.02 -1.00
 12 -6 5 -7.67 -3.28
 -12 -6 -5 8.68 -0.19
 -12 -6 -5 8.68 -0.19
 12 6 5 8.68 0.19
 -14 -6 -5 6.03 4.16
 -14 -6 -5 6.03 4.16
 14 -6 5 -6.41 1.81
 14 6 5 6.03 -4.16
 16 -6 5 -2.11 -0.20
 -16 -6 -5 1.27 -2.71
 -16 -6 -5 1.27 -2.71
 16 6 5 1.27 2.71
 -18 -6 -5 1.56 -0.16
 18 6 5 1.56 0.16
 -20 -6 -5 3.42 3.15
 20 6 5 3.42 -3.15
 -22 -6 -5 2.74 1.66
 22 6 5 2.74 -1.66
 -24 -6 -5 4.12 4.52
 24 6 5 4.12 -4.52
 -29 -7 5 -0.51 1.56
 29 -7 -5 1.01 -0.83
 29 -7 -5 1.01 -0.83
 29 7 -5 -0.51 -1.56
 -27 -7 5 2.57 -0.20
 27 -7 -5 -1.22 1.48
 27 -7 -5 -1.22 1.48
 27 7 -5 2.57 0.20
 27 7 -5 2.57 0.20
 25 -7 -5 -2.68 1.24
 25 -7 -5 -2.68 1.24
 -25 -7 5 2.91 -1.25
 25 7 -5 2.91 1.25
 25 7 -5 2.91 1.25
 -23 -7 5 4.78 -4.97
 23 -7 -5 -3.90 3.93
 23 -7 -5 -3.90 3.93
 23 7 -5 4.78 4.97
 23 7 -5 4.78 4.97
 21 -7 -5 -0.39 3.22
 21 -7 -5 -0.39 3.22
 -21 -7 5 0.64 -5.86
 21 7 -5 0.64 5.86
 21 7 -5 0.64 5.86
 -21 7 5 -0.39 -3.22
 -19 -7 5 -1.92 -2.53
 19 -7 -5 0.58 1.25
 19 -7 -5 0.58 1.25
 -19 7 5 0.58 -1.25
 19 7 -5 -1.92 2.53
 19 7 -5 -1.92 2.53
 17 -7 -5 -1.04 -1.30
 -17 -7 5 -0.75 -3.61
 17 -7 -5 -1.04 -1.30
 17 7 -5 -0.75 3.61
 -17 7 5 -1.04 1.30
 17 7 -5 -0.75 3.61
 15 -7 -5 -1.42 -3.94
 -15 -7 5 1.14 4.87
 15 -7 -5 -1.42 -3.94
 15 7 -5 1.14 -4.87
 -15 7 5 -1.42 3.94
 15 7 -5 1.14 -4.87
 -13 -7 5 1.60 -1.79
 13 -7 -5 -1.83 -0.19
 13 -7 -5 -1.83 -0.19
 13 7 -5 1.60 1.79
 -13 7 5 -1.83 0.19
 13 7 -5 1.60 1.79
 11 -7 -5 -3.52 1.97
 -11 -7 5 3.72 2.80
 11 -7 -5 -3.52 1.97
 -11 7 5 -3.52 -1.97
 11 7 -5 3.72 -2.80
 9 -7 -5 -6.28 -1.43
 -9 -7 5 5.41 -2.52
 -9 7 5 -6.28 1.43
 9 7 -5 5.41 2.52
 9 7 -5 5.41 2.52
 -7 -7 5 7.90 -0.25
 7 -7 -5 -8.56 -1.32
 7 -7 -5 -8.56 -1.32
 -7 7 5 -8.56 1.32
 7 7 -5 7.90 0.25
 5 -7 -5 0.52 4.85
 5 -7 -5 0.52 4.85
 -5 -7 5 -0.03 -2.14
 5 7 -5 -0.03 2.14
 -5 7 5 0.52 -4.85
 3 -7 -5 -2.50 -0.43
 3 -7 -5 -2.50 -0.43
 -3 -7 5 3.83 1.59
 -3 7 5 -2.50 0.43
 3 7 -5 3.83 -1.59
 1 -7 -5 12.02 -4.05
 1 -7 -5 12.02 -4.05
 -1 -7 5 -10.27 -5.92
 1 7 -5 -10.27 5.92
 -1 7 5 12.02 4.05
 -1 -7 -5 -7.43 -10.31
 1 -7 5 6.58 -11.63
 -1 -7 -5 -7.43 -10.31
 -1 7 -5 6.58 11.63
 1 7 5 -7.43 10.31
 3 -7 5 19.48 -1.00
 -3 -7 -5 -19.57 -3.08
 -3 -7 -5 -19.57 -3.08
 3 7 5 -19.57 3.08
 -3 7 -5 19.48 1.00
 -5 -7 -5 -13.58 -5.05
 -5 -7 -5 -13.58 -5.05
 5 -7 5 13.42 0.69
 -5 7 -5 13.42 -0.69
 5 7 5 -13.58 5.05
 7 -7 5 -3.61 -1.49
 -7 -7 -5 3.38 -3.46
 -7 -7 -5 3.38 -3.46
 7 7 5 3.38 3.46
 -7 7 -5 -3.61 1.49
 -9 -7 -5 12.19 -8.16
 -9 -7 -5 12.19 -8.16
 9 -7 5 -12.04 -5.92
 9 7 5 12.19 8.16
 -9 7 -5 -12.04 5.92
 -11 -7 -5 0.52 6.58
 -11 -7 -5 0.52 6.58
 11 -7 5 -1.40 6.63
 -11 7 -5 -1.40 -6.63
 11 7 5 0.52 -6.58
 -13 -7 -5 -6.98 -6.26
 13 -7 5 6.61 2.07
 -13 -7 -5 -6.98 -6.26
 13 7 5 -6.98 6.26
 -13 7 -5 6.61 -2.07
 -15 -7 -5 -8.73 -0.94
 -15 -7 -5 -8.73 -0.94
 15 -7 5 9.07 -0.04
 -15 7 -5 9.07 0.04
 15 7 5 -8.73 0.94
 -17 -7 -5 -3.20 1.54
 -17 -7 -5 -3.20 1.54
 17 7 5 -3.20 -1.54
 -17 7 -5 3.40 -0.90
 -19 -7 -5 -1.57 1.77
 -19 7 -5 2.01 3.90
 19 7 5 -1.57 -1.77
 -21 -7 -5 -2.76 -4.18
 21 7 5 -2.76 4.18
 -21 7 -5 0.47 2.26
 -23 -7 -5 -3.71 -4.77
 23 7 5 -3.71 4.77
 -23 7 -5 1.29 -4.04
 28 -8 -5 1.73 -1.11
 -28 -8 5 -2.21 -1.17
 28 -8 -5 1.73 -1.11
 28 8 -5 -2.21 1.17
 26 -8 -5 2.02 -0.34
 -26 -8 5 -2.96 -0.26
 26 -8 -5 2.02 -0.34
 26 8 -5 -2.96 0.26
 24 -8 -5 1.09 -5.34
 24 -8 -5 1.09 -5.34
 -24 -8 5 -1.44 4.84
 24 8 -5 -1.44 -4.84
 22 -8 -5 0.49 -6.28
 22 -8 -5 0.49 -6.28
 -22 -8 5 -1.15 6.08
 22 8 -5 -1.15 -6.08
 22 8 -5 -1.15 -6.08
 20 -8 -5 -2.19 -5.10
 -20 -8 5 3.04 4.80
 20 -8 -5 -2.19 -5.10
 20 8 -5 3.04 -4.80
 20 8 -5 3.04 -4.80
 -20 8 5 -2.19 5.10
 -18 -8 5 4.01 5.19
 18 -8 -5 -3.62 -5.79
 18 -8 -5 -3.62 -5.79
 18 8 -5 4.01 -5.19
 18 8 -5 4.01 -5.19
 -18 8 5 -3.62 5.79
 -16 -8 5 6.53 1.80
 16 -8 -5 -5.78 -2.25
 16 -8 -5 -5.78 -2.25
 16 8 -5 6.53 -1.80
 16 8 -5 6.53 -1.80
 -16 8 5 -5.78 2.25
 14 -8 -5 -1.69 -0.03
 14 -8 -5 -1.69 -0.03
 -14 -8 5 1.61 3.59
 14 8 -5 1.61 -3.59
 -14 8 5 -1.69 0.03
 14 8 -5 1.61 -3.59
 12 -8 -5 1.78 -1.75
 12 8 -5 -1.15 -3.21
 -12 8 5 1.78 1.75
 10 -8 -5 8.63 -0.49
 -10 -8 5 -8.28 1.53
 10 -8 -5 8.63 -0.49
 -10 8 5 8.63 0.49
 10 8 -5 -8.28 -1.53
 -8 -8 5 -1.83 0.54
 8 -8 -5 2.82 -3.72
 8 -8 -5 2.82 -3.72
 -8 8 5 2.82 3.72
 8 8 -5 -1.83 -0.54
 6 -8 -5 1.60 -3.97
 6 -8 -5 1.60 -3.97
 -6 -8 5 -2.56 -2.78
 -6 8 5 1.60 3.97
 6 8 -5 -2.56 2.78
 4 -8 -5 1.93 -5.44
 4 -8 -5 1.93 -5.44
 -4 -8 5 -2.15 0.89
 -4 8 5 1.93 5.44
 4 8 -5 -2.15 -0.89
 2 -8 -5 -6.43 3.15
 2 -8 -5 -6.43 3.15
 -2 -8 5 4.87 3.55
 2 8 -5 4.87 -3.55
 -2 8 5 -6.43 -3.15
 0 -8 5 7.91 14.30
 0 -8 -5 -8.63 15.49
 0 -8 -5 -8.63 15.49
 0 8 -5 7.91 -14.30
 0 8 5 -8.63 -15.49
 2 -8 5 -6.39 3.63
 -2 -8 -5 6.31 0.93
 -2 -8 -5 6.31 0.93
 2 8 5 6.31 -0.93
 -2 8 -5 -6.39 -3.63
 -4 -8 -5 13.55 -10.12
 -4 -8 -5 13.55 -10.12
 4 -8 5 -14.76 -10.79
 -4 8 -5 -14.76 10.79
 4 8 5 13.55 10.12
 -6 -8 -5 -1.54 -6.80
 -6 -8 -5 -1.54 -6.80
 6 -8 5 1.81 -3.97
 6 8 5 -1.54 6.80
 -6 8 -5 1.81 3.97
 -8 -8 -5 -9.58 -1.77
 -8 -8 -5 -9.58 -1.77
 8 -8 5 9.26 2.11
 8 8 5 -9.58 1.77
 -8 8 -5 9.26 -2.11
 10 -8 5 14.81 -2.12
 -10 -8 -5 -14.69 -2.93
 -10 -8 -5 -14.69 -2.93
 -10 8 -5 14.81 2.12
 10 8 5 -14.69 2.93
 -12 -8 -5 -6.89 0.76
 12 -8 5 7.17 -1.63
 -12 -8 -5 -6.89 0.76
 -12 8 -5 7.17 1.63
 12 8 5 -6.89 -0.76
 -14 -8 -5 5.04 6.74
 14 -8 5 -4.43 -3.60
 -14 -8 -5 5.04 6.74
 14 8 5 5.04 -6.74
 -14 8 -5 -4.43 3.60
 -16 -8 -5 6.39 -1.13
 -16 -8 -5 6.39 -1.13
 -16 8 -5 -5.67 -0.32
 16 8 5 6.39 1.13
 -18 -8 -5 4.01 -8.07
 -18 -8 -5 4.01 -8.07
 -18 8 -5 -3.89 -7.15
 18 8 5 4.01 8.07
 -20 -8 -5 2.69 -5.83
 -20 8 -5 -1.77 -7.99
 20 8 5 2.69 5.83
 -22 -8 -5 4.82 1.48
 -22 8 -5 -2.63 -3.19
 22 8 5 4.82 -1.48
 -27 -9 5 -1.78 2.43
 27 -9 -5 1.15 0.02
 27 9 -5 -1.78 -2.43
 25 -9 -5 -0.66 -1.15
 25 -9 -5 -0.66 -1.15
 -25 -9 5 1.44 2.78
 25 9 -5 1.44 -2.78
 -23 -9 5 -1.76 1.76
 23 -9 -5 2.10 3.92
 23 -9 -5 2.10 3.92
 23 9 -5 -1.76 -1.76
 21 -9 -5 -1.35 1.08
 21 -9 -5 -1.35 1.08
 -21 -9 5 1.42 1.48
 21 9 -5 1.42 -1.48
 19 -9 -5 0.09 4.04
 19 -9 -5 0.09 4.04
 -19 -9 5 -0.26 -1.73
 19 9 -5 -0.26 1.73
 -19 9 5 0.09 -4.04
 17 -9 -5 0.59 2.21
 17 -9 -5 0.59 2.21
 -17 -9 5 0.57 -0.99
 -17 9 5 0.59 -2.21
 17 9 -5 0.57 0.99
 15 -9 -5 2.38 3.64
 -15 -9 5 -1.83 0.95
 15 -9 -5 2.38 3.64
 15 9 -5 -1.83 -0.95
 -15 9 5 2.38 -3.64
 13 -9 -5 -0.14 -0.98
 -13 -9 5 1.00 -1.93
 13 -9 -5 -0.14 -0.98
 -13 9 5 -0.14 0.98
 13 9 -5 1.00 1.93
 11 -9 -5 -2.40 -0.43
 11 -9 -5 -2.40 -0.43
 -11 -9 5 2.09 -0.39
 11 9 -5 2.09 0.39
 9 -9 -5 0.85 4.27
 9 9 -5 -2.11 5.29
 -9 9 5 0.85 -4.27
 7 -9 -5 4.07 5.61
 -7 -9 5 -4.68 -1.55
 -7 -9 5 -4.68 -1.55
 7 -9 -5 4.07 5.61
 7 9 -5 -4.68 1.55
 -7 9 5 4.07 -5.61
 -5 -9 5 3.72 0.03
 5 -9 -5 -4.23 0.72
 -5 -9 5 3.72 0.03
 5 -9 -5 -4.23 0.72
 -5 9 5 -4.23 -0.72
 3 -9 -5 0.99 1.69
 3 -9 -5 0.99 1.69
 -3 -9 5 -1.51 -1.50
 -3 9 5 0.99 -1.69
 3 9 -5 -1.51 1.50
 -1 -9 5 -2.21 -8.34
 1 -9 -5 3.33 -8.49
 1 -9 -5 3.33 -8.49
 -1 9 5 3.33 8.49
 1 9 -5 -2.21 8.34
 -1 -9 -5 1.68 -5.32
 1 -9 5 -1.20 -7.36
 -1 -9 -5 1.68 -5.32
 -1 9 -5 -1.20 7.36
 1 9 5 1.68 5.32
 3 -9 5 7.97 0.32
 -3 -9 -5 -7.36 1.65
 -3 -9 -5 -7.36 1.65
 -3 9 -5 7.97 -0.32
 3 9 5 -7.36 -1.65
 -5 -9 -5 -6.91 4.27
 -5 -9 -5 -6.91 4.27
 5 -9 5 6.93 1.38
 -5 9 -5 6.93 -1.38
 5 9 5 -6.91 -4.27
 -7 -9 -5 -3.12 -4.84
 7 -9 5 2.80 -4.33
 -7 -9 -5 -3.12 -4.84
 7 9 5 -3.12 4.84
 -7 9 -5 2.80 4.33
 9 -9 5 0.08 -2.43
 -9 -9 -5 -0.53 -0.51
 -9 -9 -5 -0.53 -0.51
 9 9 5 -0.53 0.51
 -9 9 -5 0.08 2.43
 -11 -9 -5 6.82 -0.85
 -11 -9 -5 6.82 -0.85
 11 -9 5 -6.80 -1.46
 -11 9 -5 -6.80 1.46
 11 9 5 6.82 0.85
 -13 -9 -5 1.62 -7.38
 13 -9 5 -3.14 5.32
 -13 -9 -5 1.62 -7.38
 13 9 5 1.62 7.38
 -13 9 -5 -3.14 -5.32
 -15 -9 -5 0.09 -11.05
 15 -9 5 -1.21 10.76
 -15 -9 -5 0.09 -11.05
 15 9 5 0.09 11.05
 -15 9 -5 -1.21 -10.76
 -17 -9 -5 -2.51 2.44
 -17 -9 -5 -2.51 2.44
 17 9 5 -2.51 -2.44
 -17 9 -5 2.14 1.80
 -19 -9 -5 -2.14 6.30
 -19 9 -5 2.38 5.28
 19 9 5 -2.14 -6.30
 -21 -9 -5 -1.03 5.45
 -21 9 -5 -0.01 7.41
 21 9 5 -1.03 -5.45
 -26 -10 5 -1.08 -4.24
 26 -10 -5 0.20 1.57
 26 10 -5 -1.08 4.24
 -24 -10 5 -0.77 -3.05
 24 -10 -5 -0.11 -0.33
 24 10 -5 -0.77 3.05
 -22 -10 5 -2.39 -5.67
 22 -10 -5 1.99 -1.15
 22 10 -5 -2.39 5.67
 -20 -10 5 -0.64 1.72
 20 -10 -5 1.37 1.50
 20 10 -5 -0.64 -1.72
 -18 -10 5 1.48 2.61
 18 -10 -5 -0.47 -0.92
 18 -10 -5 -0.47 -0.92
 18 10 -5 1.48 -2.61
 -18 10 5 -0.47 0.92
 16 -10 -5 0.13 -0.97
 -16 -10 5 -0.85 1.42
 16 -10 -5 0.13 -0.97
 16 10 -5 -0.85 -1.42
 -16 10 5 0.13 0.97
 -14 -10 5 0.92 -6.11
 14 -10 -5 -1.48 -4.95
 14 -10 -5 -1.48 -4.95
 -14 10 5 -1.48 4.95
 14 10 -5 0.92 6.11
 12 -10 -5 -0.62 1.11
 -12 -10 5 -0.37 -3.04
 12 -10 -5 -0.62 1.11
 -12 10 5 -0.62 -1.11
 12 10 -5 -0.37 3.04
 -10 -10 5 -1.17 -2.30
 -10 -10 5 -1.17 -2.30
 10 -10 -5 1.49 -4.16
 10 -10 -5 1.49 -4.16
 -10 10 5 1.49 4.16
 10 10 -5 -1.17 2.30
 -8 -10 5 4.64 1.36
 8 -10 -5 -4.21 -6.07
 8 -10 -5 -4.21 -6.07
 -8 10 5 -4.21 6.07
 8 10 -5 4.64 -1.36
 6 -10 -5 1.64 -0.02
 -6 -10 5 -1.61 0.17
 6 -10 -5 1.64 -0.02
 -6 10 5 1.64 0.02
 6 10 -5 -1.61 -0.17
 4 -10 -5 0.40 0.03
 -4 -10 5 -0.16 -4.69
 4 -10 -5 0.40 0.03
 4 10 -5 -0.16 4.69
 -4 10 5 0.40 -0.03
 2 -10 -5 -1.50 5.18
 -2 -10 5 1.72 0.05
 2 -10 -5 -1.50 5.18
 2 10 -5 1.72 -0.05
 -2 10 5 -1.50 -5.18
 0 -10 -5 -1.21 -0.58
 0 -10 -5 -1.21 -0.58
 0 -10 5 0.51 1.28
 0 10 -5 0.51 -1.28
 0 10 5 -1.21 0.58
 -2 -10 -5 0.81 4.55
 2 -10 5 -0.83 0.70
 -2 -10 -5 0.81 4.55
 2 10 5 0.81 -4.55
 -2 10 -5 -0.83 -0.70
 -4 -10 -5 2.47 4.89
 -4 -10 -5 2.47 4.89
 4 -10 5 -3.63 8.54
 -4 10 -5 -3.63 -8.54
 4 10 5 2.47 -4.89
 6 -10 5 -3.79 5.75
 -6 -10 -5 4.09 5.48
 -6 -10 -5 4.09 5.48
 6 10 5 4.09 -5.48
 -6 10 -5 -3.79 -5.75
 -8 -10 -5 8.38 4.85
 -8 -10 -5 8.38 4.85
 8 -10 5 -8.80 5.44
 -8 10 -5 -8.80 -5.44
 8 10 5 8.38 -4.85
 -10 -10 -5 6.20 -5.07
 10 -10 5 -6.17 6.05
 -10 -10 -5 6.20 -5.07
 -10 10 -5 -6.17 -6.05
 10 10 5 6.20 5.07
 12 -10 5 -2.41 1.96
 -12 -10 -5 2.60 -4.08
 -12 -10 -5 2.60 -4.08
 -12 10 -5 -2.41 -1.96
 12 10 5 2.60 4.08
 -14 -10 -5 -2.90 6.32
 14 -10 5 4.02 -3.82
 -14 -10 -5 -2.90 6.32
 14 10 5 -2.90 -6.32
 -14 10 -5 4.02 3.82
 -16 -10 -5 -1.18 4.34
 -16 -10 -5 -1.18 4.34
 -16 10 -5 1.51 1.85
 16 10 5 -1.18 -4.34
 -18 -10 -5 -1.10 -2.90
 -18 10 -5 0.91 -4.01
 18 10 5 -1.10 2.90
 -20 -10 -5 -0.45 -5.78
 20 10 5 -0.45 5.78
 -20 10 -5 0.30 -6.95
 -25 -11 5 0.19 0.79
 25 -11 -5 -0.16 0.52
 25 11 -5 0.19 -0.79
 23 -11 -5 -0.43 -0.52
 -23 -11 5 1.06 2.47
 23 11 -5 1.06 -2.47
 21 -11 -5 -1.11 -1.77
 -21 -11 5 1.78 1.93
 21 11 -5 1.78 -1.93
 19 -11 -5 5.75 -4.01
 -19 -11 5 -6.01 -5.21
 19 11 -5 -6.01 5.21
 17 -11 -5 4.49 1.40
 -17 -11 5 -3.92 -2.66
 -17 11 5 4.49 -1.40
 17 11 -5 -3.92 2.66
 -15 -11 5 -4.99 -4.56
 15 -11 -5 5.73 -0.32
 -15 11 5 5.73 0.32
 15 11 -5 -4.99 4.56
 13 -11 -5 5.65 1.68
 -13 -11 5 -5.06 1.97
 13 11 -5 -5.06 -1.97
 -13 11 5 5.65 -1.68
 11 -11 -5 3.09 -6.01
 -11 -11 5 -3.15 -3.56
 11 -11 -5 3.09 -6.01
 -11 11 5 3.09 6.01
 11 11 -5 -3.15 3.56
 9 -11 -5 1.58 1.27
 9 -11 -5 1.58 1.27
 -9 -11 5 -1.97 -3.07
 9 11 -5 -1.97 3.07
 -9 11 5 1.58 -1.27
 -7 -11 5 -1.36 -2.28
 7 -11 -5 1.40 -2.66
 7 -11 -5 1.40 -2.66
 -7 11 5 1.40 2.66
 7 11 -5 -1.36 2.28
 5 -11 -5 0.35 1.85
 5 -11 -5 0.35 1.85
 -5 -11 5 0.05 1.57
 -5 11 5 0.35 -1.85
 5 11 -5 0.05 -1.57
 3 -11 -5 -1.31 -3.00
 3 -11 -5 -1.31 -3.00
 -3 -11 5 -0.02 1.89
 3 11 -5 -0.02 -1.89
 -3 11 5 -1.31 3.00
 -1 -11 5 -2.05 0.23
 1 -11 -5 1.29 -3.08
 1 -11 -5 1.29 -3.08
 1 11 -5 -2.05 -0.23
 -1 11 5 1.29 3.08
 -1 -11 -5 2.16 -0.11
 1 -11 5 -2.78 2.41
 -1 -11 -5 2.16 -0.11
 1 11 5 2.16 0.11
 -1 11 -5 -2.78 -2.41
 3 -11 5 -1.86 -1.19
 -3 -11 -5 2.56 -3.61
 -3 -11 -5 2.56 -3.61
 3 11 5 2.56 3.61
 -3 11 -5 -1.86 1.19
 5 -11 5 -1.39 -5.71
 -5 -11 -5 2.20 -4.69
 -5 -11 -5 2.20 -4.69
 -5 11 -5 -1.39 5.71
 5 11 5 2.20 4.69
 -7 -11 -5 -2.91 -3.10
 -7 -11 -5 -2.91 -3.10
 7 -11 5 1.49 -1.77
 7 11 5 -2.91 3.10
 -7 11 -5 1.49 1.77
 -9 -11 -5 -4.67 -2.27
 -9 -11 -5 -4.67 -2.27
 9 -11 5 3.75 -3.49
 9 11 5 -4.67 2.27
 -9 11 -5 3.75 3.49
 -11 -11 -5 -2.20 3.60
 -11 -11 -5 -2.20 3.60
 11 -11 5 0.74 -4.97
 -11 11 -5 0.74 4.97
 11 11 5 -2.20 -3.60
 -13 -11 -5 0.85 3.37
 -13 -11 -5 0.85 3.37
 13 -11 5 -0.93 -1.91
 13 11 5 0.85 -3.37
 -13 11 -5 -0.93 1.91
 -15 -11 -5 1.96 -3.50
 -15 -11 -5 1.96 -3.50
 15 11 5 1.96 3.50
 -15 11 -5 -2.39 0.11
 -17 -11 -5 1.81 -3.80
 -17 -11 -5 1.81 -3.80
 17 11 5 1.81 3.80
 -17 11 -5 -0.86 -1.39
 -19 -11 -5 2.61 4.00
 19 11 5 2.61 -4.00
 -19 11 -5 -2.21 4.34
 24 -12 -5 -0.53 0.53
 -24 -12 5 0.84 -1.86
 24 12 -5 0.84 1.86
 22 -12 -5 -0.38 1.05
 -22 -12 5 -0.05 -4.22
 22 12 -5 -0.05 4.22
 20 -12 -5 -0.50 2.98
 -20 -12 5 0.39 -0.60
 20 12 -5 0.39 0.60
 -18 -12 5 0.64 -1.89
 18 -12 -5 -0.38 0.96
 18 12 -5 0.64 1.89
 16 -12 -5 -2.03 -1.01
 -16 -12 5 1.98 -1.37
 16 12 -5 1.98 1.37
 -16 12 5 -2.03 1.01
 14 -12 -5 -2.36 -2.11
 -14 -12 5 2.98 -0.48
 -14 12 5 -2.36 2.11
 14 12 -5 2.98 0.48
 12 -12 -5 -3.77 -1.40
 -12 -12 5 3.72 -3.91
 -12 12 5 -3.77 1.40
 12 12 -5 3.72 3.91
 -10 -12 5 4.04 2.35
 10 -12 -5 -3.02 0.62
 -10 12 5 -3.02 -0.62
 10 12 -5 4.04 -2.35
 -8 -12 5 -2.30 4.76
 8 -12 -5 2.72 0.05
 -8 12 5 2.72 -0.05
 8 12 -5 -2.30 -4.76
 -6 -12 5 0.86 -1.97
 6 -12 -5 -0.88 -1.22
 -6 12 5 -0.88 1.22
 6 12 -5 0.86 1.97
 4 -12 -5 -0.60 -3.16
 -4 -12 5 1.57 -0.31
 4 -12 -5 -0.60 -3.16
 -4 12 5 -0.60 3.16
 4 12 -5 1.57 0.31
 2 -12 -5 -0.56 0.06
 2 -12 -5 -0.56 0.06
 -2 -12 5 1.47 -3.29
 2 12 -5 1.47 3.29
 -2 12 5 -0.56 -0.06
 0 -12 -5 -0.45 0.71
 0 -12 -5 -0.45 0.71
 0 -12 5 1.37 -1.62
 0 12 5 -0.45 -0.71
 0 12 -5 1.37 1.62
 -2 -12 -5 -2.40 -0.52
 -2 -12 -5 -2.40 -0.52
 2 -12 5 2.29 -3.71
 -2 12 -5 2.29 3.71
 2 12 5 -2.40 0.52
 4 -12 5 1.74 -1.15
 -4 -12 -5 -2.50 4.31
 -4 -12 -5 -2.50 4.31
 4 12 5 -2.50 -4.31
 -4 12 -5 1.74 1.15
 6 -12 5 -2.27 -1.67
 -6 -12 -5 1.09 2.12
 -6 -12 -5 1.09 2.12
 6 12 5 1.09 -2.12
 -6 12 -5 -2.27 1.67
 -8 -12 -5 2.06 3.34
 8 -12 5 -0.19 -4.40
 -8 -12 -5 2.06 3.34
 -8 12 -5 -0.19 4.40
 8 12 5 2.06 -3.34
 -10 -12 -5 -2.23 1.84
 10 -12 5 2.17 -2.05
 -10 -12 -5 -2.23 1.84
 -10 12 -5 2.17 2.05
 10 12 5 -2.23 -1.84
 12 -12 5 3.70 1.24
 -12 -12 -5 -3.08 -4.68
 -12 -12 -5 -3.08 -4.68
 12 12 5 -3.08 4.68
 -12 12 -5 3.70 -1.24
 -14 -12 -5 1.00 -2.67
 -14 -12 -5 1.00 -2.67
 14 -12 5 -1.23 -0.50
 -14 12 -5 -1.23 0.50
 14 12 5 1.00 2.67
 -16 -12 -5 -1.82 6.97
 -16 -12 -5 -1.82 6.97
 16 12 5 -1.82 -6.97
 -16 12 -5 0.78 3.91
 -18 -12 -5 -0.07 0.83
 -18 12 -5 -1.12 0.83
 18 12 5 -0.07 -0.83
 23 -13 -5 1.67 0.73
 -23 -13 5 -3.03 0.54
 23 13 -5 -3.03 -0.54
 21 -13 -5 4.36 1.16
 -21 -13 5 -4.95 0.81
 21 13 -5 -4.95 -0.81
 -19 -13 5 -1.26 3.23
 19 -13 -5 -0.29 2.83
 19 13 -5 -1.26 -3.23
 17 -13 -5 0.80 1.40
 -17 -13 5 -1.27 2.40
 17 13 -5 -1.27 -2.40
 15 -13 -5 -3.41 4.84
 -15 -13 5 3.21 3.30
 -15 13 5 -3.41 -4.84
 15 13 -5 3.21 -3.30
 -13 -13 5 -0.94 2.25
 13 -13 -5 1.78 4.51
 -13 13 5 1.78 -4.51
 13 13 -5 -0.94 -2.25
 -11 -13 5 1.83 4.32
 11 -13 -5 -1.18 3.95
 11 13 -5 1.83 -4.32
 -11 13 5 -1.18 -3.95
 -9 -13 5 2.50 -0.30
 9 -13 -5 -2.93 -0.57
 9 13 -5 2.50 0.30
 -9 13 5 -2.93 0.57
 7 -13 -5 -4.70 0.90
 -7 -13 5 4.15 -1.57
 7 13 -5 4.15 1.57
 -7 13 5 -4.70 -0.90
 5 -13 -5 0.07 -2.04
 -5 -13 5 -0.83 1.92
 5 13 -5 -0.83 -1.92
 -5 13 5 0.07 2.04
 -3 -13 5 -1.11 1.44
 3 -13 -5 0.60 1.72
 -3 13 5 0.60 -1.72
 3 13 -5 -1.11 -1.44
 1 -13 -5 -2.05 0.00
 -1 -13 5 1.57 2.06
 1 13 -5 1.57 -2.06
 -1 13 5 -2.05 0.00
 -1 -13 -5 -0.20 2.17
 1 -13 5 0.57 2.49
 -1 13 -5 0.57 -2.49
 1 13 5 -0.20 -2.17
 -3 -13 -5 0.44 -1.47
 3 -13 5 0.19 0.35
 3 13 5 0.44 1.47
 -3 13 -5 0.19 -0.35
 5 -13 5 2.78 -0.92
 -5 -13 -5 -0.49 0.32
 -5 -13 -5 -0.49 0.32
 5 13 5 -0.49 -0.32
 -5 13 -5 2.78 0.92
 -7 -13 -5 -2.78 -1.44
 7 -13 5 2.94 -1.08
 -7 -13 -5 -2.78 -1.44
 7 13 5 -2.78 1.44
 -7 13 -5 2.94 1.08
 -9 -13 -5 0.06 -0.94
 -9 -13 -5 0.06 -0.94
 9 -13 5 0.99 5.32
 -9 13 -5 0.99 -5.32
 9 13 5 0.06 0.94
 -11 -13 -5 4.72 3.35
 11 -13 5 -4.20 -1.36
 -11 -13 -5 4.72 3.35
 11 13 5 4.72 -3.35
 -11 13 -5 -4.20 1.36
 13 -13 5 -2.02 0.30
 -13 -13 -5 2.15 3.17
 -13 -13 -5 2.15 3.17
 13 13 5 2.15 -3.17
 -13 13 -5 -2.02 -0.30
 -15 -13 -5 0.20 -1.12
 -15 -13 -5 0.20 -1.12
 15 13 5 0.20 1.12
 -15 13 -5 -0.03 -0.17
 -20 -14 5 2.73 -6.40
 20 -14 -5 -2.09 -1.66
 20 14 -5 2.73 6.40
 -18 -14 5 1.06 -2.94
 18 -14 -5 -0.16 -0.35
 18 14 -5 1.06 2.94
 -16 -14 5 -3.20 -5.46
 16 -14 -5 3.03 0.47
 16 14 -5 -3.20 5.46
 14 -14 -5 3.29 -0.80
 -14 -14 5 -3.50 2.24
 14 14 -5 -3.50 -2.24
 -14 14 5 3.29 0.80
 -12 -14 5 -2.90 -1.00
 12 -14 -5 1.52 -1.24
 12 14 -5 -2.90 1.00
 -12 14 5 1.52 1.24
 -10 -14 5 -3.20 -2.12
 10 -14 -5 3.45 2.46
 -10 14 5 3.45 -2.46
 10 14 -5 -3.20 2.12
 -8 -14 5 0.76 -3.01
 8 -14 -5 0.12 -0.10
 -8 14 5 0.12 0.10
 8 14 -5 0.76 3.01
 6 -14 -5 1.33 3.00
 -6 -14 5 -0.13 0.07
 6 14 -5 -0.13 -0.07
 -6 14 5 1.33 -3.00
 -4 -14 5 0.95 -2.52
 4 -14 -5 -1.01 2.41
 4 14 -5 0.95 2.52
 -4 14 5 -1.01 -2.41
 -2 -14 5 -2.46 1.84
 2 -14 -5 2.17 1.63
 -2 14 5 2.17 -1.63
 2 14 -5 -2.46 -1.84
 0 -14 -5 0.16 0.38
 0 -14 5 -1.34 -1.55
 0 14 -5 -1.34 1.55
 0 14 5 0.16 -0.38
 2 -14 5 -1.21 -4.79
 -2 -14 -5 -0.18 -3.40
 -2 14 -5 -1.21 4.79
 2 14 5 -0.18 3.40
 -4 -14 -5 0.33 -3.44
 4 -14 5 -2.55 -3.54
 -4 14 -5 -2.55 3.54
 4 14 5 0.33 3.44
 6 -14 5 -1.86 2.85
 -6 -14 -5 1.65 -2.00
 -6 14 -5 -1.86 -2.85
 6 14 5 1.65 2.00
 8 -14 5 -2.60 -3.88
 -8 -14 -5 2.13 -1.31
 8 14 5 2.13 1.31
 -8 14 -5 -2.60 3.88
 10 -14 5 3.18 0.14
 -10 -14 -5 -2.91 -1.07
 10 14 5 -2.91 1.07
 -10 14 -5 3.18 -0.14
 -12 -14 -5 -3.44 0.90
 12 -14 5 3.13 0.48
 -12 14 -5 3.13 -0.48
 12 14 5 -3.44 -0.90
 -14 -14 -5 -1.29 2.19
 -14 14 -5 1.19 -0.42
 14 14 5 -1.29 -2.19
 17 -15 -5 -1.42 0.02
 -17 -15 5 1.24 4.86
 17 15 -5 1.24 -4.86
 -15 -15 5 1.03 1.98
 15 -15 -5 -0.65 -2.61
 15 15 -5 1.03 -1.98
 13 -15 -5 -2.34 0.26
 -13 -15 5 3.44 -1.09
 13 15 -5 3.44 1.09
 11 -15 -5 0.74 -2.33
 -11 -15 5 1.19 3.07
 -11 15 5 0.74 2.33
 11 15 -5 1.19 -3.07
 -9 -15 5 -0.82 4.14
 9 -15 -5 1.36 0.40
 -9 15 5 1.36 -0.40
 9 15 -5 -0.82 -4.14
 7 -15 -5 -0.49 -1.34
 -7 -15 5 0.86 1.08
 -7 15 5 -0.49 1.34
 7 15 -5 0.86 -1.08
 5 -15 -5 -2.19 3.27
 -5 -15 5 2.03 2.91
 -5 15 5 -2.19 -3.27
 5 15 -5 2.03 -2.91
 3 -15 -5 -2.45 -0.03
 -3 -15 5 3.19 -2.33
 -3 15 5 -2.45 0.03
 3 15 -5 3.19 2.33
 -1 -15 5 4.62 -3.08
 1 -15 -5 -3.62 -0.62
 1 15 -5 4.62 3.08
 -1 15 5 -3.62 0.62
 -1 -15 -5 -1.39 1.53
 1 -15 5 1.63 1.19
 -1 15 -5 1.63 -1.19
 1 15 5 -1.39 -1.53
 3 -15 5 2.31 7.25
 -3 -15 -5 -1.86 4.18
 -3 15 -5 2.31 -7.25
 3 15 5 -1.86 -4.18
 -5 -15 -5 -1.83 -0.48
 5 -15 5 2.62 0.21
 -5 15 -5 2.62 -0.21
 5 15 5 -1.83 0.48
 -7 -15 -5 -2.29 4.03
 7 -15 5 2.00 3.50
 7 15 5 -2.29 -4.03
 -7 15 -5 2.00 -3.50
 9 -15 5 -1.70 0.84
 -9 -15 -5 1.30 3.48
 9 15 5 1.30 -3.48
 -9 15 -5 -1.70 -0.84
 11 -15 5 -4.41 1.27
 -11 -15 -5 4.46 0.10
 -11 15 -5 -4.41 -1.27
 11 15 5 4.46 -0.10
 -14 -16 5 0.58 1.30
 14 -16 -5 -0.73 1.68
 14 16 -5 0.58 -1.30
 -12 -16 5 0.41 1.66
 12 -16 -5 -0.42 2.64
 12 16 -5 0.41 -1.66
 10 -16 -5 -3.31 0.21
 -10 -16 5 3.09 -1.44
 10 16 -5 3.09 1.44
 -10 16 5 -3.31 -0.21
 -8 -16 5 -0.83 -0.19
 8 -16 -5 1.41 1.21
 8 16 -5 -0.83 0.19
 -8 16 5 1.41 -1.21
 -6 -16 5 -0.98 -2.57
 6 -16 -5 1.48 -2.10
 -6 16 5 1.48 2.10
 6 16 -5 -0.98 2.57
 4 -16 -5 1.93 -5.99
 -4 -16 5 -1.06 -4.53
 -4 16 5 1.93 5.99
 4 16 -5 -1.06 4.53
 -2 -16 5 -2.20 -0.42
 2 -16 -5 1.21 0.21
 -2 16 5 1.21 -0.21
 2 16 -5 -2.20 0.42
 0 -16 5 0.08 -2.07
 0 -16 -5 -0.52 -0.40
 0 16 -5 0.08 2.07
 0 16 5 -0.52 0.40
 -2 -16 -5 -1.21 -1.00
 2 -16 5 1.36 -2.06
 2 16 5 -1.21 1.00
 -2 16 -5 1.36 2.06
 4 -16 5 -0.88 -0.91
 -4 -16 -5 0.69 0.39
 4 16 5 0.69 -0.39
 -4 16 -5 -0.88 0.91
 6 -16 5 0.84 -0.73
 -6 -16 -5 -1.22 -0.57
 -6 16 -5 0.84 0.73
 6 16 5 -1.22 0.57
 8 -16 5 0.38 2.54
 -8 -16 -5 0.49 -4.27
 8 16 5 0.49 4.27
 -8 16 -5 0.38 -2.54
 9 -17 -5 0.13 1.75
 7 -17 -5 -3.52 2.54
 -7 -17 5 3.29 3.25
 -7 17 5 -3.52 -2.54
 7 17 -5 3.29 -3.25
 -5 -17 5 1.44 3.88
 5 -17 -5 -2.21 2.70
 -5 17 5 -2.21 -2.70
 5 17 -5 1.44 -3.88
 -3 -17 5 4.17 3.37
 3 -17 -5 -4.39 3.00
 3 17 -5 4.17 -3.37
 -3 17 5 -4.39 -3.00
 -1 -17 5 0.88 3.20
 1 -17 -5 -0.46 -2.91
 -1 17 5 -0.46 2.91
 1 17 -5 0.88 -3.20
 1 -17 5 -0.29 0.95
 -1 -17 -5 0.82 -1.35
 -1 17 -5 -0.29 -0.95
 1 17 5 0.82 1.35
 32 0 -6 1.19 -0.16
 30 0 -6 -2.86 3.49
 28 0 -6 -0.18 2.19
 26 0 -6 1.84 -1.59
 24 0 -6 2.59 2.25
 24 0 -6 2.59 2.25
 22 0 -6 -8.00 0.22
 22 0 -6 -8.00 0.22
 20 0 -6 -11.78 4.48
 18 0 -6 0.09 -1.54
 18 0 -6 0.09 -1.54
 8 0 -6 -57.88 -8.73
 8 0 -6 -57.88 -8.73
 8 0 -6 -57.88 -8.73
 6 0 -6 -61.12 4.17
 6 0 -6 -61.12 4.17
 6 0 -6 -61.12 4.17
 4 0 -6 91.17 5.05
 4 0 -6 91.17 5.05
 2 0 -6 -42.74 -2.75
 -2 0 6 -42.74 2.75
 0 0 -6 29.65 2.84
 -2 0 -6 32.97 -4.11
 -4 0 -6 4.13 -2.22
 -6 0 -6 -24.34 4.11
 -6 0 -6 -24.34 4.11
 -6 0 -6 -24.34 4.11
 33 -1 -6 1.00 -0.63
 33 1 -6 1.89 -0.17
 31 -1 -6 -0.32 -2.70
 31 1 -6 0.23 -0.79
 29 -1 -6 -0.16 -2.80
 29 1 -6 0.20 -2.37
 27 -1 -6 -0.44 1.65
 27 1 -6 -0.74 -2.05
 27 1 -6 -0.74 -2.05
 25 -1 -6 -3.29 1.19
 25 1 -6 -3.81 -0.84
 25 1 -6 -3.81 -0.84
 23 -1 -6 1.40 -4.18
 23 1 -6 1.35 0.10
 23 1 -6 1.35 0.10
 21 -1 -6 4.80 -1.44
 21 1 -6 4.86 -1.87
 21 1 -6 4.86 -1.87
 19 1 -6 -4.82 1.88
 19 1 -6 -4.82 1.88
 17 -1 -6 -12.88 8.33
 17 -1 -6 -12.88 8.33
 17 1 -6 -12.08 0.93
 17 1 -6 -12.08 0.93
 15 -1 -6 -19.16 3.90
 15 -1 -6 -19.16 3.90
 15 -1 -6 -19.16 3.90
 15 1 -6 -19.23 1.51
 15 1 -6 -19.23 1.51
 13 -1 -6 -8.46 3.58
 13 -1 -6 -8.46 3.58
 13 -1 -6 -8.46 3.58
 13 1 -6 -8.43 0.42
 13 1 -6 -8.43 0.42
 11 -1 -6 10.10 -3.96
 11 -1 -6 10.10 -3.96
 11 1 -6 9.38 -5.65
 11 1 -6 9.38 -5.65
 9 -1 -6 28.84 5.45
 9 -1 -6 28.84 5.45
 9 1 -6 28.51 2.70
 9 1 -6 28.51 2.70
 7 -1 -6 22.19 7.14
 7 1 -6 21.82 3.15
 7 1 -6 21.82 3.15
 5 -1 -6 -57.94 -0.56
 5 1 -6 -59.77 -0.67
 5 1 -6 -59.77 -0.67
 3 -1 -6 -54.93 -10.60
 3 -1 -6 -54.93 -10.60
 -3 1 6 -54.93 10.60
 3 1 -6 -54.70 -10.64
 1 -1 -6 6.50 -7.22
 -1 -1 6 6.90 5.07
 1 -1 -6 6.50 -7.22
 1 1 -6 6.90 -5.07
 -1 1 6 6.50 7.22
 -1 1 6 6.50 7.22
 -1 -1 -6 -15.72 -9.77
 -1 -1 -6 -15.72 -9.77
 1 1 6 -15.72 9.77
 1 1 6 -15.72 9.77
 -1 1 -6 -15.95 -9.67
 -3 -1 -6 -7.19 4.13
 -3 -1 -6 -7.19 4.13
 -3 1 -6 -7.66 -0.17
 3 1 6 -7.19 -4.13
 -5 -1 -6 5.79 0.08
 -5 -1 -6 5.79 0.08
 -5 1 -6 6.21 -2.38
 -5 1 -6 6.21 -2.38
 5 1 6 5.79 -0.08
 -7 -1 -6 10.01 2.39
 -7 -1 -6 10.01 2.39
 -9 -1 -6 -0.01 -3.11
 -11 -1 -6 -8.66 -2.22
 11 1 6 -8.66 2.22
 -13 -1 -6 -5.93 1.12
 13 1 6 -5.93 -1.12
 -15 -1 -6 -1.03 0.70
 15 1 6 -1.03 -0.70
 32 -2 -6 -2.67 2.25
 32 2 -6 -3.40 -0.42
 30 -2 -6 1.14 1.85
 30 2 -6 1.05 -3.23
 28 -2 -6 -2.28 -2.47
 28 2 -6 -1.51 1.75
 28 2 -6 -1.51 1.75
 26 -2 -6 0.11 -8.62
 26 2 -6 1.41 6.40
 26 2 -6 1.41 6.40
 24 -2 -6 0.60 0.37
 24 2 -6 1.09 -1.76
 24 2 -6 1.09 -1.76
 22 -2 -6 1.52 2.70
 22 -2 -6 1.52 2.70
 22 2 -6 1.41 0.20
 22 2 -6 1.41 0.20
 20 -2 -6 6.69 0.21
 20 -2 -6 6.69 0.21
 20 2 -6 6.52 -6.08
 20 2 -6 6.52 -6.08
 18 -2 -6 5.83 -0.98
 18 -2 -6 5.83 -0.98
 18 2 -6 5.72 -3.79
 18 2 -6 5.72 -3.79
 16 -2 -6 4.19 0.61
 16 -2 -6 4.19 0.61
 16 2 -6 4.39 -3.57
 16 2 -6 4.39 -3.57
 14 -2 -6 -4.49 -2.08
 14 -2 -6 -4.49 -2.08
 14 2 -6 -4.06 -4.66
 12 -2 -6 -6.82 -0.74
 12 -2 -6 -6.82 -0.74
 12 2 -6 -5.52 -3.26
 12 2 -6 -5.52 -3.26
 10 -2 -6 -24.07 1.20
 10 2 -6 -23.90 0.83
 -10 2 6 -24.07 -1.20
 10 2 -6 -23.90 0.83
 8 -2 -6 -44.66 -5.40
 8 2 -6 -44.37 0.34
 8 2 -6 -44.37 0.34
 6 -2 -6 25.82 -16.84
 6 -2 -6 25.82 -16.84
 6 2 -6 27.92 -15.00
 6 2 -6 27.92 -15.00
 -6 2 6 25.82 16.84
 4 -2 -6 -17.16 -12.05
 -4 -2 6 -17.76 0.46
 4 -2 -6 -17.16 -12.05
 4 2 -6 -17.76 -0.46
 4 2 -6 -17.76 -0.46
 -4 2 6 -17.16 12.05
 2 -2 -6 15.34 -1.48
 -2 -2 6 14.82 2.02
 2 -2 -6 15.34 -1.48
 2 2 -6 14.82 -2.02
 2 2 -6 14.82 -2.02
 -2 2 6 15.34 1.48
 0 -2 6 -49.90 3.85
 0 -2 -6 -48.93 -3.23
 0 2 -6 -49.90 -3.85
 0 2 -6 -49.90 -3.85
 0 2 6 -48.93 3.23
 -2 -2 -6 -19.61 -0.40
 2 -2 6 -19.76 0.70
 -2 2 -6 -19.76 -0.70
 2 2 6 -19.61 0.40
 -2 2 -6 -19.76 -0.70
 4 -2 6 -6.63 1.97
 -4 -2 -6 -6.78 -1.24
 -4 2 -6 -6.63 -1.97
 4 2 6 -6.78 1.24
 6 -2 6 1.30 3.52
 -6 -2 -6 1.78 -0.14
 -6 -2 -6 1.78 -0.14
 6 2 6 1.78 0.14
 -8 -2 -6 5.99 3.76
 8 -2 6 5.70 1.00
 -8 -2 -6 5.99 3.76
 8 2 6 5.99 -3.76
 -12 -2 -6 1.44 -2.95
 12 2 6 1.44 2.95
 -14 -2 -6 0.40 -2.60
 14 2 6 0.40 2.60
 16 2 6 -3.55 0.87
 18 2 6 0.71 4.80
 -33 -3 6 0.98 -3.08
 33 -3 -6 -0.13 -5.56
 33 3 -6 0.98 3.08
 31 -3 -6 -0.56 -4.90
 -31 -3 6 -0.29 -5.55
 31 3 -6 -0.29 5.55
 29 -3 -6 0.71 -6.42
 29 3 -6 -0.11 8.64
 29 3 -6 -0.11 8.64
 27 -3 -6 -0.17 2.38
 27 3 -6 -2.31 -1.88
 27 3 -6 -2.31 -1.88
 25 -3 -6 -2.32 2.81
 25 -3 -6 -2.32 2.81
 25 3 -6 -2.28 -1.64
 25 3 -6 -2.28 -1.64
 23 -3 -6 -7.72 1.85
 23 -3 -6 -7.72 1.85
 23 3 -6 -6.88 1.84
 23 3 -6 -6.88 1.84
 21 -3 -6 -8.72 -1.97
 21 -3 -6 -8.72 -1.97
 21 3 -6 -7.21 6.41
 21 3 -6 -7.21 6.41
 19 -3 -6 0.14 3.23
 19 -3 -6 0.14 3.23
 19 3 -6 0.85 1.31
 19 3 -6 0.85 1.31
 17 -3 -6 9.65 -5.67
 17 -3 -6 9.65 -5.67
 17 3 -6 10.21 3.27
 17 3 -6 10.21 3.27
 15 -3 -6 15.47 -1.22
 15 -3 -6 15.47 -1.22
 15 3 -6 15.82 4.16
 15 3 -6 15.82 4.16
 13 -3 -6 3.25 6.45
 13 -3 -6 3.25 6.45
 13 3 -6 2.42 11.08
 13 3 -6 2.42 11.08
 -13 3 6 3.25 -6.45
 11 -3 -6 -8.41 6.57
 11 3 -6 -8.86 9.31
 -11 3 6 -8.41 -6.57
 9 -3 -6 20.19 -10.66
 -9 -3 6 19.78 6.21
 9 -3 -6 20.19 -10.66
 9 3 -6 19.78 -6.21
 9 3 -6 19.78 -6.21
 -9 3 6 20.19 10.66
 7 -3 -6 9.22 8.18
 7 3 -6 6.52 15.53
 7 3 -6 6.52 15.53
 -7 3 6 9.22 -8.18
 5 -3 -6 28.32 6.32
 -5 -3 6 27.25 -7.43
 5 3 -6 27.25 7.43
 -5 3 6 28.32 -6.32
 5 3 -6 27.25 7.43
 3 -3 -6 38.74 11.70
 3 -3 -6 38.74 11.70
 -3 -3 6 38.73 -10.79
 3 3 -6 38.73 10.79
 3 3 -6 38.73 10.79
 -3 3 6 38.74 -11.70
 -1 -3 6 15.04 -3.99
 1 -3 -6 15.60 0.95
 -1 3 6 15.60 -0.95
 1 3 -6 15.04 3.99
 -1 -3 -6 30.82 5.73
 -1 -3 -6 30.82 5.73
 1 -3 6 31.05 -6.45
 -1 3 -6 31.05 6.45
 1 3 6 30.82 -5.73
 -3 -3 -6 2.14 -4.17
 -3 -3 -6 2.14 -4.17
 3 -3 6 1.72 1.67
 3 3 6 2.14 4.17
 -3 3 -6 1.72 -1.67
 -5 -3 -6 -3.15 -10.32
 5 -3 6 -3.80 4.32
 -5 -3 -6 -3.15 -10.32
 -5 3 -6 -3.80 -4.32
 5 3 6 -3.15 10.32
 7 -3 6 -6.13 0.13
 -7 -3 -6 -6.62 -6.29
 7 3 6 -6.62 6.29
 9 -3 6 0.07 2.82
 -9 -3 -6 -0.43 0.93
 -9 -3 -6 -0.43 0.93
 9 3 6 -0.43 -0.93
 -11 -3 -6 5.78 5.79
 -11 -3 -6 5.78 5.79
 13 -3 6 0.60 -6.07
 -13 -3 -6 1.10 5.33
 13 3 6 1.10 -5.33
 -15 -3 -6 0.04 1.69
 15 3 6 0.04 -1.69
 17 3 6 -0.05 -2.74
 19 3 6 -3.34 -1.71
 21 3 6 -3.69 0.51
 32 -4 -6 4.59 5.69
 -32 -4 6 4.44 3.84
 32 4 -6 4.44 -3.84
 30 -4 -6 4.68 5.50
 -30 -4 6 5.33 6.04
 30 4 -6 5.33 -6.04
 30 4 -6 5.33 -6.04
 28 -4 -6 2.33 6.98
 -28 -4 6 4.72 8.17
 28 4 -6 4.72 -8.17
 28 4 -6 4.72 -8.17
 26 -4 -6 2.61 1.60
 26 -4 -6 2.61 1.60
 -26 -4 6 2.75 -0.81
 26 4 -6 2.75 0.81
 26 4 -6 2.75 0.81
 -24 -4 6 2.83 2.60
 24 -4 -6 3.44 -1.85
 24 -4 -6 3.44 -1.85
 24 4 -6 2.83 -2.60
 24 4 -6 2.83 -2.60
 22 -4 -6 6.84 5.03
 22 -4 -6 6.84 5.03
 -22 -4 6 5.46 7.14
 22 4 -6 5.46 -7.14
 22 4 -6 5.46 -7.14
 20 -4 -6 1.68 2.82
 20 -4 -6 1.68 2.82
 -20 -4 6 2.38 1.41
 20 4 -6 2.38 -1.41
 20 4 -6 2.38 -1.41
 18 -4 -6 -5.37 1.01
 -18 -4 6 -4.89 -0.83
 18 -4 -6 -5.37 1.01
 18 4 -6 -4.89 0.83
 18 4 -6 -4.89 0.83
 -16 -4 6 -12.43 2.13
 16 -4 -6 -13.64 4.93
 16 -4 -6 -13.64 4.93
 16 4 -6 -12.43 -2.13
 -16 4 6 -13.64 -4.93
 16 4 -6 -12.43 -2.13
 14 -4 -6 -0.09 -3.11
 -14 -4 6 -0.09 6.24
 14 -4 -6 -0.09 -3.11
 14 4 -6 -0.09 -6.24
 -14 4 6 -0.09 3.11
 14 4 -6 -0.09 -6.24
 12 -4 -6 19.78 -14.15
 12 -4 -6 19.78 -14.15
 -12 -4 6 19.88 14.65
 12 4 -6 19.88 -14.65
 -12 4 6 19.78 14.15
 12 4 -6 19.88 -14.65
 10 -4 -6 18.53 1.24
 -10 -4 6 19.16 2.65
 -10 4 6 18.53 -1.24
 10 4 -6 19.16 -2.65
 10 4 -6 19.16 -2.65
 -8 -4 6 29.64 8.85
 8 -4 -6 28.60 0.50
 8 -4 -6 28.60 0.50
 8 4 -6 29.64 -8.85
 -8 4 6 28.60 -0.50
 8 4 -6 29.64 -8.85
 6 -4 -6 13.19 -5.93
 -6 -4 6 14.03 7.73
 6 -4 -6 13.19 -5.93
 -6 4 6 13.19 5.93
 6 4 -6 14.03 -7.73
 6 4 -6 14.03 -7.73
 -4 -4 6 22.72 1.07
 4 -4 -6 23.82 3.08
 4 -4 -6 23.82 3.08
 4 4 -6 22.72 -1.07
 -4 4 6 23.82 -3.08
 4 4 -6 22.72 -1.07
 2 -4 -6 2.94 6.49
 -2 -4 6 2.68 -6.77
 -2 -4 6 2.68 -6.77
 2 -4 -6 2.94 6.49
 2 4 -6 2.68 6.77
 2 4 -6 2.68 6.77
 -2 4 6 2.94 -6.49
 0 -4 6 14.94 -7.37
 0 -4 -6 15.31 10.40
 0 -4 -6 15.31 10.40
 0 4 -6 14.94 7.37
 0 4 6 15.31 -10.40
 0 4 -6 14.94 7.37
 2 -4 6 -10.45 6.29
 -2 -4 -6 -10.63 -6.24
 -2 -4 -6 -10.63 -6.24
 -2 4 -6 -10.45 -6.29
 2 4 6 -10.63 6.24
 -2 4 -6 -10.45 -6.29
 4 -4 6 2.02 -1.62
 -4 -4 -6 2.03 5.36
 -4 -4 -6 2.03 5.36
 -4 4 -6 2.02 1.62
 4 4 6 2.03 -5.36
 6 -4 6 6.91 4.01
 -6 -4 -6 7.51 -0.59
 -6 -4 -6 7.51 -0.59
 6 4 6 7.51 0.59
 8 -4 6 4.65 4.94
 -8 -4 -6 5.47 -2.92
 -8 -4 -6 5.47 -2.92
 8 4 6 5.47 2.92
 -10 -4 -6 -0.62 -2.57
 10 -4 6 -1.57 -1.48
 -10 -4 -6 -0.62 -2.57
 10 4 6 -0.62 2.57
 -12 -4 -6 -8.31 -1.09
 -12 -4 -6 -8.31 -1.09
 12 -4 6 -8.32 2.91
 12 4 6 -8.31 1.09
 -14 -4 -6 -1.35 0.18
 14 -4 6 -1.53 6.63
 -14 -4 -6 -1.35 0.18
 14 4 6 -1.35 -0.18
 16 4 6 3.21 -1.96
 18 4 6 3.03 0.08
 20 4 6 2.43 -1.81
 -22 -4 -6 2.80 0.72
 22 4 6 2.80 -0.72
 -24 -4 -6 1.15 -0.54
 24 4 6 1.15 0.54
 31 -5 -6 -4.71 -1.73
 -31 -5 6 -5.45 -0.42
 31 5 -6 -5.45 0.42
 31 5 -6 -5.45 0.42
 29 -5 -6 -2.84 -2.31
 29 -5 -6 -2.84 -2.31
 -29 -5 6 -4.49 -2.41
 29 5 -6 -4.49 2.41
 29 5 -6 -4.49 2.41
 -27 -5 6 2.62 -0.83
 27 -5 -6 3.41 -2.14
 27 -5 -6 3.41 -2.14
 27 5 -6 2.62 0.83
 27 5 -6 2.62 0.83
 -25 -5 6 4.73 -0.02
 25 -5 -6 5.23 3.57
 25 -5 -6 5.23 3.57
 25 5 -6 4.73 0.02
 25 5 -6 4.73 0.02
 23 -5 -6 2.91 -1.44
 -23 -5 6 3.79 -5.72
 23 -5 -6 2.91 -1.44
 23 5 -6 3.79 5.72
 23 5 -6 3.79 5.72
 21 -5 -6 2.84 -3.66
 -21 -5 6 2.47 -0.44
 21 -5 -6 2.84 -3.66
 21 5 -6 2.47 0.44
 -21 5 6 2.84 3.66
 21 5 -6 2.47 0.44
 19 -5 -6 3.78 -0.13
 19 -5 -6 3.78 -0.13
 -19 -5 6 3.45 3.61
 19 5 -6 3.45 -3.61
 -19 5 6 3.78 0.13
 19 5 -6 3.45 -3.61
 17 -5 -6 10.28 -1.67
 -17 -5 6 8.65 0.19
 17 -5 -6 10.28 -1.67
 17 5 -6 8.65 -0.19
 17 5 -6 8.65 -0.19
 -17 5 6 10.28 1.67
 15 -5 -6 10.97 -1.24
 -15 -5 6 11.15 2.36
 15 -5 -6 10.97 -1.24
 15 5 -6 11.15 -2.36
 15 5 -6 11.15 -2.36
 -15 5 6 10.97 1.24
 13 -5 -6 4.84 3.40
 13 -5 -6 4.84 3.40
 13 5 -6 5.01 5.55
 13 5 -6 5.01 5.55
 -13 5 6 4.84 -3.40
 -11 -5 6 7.12 3.57
 11 -5 -6 7.45 1.61
 -11 5 6 7.45 -1.61
 11 5 -6 7.12 -3.57
 11 5 -6 7.12 -3.57
 -9 -5 6 0.11 -2.51
 9 -5 -6 1.64 -0.87
 9 -5 -6 1.64 -0.87
 9 5 -6 0.11 2.51
 9 5 -6 0.11 2.51
 -9 5 6 1.64 0.87
 7 -5 -6 -0.82 1.71
 7 -5 -6 -0.82 1.71
 -7 -5 6 -1.86 -3.70
 -7 5 6 -0.82 -1.71
 7 5 -6 -1.86 3.70
 7 5 -6 -1.86 3.70
 -5 -5 6 -20.43 -9.31
 5 -5 -6 -20.91 6.77
 5 -5 -6 -20.91 6.77
 -5 5 6 -20.91 -6.77
 5 5 -6 -20.43 9.31
 5 5 -6 -20.43 9.31
 -3 -5 6 -25.43 0.20
 -3 -5 6 -25.43 0.20
 3 -5 -6 -25.87 0.77
 3 -5 -6 -25.87 0.77
 3 5 -6 -25.43 -0.20
 3 5 -6 -25.43 -0.20
 -3 5 6 -25.87 -0.77
 1 -5 -6 -19.22 -0.10
 -1 -5 6 -18.70 2.16
 1 -5 -6 -19.22 -0.10
 1 5 -6 -18.70 -2.16
 -1 5 6 -19.22 0.10
 -1 -5 -6 -7.64 13.10
 -1 -5 -6 -7.64 13.10
 1 5 6 -7.64 -13.10
 -1 5 -6 -7.69 9.89
 -1 5 -6 -7.69 9.89
 -1 5 -6 -7.69 9.89
 -3 -5 -6 13.63 8.71
 -3 -5 -6 13.63 8.71
 3 5 6 13.63 -8.71
 -3 5 -6 13.63 7.46
 -5 -5 -6 4.37 3.51
 -5 -5 -6 4.37 3.51
 -5 5 -6 5.07 2.59
 -5 5 -6 5.07 2.59
 5 5 6 4.37 -3.51
 -7 -5 -6 -4.70 5.62
 7 -5 6 -4.20 -3.21
 -7 -5 -6 -4.70 5.62
 7 5 6 -4.70 -5.62
 9 -5 6 -8.55 0.11
 -9 -5 -6 -8.83 0.75
 -9 -5 -6 -8.83 0.75
 9 5 6 -8.83 -0.75
 11 -5 6 1.74 4.09
 -11 -5 -6 1.32 -2.65
 -11 -5 -6 1.32 -2.65
 11 5 6 1.32 2.65
 -13 -5 -6 5.45 2.31
 -13 -5 -6 5.45 2.31
 13 -5 6 5.67 -4.66
 13 5 6 5.45 -2.31
 -15 -5 -6 2.67 -1.90
 -15 -5 -6 2.67 -1.90
 15 5 6 2.67 1.90
 -17 -5 -6 -2.09 2.28
 17 5 6 -2.09 -2.28
 -19 -5 -6 -1.77 1.84
 19 5 6 -1.77 -1.84
 -21 -5 -6 -2.62 1.55
 21 5 6 -2.62 -1.55
 -23 -5 -6 -2.00 -0.29
 23 5 6 -2.00 0.29
 -30 -6 6 0.86 -0.02
 30 -6 -6 0.59 2.67
 30 -6 -6 0.59 2.67
 30 6 -6 0.86 0.02
 30 6 -6 0.86 0.02
 28 -6 -6 -1.12 0.46
 -28 -6 6 -1.63 -2.91
 28 -6 -6 -1.12 0.46
 28 6 -6 -1.63 2.91
 28 6 -6 -1.63 2.91
 26 -6 -6 -6.75 -3.78
 26 -6 -6 -6.75 -3.78
 -26 -6 6 -5.66 -1.68
 26 6 -6 -5.66 1.68
 26 6 -6 -5.66 1.68
 24 -6 -6 -0.90 -2.45
 24 -6 -6 -0.90 -2.45
 -24 -6 6 -0.65 1.61
 24 6 -6 -0.65 -1.61
 24 6 -6 -0.65 -1.61
 22 -6 -6 1.26 -0.59
 22 -6 -6 1.26 -0.59
 -22 -6 6 1.34 2.85
 22 6 -6 1.34 -2.85
 22 6 -6 1.34 -2.85
 20 -6 -6 1.89 1.84
 -20 -6 6 2.01 -0.23
 20 -6 -6 1.89 1.84
 20 6 -6 2.01 0.23
 20 6 -6 2.01 0.23
 -20 6 6 1.89 -1.84
 -18 -6 6 1.37 6.59
 18 -6 -6 0.23 2.27
 18 -6 -6 0.23 2.27
 -18 6 6 0.23 -2.27
 18 6 -6 1.37 -6.59
 18 6 -6 1.37 -6.59
 16 -6 -6 1.82 1.26
 16 -6 -6 1.82 1.26
 -16 -6 6 2.15 3.02
 -16 6 6 1.82 -1.26
 16 6 -6 2.15 -3.02
 16 6 -6 2.15 -3.02
 14 -6 -6 2.04 1.13
 14 -6 -6 2.04 1.13
 -14 -6 6 2.13 7.63
 14 6 -6 2.13 -7.63
 -14 6 6 2.04 -1.13
 14 6 -6 2.13 -7.63
 12 -6 -6 -0.14 2.09
 -12 6 6 -0.14 -2.09
 12 6 -6 -0.08 1.01
 12 6 -6 -0.08 1.01
 -10 -6 6 2.15 -4.14
 10 -6 -6 2.33 0.87
 10 -6 -6 2.33 0.87
 10 6 -6 2.15 4.14
 10 6 -6 2.15 4.14
 -10 6 6 2.33 -0.87
 8 -6 -6 -9.25 2.96
 8 -6 -6 -9.25 2.96
 -8 -6 6 -8.44 -5.09
 -8 6 6 -9.25 -2.96
 8 6 -6 -8.44 5.09
 8 6 -6 -8.44 5.09
 6 -6 -6 4.84 5.05
 -6 -6 6 4.81 4.43
 6 -6 -6 4.84 5.05
 6 6 -6 4.81 -4.43
 -6 6 6 4.84 -5.05
 6 6 -6 4.81 -4.43
 4 -6 -6 6.40 -1.14
 4 -6 -6 6.40 -1.14
 -4 -6 6 6.33 -0.20
 -4 -6 6 6.33 -0.20
 4 6 -6 6.33 0.20
 -4 6 6 6.40 1.14
 4 6 -6 6.33 0.20
 2 -6 -6 20.40 -0.88
 -2 -6 6 20.59 -0.12
 2 -6 -6 20.40 -0.88
 -2 6 6 20.40 0.88
 2 6 -6 20.59 0.12
 0 -6 -6 16.76 -10.71
 0 -6 6 16.75 4.48
 0 -6 -6 16.76 -10.71
 0 6 -6 16.75 -4.48
 0 6 6 16.76 10.71
 -2 -6 -6 11.11 -0.41
 2 -6 6 11.01 1.26
 -2 -6 -6 11.11 -0.41
 2 6 6 11.11 0.41
 -2 6 -6 11.01 -1.26
 -2 6 -6 11.01 -1.26
 -2 6 -6 11.01 -1.26
 -4 -6 -6 -8.41 4.35
 -4 -6 -6 -8.41 4.35
 4 -6 6 -8.48 -1.72
 -4 6 -6 -8.48 1.72
 -4 6 -6 -8.48 1.72
 4 6 6 -8.41 -4.35
 6 -6 6 -5.76 -5.14
 -6 -6 -6 -4.90 8.88
 -6 -6 -6 -4.90 8.88
 6 6 6 -4.90 -8.88
 -6 6 -6 -5.76 5.14
 -8 -6 -6 7.69 -0.80
 -8 -6 -6 7.69 -0.80
 8 -6 6 7.15 0.54
 8 6 6 7.69 0.80
 -8 6 -6 7.15 -0.54
 -10 -6 -6 10.90 6.94
 10 -6 6 10.11 -6.86
 -10 -6 -6 10.90 6.94
 10 6 6 10.90 -6.94
 -10 6 -6 10.11 6.86
 -12 -6 -6 7.71 -3.10
 -12 -6 -6 7.71 -3.10
 12 -6 6 8.01 1.40
 12 6 6 7.71 3.10
 -14 -6 -6 -1.59 2.00
 -14 -6 -6 -1.59 2.00
 14 -6 6 -1.32 -2.21
 14 6 6 -1.59 -2.00
 -16 -6 -6 -2.60 0.10
 -16 -6 -6 -2.60 0.10
 16 6 6 -2.60 -0.10
 -18 -6 -6 -0.10 2.95
 18 6 6 -0.10 -2.95
 -20 -6 -6 0.55 0.11
 20 6 6 0.55 -0.11
 -22 -6 -6 3.43 2.27
 22 6 6 3.43 -2.27
 24 6 6 4.52 -6.27
 31 -7 -6 -0.77 -1.51
 31 -7 -6 -0.77 -1.51
 -31 -7 6 -0.36 -1.52
 31 7 -6 -0.36 1.52
 29 -7 -6 -0.68 -0.02
 -29 -7 6 -1.37 0.40
 29 -7 -6 -0.68 -0.02
 29 7 -6 -1.37 -0.40
 29 7 -6 -1.37 -0.40
 -27 -7 6 1.40 5.78
 27 -7 -6 1.90 5.78
 27 -7 -6 1.90 5.78
 27 7 -6 1.40 -5.78
 27 7 -6 1.40 -5.78
 -25 -7 6 -0.82 4.38
 25 -7 -6 0.13 4.18
 25 -7 -6 0.13 4.18
 25 7 -6 -0.82 -4.38
 25 7 -6 -0.82 -4.38
 23 -7 -6 -1.93 0.94
 23 -7 -6 -1.93 0.94
 -23 -7 6 -1.67 1.70
 23 7 -6 -1.67 -1.70
 23 7 -6 -1.67 -1.70
 -21 -7 6 -0.56 0.14
 21 -7 -6 -0.88 -2.30
 21 -7 -6 -0.88 -2.30
 21 7 -6 -0.56 -0.14
 21 7 -6 -0.56 -0.14
 19 -7 -6 0.57 -2.65
 19 -7 -6 0.57 -2.65
 -19 -7 6 1.16 -2.96
 19 7 -6 1.16 2.96
 -19 7 6 0.57 2.65
 19 7 -6 1.16 2.96
 17 -7 -6 -2.09 2.06
 17 -7 -6 -2.09 2.06
 -17 -7 6 -2.07 -2.67
 17 7 -6 -2.07 2.67
 17 7 -6 -2.07 2.67
 -17 7 6 -2.09 -2.06
 15 -7 -6 -4.69 1.45
 -15 -7 6 -3.82 -1.55
 15 -7 -6 -4.69 1.45
 15 7 -6 -3.82 1.55
 15 7 -6 -3.82 1.55
 -15 7 6 -4.69 -1.45
 13 -7 -6 -3.20 1.41
 -13 7 6 -3.20 -1.41
 13 7 -6 -2.77 0.27
 13 7 -6 -2.77 0.27
 11 -7 -6 -0.55 0.48
 -11 -7 6 0.05 -1.23
 -11 7 6 -0.55 -0.48
 11 7 -6 0.05 1.23
 11 7 -6 0.05 1.23
 9 -7 -6 -2.53 0.24
 -9 -7 6 -2.76 -0.37
 9 -7 -6 -2.53 0.24
 9 7 -6 -2.76 0.37
 -9 7 6 -2.53 -0.24
 9 7 -6 -2.76 0.37
 7 -7 -6 2.47 1.04
 -7 -7 6 2.18 -3.34
 7 -7 -6 2.47 1.04
 7 7 -6 2.18 3.34
 7 7 -6 2.18 3.34
 5 -7 -6 0.24 -3.48
 -5 -7 6 0.36 -0.32
 5 -7 -6 0.24 -3.48
 -5 -7 6 0.36 -0.32
 -5 7 6 0.24 3.48
 5 7 -6 0.36 0.32
 3 -7 -6 1.15 -1.95
 3 -7 -6 1.15 -1.95
 -3 -7 6 1.69 4.57
 3 7 -6 1.69 -4.57
 -3 7 6 1.15 1.95
 -1 -7 6 -3.61 -1.67
 1 -7 -6 -3.72 4.69
 1 -7 -6 -3.72 4.69
 -1 7 6 -3.72 -4.69
 -1 -7 -6 -8.36 -1.15
 1 -7 6 -8.46 -0.38
 -1 -7 -6 -8.36 -1.15
 1 7 6 -8.36 1.15
 -1 7 -6 -8.46 0.38
 3 -7 6 -1.43 -3.22
 -3 -7 -6 -0.73 -0.69
 -3 -7 -6 -0.73 -0.69
 -3 7 -6 -1.43 3.22
 3 7 6 -0.73 0.69
 -5 -7 -6 4.41 -0.63
 -5 -7 -6 4.41 -0.63
 5 -7 6 4.38 -0.12
 -5 7 -6 4.38 0.12
 -5 7 -6 4.38 0.12
 5 7 6 4.41 0.63
 7 -7 6 7.37 -1.10
 -7 -7 -6 6.80 0.81
 -7 -7 -6 6.80 0.81
 -7 7 -6 7.37 1.10
 7 7 6 6.80 -0.81
 -9 -7 -6 -4.09 0.06
 9 -7 6 -2.93 3.89
 -9 -7 -6 -4.09 0.06
 9 7 6 -4.09 -0.06
 -9 7 -6 -2.93 -3.89
 11 -7 6 -9.35 0.83
 -11 -7 -6 -9.80 0.21
 -11 -7 -6 -9.80 0.21
 11 7 6 -9.80 -0.21
 -11 7 -6 -9.35 -0.83
 13 -7 6 -5.54 5.17
 -13 -7 -6 -4.10 1.73
 -13 -7 -6 -4.10 1.73
 13 7 6 -4.10 -1.73
 -13 7 -6 -5.54 -5.17
 -15 -7 -6 -1.75 1.64
 -15 -7 -6 -1.75 1.64
 15 7 6 -1.75 -1.64
 -15 7 -6 -2.72 -5.18
 -17 -7 -6 -0.80 -1.74
 -17 7 -6 -1.53 0.55
 17 7 6 -0.80 1.74
 -19 -7 -6 -0.66 -4.12
 19 7 6 -0.66 4.12
 -19 7 -6 -0.43 2.60
 -21 -7 -6 -0.34 0.03
 21 7 6 -0.34 -0.03
 -21 7 -6 -0.07 4.97
 -23 -7 -6 -5.28 -3.42
 -23 7 -6 -3.14 4.33
 23 7 6 -5.28 3.42
 30 -8 -6 1.39 2.56
 30 -8 -6 1.39 2.56
 -30 -8 6 0.63 3.12
 30 8 -6 0.63 -3.12
 28 -8 -6 0.03 -1.47
 28 -8 -6 0.03 -1.47
 -28 -8 6 0.06 -0.36
 28 8 -6 0.06 0.36
 -26 -8 6 -2.72 -4.84
 26 -8 -6 -1.89 -3.78
 26 -8 -6 -1.89 -3.78
 26 8 -6 -2.72 4.84
 26 8 -6 -2.72 4.84
 -24 -8 6 1.63 -2.55
 24 -8 -6 1.80 -0.23
 24 -8 -6 1.80 -0.23
 24 8 -6 1.63 2.55
 24 8 -6 1.63 2.55
 22 -8 -6 -2.20 2.54
 -22 -8 6 -2.30 -0.34
 22 -8 -6 -2.20 2.54
 22 8 -6 -2.30 0.34
 22 8 -6 -2.30 0.34
 20 -8 -6 -0.72 1.60
 20 -8 -6 -0.72 1.60
 -20 -8 6 -0.70 -0.29
 20 8 -6 -0.70 0.29
 20 8 -6 -0.70 0.29
 -18 -8 6 -1.11 -2.55
 18 -8 -6 -0.53 -3.96
 18 -8 -6 -0.53 -3.96
 18 8 -6 -1.11 2.55
 18 8 -6 -1.11 2.55
 -18 8 6 -0.53 3.96
 16 -8 -6 0.93 -2.48
 -16 -8 6 0.40 -1.95
 16 -8 -6 0.93 -2.48
 16 8 -6 0.40 1.95
 16 8 -6 0.40 1.95
 -16 8 6 0.93 2.48
 14 -8 -6 -1.78 -4.88
 14 -8 -6 -1.78 -4.88
 -14 -8 6 -3.70 -5.68
 14 8 -6 -3.70 5.68
 14 8 -6 -3.70 5.68
 -14 8 6 -1.78 4.88
 12 -8 -6 -7.79 -3.38
 12 8 -6 -8.63 1.74
 -12 8 6 -7.79 3.38
 12 8 -6 -8.63 1.74
 10 -8 -6 -2.30 2.83
 -10 -8 6 -3.23 0.76
 10 -8 -6 -2.30 2.83
 10 8 -6 -3.23 -0.76
 10 8 -6 -3.23 -0.76
 -10 8 6 -2.30 -2.83
 8 -8 -6 2.70 2.30
 -8 -8 6 2.16 3.15
 8 -8 -6 2.70 2.30
 8 8 -6 2.16 -3.15
 -8 8 6 2.70 -2.30
 6 -8 -6 0.16 -0.20
 -6 -8 6 -0.92 -1.86
 6 -8 -6 0.16 -0.20
 6 8 -6 -0.92 1.86
 -6 8 6 0.16 0.20
 4 -8 -6 3.58 1.60
 -4 -8 6 2.66 -2.93
 4 -8 -6 3.58 1.60
 4 8 -6 2.66 2.93
 -4 8 6 3.58 -1.60
 -2 -8 6 -8.57 -3.72
 2 -8 -6 -8.22 -3.29
 2 -8 -6 -8.22 -3.29
 -2 8 6 -8.22 3.29
 0 -8 -6 -0.63 0.69
 0 -8 -6 -0.63 0.69
 0 -8 6 -0.55 -5.25
 0 8 6 -0.63 -0.69
 0 8 -6 -0.55 5.25
 -2 -8 -6 1.02 -2.83
 2 -8 6 1.93 3.52
 -2 -8 -6 1.02 -2.83
 2 8 6 1.02 2.83
 -2 8 -6 1.93 -3.52
 -4 -8 -6 1.84 0.44
 -4 -8 -6 1.84 0.44
 4 -8 6 1.81 2.24
 -4 8 -6 1.81 -2.24
 4 8 6 1.84 -0.44
 -6 -8 -6 -4.41 -1.43
 6 -8 6 -5.03 -0.47
 -6 -8 -6 -4.41 -1.43
 -6 8 -6 -5.03 0.47
 6 8 6 -4.41 1.43
 -8 -8 -6 -9.40 4.15
 8 -8 6 -10.09 -3.23
 -8 -8 -6 -9.40 4.15
 8 8 6 -9.40 -4.15
 -8 8 -6 -10.09 3.23
 -10 -8 -6 -0.64 0.70
 -10 -8 -6 -0.64 0.70
 10 -8 6 -1.87 0.95
 10 8 6 -0.64 -0.70
 -10 8 -6 -1.87 -0.95
 -12 -8 -6 -1.61 3.64
 12 -8 6 -1.06 -1.04
 -12 -8 -6 -1.61 3.64
 12 8 6 -1.61 -3.64
 -12 8 -6 -1.06 1.04
 -14 -8 -6 4.47 -2.65
 -14 -8 -6 4.47 -2.65
 -14 8 -6 5.72 2.74
 14 8 6 4.47 2.65
 -16 -8 -6 4.47 1.14
 -16 -8 -6 4.47 1.14
 -16 8 -6 5.27 -3.12
 16 8 6 4.47 -1.14
 -18 -8 -6 2.08 1.66
 18 8 6 2.08 -1.66
 -18 8 -6 3.08 -1.39
 -20 -8 -6 -0.29 1.46
 20 8 6 -0.29 -1.46
 -20 8 -6 -0.38 -3.01
 -22 -8 -6 0.92 -2.30
 -22 8 -6 0.10 -1.94
 22 8 6 0.92 2.30
 -29 -9 6 0.12 -6.02
 29 -9 -6 -0.35 -5.41
 29 9 -6 0.12 6.02
 -27 -9 6 1.95 -2.10
 27 -9 -6 1.25 -3.10
 27 9 -6 1.95 2.10
 25 -9 -6 0.73 -0.55
 25 -9 -6 0.73 -0.55
 -25 -9 6 1.40 -0.21
 25 9 -6 1.40 0.21
 -23 -9 6 1.78 0.37
 23 -9 -6 1.88 -1.66
 23 -9 -6 1.88 -1.66
 23 9 -6 1.78 -0.37
 21 -9 -6 1.48 -1.17
 21 -9 -6 1.48 -1.17
 -21 -9 6 1.75 -0.47
 21 9 -6 1.75 0.47
 -19 -9 6 -2.93 2.91
 19 -9 -6 -2.63 -0.05
 19 -9 -6 -2.63 -0.05
 19 9 -6 -2.93 -2.91
 17 -9 -6 -1.78 0.06
 17 -9 -6 -1.78 0.06
 -17 -9 6 -0.03 -1.10
 -17 9 6 -1.78 -0.06
 17 9 -6 -0.03 1.10
 15 -9 -6 -2.68 -1.03
 15 -9 -6 -2.68 -1.03
 -15 -9 6 -1.83 1.48
 15 9 -6 -1.83 -1.48
 -15 9 6 -2.68 1.03
 13 -9 -6 1.04 6.64
 13 -9 -6 1.04 6.64
 -13 -9 6 2.35 -0.53
 13 9 -6 2.35 0.53
 -13 9 6 1.04 -6.64
 11 -9 -6 -1.99 2.03
 11 9 -6 -1.61 0.69
 -11 9 6 -1.99 -2.03
 -9 -9 6 -8.16 -0.22
 9 -9 -6 -9.45 -1.36
 9 -9 -6 -9.45 -1.36
 -9 9 6 -9.45 1.36
 9 9 -6 -8.16 0.22
 7 -9 -6 -5.73 -3.48
 7 -9 -6 -5.73 -3.48
 -7 -9 6 -5.01 0.23
 -7 -9 6 -5.01 0.23
 -7 9 6 -5.73 3.48
 5 -9 -6 -7.96 -2.05
 -5 -9 6 -6.42 4.42
 5 -9 -6 -7.96 -2.05
 -5 9 6 -7.96 2.05
 3 -9 -6 0.77 4.12
 -3 -9 6 0.29 -0.92
 3 -9 -6 0.77 4.12
 3 9 -6 0.29 0.92
 -3 9 6 0.77 -4.12
 1 -9 -6 4.06 -4.34
 -1 -9 6 3.92 6.88
 1 -9 -6 4.06 -4.34
 -1 9 6 4.06 4.34
 -1 -9 -6 -2.73 3.34
 1 -9 6 -2.79 4.09
 -1 -9 -6 -2.73 3.34
 1 9 6 -2.73 -3.34
 -1 9 -6 -2.79 -4.09
 -3 -9 -6 -6.30 1.48
 3 -9 6 -6.10 -4.81
 -3 -9 -6 -6.30 1.48
 3 9 6 -6.30 -1.48
 -3 9 -6 -6.10 4.81
 -5 -9 -6 -3.01 -1.27
 5 -9 6 -2.08 3.90
 -5 -9 -6 -3.01 -1.27
 5 9 6 -3.01 1.27
 -5 9 -6 -2.08 -3.90
 -7 -9 -6 5.47 0.97
 7 -9 6 5.69 2.32
 -7 -9 -6 5.47 0.97
 7 9 6 5.47 -0.97
 -7 9 -6 5.69 -2.32
 -9 -9 -6 8.13 1.39
 9 -9 6 7.83 -2.23
 -9 -9 -6 8.13 1.39
 -9 9 -6 7.83 2.23
 9 9 6 8.13 -1.39
 -11 -9 -6 7.14 -0.16
 11 -9 6 6.63 0.71
 -11 -9 -6 7.14 -0.16
 11 9 6 7.14 0.16
 -11 9 -6 6.63 -0.71
 -13 -9 -6 1.44 0.64
 13 -9 6 0.04 0.36
 -13 -9 -6 1.44 0.64
 -13 9 -6 0.04 -0.36
 13 9 6 1.44 -0.64
 -15 -9 -6 -3.15 3.54
 -15 -9 -6 -3.15 3.54
 -15 9 -6 -3.25 -1.90
 15 9 6 -3.15 -3.54
 -17 -9 -6 -3.21 1.76
 17 9 6 -3.21 -1.76
 -17 9 -6 -3.56 -0.87
 -19 -9 -6 0.73 0.58
 19 9 6 0.73 -0.58
 -19 9 -6 0.71 0.30
 -21 -9 -6 0.95 1.51
 21 9 6 0.95 -1.51
 -21 9 -6 1.03 0.58
 -28 -10 6 -0.31 4.22
 28 -10 -6 0.35 4.67
 28 10 -6 -0.31 -4.22
 26 -10 -6 1.65 2.83
 -26 -10 6 1.15 0.58
 26 10 -6 1.15 -0.58
 -24 -10 6 -3.07 -1.00
 24 -10 -6 -2.56 -1.05
 24 10 -6 -3.07 1.00
 22 -10 -6 -4.86 -0.20
 -22 -10 6 -5.65 -2.06
 22 10 -6 -5.65 2.06
 20 -10 -6 -1.96 -3.28
 20 -10 -6 -1.96 -3.28
 -20 -10 6 -1.98 -2.96
 20 10 -6 -1.98 2.96
 -18 -10 6 -2.64 -1.65
 18 -10 -6 -2.58 -0.16
 18 -10 -6 -2.58 -0.16
 18 10 -6 -2.64 1.65
 16 -10 -6 -1.11 -0.32
 16 -10 -6 -1.11 -0.32
 -16 -10 6 -1.57 0.37
 -16 10 6 -1.11 0.32
 16 10 -6 -1.57 -0.37
 14 -10 -6 3.56 3.82
 -14 -10 6 3.63 -7.00
 14 -10 -6 3.56 3.82
 -14 10 6 3.56 -3.82
 14 10 -6 3.63 7.00
 12 -10 -6 3.27 -0.34
 12 -10 -6 3.27 -0.34
 -12 -10 6 2.88 -1.93
 12 10 -6 2.88 1.93
 -12 10 6 3.27 0.34
 -10 -10 6 5.74 -3.82
 10 -10 -6 6.27 0.50
 10 -10 -6 6.27 0.50
 10 10 -6 5.74 3.82
 -10 10 6 6.27 -0.50
 -8 -10 6 2.76 0.05
 8 -10 -6 2.47 -2.99
 8 -10 -6 2.47 -2.99
 8 10 -6 2.76 -0.05
 -8 10 6 2.47 2.99
 -6 -10 6 1.83 -2.70
 6 -10 -6 2.84 2.58
 6 -10 -6 2.84 2.58
 6 10 -6 1.83 2.70
 -6 10 6 2.84 -2.58
 4 -10 -6 -0.56 -2.16
 -4 -10 6 -1.14 -0.80
 4 -10 -6 -0.56 -2.16
 -4 10 6 -0.56 2.16
 4 10 -6 -1.14 0.80
 -2 -10 6 -2.58 -2.99
 2 -10 -6 -3.01 3.18
 2 -10 -6 -3.01 3.18
 -2 10 6 -3.01 -3.18
 2 10 -6 -2.58 2.99
 0 -10 -6 -3.33 4.76
 0 -10 -6 -3.33 4.76
 0 -10 6 -3.53 -5.95
 0 10 -6 -3.53 5.95
 0 10 6 -3.33 -4.76
 2 -10 6 1.18 0.46
 -2 -10 -6 0.69 -3.05
 -2 -10 -6 0.69 -3.05
 -2 10 -6 1.18 -0.46
 2 10 6 0.69 3.05
 -4 -10 -6 4.76 -5.73
 4 -10 6 4.29 0.17
 -4 -10 -6 4.76 -5.73
 4 10 6 4.76 5.73
 -4 10 -6 4.29 -0.17
 6 -10 6 -0.80 -4.54
 -6 -10 -6 -1.08 -3.01
 -6 -10 -6 -1.08 -3.01
 -6 10 -6 -0.80 4.54
 6 10 6 -1.08 3.01
 8 -10 6 -6.17 -1.37
 -8 -10 -6 -6.10 -6.21
 -8 -10 -6 -6.10 -6.21
 -8 10 -6 -6.17 1.37
 8 10 6 -6.10 6.21
 -10 -10 -6 -7.18 -2.05
 -10 -10 -6 -7.18 -2.05
 10 -10 6 -6.32 -4.53
 10 10 6 -7.18 2.05
 -10 10 -6 -6.32 4.53
 12 -10 6 -5.69 -6.07
 -12 -10 -6 -6.07 0.83
 -12 -10 -6 -6.07 0.83
 12 10 6 -6.07 -0.83
 -12 10 -6 -5.69 6.07
 -14 -10 -6 -2.64 -3.07
 -14 -10 -6 -2.64 -3.07
 14 10 6 -2.64 3.07
 -14 10 -6 -2.20 4.63
 -16 -10 -6 3.40 -8.94
 -16 -10 -6 3.40 -8.94
 -16 10 -6 2.34 9.09
 16 10 6 3.40 8.94
 -18 -10 -6 2.22 -3.68
 -18 10 -6 2.19 3.65
 18 10 6 2.22 3.68
 -20 -10 -6 -1.92 -3.76
 20 10 6 -1.92 3.76
 -20 10 -6 -2.00 3.51
 25 -11 -6 0.19 -0.68
 -25 -11 6 0.41 -2.40
 25 11 -6 0.41 2.40
 -23 -11 6 2.91 -6.08
 23 -11 -6 2.15 -0.50
 23 11 -6 2.91 6.08
 -21 -11 6 2.33 0.30
 21 -11 -6 2.09 1.27
 21 11 -6 2.33 -0.30
 -19 -11 6 1.57 -0.16
 19 -11 -6 2.24 2.25
 19 11 -6 1.57 0.16
 -17 -11 6 -0.03 -1.04
 17 -11 -6 0.56 -0.10
 17 11 -6 -0.03 1.04
 -15 -11 6 -1.48 -0.03
 15 -11 -6 -1.04 -2.60
 15 -11 -6 -1.04 -2.60
 -15 11 6 -1.04 2.60
 15 11 -6 -1.48 0.03
 13 -11 -6 -2.92 -9.38
 -13 -11 6 -2.08 9.26
 13 -11 -6 -2.92 -9.38
 13 11 -6 -2.08 -9.26
 -13 11 6 -2.92 9.38
 11 -11 -6 -2.73 -4.71
 -11 -11 6 -1.80 5.50
 11 -11 -6 -2.73 -4.71
 11 11 -6 -1.80 -5.50
 -11 11 6 -2.73 4.71
 -9 -11 6 3.04 3.47
 9 -11 -6 2.48 1.45
 9 -11 -6 2.48 1.45
 9 11 -6 3.04 -3.47
 -9 11 6 2.48 -1.45
 7 -11 -6 0.86 2.41
 7 -11 -6 0.86 2.41
 -7 -11 6 0.97 2.86
 -7 11 6 0.86 -2.41
 7 11 -6 0.97 -2.86
 -5 -11 6 2.29 -0.61
 5 -11 -6 1.05 1.16
 5 -11 -6 1.05 1.16
 -5 11 6 1.05 -1.16
 5 11 -6 2.29 0.61
 3 -11 -6 1.22 -0.33
 -3 -11 6 1.52 -0.81
 3 -11 -6 1.22 -0.33
 -3 11 6 1.22 0.33
 3 11 -6 1.52 0.81
 1 -11 -6 3.54 -0.54
 -1 -11 6 3.26 1.21
 1 -11 -6 3.54 -0.54
 1 11 -6 3.26 -1.21
 -1 11 6 3.54 0.54
 -1 -11 -6 3.28 -3.51
 1 -11 6 3.66 0.30
 -1 -11 -6 3.28 -3.51
 1 11 6 3.28 3.51
 -1 11 -6 3.66 -0.30
 3 -11 6 -2.43 0.29
 -3 -11 -6 -2.00 3.63
 -3 -11 -6 -2.00 3.63
 3 11 6 -2.00 -3.63
 -3 11 -6 -2.43 -0.29
 -5 -11 -6 -2.03 0.21
 5 -11 6 -0.51 0.49
 -5 -11 -6 -2.03 0.21
 5 11 6 -2.03 -0.21
 -5 11 -6 -0.51 -0.49
 7 -11 6 1.89 1.60
 -7 -11 -6 2.39 0.30
 -7 -11 -6 2.39 0.30
 7 11 6 2.39 -0.30
 -7 11 -6 1.89 -1.60
 -9 -11 -6 0.44 2.55
 -9 -11 -6 0.44 2.55
 9 -11 6 2.06 5.24
 9 11 6 0.44 -2.55
 -9 11 -6 2.06 -5.24
 -11 -11 -6 0.68 -0.63
 11 -11 6 0.70 6.10
 -11 -11 -6 0.68 -0.63
 -11 11 -6 0.70 -6.10
 11 11 6 0.68 0.63
 -13 -11 -6 3.74 -2.79
 -13 -11 -6 3.74 -2.79
 -13 11 -6 4.06 -2.72
 13 11 6 3.74 2.79
 -15 -11 -6 -3.87 2.17
 -15 -11 -6 -3.87 2.17
 -15 11 -6 -3.50 -1.43
 15 11 6 -3.87 -2.17
 -17 -11 -6 -3.73 1.16
 -17 11 -6 -3.43 -0.50
 17 11 6 -3.73 -1.16
 24 -12 -6 -1.15 -2.81
 -24 -12 6 -1.75 5.43
 24 12 -6 -1.75 -5.43
 -22 -12 6 0.25 3.16
 22 -12 -6 0.95 -4.57
 22 12 -6 0.25 -3.16
 -20 -12 6 -1.54 -6.33
 20 -12 -6 -1.53 -5.13
 20 12 -6 -1.54 6.33
 -18 -12 6 2.46 -1.13
 18 -12 -6 2.43 -7.07
 18 12 -6 2.46 1.13
 -16 -12 6 -2.03 0.37
 16 -12 -6 -1.48 -3.67
 16 12 -6 -2.03 -0.37
 -14 -12 6 0.64 2.35
 14 -12 -6 1.08 -1.46
 -14 12 6 1.08 1.46
 14 12 -6 0.64 -2.35
 12 -12 -6 -2.58 5.75
 -12 -12 6 -3.54 -5.21
 -12 12 6 -2.58 -5.75
 12 12 -6 -3.54 5.21
 -10 -12 6 -0.57 -3.21
 10 -12 -6 0.27 -1.28
 -10 12 6 0.27 1.28
 10 12 -6 -0.57 3.21
 8 -12 -6 -0.77 -0.03
 -8 -12 6 -0.87 -0.68
 8 12 -6 -0.87 0.68
 -8 12 6 -0.77 0.03
 -6 -12 6 0.31 -1.54
 6 -12 -6 0.33 -3.27
 6 -12 -6 0.33 -3.27
 -6 12 6 0.33 3.27
 6 12 -6 0.31 1.54
 4 -12 -6 1.34 0.35
 -4 -12 6 0.79 5.88
 4 -12 -6 1.34 0.35
 4 12 -6 0.79 -5.88
 -4 12 6 1.34 -0.35
 -2 -12 6 -0.54 6.61
 2 -12 -6 -1.26 -2.44
 2 -12 -6 -1.26 -2.44
 -2 12 6 -1.26 2.44
 2 12 -6 -0.54 -6.61
 0 -12 -6 -2.89 -1.20
 0 -12 6 -3.47 3.82
 0 -12 -6 -2.89 -1.20
 0 12 6 -2.89 1.20
 0 12 -6 -3.47 -3.82
 -2 -12 -6 -3.06 0.22
 2 -12 6 -2.96 0.73
 -2 -12 -6 -3.06 0.22
 -2 12 -6 -2.96 -0.73
 2 12 6 -3.06 -0.22
 -4 -12 -6 0.15 1.90
 4 -12 6 -0.33 -2.64
 -4 -12 -6 0.15 1.90
 4 12 6 0.15 -1.90
 -4 12 -6 -0.33 2.64
 -6 -12 -6 -2.67 2.78
 6 -12 6 -2.86 -0.83
 -6 -12 -6 -2.67 2.78
 6 12 6 -2.67 -2.78
 -6 12 -6 -2.86 0.83
 -8 -12 -6 -1.89 0.09
 8 -12 6 -1.88 -5.61
 -8 -12 -6 -1.89 0.09
 -8 12 -6 -1.88 5.61
 8 12 6 -1.89 -0.09
 -10 -12 -6 3.42 -5.34
 10 -12 6 3.56 -6.52
 -10 -12 -6 3.42 -5.34
 10 12 6 3.42 5.34
 -10 12 -6 3.56 6.52
 -12 -12 -6 0.67 -7.11
 -12 -12 -6 0.67 -7.11
 12 -12 6 1.71 -5.97
 12 12 6 0.67 7.11
 -12 12 -6 1.71 5.97
 -14 -12 -6 1.84 -1.01
 -14 -12 -6 1.84 -1.01
 -14 12 -6 1.84 0.14
 14 12 6 1.84 1.01
 -16 -12 -6 3.80 1.98
 -16 12 -6 3.42 -2.22
 16 12 6 3.80 -1.98
 23 -13 -6 0.35 4.67
 -23 -13 6 0.34 -4.70
 23 13 -6 0.34 4.70
 21 -13 -6 0.28 3.07
 -21 -13 6 -0.26 3.97
 21 13 -6 -0.26 -3.97
 -19 -13 6 -1.43 2.09
 19 -13 -6 -0.70 4.45
 19 13 -6 -1.43 -2.09
 17 -13 -6 2.57 4.77
 -17 -13 6 3.00 2.18
 17 13 -6 3.00 -2.18
 -15 -13 6 1.66 -0.81
 15 -13 -6 0.90 2.40
 15 13 -6 1.66 0.81
 13 -13 -6 3.35 -3.23
 -13 -13 6 3.88 3.17
 -13 13 6 3.35 3.23
 13 13 -6 3.88 -3.17
 11 -13 -6 3.76 -4.64
 -11 -13 6 4.81 5.95
 -11 13 6 3.76 4.64
 11 13 -6 4.81 -5.95
 9 -13 -6 -3.08 -2.34
 -9 -13 6 -2.06 3.99
 9 13 -6 -2.06 -3.99
 -9 13 6 -3.08 2.34
 7 -13 -6 1.70 0.00
 -7 -13 6 1.87 0.66
 7 13 -6 1.87 -0.66
 -7 13 6 1.70 0.00
 5 -13 -6 0.37 -0.40
 -5 -13 6 1.51 4.02
 5 13 -6 1.51 -4.02
 -5 13 6 0.37 0.40
 3 -13 -6 1.08 -0.99
 -3 -13 6 1.08 -6.38
 3 13 -6 1.08 6.38
 -3 13 6 1.08 0.99
 1 -13 -6 2.03 1.23
 -1 -13 6 2.41 -4.24
 -1 13 6 2.03 -1.23
 1 13 -6 2.41 4.24
 -1 -13 -6 7.64 1.24
 -1 -13 -6 7.64 1.24
 1 -13 6 7.52 -2.61
 1 13 6 7.64 -1.24
 -1 13 -6 7.52 2.61
 -3 -13 -6 4.72 1.43
 -3 -13 -6 4.72 1.43
 3 -13 6 4.75 0.36
 3 13 6 4.72 -1.43
 -3 13 -6 4.75 -0.36
 -5 -13 -6 2.01 1.00
 -5 -13 -6 2.01 1.00
 5 -13 6 2.01 -1.82
 -5 13 -6 2.01 1.82
 5 13 6 2.01 -1.00
 -7 -13 -6 5.90 -6.11
 7 -13 6 8.00 1.42
 -7 -13 -6 5.90 -6.11
 7 13 6 5.90 6.11
 -7 13 -6 8.00 -1.42
 -9 -13 -6 3.08 -3.22
 -9 -13 -6 3.08 -3.22
 9 -13 6 2.30 2.91
 -9 13 -6 2.30 -2.91
 9 13 6 3.08 3.22
 -11 -13 -6 1.00 7.13
 -11 -13 -6 1.00 7.13
 11 -13 6 0.49 6.20
 11 13 6 1.00 -7.13
 -11 13 -6 0.49 -6.20
 -13 -13 -6 -0.97 5.57
 -13 -13 -6 -0.97 5.57
 13 13 6 -0.97 -5.57
 -13 13 -6 -1.97 -1.40
 -15 -13 -6 -0.33 -3.35
 -15 -13 -6 -0.33 -3.35
 -15 13 -6 0.11 2.88
 15 13 6 -0.33 3.35
 20 -14 -6 1.96 -1.85
 -20 -14 6 2.12 0.46
 20 14 -6 2.12 -0.46
 18 -14 -6 0.20 -1.97
 -18 -14 6 -0.16 2.22
 18 14 -6 -0.16 -2.22
 16 -14 -6 2.84 -5.55
 -16 -14 6 1.46 4.50
 16 14 -6 1.46 -4.50
 -14 -14 6 -1.35 1.55
 14 -14 -6 -1.58 -0.88
 14 14 -6 -1.35 -1.55
 -12 -14 6 -1.05 -1.54
 12 -14 -6 -1.31 1.47
 12 14 -6 -1.05 1.54
 -12 14 6 -1.31 -1.47
 -10 -14 6 1.00 -1.03
 10 -14 -6 0.44 1.87
 -10 14 6 0.44 -1.87
 10 14 -6 1.00 1.03
 8 -14 -6 1.89 -4.11
 -8 -14 6 1.47 0.90
 -8 14 6 1.89 4.11
 8 14 -6 1.47 -0.90
 -6 -14 6 -2.23 -3.73
 6 -14 -6 -1.67 0.72
 -6 14 6 -1.67 -0.72
 6 14 -6 -2.23 3.73
 4 -14 -6 -0.22 -1.17
 -4 -14 6 -1.34 -2.39
 -4 14 6 -0.22 1.17
 4 14 -6 -1.34 2.39
 -2 -14 6 0.50 0.45
 2 -14 -6 1.05 -0.08
 -2 14 6 1.05 0.08
 2 14 -6 0.50 -0.45
 0 -14 -6 -2.26 -0.05
 0 -14 6 -2.09 -0.08
 0 14 6 -2.26 0.05
 0 14 -6 -2.09 0.08
 -2 -14 -6 -2.68 1.15
 2 -14 6 -2.28 -0.36
 -2 14 -6 -2.28 0.36
 2 14 6 -2.68 -1.15
 -4 -14 -6 1.82 -2.81
 4 -14 6 2.58 5.63
 -4 14 -6 2.58 -5.63
 4 14 6 1.82 2.81
 6 -14 6 -2.16 5.04
 -6 -14 -6 -1.42 6.49
 6 14 6 -1.42 -6.49
 -6 14 -6 -2.16 -5.04
 -8 -14 -6 -4.86 9.45
 8 -14 6 -4.05 8.05
 -8 14 -6 -4.05 -8.05
 8 14 6 -4.86 -9.45
 10 -14 6 -4.13 -2.57
 -10 -14 -6 -4.75 0.61
 10 14 6 -4.75 -0.61
 -10 14 -6 -4.13 2.57
 -12 -14 -6 -3.35 -3.91
 -12 14 -6 -3.01 1.01
 12 14 6 -3.35 3.91
 17 -15 -6 -1.70 3.01
 -17 -15 6 -0.80 -4.69
 17 15 -6 -0.80 4.69
 -15 -15 6 -2.27 -1.65
 15 -15 -6 -2.39 4.35
 15 15 -6 -2.27 1.65
 -13 -15 6 -1.19 -0.53
 13 -15 -6 0.78 0.60
 13 15 -6 -1.19 0.53
 11 -15 -6 -1.74 -4.30
 -11 -15 6 -2.27 2.79
 11 15 -6 -2.27 -2.79
 -11 15 6 -1.74 4.30
 9 -15 -6 0.14 1.54
 -9 -15 6 -0.21 -0.05
 -9 15 6 0.14 -1.54
 9 15 -6 -0.21 0.05
 7 -15 -6 -0.49 -0.68
 -7 -15 6 0.58 2.22
 -7 15 6 -0.49 0.68
 7 15 -6 0.58 -2.22
 -5 -15 6 2.99 2.69
 5 -15 -6 2.23 -2.17
 -5 15 6 2.23 2.17
 5 15 -6 2.99 -2.69
 3 -15 -6 -0.38 1.44
 -3 -15 6 0.83 0.89
 -3 15 6 -0.38 -1.44
 3 15 -6 0.83 -0.89
 1 -15 -6 -0.94 1.47
 -1 -15 6 -0.25 2.46
 1 15 -6 -0.25 -2.46
 -1 15 6 -0.94 -1.47
 1 -15 6 1.44 0.59
 -1 -15 -6 1.07 0.81
 1 15 6 1.07 -0.81
 -1 15 -6 1.44 -0.59
 3 -15 6 -1.23 0.64
 -3 -15 -6 -0.75 -0.47
 -3 15 -6 -1.23 -0.64
 3 15 6 -0.75 0.47
 5 -15 6 -2.52 1.57
 -5 -15 -6 -2.72 -3.62
 -5 15 -6 -2.52 -1.57
 5 15 6 -2.72 3.62
 7 -15 6 -0.36 -7.47
 -7 -15 -6 1.11 -7.39
 -7 15 -6 -0.36 7.47
 7 15 6 1.11 7.39
 9 -15 6 0.62 -2.07
 -9 -15 -6 1.57 -3.38
 9 15 6 1.57 3.38
 -9 15 -6 0.62 2.07
 14 -16 -6 1.84 -3.23
 -14 -16 6 2.97 -1.37
 14 16 -6 2.97 1.37
 12 -16 -6 -1.31 1.77
 -12 -16 6 -0.75 -1.38
 12 16 -6 -0.75 1.38
 -10 -16 6 -0.85 -1.13
 10 -16 -6 0.00 0.66
 10 16 -6 -0.85 1.13
 -10 16 6 0.00 -0.66
 -8 -16 6 -1.26 -0.25
 8 -16 -6 -0.93 0.87
 8 16 -6 -1.26 0.25
 -8 16 6 -0.93 -0.87
 6 -16 -6 0.41 1.45
 -6 -16 6 -0.23 1.52
 6 16 -6 -0.23 -1.52
 -6 16 6 0.41 -1.45
 -4 -16 6 0.14 0.68
 4 -16 -6 -0.19 5.64
 4 16 -6 0.14 -0.68
 -4 16 6 -0.19 -5.64
 2 -16 -6 2.97 1.21
 -2 -16 6 3.20 0.97
 -2 16 6 2.97 -1.21
 2 16 -6 3.20 -0.97
 0 -16 -6 0.42 -0.99
 0 -16 6 -0.24 2.56
 0 16 -6 -0.24 -2.56
 0 16 6 0.42 0.99
 2 -16 6 -1.21 3.97
 -2 -16 -6 -1.18 -1.19
 -2 16 -6 -1.21 -3.97
 2 16 6 -1.18 1.19
 -4 -16 -6 1.54 2.13
 4 -16 6 1.87 -3.79
 4 16 6 1.54 -2.13
 -4 16 -6 1.87 3.79
 6 -16 6 1.78 0.66
 -6 -16 -6 2.44 1.40
 6 16 6 2.44 -1.40
 -6 16 -6 1.78 -0.66
 7 -17 -6 -0.34 -0.16
 -7 -17 6 -0.23 0.82
 7 17 -6 -0.23 -0.82
 -7 17 6 -0.34 0.16
 5 -17 -6 -3.12 -1.08
 -5 -17 6 -2.65 0.86
 5 17 -6 -2.65 -0.86
 -5 17 6 -3.12 1.08
 3 -17 -6 -2.23 -4.88
 -3 -17 6 -2.81 3.61
 -3 17 6 -2.23 4.88
 3 17 -6 -2.81 -3.61
 1 -17 -6 -0.94 0.51
 -1 -17 6 -0.29 0.39
 -1 17 6 -0.94 -0.51
 1 17 -6 -0.29 -0.39
 33 -1 -7 -5.56 3.92
 33 1 -7 6.14 1.23
 31 -1 -7 -1.60 4.12
 31 1 -7 2.33 4.12
 29 -1 -7 -3.04 2.61
 29 1 -7 3.54 1.80
 27 -1 -7 2.14 -0.13
 27 1 -7 -2.18 -3.50
 27 1 -7 -2.18 -3.50
 25 -1 -7 4.61 -1.11
 25 1 -7 -4.19 1.42
 25 1 -7 -4.19 1.42
 23 -1 -7 8.09 -3.73
 23 1 -7 -6.74 -0.39
 23 1 -7 -6.74 -0.39
 21 -1 -7 10.10 -9.17
 21 1 -7 -8.41 7.05
 21 1 -7 -8.41 7.05
 19 1 -7 -1.00 0.36
 19 1 -7 -1.00 0.36
 17 -1 -7 -5.55 1.28
 17 -1 -7 -5.55 1.28
 17 1 -7 5.90 -1.89
 17 1 -7 5.90 -1.89
 15 -1 -7 -8.42 -3.62
 15 -1 -7 -8.42 -3.62
 15 -1 -7 -8.42 -3.62
 15 1 -7 9.35 2.12
 15 1 -7 9.35 2.12
 13 -1 -7 7.74 -10.13
 13 -1 -7 7.74 -10.13
 13 1 -7 -7.58 9.89
 13 1 -7 -7.58 9.89
 11 -1 -7 8.49 -7.26
 11 -1 -7 8.49 -7.26
 11 1 -7 -6.78 9.30
 11 1 -7 -6.78 9.30
 9 -1 -7 -6.34 8.72
 9 1 -7 7.07 -4.30
 9 1 -7 7.07 -4.30
 7 -1 -7 -3.09 2.70
 7 -1 -7 -3.09 2.70
 7 1 -7 3.09 4.12
 7 1 -7 3.09 4.12
 5 -1 -7 -88.76 -0.34
 5 -1 -7 -88.76 -0.34
 5 1 -7 89.65 1.30
 5 1 -7 89.65 1.30
 3 -1 -7 16.09 -2.05
 3 -1 -7 16.09 -2.05
 3 1 -7 -16.79 6.80
 1 -1 -7 -32.14 -12.14
 1 -1 -7 -32.14 -12.14
 -1 -1 7 32.98 -10.57
 1 1 -7 32.98 10.57
 -1 1 7 -32.14 12.14
 -1 1 7 -32.14 12.14
 -1 -1 -7 -18.89 -3.73
 -1 -1 -7 -18.89 -3.73
 -1 1 -7 17.19 2.61
 1 1 7 -18.89 3.73
 1 1 7 -18.89 3.73
 -3 -1 -7 -11.63 0.67
 3 1 7 -11.63 -0.67
 -3 1 -7 10.28 -0.45
 -5 -1 -7 -0.44 1.47
 -5 -1 -7 -0.44 1.47
 -5 -1 -7 -0.44 1.47
 5 1 7 -0.44 -1.47
 -5 1 -7 -0.38 0.64
 -7 -1 -7 4.86 6.88
 -7 -1 -7 4.86 6.88
 7 1 7 4.86 -6.88
 -7 1 -7 -4.81 -4.82
 -9 -1 -7 1.22 -2.88
 -9 -1 -7 1.22 -2.88
 -11 -1 -7 -3.31 -2.88
 11 1 7 -3.31 2.88
 -13 -1 -7 -1.95 -1.47
 13 1 7 -1.95 1.47
 32 -2 -7 1.69 -3.18
 32 2 -7 -2.23 -1.75
 30 -2 -7 -0.82 -3.40
 30 2 -7 0.27 -3.23
 28 -2 -7 -2.75 -0.76
 28 2 -7 2.63 1.30
 28 2 -7 2.63 1.30
 26 -2 -7 -1.91 -0.87
 26 2 -7 1.06 2.13
 26 2 -7 1.06 2.13
 24 -2 -7 -6.12 2.51
 24 2 -7 5.36 -0.27
 24 2 -7 5.36 -0.27
 22 -2 -7 -10.38 2.08
 22 -2 -7 -10.38 2.08
 22 2 -7 9.04 -6.70
 22 2 -7 9.04 -6.70
 20 -2 -7 -10.75 6.49
 20 -2 -7 -10.75 6.49
 20 2 -7 10.48 -4.46
 20 2 -7 10.48 -4.46
 18 -2 -7 -6.03 -5.43
 18 -2 -7 -6.03 -5.43
 18 2 -7 6.90 -4.70
 18 2 -7 6.90 -4.70
 16 -2 -7 7.12 -0.41
 16 -2 -7 7.12 -0.41
 16 2 -7 -7.94 -2.50
 16 2 -7 -7.94 -2.50
 14 -2 -7 -0.19 10.01
 14 -2 -7 -0.19 10.01
 14 2 -7 0.13 -13.35
 14 2 -7 0.13 -13.35
 12 -2 -7 -18.34 19.32
 12 2 -7 17.35 -19.48
 -12 2 7 -18.34 -19.32
 12 2 -7 17.35 -19.48
 10 -2 -7 -23.26 1.88
 10 -2 -7 -23.26 1.88
 10 2 -7 22.79 -6.12
 10 2 -7 22.79 -6.12
 8 -2 -7 -39.66 1.12
 8 2 -7 39.88 -4.96
 8 2 -7 39.88 -4.96
 6 -2 -7 0.52 -3.07
 -6 2 7 0.52 3.07
 6 2 -7 -2.65 3.48
 6 2 -7 -2.65 3.48
 4 -2 -7 -6.18 -3.17
 -4 -2 7 6.17 0.01
 -4 2 7 -6.18 3.17
 4 2 -7 6.17 -0.01
 4 2 -7 6.17 -0.01
 -2 -2 7 31.61 -7.51
 2 -2 -7 -31.90 -8.41
 2 2 -7 31.61 7.51
 -2 2 7 -31.90 8.41
 0 -2 7 -27.24 -1.57
 0 -2 -7 26.64 2.07
 0 2 -7 -27.24 1.57
 0 2 7 26.64 -2.07
 0 2 -7 -27.24 1.57
 -2 -2 -7 25.65 -3.38
 2 -2 7 -24.09 -3.57
 -2 -2 -7 25.65 -3.38
 -2 2 -7 -24.09 3.57
 -2 2 -7 -24.09 3.57
 2 2 7 25.65 3.38
 4 -2 7 -7.50 4.31
 -4 -2 -7 8.19 -0.57
 -4 -2 -7 8.19 -0.57
 -4 2 -7 -7.50 -4.31
 4 2 7 8.19 0.57
 -4 2 -7 -7.50 -4.31
 -6 -2 -7 -16.90 -3.49
 6 -2 7 17.70 4.34
 -6 -2 -7 -16.90 -3.49
 -6 2 -7 17.70 -4.34
 6 2 7 -16.90 3.49
 -8 -2 -7 -16.70 -1.74
 -8 -2 -7 -16.70 -1.74
 8 2 7 -16.70 1.74
 -10 -2 -7 0.80 -1.98
 -10 -2 -7 0.80 -1.98
 -12 -2 -7 7.89 0.05
 -12 -2 -7 7.89 0.05
 14 2 7 6.06 0.82
 16 2 7 0.38 1.70
 18 2 7 -1.33 5.16
 -22 -2 -7 1.36 1.47
 -24 -2 -7 1.66 -0.08
 33 -3 -7 1.14 1.82
 -33 -3 7 -1.46 -1.64
 33 3 -7 -1.46 1.64
 31 -3 -7 0.90 -1.47
 31 3 -7 -0.64 -2.40
 29 -3 -7 1.75 0.97
 29 3 -7 -1.52 0.06
 29 3 -7 -1.52 0.06
 27 -3 -7 -2.74 3.19
 27 3 -7 3.42 -0.22
 27 3 -7 3.42 -0.22
 25 -3 -7 -2.47 -3.12
 25 -3 -7 -2.47 -3.12
 25 3 -7 2.41 -0.22
 25 3 -7 2.41 -0.22
 23 -3 -7 0.49 0.23
 23 -3 -7 0.49 0.23
 23 3 -7 0.25 5.32
 23 3 -7 0.25 5.32
 21 -3 -7 0.50 -1.17
 21 -3 -7 0.50 -1.17
 21 3 -7 0.71 -0.51
 21 3 -7 0.71 -0.51
 19 -3 -7 -0.30 1.58
 19 -3 -7 -0.30 1.58
 19 3 -7 0.48 0.63
 19 3 -7 0.48 0.63
 17 -3 -7 -14.55 6.36
 17 -3 -7 -14.55 6.36
 17 3 -7 14.00 0.73
 17 3 -7 14.00 0.73
 15 -3 -7 -18.45 -1.52
 15 -3 -7 -18.45 -1.52
 15 3 -7 18.83 4.07
 15 3 -7 18.83 4.07
 13 -3 -7 -14.46 -13.55
 13 3 -7 14.32 12.58
 -13 3 7 -14.46 13.55
 13 3 -7 14.32 12.58
 11 -3 -7 -7.06 -5.34
 11 -3 -7 -7.06 -5.34
 11 3 -7 6.48 6.24
 -11 3 7 -7.06 5.34
 11 3 -7 6.48 6.24
 9 -3 -7 10.31 0.21
 -9 -3 7 -11.74 -4.99
 9 -3 -7 10.31 0.21
 9 3 -7 -11.74 4.99
 9 3 -7 -11.74 4.99
 -9 3 7 10.31 -0.21
 7 -3 -7 -16.50 -2.64
 7 -3 -7 -16.50 -2.64
 -7 3 7 -16.50 2.64
 7 3 -7 17.61 -1.00
 7 3 -7 17.61 -1.00
 -5 -3 7 -13.93 -8.48
 5 -3 -7 14.49 -3.40
 5 3 -7 -13.93 8.48
 5 3 -7 -13.93 8.48
 -5 3 7 14.49 3.40
 3 -3 -7 6.86 -5.80
 -3 -3 7 -7.30 -3.98
 3 -3 -7 6.86 -5.80
 -3 3 7 6.86 5.80
 3 3 -7 -7.30 3.98
 1 -3 -7 32.67 -4.40
 1 -3 -7 32.67 -4.40
 -1 -3 7 -31.75 0.44
 1 3 -7 -31.75 -0.44
 -1 3 7 32.67 4.40
 1 3 -7 -31.75 -0.44
 -1 -3 -7 -10.23 -7.94
 -1 -3 -7 -10.23 -7.94
 1 -3 7 9.60 -4.55
 -1 3 -7 9.60 4.55
 1 3 7 -10.23 7.94
 -3 -3 -7 -7.00 3.82
 -3 -3 -7 -7.00 3.82
 3 -3 7 6.70 2.02
 -3 3 -7 6.70 -2.02
 3 3 7 -7.00 -3.82
 5 -3 7 -5.53 -2.02
 -5 -3 -7 4.34 3.24
 5 3 7 4.34 -3.24
 -5 3 -7 -5.53 2.02
 7 -3 7 -13.71 -1.33
 -7 -3 -7 12.92 2.41
 -7 -3 -7 12.92 2.41
 -7 3 -7 -13.71 1.33
 7 3 7 12.92 -2.41
 -9 -3 -7 9.52 4.92
 9 -3 7 -8.55 3.99
 -9 -3 -7 9.52 4.92
 9 3 7 9.52 -4.92
 11 -3 7 4.43 2.46
 -11 -3 -7 -4.34 2.79
 -13 -3 -7 -7.89 -2.78
 -13 -3 -7 -7.89 -2.78
 13 3 7 -7.89 2.78
 -15 -3 -7 -2.83 -3.08
 15 3 7 -2.83 3.08
 -17 -3 -7 1.04 2.27
 17 3 7 1.04 -2.27
 -19 -3 -7 2.49 0.33
 19 3 7 2.49 -0.33
 -21 -3 -7 2.37 -0.45
 21 3 7 2.37 0.45
 -23 -3 -7 -3.46 -0.72
 32 -4 -7 -0.96 -1.51
 -32 -4 7 0.75 -1.88
 32 4 -7 0.75 1.88
 30 -4 -7 -1.93 -0.64
 -30 -4 7 1.26 -4.55
 30 4 -7 1.26 4.55
 28 -4 -7 4.21 -7.96
 -28 -4 7 -5.83 2.36
 28 4 -7 -5.83 -2.36
 28 4 -7 -5.83 -2.36
 -26 -4 7 -3.47 4.06
 26 -4 -7 3.64 -3.31
 26 -4 -7 3.64 -3.31
 26 4 -7 -3.47 -4.06
 26 4 -7 -3.47 -4.06
 -24 -4 7 -1.57 5.86
 24 -4 -7 1.44 -1.00
 24 -4 -7 1.44 -1.00
 24 4 -7 -1.57 -5.86
 24 4 -7 -1.57 -5.86
 22 -4 -7 2.15 -0.15
 22 -4 -7 2.15 -0.15
 22 4 -7 -2.78 0.10
 22 4 -7 -2.78 0.10
 20 -4 -7 1.59 -2.36
 20 -4 -7 1.59 -2.36
 20 4 -7 -3.00 0.81
 20 4 -7 -3.00 0.81
 18 -4 -7 5.39 -2.96
 18 -4 -7 5.39 -2.96
 -18 4 7 5.39 2.96
 18 4 -7 -4.25 -1.11
 18 4 -7 -4.25 -1.11
 16 -4 -7 4.37 -0.54
 16 -4 -7 4.37 -0.54
 -16 -4 7 -4.42 2.17
 16 4 -7 -4.42 -2.17
 16 4 -7 -4.42 -2.17
 -16 4 7 4.37 0.54
 14 -4 -7 -1.11 5.06
 14 4 -7 1.33 -7.85
 14 4 -7 1.33 -7.85
 -14 4 7 -1.11 -5.06
 12 -4 -7 0.35 3.41
 -12 -4 7 0.28 2.26
 12 -4 -7 0.35 3.41
 -12 4 7 0.35 -3.41
 12 4 -7 0.28 -2.26
 12 4 -7 0.28 -2.26
 10 -4 -7 -8.87 -0.17
 10 -4 -7 -8.87 -0.17
 -10 -4 7 10.32 1.11
 10 4 -7 10.32 -1.11
 10 4 -7 10.32 -1.11
 -10 4 7 -8.87 0.17
 -8 -4 7 -14.14 -11.15
 8 -4 -7 14.68 -8.49
 8 -4 -7 14.68 -8.49
 -8 4 7 14.68 8.49
 8 4 -7 -14.14 11.15
 8 4 -7 -14.14 11.15
 6 -4 -7 8.14 -0.15
 6 -4 -7 8.14 -0.15
 -6 4 7 8.14 0.15
 6 4 -7 -8.46 -0.76
 6 4 -7 -8.46 -0.76
 4 -4 -7 -1.84 -4.19
 4 -4 -7 -1.84 -4.19
 -4 -4 7 3.17 -1.91
 -4 4 7 -1.84 4.19
 4 4 -7 3.17 1.91
 4 4 -7 3.17 1.91
 2 -4 -7 -16.15 3.61
 -2 -4 7 15.82 -2.30
 2 -4 -7 -16.15 3.61
 2 4 -7 15.82 2.30
 -2 4 7 -16.15 -3.61
 2 4 -7 15.82 2.30
 0 -4 -7 -39.23 3.89
 0 -4 -7 -39.23 3.89
 0 -4 7 39.27 -1.28
 0 4 -7 39.27 1.28
 0 4 7 -39.23 -3.89
 0 4 -7 39.27 1.28
 2 -4 7 16.28 -5.84
 -2 -4 -7 -16.01 -6.11
 -2 -4 -7 -16.01 -6.11
 -2 4 -7 16.28 5.84
 -2 4 -7 16.28 5.84
 2 4 7 -16.01 6.11
 -4 -4 -7 -7.68 -7.09
 -4 -4 -7 -7.68 -7.09
 4 -4 7 7.13 -6.90
 4 4 7 -7.68 7.09
 -4 4 -7 7.13 6.90
 6 -4 7 -0.98 -5.07
 -6 -4 -7 1.59 -5.36
 -6 -4 -7 1.59 -5.36
 6 4 7 1.59 5.36
 -6 4 -7 -0.98 5.07
 8 -4 7 0.58 -2.61
 -8 -4 -7 -1.63 -1.85
 8 4 7 -1.63 1.85
 -10 -4 -7 -6.13 -4.09
 -10 -4 -7 -6.13 -4.09
 10 -4 7 5.42 -3.58
 10 4 7 -6.13 4.09
 -12 -4 -7 -3.67 0.46
 12 -4 7 3.27 -2.84
 -12 -4 -7 -3.67 0.46
 12 4 7 -3.67 -0.46
 -14 -4 -7 -0.26 1.49
 14 4 7 -0.26 -1.49
 -16 -4 -7 -0.25 -1.12
 16 4 7 -0.25 1.12
 -18 -4 -7 0.16 -3.34
 18 4 7 0.16 3.34
 -20 -4 -7 -0.54 -2.33
 20 4 7 -0.54 2.33
 -22 -4 -7 1.83 -4.60
 22 4 7 1.83 4.60
 -24 -4 -7 1.68 -2.30
 -31 -5 7 -0.99 2.53
 31 -5 -7 0.62 -0.13
 31 5 -7 -0.99 -2.53
 29 -5 -7 0.82 -1.27
 29 -5 -7 0.82 -1.27
 -29 -5 7 0.17 3.72
 29 5 -7 0.17 -3.72
 29 5 -7 0.17 -3.72
 -27 -5 7 6.02 -4.73
 27 -5 -7 -6.39 2.37
 27 -5 -7 -6.39 2.37
 27 5 -7 6.02 4.73
 27 5 -7 6.02 4.73
 25 -5 -7 -1.58 3.27
 25 -5 -7 -1.58 3.27
 -25 -5 7 1.48 -2.02
 25 5 -7 1.48 2.02
 25 5 -7 1.48 2.02
 -23 -5 7 4.11 0.69
 23 -5 -7 -4.12 2.29
 23 -5 -7 -4.12 2.29
 23 5 -7 4.11 -0.69
 23 5 -7 4.11 -0.69
 21 -5 -7 -3.84 5.52
 -21 -5 7 4.84 1.93
 21 -5 -7 -3.84 5.52
 21 5 -7 4.84 -1.93
 21 5 -7 4.84 -1.93
 19 -5 -7 -1.21 5.23
 -19 -5 7 -0.24 -0.84
 19 -5 -7 -1.21 5.23
 -19 5 7 -1.21 -5.23
 19 5 -7 -0.24 0.84
 19 5 -7 -0.24 0.84
 17 -5 -7 7.36 -1.27
 -17 -5 7 -8.06 1.86
 17 5 -7 -8.06 -1.86
 17 5 -7 -8.06 -1.86
 -17 5 7 7.36 1.27
 15 -5 -7 8.97 -1.49
 -15 5 7 8.97 1.49
 15 5 -7 -9.19 1.15
 15 5 -7 -9.19 1.15
 13 -5 -7 2.92 2.37
 -13 -5 7 -3.54 0.47
 -13 5 7 2.92 -2.37
 13 5 -7 -3.54 -0.47
 13 5 -7 -3.54 -0.47
 -11 -5 7 -3.51 -1.95
 11 -5 -7 3.07 -4.29
 11 -5 -7 3.07 -4.29
 -11 5 7 3.07 4.29
 11 5 -7 -3.51 1.95
 11 5 -7 -3.51 1.95
 9 -5 -7 -10.63 -1.85
 -9 -5 7 8.61 5.83
 9 -5 -7 -10.63 -1.85
 9 5 -7 8.61 -5.83
 -9 5 7 -10.63 1.85
 9 5 -7 8.61 -5.83
 -7 -5 7 -1.97 2.04
 7 -5 -7 1.67 -1.18
 7 -5 -7 1.67 -1.18
 7 5 -7 -1.97 -2.04
 7 5 -7 -1.97 -2.04
 -7 5 7 1.67 1.18
 5 -5 -7 -9.47 -0.96
 -5 -5 7 9.09 4.17
 5 -5 -7 -9.47 -0.96
 -5 5 7 -9.47 0.96
 5 5 -7 9.09 -4.17
 5 5 -7 9.09 -4.17
 3 -5 -7 -5.15 4.37
 -3 -5 7 5.58 3.38
 3 -5 -7 -5.15 4.37
 -3 -5 7 5.58 3.38
 -3 5 7 -5.15 -4.37
 3 5 -7 5.58 -3.38
 3 5 -7 5.58 -3.38
 -1 -5 7 0.83 -2.74
 1 -5 -7 0.53 -4.92
 1 -5 -7 0.53 -4.92
 1 5 -7 0.83 2.74
 1 5 -7 0.83 2.74
 -1 5 7 0.53 4.92
 -1 -5 -7 22.45 4.17
 -1 -5 -7 22.45 4.17
 -1 5 -7 -22.28 -0.47
 1 5 7 22.45 -4.17
 -1 5 -7 -22.28 -0.47
 -3 -5 -7 8.78 -4.41
 -3 -5 -7 8.78 -4.41
 3 5 7 8.78 4.41
 -3 5 -7 -7.92 3.65
 -5 -5 -7 3.78 0.06
 -5 -5 -7 3.78 0.06
 -5 5 -7 -2.99 -1.08
 5 5 7 3.78 -0.06
 -5 5 -7 -2.99 -1.08
 7 -5 7 2.66 -0.59
 -7 -5 -7 -1.92 -4.91
 -7 -5 -7 -1.92 -4.91
 -7 5 -7 2.66 0.59
 7 5 7 -1.92 4.91
 9 -5 7 2.43 -0.26
 -9 -5 -7 -0.92 0.19
 9 5 7 -0.92 -0.19
 -11 -5 -7 8.21 0.68
 11 -5 7 -8.53 0.16
 -11 -5 -7 8.21 0.68
 11 5 7 8.21 -0.68
 -13 -5 -7 6.05 1.04
 -13 -5 -7 6.05 1.04
 13 5 7 6.05 -1.04
 -15 -5 -7 3.58 -1.83
 15 5 7 3.58 1.83
 -17 -5 -7 2.33 4.20
 17 5 7 2.33 -4.20
 -19 -5 -7 -1.28 2.87
 19 5 7 -1.28 -2.87
 -21 -5 -7 -3.74 5.18
 21 5 7 -3.74 -5.18
 -23 -5 -7 -2.37 6.14
 23 5 7 -2.37 -6.14
 32 -6 -7 2.20 0.06
 -32 -6 7 -2.34 0.04
 32 6 -7 -2.34 -0.04
 30 -6 -7 1.16 2.57
 30 -6 -7 1.16 2.57
 -30 -6 7 -1.24 -0.55
 30 6 -7 -1.24 0.55
 30 6 -7 -1.24 0.55
 -28 -6 7 -2.68 1.37
 28 -6 -7 2.53 3.18
 28 -6 -7 2.53 3.18
 28 6 -7 -2.68 -1.37
 28 6 -7 -2.68 -1.37
 -26 -6 7 -0.99 1.57
 26 -6 -7 0.80 0.03
 26 -6 -7 0.80 0.03
 26 6 -7 -0.99 -1.57
 26 6 -7 -0.99 -1.57
 -24 -6 7 1.16 -2.99
 24 -6 -7 -1.28 -0.71
 24 -6 -7 -1.28 -0.71
 24 6 -7 1.16 2.99
 24 6 -7 1.16 2.99
 -22 -6 7 -2.13 -2.06
 22 -6 -7 1.18 -4.39
 22 -6 -7 1.18 -4.39
 22 6 -7 -2.13 2.06
 22 6 -7 -2.13 2.06
 20 -6 -7 1.81 -6.54
 20 -6 -7 1.81 -6.54
 -20 -6 7 -1.47 0.94
 20 6 -7 -1.47 -0.94
 20 6 -7 -1.47 -0.94
 18 -6 -7 -3.98 -1.45
 -18 -6 7 4.35 0.35
 18 -6 -7 -3.98 -1.45
 18 6 -7 4.35 -0.35
 18 6 -7 4.35 -0.35
 -18 6 7 -3.98 1.45
 16 -6 -7 -5.82 -1.21
 16 6 -7 5.31 -0.56
 -16 6 7 -5.82 1.21
 16 6 -7 5.31 -0.56
 14 -6 -7 2.94 -2.32
 -14 6 7 2.94 2.32
 14 6 -7 -3.09 4.00
 14 6 -7 -3.09 4.00
 12 -6 -7 11.74 -1.42
 -12 -6 7 -11.70 0.60
 12 -6 -7 11.74 -1.42
 12 6 -7 -11.70 -0.60
 -12 6 7 11.74 1.42
 12 6 -7 -11.70 -0.60
 10 -6 -7 14.77 1.49
 -10 -6 7 -14.40 -3.88
 10 -6 -7 14.77 1.49
 10 6 -7 -14.40 3.88
 -10 6 7 14.77 -1.49
 10 6 -7 -14.40 3.88
 8 -6 -7 5.93 4.24
 8 -6 -7 5.93 4.24
 -8 -6 7 -4.60 1.75
 -8 6 7 5.93 -4.24
 8 6 -7 -4.60 -1.75
 8 6 -7 -4.60 -1.75
 6 -6 -7 3.53 2.33
 6 -6 -7 3.53 2.33
 -6 -6 7 -3.20 1.72
 6 6 -7 -3.20 -1.72
 -6 6 7 3.53 -2.33
 6 6 -7 -3.20 -1.72
 4 -6 -7 17.26 4.79
 -4 -6 7 -16.85 2.13
 4 -6 -7 17.26 4.79
 -4 -6 7 -16.85 2.13
 -4 6 7 17.26 -4.79
 4 6 -7 -16.85 -2.13
 4 6 -7 -16.85 -2.13
 2 -6 -7 20.19 11.32
 -2 -6 7 -20.94 5.15
 2 -6 -7 20.19 11.32
 -2 6 7 20.19 -11.32
 2 6 -7 -20.94 -5.15
 0 -6 -7 2.84 3.70
 0 -6 -7 2.84 3.70
 0 -6 7 -2.87 -0.44
 0 6 -7 -2.87 0.44
 0 6 7 2.84 -3.70
 -2 -6 -7 -8.92 4.16
 -2 -6 -7 -8.92 4.16
 2 -6 7 9.38 3.31
 2 6 7 -8.92 -4.16
 -2 6 -7 9.38 -3.31
 -4 -6 -7 -6.36 -2.09
 4 -6 7 5.47 -0.99
 -4 -6 -7 -6.36 -2.09
 4 6 7 -6.36 2.09
 -4 6 -7 5.47 0.99
 -4 6 -7 5.47 0.99
 -6 -6 -7 0.54 -3.90
 -6 -6 -7 0.54 -3.90
 6 -6 7 -0.41 -1.17
 -6 6 -7 -0.41 1.17
 6 6 7 0.54 3.90
 -6 6 -7 -0.41 1.17
 -8 -6 -7 4.12 2.92
 -8 -6 -7 4.12 2.92
 8 -6 7 -5.60 0.99
 8 6 7 4.12 -2.92
 -8 6 -7 -5.60 -0.99
 -8 6 -7 -5.60 -0.99
 10 -6 7 -0.34 4.92
 -10 -6 -7 -0.25 1.79
 -10 -6 -7 -0.25 1.79
 10 6 7 -0.25 -1.79
 -10 6 -7 -0.34 -4.92
 12 -6 7 2.24 -2.11
 -12 -6 -7 -2.29 -2.89
 -12 -6 -7 -2.29 -2.89
 12 6 7 -2.29 2.89
 -14 -6 -7 -5.37 3.78
 -14 -6 -7 -5.37 3.78
 14 6 7 -5.37 -3.78
 -16 -6 -7 -4.60 0.19
 16 6 7 -4.60 -0.19
 -18 -6 -7 -2.75 -2.59
 18 6 7 -2.75 2.59
 -20 -6 -7 2.76 -2.48
 20 6 7 2.76 2.48
 -22 -6 -7 2.24 -3.96
 22 6 7 2.24 3.96
 31 -7 -7 -0.62 2.54
 -31 -7 7 0.99 -3.37
 31 -7 -7 -0.62 2.54
 31 7 -7 0.99 3.37
 31 7 -7 0.99 3.37
 29 -7 -7 -1.99 2.91
 -29 -7 7 1.63 -6.83
 29 -7 -7 -1.99 2.91
 29 7 -7 1.63 6.83
 29 7 -7 1.63 6.83
 27 -7 -7 2.38 3.15
 27 -7 -7 2.38 3.15
 -27 -7 7 -1.20 -4.15
 27 7 -7 -1.20 4.15
 27 7 -7 -1.20 4.15
 -25 -7 7 -6.10 0.08
 25 -7 -7 6.62 0.74
 25 -7 -7 6.62 0.74
 25 7 -7 -6.10 -0.08
 25 7 -7 -6.10 -0.08
 -23 -7 7 -3.00 1.58
 23 -7 -7 3.14 4.40
 23 -7 -7 3.14 4.40
 23 7 -7 -3.00 -1.58
 23 7 -7 -3.00 -1.58
 21 -7 -7 0.80 5.95
 21 -7 -7 0.80 5.95
 -21 -7 7 -0.57 -0.67
 21 7 -7 -0.57 0.67
 21 7 -7 -0.57 0.67
 -19 -7 7 -0.83 -1.98
 19 -7 -7 0.94 4.65
 19 -7 -7 0.94 4.65
 19 7 -7 -0.83 1.98
 19 7 -7 -0.83 1.98
 -17 -7 7 -2.18 -6.00
 17 -7 -7 2.75 6.09
 17 -7 -7 2.75 6.09
 17 7 -7 -2.18 6.00
 -17 7 7 2.75 -6.09
 17 7 -7 -2.18 6.00
 15 -7 -7 3.97 1.12
 -15 7 7 3.97 -1.12
 15 7 -7 -3.15 -0.91
 15 7 -7 -3.15 -0.91
 13 -7 -7 1.92 -1.65
 13 7 -7 -2.71 1.23
 -13 7 7 1.92 1.65
 13 7 -7 -2.71 1.23
 11 -7 -7 1.83 0.63
 -11 -7 7 -1.50 2.08
 11 -7 -7 1.83 0.63
 -11 7 7 1.83 -0.63
 11 7 -7 -1.50 -2.08
 11 7 -7 -1.50 -2.08
 9 -7 -7 8.42 1.61
 -9 -7 7 -8.53 -1.49
 9 -7 -7 8.42 1.61
 9 7 -7 -8.53 1.49
 9 7 -7 -8.53 1.49
 -9 7 7 8.42 -1.61
 -7 -7 7 -6.09 -0.56
 7 -7 -7 5.85 0.97
 7 -7 -7 5.85 0.97
 -7 7 7 5.85 -0.97
 7 7 -7 -6.09 0.56
 7 7 -7 -6.09 0.56
 5 -7 -7 2.01 5.38
 -5 -7 7 -3.04 -4.67
 -5 -7 7 -3.04 -4.67
 5 -7 -7 2.01 5.38
 5 7 -7 -3.04 4.67
 -5 7 7 2.01 -5.38
 5 7 -7 -3.04 4.67
 -3 -7 7 16.50 1.38
 3 -7 -7 -16.62 0.90
 3 -7 -7 -16.62 0.90
 3 7 -7 16.50 -1.38
 -3 7 7 -16.62 -0.90
 1 -7 -7 -3.86 2.23
 -1 -7 7 4.53 6.35
 1 -7 -7 -3.86 2.23
 1 7 -7 4.53 -6.35
 -1 7 7 -3.86 -2.23
 -1 -7 -7 4.85 -0.64
 1 -7 7 -5.94 0.50
 -1 -7 -7 4.85 -0.64
 -1 7 -7 -5.94 -0.50
 1 7 7 4.85 0.64
 -3 -7 -7 10.40 6.15
 -3 -7 -7 10.40 6.15
 3 -7 7 -9.88 2.56
 3 7 7 10.40 -6.15
 -3 7 -7 -9.88 -2.56
 -3 7 -7 -9.88 -2.56
 5 -7 7 -4.26 1.31
 -5 -7 -7 4.49 7.08
 -5 -7 -7 4.49 7.08
 -5 7 -7 -4.26 -1.31
 -5 7 -7 -4.26 -1.31
 5 7 7 4.49 -7.08
 -7 -7 -7 -4.75 1.13
 7 -7 7 5.32 -2.85
 -7 -7 -7 -4.75 1.13
 -7 7 -7 5.32 2.85
 7 7 7 -4.75 -1.13
 -7 7 -7 5.32 2.85
 -9 -7 -7 -4.02 -10.98
 9 -7 7 5.13 -11.36
 -9 -7 -7 -4.02 -10.98
 -9 7 -7 5.13 11.36
 9 7 7 -4.02 10.98
 -9 7 -7 5.13 11.36
 -11 -7 -7 -6.03 1.87
 11 -7 7 6.19 -2.28
 -11 -7 -7 -6.03 1.87
 -11 7 -7 6.19 2.28
 11 7 7 -6.03 -1.87
 -13 -7 -7 -0.04 -3.24
 -13 -7 -7 -0.04 -3.24
 -13 7 -7 0.05 1.18
 13 7 7 -0.04 3.24
 -15 -7 -7 2.09 -2.93
 15 7 7 2.09 2.93
 -15 7 -7 -2.46 1.56
 -17 -7 -7 2.16 -2.40
 17 7 7 2.16 2.40
 -17 7 -7 -2.98 -4.17
 -19 -7 -7 1.46 3.24
 -19 7 -7 -0.54 -0.69
 19 7 7 1.46 -3.24
 -21 -7 -7 0.19 2.76
 21 7 7 0.19 -2.76
 -21 7 -7 0.14 3.74
 30 -8 -7 -0.79 -5.05
 -30 -8 7 0.91 5.34
 30 -8 -7 -0.79 -5.05
 30 8 -7 0.91 -5.34
 28 -8 -7 -1.94 -7.23
 -28 -8 7 1.83 8.52
 28 -8 -7 -1.94 -7.23
 28 8 -7 1.83 -8.52
 28 8 -7 1.83 -8.52
 -26 -8 7 2.68 3.48
 26 -8 -7 -4.17 -4.78
 26 -8 -7 -4.17 -4.78
 26 8 -7 2.68 -3.48
 26 8 -7 2.68 -3.48
 24 -8 -7 -1.43 -4.71
 -24 -8 7 1.21 -0.89
 24 -8 -7 -1.43 -4.71
 24 8 -7 1.21 0.89
 24 8 -7 1.21 0.89
 -22 -8 7 -4.69 -1.68
 22 -8 -7 3.93 -4.02
 22 -8 -7 3.93 -4.02
 22 8 -7 -4.69 1.68
 22 8 -7 -4.69 1.68
 20 -8 -7 4.25 -0.24
 20 -8 -7 4.25 -0.24
 -20 -8 7 -3.91 -2.43
 20 8 -7 -3.91 2.43
 20 8 -7 -3.91 2.43
 -18 -8 7 -6.33 1.06
 18 -8 -7 4.96 -1.05
 18 -8 -7 4.96 -1.05
 18 8 -7 -6.33 -1.06
 18 8 -7 -6.33 -1.06
 -16 -8 7 -2.95 -2.56
 16 -8 -7 2.28 -1.66
 16 -8 -7 2.28 -1.66
 16 8 -7 -2.95 2.56
 16 8 -7 -2.95 2.56
 -16 8 7 2.28 1.66
 -14 -8 7 0.93 -2.92
 14 -8 -7 -1.47 1.70
 14 -8 -7 -1.47 1.70
 14 8 -7 0.93 2.92
 14 8 -7 0.93 2.92
 -12 -8 7 5.63 -1.92
 12 -8 -7 -5.06 0.51
 12 8 -7 5.63 1.92
 12 8 -7 5.63 1.92
 -12 8 7 -5.06 -0.51
 10 -8 -7 -3.46 0.27
 -10 -8 7 3.22 -1.56
 10 -8 -7 -3.46 0.27
 10 8 -7 3.22 1.56
 -10 8 7 -3.46 -0.27
 10 8 -7 3.22 1.56
 -8 -8 7 4.53 1.65
 8 -8 -7 -3.69 0.15
 8 -8 -7 -3.69 0.15
 8 8 -7 4.53 -1.65
 -8 8 7 -3.69 -0.15
 -6 -8 7 7.24 -0.86
 6 -8 -7 -7.56 2.78
 6 -8 -7 -7.56 2.78
 -6 8 7 -7.56 -2.78
 6 8 -7 7.24 0.86
 4 -8 -7 1.32 -5.53
 4 -8 -7 1.32 -5.53
 -4 -8 7 -0.44 -2.53
 4 8 -7 -0.44 2.53
 -4 8 7 1.32 5.53
 2 -8 -7 5.05 -15.28
 -2 -8 7 -5.97 -13.45
 2 -8 -7 5.05 -15.28
 -2 8 7 5.05 15.28
 0 -8 -7 0.60 -1.70
 0 -8 7 -0.32 -3.87
 0 -8 -7 0.60 -1.70
 0 8 7 0.60 1.70
 -2 -8 -7 -0.92 0.97
 2 -8 7 1.83 0.17
 -2 -8 -7 -0.92 0.97
 2 8 7 -0.92 -0.97
 -2 8 -7 1.83 -0.17
 -4 -8 -7 -3.45 0.57
 4 -8 7 2.71 -3.37
 -4 -8 -7 -3.45 0.57
 4 8 7 -3.45 -0.57
 -4 8 -7 2.71 3.37
 6 -8 7 3.08 0.51
 -6 -8 -7 -3.21 2.60
 -6 -8 -7 -3.21 2.60
 6 8 7 -3.21 -2.60
 -6 8 -7 3.08 -0.51
 8 -8 7 -5.56 8.56
 -8 -8 -7 4.87 10.54
 -8 -8 -7 4.87 10.54
 -8 8 -7 -5.56 -8.56
 8 8 7 4.87 -10.54
 -10 -8 -7 9.40 4.97
 10 -8 7 -10.11 3.12
 -10 -8 -7 9.40 4.97
 -10 8 -7 -10.11 -3.12
 10 8 7 9.40 -4.97
 -12 -8 -7 8.00 -0.89
 -12 -8 -7 8.00 -0.89
 12 8 7 8.00 0.89
 -12 8 -7 -8.31 -2.18
 -14 -8 -7 4.55 5.39
 -14 -8 -7 4.55 5.39
 14 8 7 4.55 -5.39
 -14 8 -7 -4.51 1.07
 -16 -8 -7 -0.35 7.35
 -16 8 -7 1.45 5.56
 16 8 7 -0.35 -7.35
 -18 -8 -7 -1.89 5.98
 18 8 7 -1.89 -5.98
 -18 8 -7 1.72 5.92
 -20 -8 -7 -3.25 0.16
 20 8 7 -3.25 -0.16
 -20 8 -7 2.52 1.47
 29 -9 -7 -0.04 5.34
 -29 -9 7 0.99 -5.22
 29 9 -7 0.99 5.22
 27 -9 -7 1.85 7.97
 27 -9 -7 1.85 7.97
 -27 -9 7 -1.13 -9.45
 27 9 -7 -1.13 9.45
 -25 -9 7 2.37 -6.27
 25 -9 -7 -1.53 5.48
 25 -9 -7 -1.53 5.48
 25 9 -7 2.37 6.27
 -23 -9 7 2.88 -1.96
 23 -9 -7 -2.54 4.27
 23 -9 -7 -2.54 4.27
 23 9 -7 2.88 1.96
 23 9 -7 2.88 1.96
 -21 -9 7 3.70 2.10
 21 -9 -7 -4.09 -1.43
 21 -9 -7 -4.09 -1.43
 21 9 -7 3.70 -2.10
 21 9 -7 3.70 -2.10
 19 -9 -7 -3.93 -0.59
 19 -9 -7 -3.93 -0.59
 -19 -9 7 2.97 -0.10
 19 9 -7 2.97 0.10
 19 9 -7 2.97 0.10
 -17 -9 7 4.30 0.11
 17 -9 -7 -4.06 -0.30
 17 -9 -7 -4.06 -0.30
 17 9 -7 4.30 -0.11
 17 9 -7 4.30 -0.11
 -15 -9 7 -0.14 0.60
 15 -9 -7 -0.43 3.78
 15 -9 -7 -0.43 3.78
 15 9 -7 -0.14 -0.60
 15 9 -7 -0.14 -0.60
 -15 9 7 -0.43 -3.78
 13 -9 -7 1.96 1.63
 -13 -9 7 -2.07 -2.56
 13 -9 -7 1.96 1.63
 -13 9 7 1.96 -1.63
 13 9 -7 -2.07 2.56
 11 -9 -7 -0.42 0.38
 11 -9 -7 -0.42 0.38
 -11 -9 7 0.05 2.87
 -11 9 7 -0.42 -0.38
 11 9 -7 0.05 -2.87
 -9 -9 7 3.94 2.69
 9 -9 -7 -4.59 1.78
 9 -9 -7 -4.59 1.78
 9 9 -7 3.94 -2.69
 -9 9 7 -4.59 -1.78
 7 -9 -7 2.74 -0.81
 7 -9 -7 2.74 -0.81
 -7 -9 7 -1.60 1.32
 7 9 -7 -1.60 -1.32
 -7 9 7 2.74 0.81
 5 -9 -7 1.89 -3.94
 5 -9 -7 1.89 -3.94
 -5 -9 7 -1.28 3.23
 -5 9 7 1.89 3.94
 3 -9 -7 3.10 8.52
 3 -9 -7 3.10 8.52
 -3 -9 7 -3.77 8.37
 -3 9 7 3.10 -8.52
 1 -9 -7 -0.99 6.90
 -1 -9 7 1.27 5.41
 1 -9 -7 -0.99 6.90
 1 9 -7 1.27 -5.41
 -1 9 7 -0.99 -6.90
 -1 -9 -7 -2.98 1.62
 -1 -9 -7 -2.98 1.62
 1 -9 7 2.43 3.96
 -1 9 -7 2.43 -3.96
 1 9 7 -2.98 -1.62
 -3 -9 -7 -2.01 0.43
 3 -9 7 3.36 6.16
 -3 -9 -7 -2.01 0.43
 3 9 7 -2.01 -0.43
 -3 9 -7 3.36 -6.16
 -5 -9 -7 3.59 7.56
 -5 -9 -7 3.59 7.56
 5 -9 7 -2.65 4.90
 -5 9 -7 -2.65 -4.90
 5 9 7 3.59 -7.56
 7 -9 7 -4.21 -1.89
 -7 -9 -7 4.84 -1.26
 -7 -9 -7 4.84 -1.26
 -7 9 -7 -4.21 1.89
 7 9 7 4.84 1.26
 9 -9 7 1.20 -1.74
 -9 -9 -7 -0.53 -3.07
 -9 -9 -7 -0.53 -3.07
 -9 9 -7 1.20 1.74
 9 9 7 -0.53 3.07
 -11 -9 -7 -2.58 2.09
 -11 -9 -7 -2.58 2.09
 11 -9 7 3.86 -2.85
 -11 9 -7 3.86 2.85
 11 9 7 -2.58 -2.09
 -13 -9 -7 -7.66 4.55
 -13 -9 -7 -7.66 4.55
 -13 9 -7 8.95 5.09
 13 9 7 -7.66 -4.55
 -15 -9 -7 -2.34 -4.07
 -15 9 -7 2.13 -2.65
 15 9 7 -2.34 4.07
 -17 -9 -7 0.38 -4.89
 -17 9 -7 -1.21 -3.50
 17 9 7 0.38 4.89
 -19 -9 -7 0.47 -4.74
 19 9 7 0.47 4.74
 -19 9 -7 -0.25 -5.02
 28 -10 -7 -0.08 -5.16
 -28 -10 7 0.59 5.61
 28 10 -7 0.59 -5.61
 -26 -10 7 0.90 6.45
 26 -10 -7 -0.80 -3.77
 26 10 -7 0.90 -6.45
 24 -10 -7 -0.52 -0.75
 -24 -10 7 -0.10 6.50
 24 10 -7 -0.10 -6.50
 22 -10 -7 -0.29 2.72
 -22 -10 7 0.03 -3.15
 22 -10 -7 -0.29 2.72
 22 10 -7 0.03 3.15
 -20 -10 7 -1.46 -0.51
 20 -10 -7 1.19 2.28
 20 -10 -7 1.19 2.28
 20 10 -7 -1.46 0.51
 18 -10 -7 -0.21 -1.44
 -18 -10 7 0.67 -0.76
 18 -10 -7 -0.21 -1.44
 18 10 -7 0.67 0.76
 16 -10 -7 0.59 -0.45
 -16 -10 7 -0.68 4.06
 16 -10 -7 0.59 -0.45
 16 10 -7 -0.68 -4.06
 14 -10 -7 -3.22 -3.43
 -14 -10 7 3.84 4.89
 14 -10 -7 -3.22 -3.43
 14 10 -7 3.84 -4.89
 -14 10 7 -3.22 3.43
 12 -10 -7 -3.22 2.95
 12 -10 -7 -3.22 2.95
 -12 -10 7 3.51 6.90
 -12 10 7 -3.22 -2.95
 12 10 -7 3.51 -6.90
 10 -10 -7 3.35 0.27
 10 -10 -7 3.35 0.27
 -10 -10 7 -2.99 1.22
 10 10 -7 -2.99 -1.22
 -10 10 7 3.35 -0.27
 8 -10 -7 0.45 -1.26
 8 -10 -7 0.45 -1.26
 -8 -10 7 -1.00 0.02
 8 10 -7 -1.00 -0.02
 -8 10 7 0.45 1.26
 -6 -10 7 -3.85 1.39
 6 -10 -7 2.59 3.98
 6 -10 -7 2.59 3.98
 -6 10 7 2.59 -3.98
 6 10 -7 -3.85 -1.39
 -4 -10 7 0.90 -2.20
 4 -10 -7 -0.20 -0.18
 4 -10 -7 -0.20 -0.18
 -4 10 7 -0.20 0.18
 4 10 -7 0.90 2.20
 -2 -10 7 1.76 0.44
 2 -10 -7 -0.95 2.65
 2 -10 -7 -0.95 2.65
 2 10 -7 1.76 -0.44
 -2 10 7 -0.95 -2.65
 0 -10 7 -2.40 0.69
 0 -10 -7 2.56 -3.00
 0 -10 -7 2.56 -3.00
 0 10 -7 -2.40 -0.69
 0 10 7 2.56 3.00
 2 -10 7 -4.36 -9.07
 -2 -10 -7 4.65 3.09
 -2 -10 -7 4.65 3.09
 -2 10 -7 -4.36 9.07
 2 10 7 4.65 -3.09
 -4 -10 -7 2.90 -4.71
 4 -10 7 -3.91 -5.51
 -4 -10 -7 2.90 -4.71
 -4 10 -7 -3.91 5.51
 4 10 7 2.90 4.71
 -6 -10 -7 -2.53 -6.48
 -6 -10 -7 -2.53 -6.48
 6 -10 7 3.55 -2.19
 -6 10 -7 3.55 2.19
 6 10 7 -2.53 6.48
 -8 -10 -7 -5.59 3.24
 -8 -10 -7 -5.59 3.24
 8 -10 7 5.25 -3.19
 8 10 7 -5.59 -3.24
 -8 10 -7 5.25 3.19
 -10 -10 -7 -6.52 5.27
 -10 -10 -7 -6.52 5.27
 10 -10 7 7.09 -1.73
 -10 10 -7 7.09 1.73
 10 10 7 -6.52 -5.27
 -12 -10 -7 -0.40 0.22
 -12 -10 -7 -0.40 0.22
 -12 10 -7 -0.57 1.56
 12 10 7 -0.40 -0.22
 -14 -10 -7 1.16 1.32
 -14 -10 -7 1.16 1.32
 14 10 7 1.16 -1.32
 -14 10 -7 -1.24 1.95
 -16 -10 -7 1.48 5.25
 16 10 7 1.48 -5.25
 -16 10 -7 -1.14 4.84
 -18 -10 -7 1.35 5.04
 -18 10 -7 -1.00 4.99
 18 10 7 1.35 -5.04
 27 -11 -7 0.29 0.98
 -27 -11 7 -0.61 -1.82
 27 11 -7 -0.61 1.82
 -25 -11 7 -0.71 -3.46
 25 -11 -7 1.51 -1.67
 25 11 -7 -0.71 3.46
 23 -11 -7 1.36 -3.19
 -23 -11 7 -1.24 -2.17
 23 11 -7 -1.24 2.17
 21 -11 -7 -2.94 -1.48
 -21 -11 7 2.88 1.93
 21 11 -7 2.88 -1.93
 19 -11 -7 -0.21 1.40
 -19 -11 7 -0.94 -0.07
 19 11 -7 -0.94 0.07
 -17 -11 7 3.16 4.73
 17 -11 -7 -3.48 5.27
 17 -11 -7 -3.48 5.27
 17 11 -7 3.16 -4.73
 -15 -11 7 1.28 0.54
 15 -11 -7 -2.03 3.86
 15 -11 -7 -2.03 3.86
 15 11 -7 1.28 -0.54
 -13 -11 7 0.09 2.26
 13 -11 -7 -0.77 6.87
 13 -11 -7 -0.77 6.87
 13 11 -7 0.09 -2.26
 -13 11 7 -0.77 -6.87
 11 -11 -7 -1.48 0.85
 -11 -11 7 1.55 -2.91
 11 -11 -7 -1.48 0.85
 11 11 -7 1.55 2.91
 -11 11 7 -1.48 -0.85
 9 -11 -7 -2.90 5.79
 9 -11 -7 -2.90 5.79
 -9 -11 7 3.47 -3.02
 9 11 -7 3.47 3.02
 -9 11 7 -2.90 -5.79
 7 -11 -7 -4.71 -3.75
 7 -11 -7 -4.71 -3.75
 -7 -11 7 5.14 -0.10
 7 11 -7 5.14 0.10
 -7 11 7 -4.71 3.75
 -5 -11 7 4.08 1.91
 5 -11 -7 -3.77 -2.16
 5 -11 -7 -3.77 -2.16
 -5 11 7 -3.77 2.16
 5 11 -7 4.08 -1.91
 3 -11 -7 -2.11 -2.47
 -3 -11 7 1.51 1.53
 3 -11 -7 -2.11 -2.47
 3 11 -7 1.51 -1.53
 -3 11 7 -2.11 2.47
 1 -11 -7 -1.47 -1.84
 -1 -11 7 2.02 -3.04
 1 -11 -7 -1.47 -1.84
 1 11 -7 2.02 3.04
 -1 11 7 -1.47 1.84
 1 -11 7 4.69 1.70
 -1 -11 -7 -4.89 -1.97
 -1 -11 -7 -4.89 -1.97
 -1 11 -7 4.69 -1.70
 1 11 7 -4.89 1.97
 -3 -11 -7 -5.30 -4.69
 -3 -11 -7 -5.30 -4.69
 3 -11 7 4.94 4.44
 3 11 7 -5.30 4.69
 -3 11 -7 4.94 -4.44
 -5 -11 -7 -1.05 2.63
 -5 -11 -7 -1.05 2.63
 5 -11 7 2.04 -1.24
 -5 11 -7 2.04 1.24
 5 11 7 -1.05 -2.63
 -7 -11 -7 -0.13 6.05
 7 -11 7 0.92 1.96
 -7 -11 -7 -0.13 6.05
 7 11 7 -0.13 -6.05
 -7 11 -7 0.92 -1.96
 -9 -11 -7 2.05 -1.13
 -9 -11 -7 2.05 -1.13
 9 -11 7 -0.80 3.75
 9 11 7 2.05 1.13
 -9 11 -7 -0.80 -3.75
 -11 -11 -7 3.06 -4.44
 -11 -11 -7 3.06 -4.44
 -11 11 -7 -3.13 -3.13
 11 11 7 3.06 4.44
 -13 -11 -7 1.88 -0.93
 -13 -11 -7 1.88 -0.93
 13 11 7 1.88 0.93
 -13 11 -7 -1.48 -1.03
 -15 -11 -7 -1.15 -1.15
 -15 11 -7 0.36 -0.31
 15 11 7 -1.15 1.15
 -17 -11 -7 -2.52 -4.17
 -17 11 -7 2.58 -4.13
 17 11 7 -2.52 4.17
 -24 -12 7 1.05 2.48
 24 -12 -7 -0.99 2.19
 24 12 -7 1.05 -2.48
 -22 -12 7 0.51 2.29
 22 -12 -7 -0.39 -1.18
 22 12 -7 0.51 -2.29
 20 -12 -7 -4.51 -2.12
 -20 -12 7 4.89 2.37
 20 12 -7 4.89 -2.37
 18 -12 -7 -1.76 -3.54
 -18 -12 7 1.45 -1.11
 18 12 -7 1.45 1.11
 16 -12 -7 -1.02 -3.87
 -16 -12 7 -0.55 -3.65
 16 12 -7 -0.55 3.65
 -14 -12 7 -3.94 0.84
 14 -12 -7 4.59 -2.94
 -14 12 7 4.59 2.94
 14 12 -7 -3.94 -0.84
 -12 -12 7 -3.74 0.59
 12 -12 -7 3.67 -2.41
 -12 12 7 3.67 2.41
 12 12 -7 -3.74 -0.59
 -10 -12 7 2.12 3.89
 10 -12 -7 -2.58 -1.46
 10 -12 -7 -2.58 -1.46
 10 12 -7 2.12 -3.89
 -10 12 7 -2.58 1.46
 8 -12 -7 0.88 -0.83
 8 -12 -7 0.88 -0.83
 -8 -12 7 -1.47 4.21
 8 12 -7 -1.47 -4.21
 -8 12 7 0.88 0.83
 6 -12 -7 2.10 5.21
 -6 -12 7 -2.26 -4.38
 6 -12 -7 2.10 5.21
 6 12 -7 -2.26 4.38
 -6 12 7 2.10 -5.21
 4 -12 -7 1.74 3.72
 4 -12 -7 1.74 3.72
 -4 -12 7 -0.82 -1.78
 4 12 -7 -0.82 1.78
 -4 12 7 1.74 -3.72
 -2 -12 7 1.23 1.11
 2 -12 -7 -1.63 1.96
 2 -12 -7 -1.63 1.96
 -2 12 7 -1.63 -1.96
 2 12 -7 1.23 -1.11
 0 -12 -7 1.40 1.32
 0 -12 -7 1.40 1.32
 0 -12 7 -1.62 2.73
 0 12 -7 -1.62 -2.73
 0 12 7 1.40 -1.32
 -2 -12 -7 1.74 1.31
 -2 -12 -7 1.74 1.31
 2 -12 7 -1.89 0.34
 -2 12 -7 -1.89 -0.34
 2 12 7 1.74 -1.31
 4 -12 7 2.64 4.39
 -4 -12 -7 -2.21 3.21
 -4 -12 -7 -2.21 3.21
 -4 12 -7 2.64 -4.39
 4 12 7 -2.21 -3.21
 -6 -12 -7 -1.26 -7.04
 6 -12 7 -0.83 4.52
 -6 -12 -7 -1.26 -7.04
 6 12 7 -1.26 7.04
 -6 12 -7 -0.83 -4.52
 -8 -12 -7 3.31 -4.94
 8 -12 7 -2.59 1.44
 -8 -12 -7 3.31 -4.94
 -8 12 -7 -2.59 -1.44
 8 12 7 3.31 4.94
 -10 -12 -7 1.02 3.47
 10 -12 7 -1.96 -1.42
 -10 -12 -7 1.02 3.47
 10 12 7 1.02 -3.47
 -10 12 -7 -1.96 1.42
 -12 -12 -7 -3.00 2.29
 -12 -12 -7 -3.00 2.29
 12 12 7 -3.00 -2.29
 -12 12 -7 3.10 -3.31
 -14 -12 -7 0.90 -2.78
 -14 12 -7 -0.91 -4.99
 14 12 7 0.90 2.78
 -16 -12 -7 -0.22 0.44
 16 12 7 -0.22 -0.44
 -16 12 -7 0.88 -0.48
 -23 -13 7 2.00 1.60
 23 -13 -7 -1.90 -0.08
 23 13 -7 2.00 -1.60
 21 -13 -7 2.47 1.00
 -21 -13 7 -1.45 -0.95
 21 13 -7 -1.45 0.95
 -19 -13 7 -1.22 1.78
 19 -13 -7 2.29 1.15
 19 13 -7 -1.22 -1.78
 -17 -13 7 -1.78 2.18
 17 -13 -7 3.76 -3.22
 17 13 -7 -1.78 -2.18
 15 -13 -7 -4.55 -1.86
 -15 -13 7 4.88 1.58
 15 13 -7 4.88 -1.58
 -13 -13 7 1.72 -5.09
 13 -13 -7 -2.85 -3.08
 13 13 -7 1.72 5.09
 -13 13 7 -2.85 3.08
 -11 -13 7 -1.97 -3.75
 11 -13 -7 0.92 -0.11
 -11 13 7 0.92 0.11
 11 13 -7 -1.97 3.75
 9 -13 -7 6.52 -1.00
 -9 -13 7 -6.33 -3.07
 -9 13 7 6.52 1.00
 9 13 -7 -6.33 3.07
 -7 -13 7 -1.48 -0.79
 7 -13 -7 1.38 3.70
 -7 13 7 1.38 -3.70
 7 13 -7 -1.48 0.79
 5 -13 -7 -0.78 -1.63
 -5 -13 7 -0.14 4.20
 -5 13 7 -0.78 1.63
 5 13 -7 -0.14 -4.20
 3 -13 -7 2.24 0.12
 -3 -13 7 -2.74 -0.22
 -3 13 7 2.24 -0.12
 3 13 -7 -2.74 0.22
 1 -13 -7 1.01 -0.49
 1 -13 -7 1.01 -0.49
 -1 -13 7 -0.92 -2.04
 1 13 -7 -0.92 2.04
 -1 13 7 1.01 0.49
 -1 -13 -7 -0.38 -0.33
 1 -13 7 0.66 -0.86
 -1 -13 -7 -0.38 -0.33
 -1 13 -7 0.66 0.86
 1 13 7 -0.38 0.33
 3 -13 7 -1.55 -1.04
 -3 -13 -7 1.07 -3.92
 -3 -13 -7 1.07 -3.92
 -3 13 -7 -1.55 1.04
 3 13 7 1.07 3.92
 5 -13 7 -3.07 -0.29
 -5 -13 -7 3.42 0.49
 -5 -13 -7 3.42 0.49
 5 13 7 3.42 -0.49
 -5 13 -7 -3.07 0.29
 7 -13 7 -1.66 -3.42
 -7 -13 -7 0.33 2.25
 -7 -13 -7 0.33 2.25
 -7 13 -7 -1.66 3.42
 7 13 7 0.33 -2.25
 -9 -13 -7 -3.05 -1.97
 9 -13 7 2.35 3.03
 -9 -13 -7 -3.05 -1.97
 9 13 7 -3.05 1.97
 -9 13 -7 2.35 -3.03
 -11 -13 -7 0.43 -0.02
 -11 -13 -7 0.43 -0.02
 11 13 7 0.43 0.02
 -11 13 -7 -0.09 3.29
 -13 -13 -7 -0.74 1.89
 -13 -13 -7 -0.74 1.89
 -13 13 -7 1.59 3.39
 13 13 7 -0.74 -1.89
 -20 -14 7 -0.22 -0.64
 20 -14 -7 -0.60 -2.18
 20 14 -7 -0.22 0.64
 -18 -14 7 0.63 0.54
 18 -14 -7 -1.89 0.68
 18 14 -7 0.63 -0.54
 -16 -14 7 -2.50 -4.60
 16 -14 -7 0.97 4.69
 16 14 -7 -2.50 4.60
 14 -14 -7 1.96 2.72
 -14 -14 7 -1.46 1.05
 14 14 -7 -1.46 -1.05
 -12 -14 7 2.08 1.77
 12 -14 -7 -2.21 -0.12
 12 14 -7 2.08 -1.77
 -10 -14 7 2.46 3.26
 10 -14 -7 -1.97 1.55
 -10 14 7 -1.97 -1.55
 10 14 -7 2.46 -3.26
 8 -14 -7 -5.06 -3.85
 -8 -14 7 4.53 2.14
 -8 14 7 -5.06 3.85
 8 14 -7 4.53 -2.14
 -6 -14 7 0.69 2.30
 6 -14 -7 0.64 -5.69
 6 14 -7 0.69 -2.30
 -6 14 7 0.64 5.69
 -4 -14 7 2.17 -2.78
 4 -14 -7 -0.89 -5.89
 4 14 -7 2.17 2.78
 -4 14 7 -0.89 5.89
 2 -14 -7 -0.45 -4.43
 -2 -14 7 1.42 0.03
 -2 14 7 -0.45 4.43
 2 14 -7 1.42 -0.03
 0 -14 -7 0.74 -0.33
 0 -14 7 -0.44 4.44
 0 14 -7 -0.44 -4.44
 0 14 7 0.74 0.33
 -2 -14 -7 1.55 2.12
 2 -14 7 -0.46 4.48
 -2 14 -7 -0.46 -4.48
 2 14 7 1.55 -2.12
 4 -14 7 -0.05 0.25
 -4 -14 -7 0.08 2.27
 -4 14 -7 -0.05 -0.25
 4 14 7 0.08 -2.27
 -6 -14 -7 -0.93 3.94
 6 -14 7 2.55 5.24
 -6 14 -7 2.55 -5.24
 6 14 7 -0.93 -3.94
 -8 -14 -7 2.26 3.17
 8 -14 7 -2.63 -0.91
 -8 14 -7 -2.63 0.91
 8 14 7 2.26 -3.17
 -10 -14 -7 1.21 -2.99
 -10 -14 -7 1.21 -2.99
 -10 14 -7 -1.64 -1.47
 10 14 7 1.21 2.99
 -12 -14 -7 1.80 -3.57
 -12 -14 -7 1.80 -3.57
 -12 14 -7 -3.16 -1.88
 12 14 7 1.80 3.57
 17 -15 -7 -1.16 -2.83
 -17 -15 7 2.44 0.24
 17 15 -7 2.44 -0.24
 15 -15 -7 0.37 -6.39
 -15 -15 7 0.00 -0.76
 15 15 -7 0.00 0.76
 -13 -15 7 1.36 -2.66
 13 -15 -7 -2.47 -1.14
 13 15 -7 1.36 2.66
 -11 -15 7 -1.07 -0.66
 11 -15 -7 1.04 -1.83
 11 15 -7 -1.07 0.66
 -9 -15 7 -3.68 -1.39
 9 -15 -7 2.47 1.10
 9 15 -7 -3.68 1.39
 -9 15 7 2.47 -1.10
 -7 -15 7 -4.15 -4.15
 7 -15 -7 3.81 0.13
 7 15 -7 -4.15 4.15
 -7 15 7 3.81 -0.13
 5 -15 -7 2.21 5.81
 -5 -15 7 -4.39 1.11
 5 15 -7 -4.39 -1.11
 -5 15 7 2.21 -5.81
 3 -15 -7 3.34 3.42
 -3 -15 7 -4.44 4.53
 -3 15 7 3.34 -3.42
 3 15 -7 -4.44 -4.53
 1 -15 -7 1.75 0.25
 -1 -15 7 -0.85 1.87
 1 15 -7 -0.85 -1.87
 -1 15 7 1.75 -0.25
 1 -15 7 -0.62 -3.24
 -1 -15 -7 0.83 0.28
 1 15 7 0.83 -0.28
 -1 15 -7 -0.62 3.24
 -3 -15 -7 -0.09 3.82
 3 -15 7 -0.41 0.87
 3 15 7 -0.09 -3.82
 -3 15 -7 -0.41 -0.87
 -5 -15 -7 0.63 -2.93
 5 -15 7 -1.87 -4.71
 5 15 7 0.63 2.93
 -5 15 -7 -1.87 4.71
 7 -15 7 0.98 -1.11
 -7 -15 -7 -2.07 -5.34
 -7 15 -7 0.98 1.11
 7 15 7 -2.07 5.34
 9 -15 7 2.28 -2.87
 -9 -15 -7 -1.77 -0.84
 -9 15 -7 2.28 2.87
 9 15 7 -1.77 0.84
 14 -16 -7 2.61 0.75
 -14 -16 7 -2.77 -0.11
 14 16 -7 -2.77 0.11
 12 -16 -7 4.81 -0.48
 -12 -16 7 -4.72 -1.18
 12 16 -7 -4.72 1.18
 10 -16 -7 -0.29 -3.38
 -10 -16 7 -0.10 -2.96
 10 16 -7 -0.10 2.96
 -8 -16 7 0.50 1.21
 8 -16 -7 -0.29 -1.02
 -8 16 7 -0.29 1.02
 8 16 -7 0.50 -1.21
 6 -16 -7 -3.16 -0.71
 -6 -16 7 3.46 4.07
 -6 16 7 -3.16 0.71
 6 16 -7 3.46 -4.07
 4 -16 -7 -3.15 -3.53
 -4 -16 7 4.35 0.46
 -4 16 7 -3.15 3.53
 4 16 -7 4.35 -0.46
 2 -16 -7 0.09 2.05
 -2 -16 7 -0.83 1.90
 -2 16 7 0.09 -2.05
 2 16 -7 -0.83 -1.90
 0 -16 7 -2.39 -0.91
 0 -16 -7 1.04 0.67
 0 16 7 1.04 -0.67
 0 16 -7 -2.39 0.91
 -2 -16 -7 1.99 -3.60
 2 -16 7 -2.53 -1.33
 -2 16 -7 -2.53 1.33
 2 16 7 1.99 3.60
 -4 -16 -7 3.80 -3.11
 4 -16 7 -3.46 -0.29
 4 16 7 3.80 3.11
 -4 16 -7 -3.46 0.29
 7 -17 -7 2.64 0.19
 5 -17 -7 8.10 0.24
 -5 -17 7 -7.93 -2.50
 5 17 -7 -7.93 2.50
 -5 17 7 8.10 -0.24
 -3 -17 7 -3.39 -3.26
 3 -17 -7 3.77 2.09
 -3 17 7 3.77 -2.09
 34 0 -8 -3.70 1.47
 32 0 -8 1.21 -0.34
 30 0 -8 -2.88 -2.01
 28 0 -8 -4.41 -0.34
 26 0 -8 -6.64 1.39
 24 0 -8 -1.03 6.23
 24 0 -8 -1.03 6.23
 22 0 -8 9.95 -2.14
 22 0 -8 9.95 -2.14
 18 0 -8 5.01 -0.81
 18 0 -8 5.01 -0.81
 16 0 -8 -10.37 -0.44
 16 0 -8 -10.37 -0.44
 14 0 -8 2.60 -10.01
 14 0 -8 2.60 -10.01
 12 0 -8 26.50 -16.53
 12 0 -8 26.50 -16.53
 10 0 -8 42.75 1.34
 10 0 -8 42.75 1.34
 10 0 -8 42.75 1.34
 8 0 -8 37.71 0.78
 8 0 -8 37.71 0.78
 8 0 -8 37.71 0.78
 6 0 -8 -24.58 6.03
 6 0 -8 -24.58 6.03
 4 0 -8 83.76 6.91
 -2 0 8 -7.72 -3.13
 2 0 -8 -7.72 3.13
 0 0 -8 -40.05 10.42
 -2 0 -8 -44.52 2.47
 -4 0 -8 -16.30 -3.25
 -6 0 -8 11.61 -0.23
 -8 0 -8 15.58 -12.98
 -8 0 -8 15.58 -12.98
 -10 0 -8 1.55 -8.23
 -10 0 -8 1.55 -8.23
 -12 0 -8 -8.47 -5.76
 -14 0 -8 -9.48 -1.69
 -16 0 -8 -6.09 -2.19
 -18 0 -8 -5.40 2.94
 -20 0 -8 -2.86 -2.83
 -22 0 -8 2.49 -0.91
 33 -1 -8 2.04 1.59
 33 1 -8 1.66 -1.46
 31 -1 -8 0.17 3.06
 31 1 -8 -0.66 -1.33
 29 -1 -8 1.29 1.65
 29 1 -8 1.51 0.34
 27 -1 -8 4.65 -0.59
 27 1 -8 5.23 -0.23
 25 -1 -8 0.85 -0.51
 25 1 -8 0.85 -2.26
 25 1 -8 0.85 -2.26
 23 -1 -8 -3.37 -0.15
 23 1 -8 -2.85 -1.90
 23 1 -8 -2.85 -1.90
 21 1 -8 -3.54 -1.89
 21 1 -8 -3.54 -1.89
 19 -1 -8 1.41 -2.60
 19 -1 -8 1.41 -2.60
 19 1 -8 1.37 1.57
 19 1 -8 1.37 1.57
 17 -1 -8 16.02 -3.17
 17 1 -8 16.06 0.13
 17 1 -8 16.06 0.13
 15 1 -8 16.51 3.11
 15 1 -8 16.51 3.11
 13 -1 -8 -0.97 11.09
 13 -1 -8 -0.97 11.09
 13 1 -8 -0.87 11.41
 13 1 -8 -0.87 11.41
 11 -1 -8 -14.27 4.51
 11 1 -8 -14.95 5.26
 11 1 -8 -14.95 5.26
 9 -1 -8 -4.07 -2.25
 9 1 -8 -4.44 -2.31
 9 1 -8 -4.44 -2.31
 7 -1 -8 35.04 -2.03
 7 1 -8 35.43 -2.03
 7 1 -8 35.43 -2.03
 5 -1 -8 2.64 1.41
 5 -1 -8 2.64 1.41
 5 1 -8 2.58 4.23
 5 1 -8 2.58 4.23
 3 -1 -8 -31.25 3.89
 3 -1 -8 -31.25 3.89
 3 1 -8 -30.96 4.89
 -1 -1 8 9.82 -2.28
 1 -1 -8 8.71 3.89
 1 -1 -8 8.71 3.89
 -1 -1 8 9.82 -2.28
 -1 1 8 8.71 -3.89
 1 1 -8 9.82 2.28
 -1 1 8 8.71 -3.89
 -1 -1 -8 18.04 -3.27
 1 1 8 18.04 3.27
 -1 1 -8 18.19 -4.58
 -3 -1 -8 16.07 -1.62
 -3 1 -8 15.89 -0.51
 3 1 8 16.07 1.62
 -5 -1 -8 2.81 -3.62
 5 1 8 2.81 3.62
 -5 1 -8 2.12 -3.24
 -7 -1 -8 -4.83 4.42
 -7 -1 -8 -4.83 4.42
 7 1 8 -4.83 -4.42
 -7 1 -8 -5.38 4.25
 -7 1 -8 -5.38 4.25
 -9 -1 -8 -4.11 6.74
 -9 -1 -8 -4.11 6.74
 -9 1 -8 -4.14 5.12
 -11 -1 -8 -0.06 5.08
 -11 1 -8 0.73 3.64
 -13 -1 -8 3.10 2.83
 -15 -1 -8 5.06 0.74
 -17 -1 -8 5.26 -2.69
 -19 -1 -8 2.60 0.40
 -21 -1 -8 1.22 1.11
 -21 1 -8 2.05 2.97
 -23 -1 -8 0.78 -1.67
 -23 1 -8 1.30 2.48
 34 -2 -8 0.34 -1.31
 34 2 -8 0.84 1.32
 32 -2 -8 -0.15 -5.89
 32 2 -8 0.67 6.69
 30 -2 -8 5.72 -2.08
 30 2 -8 6.02 4.69
 28 -2 -8 0.13 4.01
 28 2 -8 -0.64 -0.74
 26 -2 -8 0.31 -1.50
 26 2 -8 0.01 1.03
 26 2 -8 0.01 1.03
 24 -2 -8 2.44 -1.09
 24 2 -8 2.40 -4.37
 24 2 -8 2.40 -4.37
 22 -2 -8 -1.57 -1.50
 22 -2 -8 -1.57 -1.50
 22 2 -8 -1.95 4.14
 22 2 -8 -1.95 4.14
 20 -2 -8 -3.45 -1.48
 20 -2 -8 -3.45 -1.48
 20 2 -8 -3.46 1.63
 20 2 -8 -3.46 1.63
 18 -2 -8 -9.41 0.35
 18 2 -8 -9.60 0.00
 18 2 -8 -9.60 0.00
 16 -2 -8 -6.55 1.51
 16 2 -8 -7.17 0.80
 14 -2 -8 -2.88 -3.21
 14 -2 -8 -2.88 -3.21
 14 2 -8 -3.87 -2.46
 14 2 -8 -3.87 -2.46
 12 -2 -8 11.21 -3.40
 12 -2 -8 11.21 -3.40
 12 2 -8 11.62 -3.91
 12 2 -8 11.62 -3.91
 10 -2 -8 11.15 -0.35
 10 -2 -8 11.15 -0.35
 10 2 -8 12.22 -3.39
 10 2 -8 12.22 -3.39
 8 -2 -8 -32.39 4.65
 8 -2 -8 -32.39 4.65
 8 2 -8 -32.69 6.40
 8 2 -8 -32.69 6.40
 6 -2 -8 10.25 4.63
 -6 2 8 10.25 -4.63
 6 2 -8 10.62 -2.29
 6 2 -8 10.62 -2.29
 4 -2 -8 -16.41 -0.59
 4 -2 -8 -16.41 -0.59
 -4 -2 8 -17.10 0.76
 -4 2 8 -16.41 0.59
 4 2 -8 -17.10 -0.76
 4 2 -8 -17.10 -0.76
 -2 -2 8 30.98 -1.27
 2 -2 -8 31.09 0.41
 -2 2 8 31.09 -0.41
 2 2 -8 30.98 1.27
 0 -2 8 10.40 -3.05
 0 -2 -8 11.08 -1.11
 0 -2 -8 11.08 -1.11
 0 2 -8 10.40 3.05
 0 2 8 11.08 1.11
 -2 -2 -8 15.95 1.72
 -2 -2 -8 15.95 1.72
 -2 2 -8 15.27 8.37
 2 2 8 15.95 -1.72
 -4 -2 -8 6.20 2.92
 -4 -2 -8 6.20 2.92
 -4 2 -8 6.38 7.54
 4 2 8 6.20 -2.92
 -6 -2 -8 -5.61 -2.47
 -6 -2 -8 -5.61 -2.47
 -6 2 -8 -5.39 1.73
 6 2 8 -5.61 2.47
 -6 2 -8 -5.39 1.73
 -8 -2 -8 -4.51 -0.52
 -8 -2 -8 -4.51 -0.52
 -8 2 -8 -4.30 0.64
 8 2 8 -4.51 0.52
 -10 -2 -8 2.57 -0.23
 -10 -2 -8 2.57 -0.23
 -10 2 -8 1.74 1.37
 -12 -2 -8 7.12 -0.92
 12 2 8 7.12 0.92
 -14 -2 -8 4.09 0.06
 14 2 8 4.09 -0.06
 -16 -2 -8 -4.89 5.41
 16 2 8 -4.89 -5.41
 -18 -2 -8 -5.52 -0.18
 -20 -2 -8 -4.24 2.60
 -22 -2 -8 -8.70 0.87
 33 -3 -8 -0.94 4.84
 -33 -3 8 -1.87 5.81
 33 3 -8 -1.87 -5.81
 31 -3 -8 -5.69 10.82
 31 3 -8 -6.32 -12.08
 29 -3 -8 -2.90 1.07
 29 3 -8 -2.03 -5.71
 27 -3 -8 1.25 0.51
 27 3 -8 1.04 -1.76
 27 3 -8 1.04 -1.76
 25 -3 -8 4.44 0.45
 25 -3 -8 4.44 0.45
 25 3 -8 3.90 2.94
 25 3 -8 3.90 2.94
 23 -3 -8 4.88 -0.53
 23 -3 -8 4.88 -0.53
 23 3 -8 4.19 1.36
 23 3 -8 4.19 1.36
 21 -3 -8 5.10 -5.26
 21 -3 -8 5.10 -5.26
 21 3 -8 4.89 0.56
 21 3 -8 4.89 0.56
 19 -3 -8 3.44 1.01
 19 -3 -8 3.44 1.01
 19 3 -8 2.52 -1.58
 19 3 -8 2.52 -1.58
 17 -3 -8 -5.43 0.94
 17 3 -8 -5.94 -0.32
 17 3 -8 -5.94 -0.32
 15 -3 -8 -3.86 -2.01
 15 3 -8 -3.25 -4.65
 15 3 -8 -3.25 -4.65
 -15 3 8 -3.86 2.01
 13 -3 -8 2.86 -3.91
 13 -3 -8 2.86 -3.91
 13 3 -8 2.53 -3.65
 11 -3 -8 -9.98 1.82
 11 -3 -8 -9.98 1.82
 11 3 -8 -10.96 1.64
 11 3 -8 -10.96 1.64
 9 -3 -8 7.62 -1.55
 9 -3 -8 7.62 -1.55
 -9 -3 8 7.05 4.74
 -9 3 8 7.62 1.55
 9 3 -8 7.05 -4.74
 9 3 -8 7.05 -4.74
 7 -3 -8 -18.59 4.11
 7 -3 -8 -18.59 4.11
 7 3 -8 -18.54 2.80
 7 3 -8 -18.54 2.80
 -7 3 8 -18.59 -4.11
 5 -3 -8 -13.05 -1.23
 -5 -3 8 -11.45 1.28
 5 -3 -8 -13.05 -1.23
 5 3 -8 -11.45 -1.28
 -5 3 8 -13.05 1.23
 -3 -3 8 16.93 -6.21
 3 -3 -8 15.10 6.01
 3 -3 -8 15.10 6.01
 -3 3 8 15.10 -6.01
 3 3 -8 16.93 6.21
 3 3 -8 16.93 6.21
 1 -3 -8 -6.42 1.97
 -1 -3 8 -5.84 -4.47
 1 -3 -8 -6.42 1.97
 1 3 -8 -5.84 4.47
 1 3 -8 -5.84 4.47
 -1 3 8 -6.42 -1.97
 1 -3 8 -2.69 -1.84
 -1 -3 -8 -4.85 5.83
 1 3 8 -4.85 -5.83
 -1 3 -8 -2.69 1.84
 -3 -3 -8 -17.84 9.51
 3 -3 8 -16.03 1.41
 -3 -3 -8 -17.84 9.51
 3 3 8 -17.84 -9.51
 -3 3 -8 -16.03 -1.41
 -5 -3 -8 -4.00 4.35
 -5 -3 -8 -4.00 4.35
 5 -3 8 -3.17 2.48
 5 3 8 -4.00 -4.35
 -5 3 -8 -3.17 -2.48
 7 -3 8 7.84 -1.13
 -7 -3 -8 8.02 2.54
 -7 -3 -8 8.02 2.54
 7 3 8 8.02 -2.54
 -7 3 -8 7.84 1.13
 -9 -3 -8 2.84 -3.15
 -9 -3 -8 2.84 -3.15
 9 -3 8 2.82 1.25
 -9 3 -8 2.82 -1.25
 9 3 8 2.84 3.15
 -11 -3 -8 -4.68 -3.52
 -11 -3 -8 -4.68 -3.52
 11 3 8 -4.68 3.52
 -11 3 -8 -4.17 -1.31
 -13 -3 -8 -8.42 -0.26
 13 3 8 -8.42 0.26
 -15 -3 -8 -1.22 -2.85
 15 3 8 -1.22 2.85
 -17 -3 -8 4.97 0.80
 17 3 8 4.97 -0.80
 -19 -3 -8 6.55 -0.85
 19 3 8 6.55 0.85
 -21 -3 -8 8.38 -3.06
 -23 -3 -8 5.97 -0.89
 -23 3 -8 6.49 0.98
 -32 -4 8 -0.59 -5.19
 32 -4 -8 -1.40 -5.67
 32 4 -8 -0.59 5.19
 30 -4 -8 -0.38 -8.11
 -30 -4 8 -0.88 -9.29
 30 4 -8 -0.88 9.29
 -28 -4 8 -3.60 -2.21
 28 -4 -8 -4.22 -2.42
 28 -4 -8 -4.22 -2.42
 28 4 -8 -3.60 2.21
 28 4 -8 -3.60 2.21
 26 -4 -8 -2.71 -2.61
 26 -4 -8 -2.71 -2.61
 -26 -4 8 -2.14 -2.97
 26 4 -8 -2.14 2.97
 26 4 -8 -2.14 2.97
 24 -4 -8 -3.16 -6.40
 24 -4 -8 -3.16 -6.40
 24 4 -8 -2.68 2.50
 24 4 -8 -2.68 2.50
 22 -4 -8 -3.51 1.27
 22 -4 -8 -3.51 1.27
 22 4 -8 -4.05 -1.46
 22 4 -8 -4.05 -1.46
 20 -4 -8 -6.19 2.82
 20 -4 -8 -6.19 2.82
 20 4 -8 -6.03 -0.47
 20 4 -8 -6.03 -0.47
 18 -4 -8 3.07 -4.37
 18 4 -8 2.45 -1.84
 -18 4 8 3.07 4.37
 18 4 -8 2.45 -1.84
 16 -4 -8 4.51 -0.14
 -16 -4 8 4.11 0.05
 -16 4 8 4.51 0.14
 16 4 -8 4.11 -0.05
 16 4 -8 4.11 -0.05
 -14 -4 8 -4.96 -6.32
 14 -4 -8 -4.74 8.00
 14 -4 -8 -4.74 8.00
 14 4 -8 -4.96 6.32
 14 4 -8 -4.96 6.32
 -14 4 8 -4.74 -8.00
 12 -4 -8 -7.43 1.60
 12 -4 -8 -7.43 1.60
 -12 -4 8 -7.34 -2.79
 12 4 -8 -7.34 2.79
 12 4 -8 -7.34 2.79
 -12 4 8 -7.43 -1.60
 10 -4 -8 -19.04 5.34
 10 -4 -8 -19.04 5.34
 -10 -4 8 -18.37 -7.77
 -10 4 8 -19.04 -5.34
 10 4 -8 -18.37 7.77
 10 4 -8 -18.37 7.77
 8 -4 -8 2.19 2.03
 8 -4 -8 2.19 2.03
 -8 -4 8 2.79 3.26
 -8 4 8 2.19 -2.03
 8 4 -8 2.79 -3.26
 8 4 -8 2.79 -3.26
 6 -4 -8 -6.16 -6.36
 -6 -4 8 -6.61 5.77
 6 -4 -8 -6.16 -6.36
 6 4 -8 -6.61 -5.77
 -6 4 8 -6.16 6.36
 6 4 -8 -6.61 -5.77
 4 -4 -8 -10.88 -15.88
 4 -4 -8 -10.88 -15.88
 -4 -4 8 -12.56 17.61
 -4 4 8 -10.88 15.88
 4 4 -8 -12.56 -17.61
 4 4 -8 -12.56 -17.61
 2 -4 -8 -29.45 -24.91
 -2 -4 8 -29.34 24.46
 2 -4 -8 -29.45 -24.91
 2 4 -8 -29.34 -24.46
 2 4 -8 -29.34 -24.46
 -2 4 8 -29.45 24.91
 0 -4 -8 -0.61 -10.86
 0 -4 -8 -0.61 -10.86
 0 -4 8 -0.75 8.96
 0 4 -8 -0.75 -8.96
 0 4 8 -0.61 10.86
 0 4 -8 -0.75 -8.96
 -2 -4 -8 0.46 -14.40
 -2 -4 -8 0.46 -14.40
 2 -4 8 -0.43 5.94
 -2 4 -8 -0.43 -5.94
 2 4 8 0.46 14.40
 4 -4 8 4.62 -6.14
 -4 -4 -8 5.45 -0.10
 -4 -4 -8 5.45 -0.10
 4 4 8 5.45 0.10
 -4 4 -8 4.62 6.14
 -6 -4 -8 -6.42 0.26
 6 -4 8 -6.56 -3.80
 6 4 8 -6.42 -0.26
 -6 4 -8 -6.56 3.80
 8 -4 8 -10.07 1.61
 -8 -4 -8 -10.65 -1.99
 -8 -4 -8 -10.65 -1.99
 -8 4 -8 -10.07 -1.61
 8 4 8 -10.65 1.99
 10 -4 8 0.48 -3.36
 -10 -4 -8 0.16 0.73
 -10 -4 -8 0.16 0.73
 -10 4 -8 0.48 3.36
 10 4 8 0.16 -0.73
 -12 -4 -8 5.38 1.07
 12 4 8 5.38 -1.07
 -14 -4 -8 3.07 -1.08
 14 4 8 3.07 1.08
 -16 -4 -8 -0.68 -2.34
 16 4 8 -0.68 2.34
 -18 -4 -8 -3.93 -3.34
 18 4 8 -3.93 3.34
 -20 -4 -8 -6.55 -0.62
 20 4 8 -6.55 0.62
 -22 -4 -8 -2.51 1.23
 22 4 8 -2.51 -1.23
 33 -5 -8 4.06 0.32
 -33 -5 8 3.73 -0.49
 33 5 -8 3.73 0.49
 -31 -5 8 5.76 -2.11
 31 -5 -8 5.75 -0.24
 31 5 -8 5.76 2.11
 -29 -5 8 1.21 -3.33
 29 -5 -8 2.04 -1.35
 29 -5 -8 2.04 -1.35
 29 5 -8 1.21 3.33
 29 5 -8 1.21 3.33
 -27 -5 8 0.00 -2.06
 27 -5 -8 0.44 -0.94
 27 -5 -8 0.44 -0.94
 27 5 -8 0.00 2.06
 27 5 -8 0.00 2.06
 25 -5 -8 -4.00 5.07
 -25 -5 8 -4.10 3.71
 25 -5 -8 -4.00 5.07
 25 5 -8 -4.10 -3.71
 25 5 -8 -4.10 -3.71
 -23 -5 8 -3.39 -0.63
 23 -5 -8 -4.53 1.68
 23 -5 -8 -4.53 1.68
 23 5 -8 -3.39 0.63
 23 5 -8 -3.39 0.63
 -21 -5 8 -1.22 -2.38
 21 -5 -8 -0.86 -3.55
 21 -5 -8 -0.86 -3.55
 21 5 -8 -1.22 2.38
 21 5 -8 -1.22 2.38
 19 -5 -8 -5.09 2.92
 -19 -5 8 -4.31 -3.18
 19 -5 -8 -5.09 2.92
 19 5 -8 -4.31 3.18
 19 5 -8 -4.31 3.18
 17 -5 -8 -11.14 3.95
 17 5 -8 -11.06 6.08
 17 5 -8 -11.06 6.08
 -17 5 8 -11.14 -3.95
 15 -5 -8 -11.73 1.22
 15 -5 -8 -11.73 1.22
 -15 5 8 -11.73 -1.22
 15 5 -8 -11.63 -1.24
 15 5 -8 -11.63 -1.24
 13 -5 -8 -12.07 1.63
 13 -5 -8 -12.07 1.63
 -13 -5 8 -12.29 -3.68
 13 5 -8 -12.29 3.68
 13 5 -8 -12.29 3.68
 -13 5 8 -12.07 -1.63
 11 -5 -8 -4.88 -0.29
 -11 -5 8 -4.33 2.78
 11 -5 -8 -4.88 -0.29
 -11 5 8 -4.88 0.29
 11 5 -8 -4.33 -2.78
 11 5 -8 -4.33 -2.78
 9 -5 -8 -11.46 -3.81
 9 -5 -8 -11.46 -3.81
 -9 -5 8 -11.69 -3.01
 9 5 -8 -11.69 3.01
 -9 5 8 -11.46 3.81
 9 5 -8 -11.69 3.01
 7 -5 -8 -5.03 -10.34
 -7 -5 8 -4.56 -0.92
 7 -5 -8 -5.03 -10.34
 7 5 -8 -4.56 0.92
 7 5 -8 -4.56 0.92
 -7 5 8 -5.03 10.34
 5 -5 -8 3.65 0.03
 -5 -5 8 5.54 -9.01
 5 -5 -8 3.65 0.03
 5 5 -8 5.54 9.01
 -5 5 8 3.65 -0.03
 5 5 -8 5.54 9.01
 3 -5 -8 14.30 10.90
 -3 -5 8 15.81 -17.75
 3 -5 -8 14.30 10.90
 3 5 -8 15.81 17.75
 -3 5 8 14.30 -10.90
 3 5 -8 15.81 17.75
 1 -5 -8 15.16 6.83
 1 -5 -8 15.16 6.83
 1 5 -8 14.76 9.51
 -1 5 8 15.16 -6.83
 1 5 -8 14.76 9.51
 -1 -5 -8 3.23 8.53
 -1 -5 -8 3.23 8.53
 -1 5 -8 2.74 7.94
 -1 5 -8 2.74 7.94
 1 5 8 3.23 -8.53
 -3 -5 -8 3.54 -0.12
 -3 -5 -8 3.54 -0.12
 3 -5 8 3.38 -1.41
 3 5 8 3.54 0.12
 -3 5 -8 3.38 1.41
 -3 5 -8 3.38 1.41
 5 -5 8 2.90 0.42
 -5 -5 -8 2.84 -3.05
 -5 -5 -8 2.84 -3.05
 -5 5 -8 2.90 -0.42
 -5 5 -8 2.90 -0.42
 5 5 8 2.84 3.05
 7 -5 8 6.08 -6.88
 -7 -5 -8 5.67 4.52
 -7 -5 -8 5.67 4.52
 7 5 8 5.67 -4.52
 -7 5 -8 6.08 6.88
 -9 -5 -8 4.63 5.99
 9 -5 8 4.16 -6.02
 -9 -5 -8 4.63 5.99
 -9 5 -8 4.16 6.02
 9 5 8 4.63 -5.99
 -11 -5 -8 0.69 -2.74
 -11 -5 -8 0.69 -2.74
 11 5 8 0.69 2.74
 -11 5 -8 0.30 -3.42
 -13 -5 -8 -2.81 -0.18
 13 5 8 -2.81 0.18
 -15 -5 -8 -0.89 -1.83
 15 5 8 -0.89 1.83
 -17 -5 -8 -0.77 -0.49
 17 5 8 -0.77 0.49
 -19 -5 -8 3.26 -2.36
 19 5 8 3.26 2.36
 -21 -5 -8 1.46 -0.63
 21 5 8 1.46 0.63
 -32 -6 8 -2.94 2.84
 32 -6 -8 -3.67 0.23
 32 -6 -8 -3.67 0.23
 32 6 -8 -2.94 -2.84
 30 -6 -8 -3.67 3.42
 -30 -6 8 -2.10 8.54
 30 -6 -8 -3.67 3.42
 30 6 -8 -2.10 -8.54
 30 6 -8 -2.10 -8.54
 -28 -6 8 4.05 5.45
 28 -6 -8 3.49 3.78
 28 -6 -8 3.49 3.78
 28 6 -8 4.05 -5.45
 28 6 -8 4.05 -5.45
 -26 -6 8 1.26 2.14
 26 -6 -8 0.98 -1.59
 26 -6 -8 0.98 -1.59
 26 6 -8 1.26 -2.14
 26 6 -8 1.26 -2.14
 24 -6 -8 1.56 1.79
 -24 -6 8 0.72 0.22
 24 -6 -8 1.56 1.79
 24 6 -8 0.72 -0.22
 24 6 -8 0.72 -0.22
 -22 -6 8 0.13 0.92
 22 -6 -8 0.76 3.72
 22 -6 -8 0.76 3.72
 22 6 -8 0.13 -0.92
 22 6 -8 0.13 -0.92
 20 -6 -8 1.72 -1.67
 -20 -6 8 1.26 -2.18
 20 -6 -8 1.72 -1.67
 20 6 -8 1.26 2.18
 20 6 -8 1.26 2.18
 18 -6 -8 1.11 -3.76
 18 -6 -8 1.11 -3.76
 -18 -6 8 0.65 -0.47
 18 6 -8 0.65 0.47
 18 6 -8 0.65 0.47
 16 -6 -8 0.76 -5.19
 -16 6 8 0.76 5.19
 16 6 -8 0.21 4.90
 16 6 -8 0.21 4.90
 14 -6 -8 0.67 -5.73
 14 -6 -8 0.67 -5.73
 -14 6 8 0.67 5.73
 14 6 -8 0.71 -0.58
 14 6 -8 0.71 -0.58
 -12 -6 8 -1.43 3.08
 12 -6 -8 -1.54 -3.05
 12 -6 -8 -1.54 -3.05
 12 6 -8 -1.43 -3.08
 12 6 -8 -1.43 -3.08
 -12 6 8 -1.54 3.05
 10 -6 -8 7.48 -3.89
 -10 -6 8 7.15 6.94
 10 -6 -8 7.48 -3.89
 10 6 -8 7.15 -6.94
 -10 6 8 7.48 3.89
 10 6 -8 7.15 -6.94
 8 -6 -8 2.93 -1.87
 -8 -6 8 2.68 3.61
 8 -6 -8 2.93 -1.87
 8 6 -8 2.68 -3.61
 8 6 -8 2.68 -3.61
 -8 6 8 2.93 1.87
 -6 -6 8 10.78 7.06
 6 -6 -8 12.69 5.07
 6 -6 -8 12.69 5.07
 6 6 -8 10.78 -7.06
 -6 6 8 12.69 -5.07
 6 6 -8 10.78 -7.06
 -4 -6 8 0.24 6.41
 -4 -6 8 0.24 6.41
 4 -6 -8 3.72 0.63
 4 -6 -8 3.72 0.63
 -4 6 8 3.72 -0.63
 4 6 -8 0.24 -6.41
 4 6 -8 0.24 -6.41
 2 -6 -8 -1.72 1.38
 2 -6 -8 -1.72 1.38
 -2 -6 8 -3.18 4.76
 2 6 -8 -3.18 -4.76
 2 6 -8 -3.18 -4.76
 -2 6 8 -1.72 -1.38
 0 -6 -8 -13.07 -6.41
 0 -6 -8 -13.07 -6.41
 0 -6 8 -12.65 7.86
 0 6 -8 -12.65 -7.86
 0 6 8 -13.07 6.41
 0 6 -8 -12.65 -7.86
 -2 -6 -8 -6.40 -5.98
 2 -6 8 -6.15 6.42
 -2 -6 -8 -6.40 -5.98
 2 6 8 -6.40 5.98
 -2 6 -8 -6.15 -6.42
 4 -6 8 -1.34 4.95
 -4 -6 -8 -1.62 -5.05
 -4 -6 -8 -1.62 -5.05
 -4 6 -8 -1.34 -4.95
 4 6 8 -1.62 5.05
 -6 -6 -8 3.35 -4.29
 -6 -6 -8 3.35 -4.29
 6 -6 8 3.04 5.48
 6 6 8 3.35 4.29
 -6 6 -8 3.04 -5.48
 -6 6 -8 3.04 -5.48
 8 -6 8 2.97 8.98
 -8 -6 -8 2.74 -10.43
 -8 -6 -8 2.74 -10.43
 8 6 8 2.74 10.43
 -8 6 -8 2.97 -8.98
 -8 6 -8 2.97 -8.98
 -10 -6 -8 -7.27 -0.24
 -10 -6 -8 -7.27 -0.24
 10 -6 8 -7.57 -1.18
 10 6 8 -7.27 0.24
 -10 6 -8 -7.57 1.18
 -12 -6 -8 -5.50 -1.54
 -12 -6 -8 -5.50 -1.54
 12 6 8 -5.50 1.54
 -12 6 -8 -5.38 -0.60
 -14 -6 -8 -1.46 1.07
 14 6 8 -1.46 -1.07
 -16 -6 -8 1.61 -2.17
 16 6 8 1.61 2.17
 -18 -6 -8 2.20 2.54
 18 6 8 2.20 -2.54
 -20 -6 -8 -0.58 0.47
 20 6 8 -0.58 -0.47
 -22 -6 -8 -0.63 -3.55
 22 6 8 -0.63 3.55
 31 -7 -8 3.03 -1.67
 31 -7 -8 3.03 -1.67
 -31 -7 8 3.17 -1.81
 31 7 -8 3.17 1.81
 31 7 -8 3.17 1.81
 -29 -7 8 -0.51 -5.87
 29 -7 -8 -0.55 -4.71
 29 -7 -8 -0.55 -4.71
 29 7 -8 -0.51 5.87
 29 7 -8 -0.51 5.87
 27 -7 -8 -1.38 -2.86
 27 -7 -8 -1.38 -2.86
 -27 -7 8 -0.70 -4.15
 27 7 -8 -0.70 4.15
 27 7 -8 -0.70 4.15
 25 -7 -8 -0.12 -1.18
 -25 -7 8 -0.05 -3.35
 25 -7 -8 -0.12 -1.18
 25 7 -8 -0.05 3.35
 25 7 -8 -0.05 3.35
 23 -7 -8 -0.74 -2.63
 23 -7 -8 -0.74 -2.63
 -23 -7 8 -0.71 -2.58
 23 7 -8 -0.71 2.58
 23 7 -8 -0.71 2.58
 21 -7 -8 -2.28 0.10
 21 -7 -8 -2.28 0.10
 -21 -7 8 -3.00 1.61
 21 7 -8 -3.00 -1.61
 21 7 -8 -3.00 -1.61
 19 -7 -8 0.35 0.71
 19 -7 -8 0.35 0.71
 -19 -7 8 0.33 1.93
 19 7 -8 0.33 -1.93
 19 7 -8 0.33 -1.93
 17 -7 -8 5.66 1.22
 -17 -7 8 5.25 2.36
 17 -7 -8 5.66 1.22
 17 7 -8 5.25 -2.36
 17 7 -8 5.25 -2.36
 15 -7 -8 5.88 2.56
 15 7 -8 5.86 1.19
 -15 7 8 5.88 -2.56
 15 7 -8 5.86 1.19
 -13 -7 8 1.76 -2.28
 13 -7 -8 2.84 2.20
 13 -7 -8 2.84 2.20
 13 7 -8 1.76 2.28
 -13 7 8 2.84 -2.20
 13 7 -8 1.76 2.28
 11 -7 -8 1.73 -1.12
 -11 -7 8 1.55 -1.69
 11 -7 -8 1.73 -1.12
 -11 7 8 1.73 1.12
 11 7 -8 1.55 1.69
 11 7 -8 1.55 1.69
 -9 -7 8 3.39 0.51
 9 -7 -8 2.80 -3.29
 9 -7 -8 2.80 -3.29
 -9 7 8 2.80 3.29
 9 7 -8 3.39 -0.51
 9 7 -8 3.39 -0.51
 7 -7 -8 -2.10 1.70
 7 -7 -8 -2.10 1.70
 -7 -7 8 -0.50 -1.66
 7 7 -8 -0.50 1.66
 7 7 -8 -0.50 1.66
 -7 7 8 -2.10 -1.70
 5 -7 -8 -11.92 -3.42
 -5 -7 8 -9.78 -3.76
 5 -7 -8 -11.92 -3.42
 5 7 -8 -9.78 3.76
 5 7 -8 -9.78 3.76
 -5 7 8 -11.92 3.42
 3 -7 -8 -14.05 -5.43
 -3 -7 8 -12.38 1.87
 3 -7 -8 -14.05 -5.43
 -3 7 8 -14.05 5.43
 3 7 -8 -12.38 -1.87
 -1 -7 8 -3.73 -2.32
 1 -7 -8 -4.24 1.56
 1 -7 -8 -4.24 1.56
 -1 7 8 -4.24 -1.56
 1 7 -8 -3.73 2.32
 1 -7 8 7.64 1.30
 -1 -7 -8 6.85 -2.04
 -1 -7 -8 6.85 -2.04
 1 7 8 6.85 2.04
 -3 -7 -8 6.41 -1.64
 -3 -7 -8 6.41 -1.64
 3 -7 8 7.45 -1.78
 -3 7 -8 7.45 1.78
 -3 7 -8 7.45 1.78
 3 7 8 6.41 1.64
 -5 -7 -8 -3.26 -4.36
 -5 -7 -8 -3.26 -4.36
 5 -7 8 -2.14 -0.52
 5 7 8 -3.26 4.36
 -5 7 -8 -2.14 0.52
 -5 7 -8 -2.14 0.52
 7 -7 8 -7.05 -4.15
 -7 -7 -8 -6.85 1.20
 -7 -7 -8 -6.85 1.20
 7 7 8 -6.85 -1.20
 -7 7 -8 -7.05 4.15
 -7 7 -8 -7.05 4.15
 -9 -7 -8 -3.13 1.86
 -9 -7 -8 -3.13 1.86
 9 -7 8 -2.77 1.04
 9 7 8 -3.13 -1.86
 -9 7 -8 -2.77 -1.04
 -11 -7 -8 2.80 0.54
 -11 -7 -8 2.80 0.54
 11 7 8 2.80 -0.54
 -11 7 -8 3.87 2.50
 -13 -7 -8 6.58 -1.39
 -13 7 -8 7.36 1.62
 13 7 8 6.58 1.39
 -15 -7 -8 2.18 -0.24
 -15 7 -8 3.23 1.51
 15 7 8 2.18 0.24
 -17 -7 -8 -0.22 0.35
 17 7 8 -0.22 -0.35
 -17 7 -8 -0.24 1.59
 -19 -7 -8 -1.03 -4.42
 19 7 8 -1.03 4.42
 -19 7 -8 -1.04 -1.43
 -21 -7 -8 0.75 0.78
 -21 7 -8 0.64 -2.51
 21 7 8 0.75 -0.78
 30 -8 -8 -0.19 1.24
 30 -8 -8 -0.19 1.24
 -30 -8 8 -0.28 -0.84
 30 8 -8 -0.28 0.84
 30 8 -8 -0.28 0.84
 -28 -8 8 0.92 2.69
 28 -8 -8 0.53 3.35
 28 -8 -8 0.53 3.35
 28 8 -8 0.92 -2.69
 28 8 -8 0.92 -2.69
 26 -8 -8 -1.12 1.27
 26 -8 -8 -1.12 1.27
 -26 -8 8 -1.48 -0.44
 26 8 -8 -1.48 0.44
 26 8 -8 -1.48 0.44
 24 -8 -8 3.57 -1.08
 24 -8 -8 3.57 -1.08
 -24 -8 8 3.28 -0.63
 24 8 -8 3.28 0.63
 24 8 -8 3.28 0.63
 22 -8 -8 1.54 -0.61
 -22 -8 8 1.89 -0.57
 22 -8 -8 1.54 -0.61
 22 8 -8 1.89 0.57
 22 8 -8 1.89 0.57
 20 -8 -8 0.42 1.22
 20 -8 -8 0.42 1.22
 -20 -8 8 0.80 -0.48
 20 8 -8 0.80 0.48
 20 8 -8 0.80 0.48
 18 -8 -8 -1.86 -0.68
 -18 -8 8 -2.10 -1.47
 18 -8 -8 -1.86 -0.68
 18 8 -8 -2.10 1.47
 18 8 -8 -2.10 1.47
 16 -8 -8 -0.66 0.82
 -16 -8 8 0.08 3.76
 16 -8 -8 -0.66 0.82
 -16 8 8 -0.66 -0.82
 16 8 -8 0.08 -3.76
 16 8 -8 0.08 -3.76
 -14 -8 8 6.75 4.95
 14 -8 -8 6.46 -3.38
 14 -8 -8 6.46 -3.38
 14 8 -8 6.75 -4.95
 14 8 -8 6.75 -4.95
 -14 8 8 6.46 3.38
 12 -8 -8 7.92 -2.94
 12 -8 -8 7.92 -2.94
 -12 -8 8 9.28 3.12
 12 8 -8 9.28 -3.12
 -12 8 8 7.92 2.94
 12 8 -8 9.28 -3.12
 10 -8 -8 1.98 4.09
 10 -8 -8 1.98 4.09
 -10 -8 8 1.97 -2.47
 10 8 -8 1.97 2.47
 -10 8 8 1.98 -4.09
 10 8 -8 1.97 2.47
 8 -8 -8 -1.92 1.51
 -8 -8 8 -2.89 -0.49
 8 -8 -8 -1.92 1.51
 8 8 -8 -2.89 0.49
 -8 8 8 -1.92 -1.51
 8 8 -8 -2.89 0.49
 -6 -8 8 -4.90 -3.60
 6 -8 -8 -3.56 -1.53
 6 -8 -8 -3.56 -1.53
 6 8 -8 -4.90 3.60
 -6 8 8 -3.56 1.53
 -4 -8 8 10.50 -1.36
 4 -8 -8 10.86 5.84
 4 -8 -8 10.86 5.84
 -4 8 8 10.86 -5.84
 4 8 -8 10.50 1.36
 -2 -8 8 8.48 2.81
 2 -8 -8 9.01 3.49
 2 -8 -8 9.01 3.49
 -2 8 8 9.01 -3.49
 0 -8 -8 3.72 4.24
 0 -8 -8 3.72 4.24
 0 -8 8 2.32 -3.25
 0 8 8 3.72 -4.24
 -2 -8 -8 -6.44 -1.30
 -2 -8 -8 -6.44 -1.30
 2 -8 8 -7.76 0.63
 -2 8 -8 -7.76 -0.63
 2 8 8 -6.44 1.30
 -4 -8 -8 -4.69 2.76
 -4 -8 -8 -4.69 2.76
 4 -8 8 -5.46 2.82
 -4 8 -8 -5.46 -2.82
 4 8 8 -4.69 -2.76
 -6 -8 -8 2.64 0.55
 6 -8 8 2.63 0.96
 -6 -8 -8 2.64 0.55
 -6 8 -8 2.63 -0.96
 6 8 8 2.64 -0.55
 8 -8 8 6.56 -3.23
 -8 -8 -8 5.92 -0.54
 -8 -8 -8 5.92 -0.54
 -8 8 -8 6.56 3.23
 8 8 8 5.92 0.54
 -10 -8 -8 9.24 -4.49
 -10 -8 -8 9.24 -4.49
 -10 8 -8 9.11 1.86
 10 8 8 9.24 4.49
 -12 -8 -8 -0.05 -0.06
 -12 -8 -8 -0.05 -0.06
 -12 8 -8 -1.02 1.59
 12 8 8 -0.05 0.06
 -14 -8 -8 -2.84 -2.85
 -14 8 -8 -3.63 4.99
 14 8 8 -2.84 2.85
 -16 -8 -8 -2.58 -1.06
 16 8 8 -2.58 1.06
 -16 8 -8 -3.74 0.65
 -18 -8 -8 -2.42 1.90
 18 8 8 -2.42 -1.90
 -18 8 -8 -2.38 2.33
 -20 -8 -8 -0.32 4.41
 20 8 8 -0.32 -4.41
 -20 8 -8 -0.20 2.36
 -29 -9 8 -0.28 2.09
 29 -9 -8 -0.25 1.72
 29 -9 -8 -0.25 1.72
 29 9 -8 -0.28 -2.09
 27 -9 -8 1.37 1.43
 27 -9 -8 1.37 1.43
 -27 -9 8 1.12 2.38
 27 9 -8 1.12 -2.38
 27 9 -8 1.12 -2.38
 -25 -9 8 -0.30 3.22
 25 -9 -8 -1.36 3.46
 25 -9 -8 -1.36 3.46
 25 9 -8 -0.30 -3.22
 25 9 -8 -0.30 -3.22
 23 -9 -8 -2.72 4.85
 -23 -9 8 -2.58 3.48
 23 -9 -8 -2.72 4.85
 23 9 -8 -2.58 -3.48
 23 9 -8 -2.58 -3.48
 21 -9 -8 2.43 3.13
 -21 -9 8 2.83 -1.04
 21 -9 -8 2.43 3.13
 21 9 -8 2.83 1.04
 21 9 -8 2.83 1.04
 -19 -9 8 0.70 4.48
 19 -9 -8 1.79 3.55
 19 -9 -8 1.79 3.55
 19 9 -8 0.70 -4.48
 19 9 -8 0.70 -4.48
 17 -9 -8 1.72 3.67
 -17 -9 8 1.87 2.36
 17 -9 -8 1.72 3.67
 17 9 -8 1.87 -2.36
 17 9 -8 1.87 -2.36
 15 -9 -8 -3.43 -0.24
 -15 -9 8 -4.05 2.00
 15 -9 -8 -3.43 -0.24
 15 9 -8 -4.05 -2.00
 15 9 -8 -4.05 -2.00
 -15 9 8 -3.43 0.24
 13 -9 -8 -3.97 2.54
 13 -9 -8 -3.97 2.54
 -13 -9 8 -4.08 -0.94
 -13 9 8 -3.97 -2.54
 13 9 -8 -4.08 0.94
 13 9 -8 -4.08 0.94
 11 -9 -8 -0.16 -2.26
 -11 -9 8 -0.82 -0.81
 11 -9 -8 -0.16 -2.26
 -11 9 8 -0.16 2.26
 11 9 -8 -0.82 0.81
 11 9 -8 -0.82 0.81
 9 -9 -8 0.44 0.17
 -9 -9 8 1.28 -0.17
 9 -9 -8 0.44 0.17
 9 9 -8 1.28 0.17
 -9 9 8 0.44 -0.17
 7 -9 -8 7.57 4.60
 7 -9 -8 7.57 4.60
 -7 -9 8 8.29 0.75
 -7 9 8 7.57 -4.60
 7 9 -8 8.29 -0.75
 5 -9 -8 0.13 1.41
 -5 -9 8 1.12 6.73
 5 -9 -8 0.13 1.41
 -5 9 8 0.13 -1.41
 5 9 -8 1.12 -6.73
 -3 -9 8 -3.86 -3.63
 3 -9 -8 -3.85 4.54
 3 -9 -8 -3.85 4.54
 -3 9 8 -3.85 -4.54
 -1 -9 8 -1.37 -1.22
 1 -9 -8 -2.11 -6.10
 1 -9 -8 -2.11 -6.10
 1 9 -8 -1.37 1.22
 -1 9 8 -2.11 6.10
 -1 -9 -8 1.30 5.42
 1 -9 8 2.46 2.43
 -1 -9 -8 1.30 5.42
 -1 9 -8 2.46 -2.43
 1 9 8 1.30 -5.42
 -3 -9 -8 6.16 5.76
 3 -9 8 6.43 -5.76
 -3 -9 -8 6.16 5.76
 3 9 8 6.16 -5.76
 -3 9 -8 6.43 5.76
 5 -9 8 3.96 -1.74
 -5 -9 -8 3.95 -0.44
 -5 -9 -8 3.95 -0.44
 5 9 8 3.95 0.44
 -5 9 -8 3.96 1.74
 7 -9 8 0.97 4.35
 -7 -9 -8 0.71 -3.47
 -7 -9 -8 0.71 -3.47
 7 9 8 0.71 3.47
 -7 9 -8 0.97 -4.35
 -9 -9 -8 -5.88 -1.19
 9 -9 8 -6.30 1.79
 -9 -9 -8 -5.88 -1.19
 -9 9 -8 -6.30 -1.79
 9 9 8 -5.88 1.19
 -11 -9 -8 -6.87 0.72
 -11 -9 -8 -6.87 0.72
 11 9 8 -6.87 -0.72
 -11 9 -8 -5.60 -2.94
 -13 -9 -8 -2.61 0.30
 13 9 8 -2.61 -0.30
 -13 9 -8 -2.19 -1.87
 -15 -9 -8 0.44 2.36
 -15 9 -8 1.32 -2.57
 15 9 8 0.44 -2.36
 -17 -9 -8 0.93 -1.72
 17 9 8 0.93 1.72
 -17 9 -8 0.99 -2.58
 -19 -9 -8 0.80 -2.93
 19 9 8 0.80 2.93
 -19 9 -8 0.43 -3.62
 -28 -10 8 -2.71 -1.00
 28 -10 -8 -2.52 -1.40
 28 10 -8 -2.71 1.00
 26 -10 -8 0.27 -1.50
 -26 -10 8 0.12 -0.38
 26 10 -8 0.12 0.38
 24 -10 -8 3.76 -2.71
 24 -10 -8 3.76 -2.71
 -24 -10 8 4.11 0.79
 24 10 -8 4.11 -0.79
 -22 -10 8 1.10 2.79
 22 -10 -8 1.33 -0.82
 22 -10 -8 1.33 -0.82
 22 10 -8 1.10 -2.79
 20 -10 -8 3.10 -1.89
 20 -10 -8 3.10 -1.89
 -20 -10 8 3.30 -1.24
 20 10 -8 3.30 1.24
 -18 -10 8 1.50 -3.78
 18 -10 -8 2.10 -1.71
 18 -10 -8 2.10 -1.71
 18 10 -8 1.50 3.78
 16 -10 -8 1.31 -2.63
 -16 -10 8 0.61 0.94
 16 -10 -8 1.31 -2.63
 16 10 -8 0.61 -0.94
 14 -10 -8 0.26 -0.28
 -14 -10 8 0.57 -1.48
 14 -10 -8 0.26 -0.28
 14 10 -8 0.57 1.48
 -14 10 8 0.26 0.28
 12 -10 -8 -2.96 -0.24
 -12 -10 8 -2.92 1.88
 12 -10 -8 -2.96 -0.24
 12 10 -8 -2.92 -1.88
 10 -10 -8 0.97 3.31
 10 -10 -8 0.97 3.31
 -10 -10 8 -0.24 0.99
 10 10 -8 -0.24 -0.99
 -10 10 8 0.97 -3.31
 8 -10 -8 -0.34 -1.91
 8 -10 -8 -0.34 -1.91
 -8 -10 8 -0.81 1.45
 8 10 -8 -0.81 -1.45
 -8 10 8 -0.34 1.91
 6 -10 -8 1.06 0.99
 6 -10 -8 1.06 0.99
 -6 -10 8 0.39 -1.60
 -6 10 8 1.06 -0.99
 6 10 -8 0.39 1.60
 4 -10 -8 1.48 -5.96
 -4 -10 8 1.74 1.07
 4 -10 -8 1.48 -5.96
 -4 10 8 1.48 5.96
 4 10 -8 1.74 -1.07
 2 -10 -8 3.19 -3.60
 2 -10 -8 3.19 -3.60
 -2 -10 8 3.95 5.17
 2 10 -8 3.95 -5.17
 -2 10 8 3.19 3.60
 0 -10 8 0.40 0.28
 0 -10 -8 1.25 0.73
 0 -10 -8 1.25 0.73
 0 10 -8 0.40 -0.28
 0 10 8 1.25 -0.73
 -2 -10 -8 -2.07 -3.66
 2 -10 8 -2.32 1.68
 -2 -10 -8 -2.07 -3.66
 2 10 8 -2.07 3.66
 -2 10 -8 -2.32 -1.68
 4 -10 8 -1.39 2.58
 -4 -10 -8 -0.30 -1.59
 -4 -10 -8 -0.30 -1.59
 4 10 8 -0.30 1.59
 -4 10 -8 -1.39 -2.58
 -6 -10 -8 -2.14 5.97
 -6 -10 -8 -2.14 5.97
 6 -10 8 -2.38 -2.22
 -6 10 -8 -2.38 2.22
 6 10 8 -2.14 -5.97
 -8 -10 -8 -1.14 3.46
 -8 -10 -8 -1.14 3.46
 8 -10 8 -0.85 -0.42
 -8 10 -8 -0.85 0.42
 8 10 8 -1.14 -3.46
 -10 -10 -8 4.54 -0.17
 -10 -10 -8 4.54 -0.17
 -10 10 -8 4.57 -1.80
 10 10 8 4.54 0.17
 -12 -10 -8 6.50 -0.69
 -12 -10 -8 6.50 -0.69
 -12 10 -8 5.79 -2.51
 12 10 8 6.50 0.69
 -14 -10 -8 1.42 1.98
 -14 10 -8 1.13 -4.94
 14 10 8 1.42 -1.98
 -16 -10 -8 1.70 1.13
 -16 10 -8 0.92 -0.39
 16 10 8 1.70 -1.13
 -18 -10 -8 1.75 3.13
 -18 10 -8 2.23 -0.05
 18 10 8 1.75 -3.13
 27 -11 -8 1.17 0.14
 -27 -11 8 1.27 1.18
 27 11 -8 1.27 -1.18
 -25 -11 8 -3.08 3.37
 25 -11 -8 -2.22 1.58
 25 11 -8 -3.08 -3.37
 23 -11 -8 -0.85 -3.17
 -23 -11 8 -0.86 -3.06
 23 11 -8 -0.86 3.06
 -21 -11 8 -1.38 2.19
 21 -11 -8 -1.88 -2.13
 21 11 -8 -1.38 -2.19
 19 -11 -8 -0.90 0.85
 -19 -11 8 0.34 4.66
 19 -11 -8 -0.90 0.85
 19 11 -8 0.34 -4.66
 17 -11 -8 -2.97 1.36
 -17 -11 8 -1.07 2.62
 17 -11 -8 -2.97 1.36
 17 11 -8 -1.07 -2.62
 15 -11 -8 1.66 4.44
 15 -11 -8 1.66 4.44
 -15 -11 8 1.07 -4.08
 15 11 -8 1.07 4.08
 -13 -11 8 1.51 0.81
 13 -11 -8 2.04 1.71
 13 -11 -8 2.04 1.71
 -13 11 8 2.04 -1.71
 13 11 -8 1.51 -0.81
 11 -11 -8 -1.78 1.54
 -11 -11 8 -2.00 -0.40
 11 -11 -8 -1.78 1.54
 11 11 -8 -2.00 0.40
 -11 11 8 -1.78 -1.54
 -9 -11 8 -1.40 -2.93
 9 -11 -8 -1.58 -0.42
 9 -11 -8 -1.58 -0.42
 -9 11 8 -1.58 0.42
 9 11 -8 -1.40 2.93
 7 -11 -8 -1.56 -2.12
 -7 -11 8 -2.43 -0.90
 7 -11 -8 -1.56 -2.12
 7 11 -8 -2.43 0.90
 -7 11 8 -1.56 2.12
 -5 -11 8 -0.72 -0.12
 5 -11 -8 -0.58 -1.88
 5 -11 -8 -0.58 -1.88
 -5 11 8 -0.58 1.88
 5 11 -8 -0.72 0.12
 3 -11 -8 -2.04 0.32
 3 -11 -8 -2.04 0.32
 -3 -11 8 -2.72 -2.66
 3 11 -8 -2.72 2.66
 -3 11 8 -2.04 -0.32
 1 -11 -8 0.07 2.04
 1 -11 -8 0.07 2.04
 -1 -11 8 -0.68 -0.88
 -1 11 8 0.07 -2.04
 1 11 -8 -0.68 0.88
 1 -11 8 3.62 -1.05
 -1 -11 -8 3.30 -2.16
 -1 -11 -8 3.30 -2.16
 -1 11 -8 3.62 1.05
 1 11 8 3.30 2.16
 -3 -11 -8 -0.41 5.41
 3 -11 8 -0.87 1.94
 -3 -11 -8 -0.41 5.41
 3 11 8 -0.41 -5.41
 -3 11 -8 -0.87 -1.94
 5 -11 8 -0.62 5.88
 -5 -11 -8 -2.42 1.08
 -5 -11 -8 -2.42 1.08
 5 11 8 -2.42 -1.08
 -5 11 -8 -0.62 -5.88
 -7 -11 -8 2.42 -0.47
 -7 -11 -8 2.42 -0.47
 7 -11 8 0.80 2.82
 7 11 8 2.42 0.47
 -7 11 -8 0.80 -2.82
 9 -11 8 0.49 0.85
 -9 -11 -8 0.59 1.04
 -9 -11 -8 0.59 1.04
 -9 11 -8 0.49 -0.85
 9 11 8 0.59 -1.04
 -11 -11 -8 -3.13 2.74
 -11 -11 -8 -3.13 2.74
 -11 11 -8 -3.81 1.93
 11 11 8 -3.13 -2.74
 -13 -11 -8 1.82 1.84
 -13 11 -8 2.06 1.18
 13 11 8 1.82 -1.84
 -15 -11 -8 -0.18 1.26
 15 11 8 -0.18 -1.26
 -15 11 -8 0.01 -0.74
 24 -12 -8 0.15 4.54
 -24 -12 8 0.46 -0.48
 24 12 -8 0.46 0.48
 22 -12 -8 -1.13 8.92
 -22 -12 8 -1.38 4.27
 22 12 -8 -1.38 -4.27
 -20 -12 8 -4.98 -2.56
 20 -12 -8 -4.40 5.35
 20 12 -8 -4.98 2.56
 -18 -12 8 0.14 -1.28
 18 -12 -8 0.53 0.25
 18 12 -8 0.14 1.28
 -16 -12 8 -2.98 -1.37
 16 -12 -8 -2.43 0.76
 16 12 -8 -2.98 1.37
 14 -12 -8 0.16 -1.26
 -14 -12 8 0.34 0.70
 14 12 -8 0.34 -0.70
 12 -12 -8 0.21 3.64
 -12 -12 8 0.71 -6.48
 12 -12 -8 0.21 3.64
 12 12 -8 0.71 6.48
 -12 12 8 0.21 -3.64
 10 -12 -8 2.37 -2.84
 -10 -12 8 3.19 -2.40
 10 -12 -8 2.37 -2.84
 10 12 -8 3.19 2.40
 -10 12 8 2.37 2.84
 -8 -12 8 0.56 6.86
 8 -12 -8 -1.04 2.00
 8 -12 -8 -1.04 2.00
 8 12 -8 0.56 -6.86
 -8 12 8 -1.04 -2.00
 -6 -12 8 -1.84 1.79
 6 -12 -8 -2.97 1.22
 6 -12 -8 -2.97 1.22
 6 12 -8 -1.84 -1.79
 -6 12 8 -2.97 -1.22
 4 -12 -8 -1.18 4.88
 -4 -12 8 -1.62 1.04
 4 -12 -8 -1.18 4.88
 -4 12 8 -1.18 -4.88
 4 12 -8 -1.62 -1.04
 -2 -12 8 -1.60 -0.78
 2 -12 -8 -2.37 3.28
 2 -12 -8 -2.37 3.28
 2 12 -8 -1.60 0.78
 -2 12 8 -2.37 -3.28
 0 -12 8 -4.03 1.46
 0 -12 -8 -4.37 3.07
 0 -12 -8 -4.37 3.07
 0 12 8 -4.37 -3.07
 0 12 -8 -4.03 -1.46
 -2 -12 -8 -3.31 1.54
 2 -12 8 -3.33 1.25
 -2 -12 -8 -3.31 1.54
 -2 12 -8 -3.33 -1.25
 2 12 8 -3.31 -1.54
 4 -12 8 1.06 -5.67
 -4 -12 -8 1.86 -3.52
 -4 -12 -8 1.86 -3.52
 -4 12 -8 1.06 5.67
 4 12 8 1.86 3.52
 6 -12 8 -0.23 -2.88
 -6 -12 -8 0.71 -3.88
 -6 -12 -8 0.71 -3.88
 -6 12 -8 -0.23 2.88
 6 12 8 0.71 3.88
 -8 -12 -8 -3.41 0.06
 -8 -12 -8 -3.41 0.06
 8 -12 8 -3.91 -0.35
 8 12 8 -3.41 -0.06
 -8 12 -8 -3.91 0.35
 -10 -12 -8 -0.09 5.09
 -10 -12 -8 -0.09 5.09
 -10 12 -8 -1.20 -4.32
 10 12 8 -0.09 -5.09
 -12 -12 -8 -2.68 0.73
 -12 12 -8 -3.24 -1.47
 12 12 8 -2.68 -0.73
 -14 -12 -8 -2.49 -0.31
 -14 12 -8 -2.60 0.49
 14 12 8 -2.49 0.31
 23 -13 -8 -1.50 -4.23
 -23 -13 8 -0.83 -1.87
 23 13 -8 -0.83 1.87
 21 -13 -8 2.99 -5.24
 -21 -13 8 3.89 0.04
 21 13 -8 3.89 -0.04
 -19 -13 8 -1.12 -1.32
 19 -13 -8 -1.31 0.56
 19 13 -8 -1.12 1.32
 17 -13 -8 1.51 5.98
 -17 -13 8 1.39 -3.28
 17 13 -8 1.39 3.28
 -15 -13 8 -0.29 -5.00
 15 -13 -8 -1.12 5.69
 15 13 -8 -0.29 5.00
 -13 -13 8 -2.41 2.08
 13 -13 -8 -3.08 1.62
 13 13 -8 -2.41 -2.08
 -11 -13 8 -1.95 7.15
 11 -13 -8 -0.96 0.24
 -11 13 8 -0.96 -0.24
 11 13 -8 -1.95 -7.15
 9 -13 -8 -3.19 2.91
 -9 -13 8 -4.62 -0.17
 9 13 -8 -4.62 0.17
 -9 13 8 -3.19 -2.91
 -7 -13 8 0.19 -11.62
 7 -13 -8 2.74 0.90
 -7 13 8 2.74 -0.90
 7 13 -8 0.19 11.62
 5 -13 -8 2.33 -1.67
 -5 -13 8 2.07 -3.88
 5 13 -8 2.07 3.88
 -5 13 8 2.33 1.67
 3 -13 -8 2.04 -2.47
 -3 -13 8 1.87 -1.37
 3 -13 -8 2.04 -2.47
 -3 13 8 2.04 2.47
 3 13 -8 1.87 1.37
 1 -13 -8 -0.38 -2.13
 -1 -13 8 0.05 0.28
 1 -13 -8 -0.38 -2.13
 -1 13 8 -0.38 2.13
 1 13 -8 0.05 -0.28
 -1 -13 -8 1.58 -5.49
 -1 -13 -8 1.58 -5.49
 1 -13 8 1.64 -0.03
 -1 13 -8 1.64 0.03
 1 13 8 1.58 5.49
 3 -13 8 0.58 6.41
 -3 -13 -8 0.21 -5.88
 -3 -13 -8 0.21 -5.88
 3 13 8 0.21 5.88
 -3 13 -8 0.58 -6.41
 -5 -13 -8 -2.08 6.72
 -5 -13 -8 -2.08 6.72
 5 -13 8 -3.60 4.74
 5 13 8 -2.08 -6.72
 -5 13 -8 -3.60 -4.74
 -7 -13 -8 1.48 7.25
 -7 -13 -8 1.48 7.25
 7 -13 8 2.67 2.01
 -7 13 -8 2.67 -2.01
 7 13 8 1.48 -7.25
 -9 -13 -8 0.89 -2.54
 -9 -13 -8 0.89 -2.54
 9 13 8 0.89 2.54
 -9 13 -8 0.65 5.17
 -11 -13 -8 1.43 -2.48
 -11 -13 -8 1.43 -2.48
 -11 13 -8 2.53 1.63
 11 13 8 1.43 2.48
 -13 -13 -8 -0.04 0.30
 -13 13 -8 -0.18 -1.40
 13 13 8 -0.04 -0.30
 -20 -14 8 -1.32 -0.53
 20 -14 -8 -1.44 -0.50
 20 14 -8 -1.32 0.53
 18 -14 -8 -2.55 -1.49
 -18 -14 8 -1.59 0.10
 18 14 -8 -1.59 -0.10
 -16 -14 8 0.56 4.54
 16 -14 -8 0.64 -6.69
 16 14 -8 0.56 -4.54
 14 -14 -8 0.13 -2.10
 -14 -14 8 -0.67 0.04
 14 14 -8 -0.67 -0.04
 -12 -14 8 0.34 -7.79
 12 -14 -8 2.11 1.82
 12 14 -8 0.34 7.79
 10 -14 -8 -1.80 5.35
 -10 -14 8 -0.83 -7.49
 -10 14 8 -1.80 -5.35
 10 14 -8 -0.83 7.49
 8 -14 -8 -3.75 -0.12
 -8 -14 8 -2.44 4.06
 -8 14 8 -3.75 0.12
 8 14 -8 -2.44 -4.06
 -6 -14 8 -3.74 9.16
 6 -14 -8 -6.07 6.75
 -6 14 8 -6.07 -6.75
 6 14 -8 -3.74 -9.16
 4 -14 -8 -4.71 4.22
 -4 -14 8 -4.35 4.99
 -4 14 8 -4.71 -4.22
 4 14 -8 -4.35 -4.99
 2 -14 -8 -2.23 0.36
 -2 -14 8 -3.23 3.21
 2 14 -8 -3.23 -3.21
 -2 14 8 -2.23 -0.36
 0 -14 -8 -3.32 0.95
 0 -14 8 -4.34 -0.74
 0 14 8 -3.32 -0.95
 0 14 -8 -4.34 0.74
 2 -14 8 -5.06 -8.12
 -2 -14 -8 -4.57 6.04
 -2 14 -8 -5.06 8.12
 2 14 8 -4.57 -6.04
 4 -14 8 -0.41 -9.47
 -4 -14 -8 -0.88 -3.36
 -4 14 -8 -0.41 9.47
 4 14 8 -0.88 3.36
 -6 -14 -8 -0.70 -9.99
 6 -14 8 -1.88 -10.59
 -6 -14 -8 -0.70 -9.99
 6 14 8 -0.70 9.99
 -6 14 -8 -1.88 10.59
 -8 -14 -8 0.57 -3.00
 -8 -14 -8 0.57 -3.00
 8 14 8 0.57 3.00
 -8 14 -8 -0.38 -1.96
 -10 -14 -8 0.17 0.86
 -10 -14 -8 0.17 0.86
 -10 14 -8 0.17 -0.19
 10 14 8 0.17 -0.86
 17 -15 -8 0.10 -1.07
 -17 -15 8 -0.10 -1.25
 17 15 -8 -0.10 1.25
 -15 -15 8 -0.62 -0.69
 15 -15 -8 -1.88 2.52
 15 15 -8 -0.62 0.69
 -13 -15 8 1.12 1.13
 13 -15 -8 -0.07 2.14
 13 15 -8 1.12 -1.13
 11 -15 -8 -0.67 -3.73
 -11 -15 8 0.92 4.98
 11 15 -8 0.92 -4.98
 -9 -15 8 4.86 0.76
 9 -15 -8 5.82 -1.04
 -9 15 8 5.82 1.04
 9 15 -8 4.86 -0.76
 7 -15 -8 3.46 -3.87
 -7 -15 8 2.51 -2.94
 7 15 -8 2.51 2.94
 -7 15 8 3.46 3.87
 -5 -15 8 0.26 -2.54
 5 -15 -8 1.54 -7.48
 5 15 -8 0.26 2.54
 -5 15 8 1.54 7.48
 -3 -15 8 1.09 -4.38
 3 -15 -8 0.86 -3.51
 -3 15 8 0.86 3.51
 3 15 -8 1.09 4.38
 -1 -15 8 0.70 0.86
 1 -15 -8 0.10 -1.17
 1 15 -8 0.70 -0.86
 -1 15 8 0.10 1.17
 -1 -15 -8 2.93 -1.57
 1 -15 8 3.28 2.54
 1 15 8 2.93 1.57
 -1 15 -8 3.28 -2.54
 -3 -15 -8 2.07 1.04
 3 -15 8 1.35 3.93
 -3 15 -8 1.35 -3.93
 3 15 8 2.07 -1.04
 5 -15 8 0.60 9.54
 -5 -15 -8 -0.58 5.39
 5 15 8 -0.58 -5.39
 -5 15 -8 0.60 -9.54
 7 -15 8 1.36 1.29
 -7 -15 -8 0.16 3.22
 -7 15 -8 1.36 -1.29
 7 15 8 0.16 -3.22
 14 -16 -8 2.05 -3.06
 -14 -16 8 1.80 1.53
 14 16 -8 1.80 -1.53
 12 -16 -8 -1.45 -0.84
 -12 -16 8 -0.96 1.04
 12 16 -8 -0.96 -1.04
 10 -16 -8 -1.47 0.56
 -10 -16 8 -1.75 -1.08
 10 16 -8 -1.75 1.08
 -8 -16 8 -3.51 -1.81
 8 -16 -8 -3.85 1.34
 8 16 -8 -3.51 1.81
 -8 16 8 -3.85 -1.34
 -6 -16 8 -0.65 -1.63
 6 -16 -8 0.48 -0.08
 6 16 -8 -0.65 1.63
 -6 16 8 0.48 0.08
 -4 -16 8 -1.04 -0.85
 4 -16 -8 -0.19 1.80
 -4 16 8 -0.19 -1.80
 4 16 -8 -1.04 0.85
 2 -16 -8 0.98 0.30
 -2 -16 8 0.65 -2.31
 -2 16 8 0.98 -0.30
 2 16 -8 0.65 2.31
 0 -16 -8 0.79 -0.26
 0 -16 8 -0.35 -4.96
 0 16 -8 -0.35 4.96
 0 16 8 0.79 0.26
 2 -16 8 -1.23 -1.18
 -2 -16 -8 -1.26 -0.84
 2 16 8 -1.26 0.84
 -2 16 -8 -1.23 1.18
 -4 -16 -8 -1.04 0.11
 4 -16 8 -0.23 -4.84
 4 16 8 -1.04 -0.11
 33 -1 -9 -1.00 -2.89
 33 1 -9 1.56 -0.56
 31 -1 -9 3.94 -2.74
 31 1 -9 -3.58 -2.01
 29 -1 -9 -0.36 1.52
 29 1 -9 1.14 0.32
 27 -1 -9 -1.98 2.17
 27 1 -9 2.53 0.46
 25 -1 -9 -3.38 2.25
 25 1 -9 2.32 8.77
 23 -1 -9 -7.83 3.97
 23 1 -9 6.54 -0.22
 23 1 -9 6.54 -0.22
 21 -1 -9 -3.76 1.27
 21 1 -9 3.91 0.71
 21 1 -9 3.91 0.71
 19 -1 -9 1.37 1.45
 19 -1 -9 1.37 1.45
 19 1 -9 -1.32 1.50
 19 1 -9 -1.32 1.50
 17 -1 -9 9.23 -0.25
 17 -1 -9 9.23 -0.25
 17 1 -9 -9.68 1.92
 17 1 -9 -9.68 1.92
 15 -1 -9 -2.63 2.41
 15 -1 -9 -2.63 2.41
 15 1 -9 3.07 -2.43
 15 1 -9 3.07 -2.43
 13 -1 -9 -10.05 6.17
 13 1 -9 10.62 -6.33
 13 1 -9 10.62 -6.33
 11 -1 -9 -9.67 -1.69
 11 -1 -9 -9.67 -1.69
 11 1 -9 10.51 2.98
 11 1 -9 10.51 2.98
 9 -1 -9 1.09 -1.83
 9 -1 -9 1.09 -1.83
 9 -1 -9 1.09 -1.83
 9 1 -9 -1.24 0.97
 9 1 -9 -1.24 0.97
 7 -1 -9 53.29 -5.38
 7 -1 -9 53.29 -5.38
 7 1 -9 -53.08 5.58
 7 1 -9 -53.08 5.58
 5 -1 -9 -32.86 -2.11
 5 -1 -9 -32.86 -2.11
 5 1 -9 33.56 0.38
 -3 -1 9 2.46 3.78
 3 -1 -9 -2.56 6.57
 3 -1 -9 -2.56 6.57
 3 1 -9 2.46 -3.78
 1 -1 -9 -13.13 3.85
 1 -1 -9 -13.13 3.85
 -1 1 9 -13.13 -3.85
 1 1 -9 14.89 0.22
 -1 -1 -9 10.17 4.49
 -1 1 -9 -9.63 -4.42
 -3 -1 -9 22.91 2.17
 -3 1 -9 -21.79 -2.50
 3 1 9 22.91 -2.17
 -5 -1 -9 12.31 -5.41
 -5 1 -9 -12.48 4.78
 5 1 9 12.31 5.41
 -7 -1 -9 -2.54 2.32
 -7 1 -9 1.23 -2.82
 -9 -1 -9 -5.01 0.77
 -9 1 -9 5.13 -0.97
 -11 -1 -9 -0.90 1.74
 -11 1 -9 0.26 -0.60
 -13 -1 -9 2.09 -0.48
 -13 1 -9 -2.18 0.72
 -15 -1 -9 0.07 0.50
 -15 1 -9 -0.51 -3.95
 -17 -1 -9 2.88 -6.42
 -17 1 -9 -4.07 -0.59
 -19 -1 -9 2.77 3.85
 -19 1 -9 -2.27 -5.20
 -21 -1 -9 -3.80 2.60
 -21 1 -9 2.70 -1.18
 34 -2 -9 -0.22 0.69
 34 2 -9 0.09 -0.95
 32 -2 -9 1.40 3.39
 32 2 -9 -0.95 1.10
 30 -2 -9 1.81 -1.55
 30 2 -9 -1.68 1.51
 28 -2 -9 1.89 -1.78
 28 2 -9 -2.13 0.58
 26 -2 -9 3.13 -0.01
 26 2 -9 -3.68 -3.10
 24 -2 -9 5.17 2.41
 24 2 -9 -4.23 -2.48
 24 2 -9 -4.23 -2.48
 22 -2 -9 12.18 -2.08
 22 -2 -9 12.18 -2.08
 22 2 -9 -12.32 0.01
 22 2 -9 -12.32 0.01
 20 2 -9 -13.36 2.18
 20 2 -9 -13.36 2.18
 18 -2 -9 -2.92 -0.43
 18 2 -9 3.05 -2.44
 18 2 -9 3.05 -2.44
 16 -2 -9 -4.84 -0.83
 16 -2 -9 -4.84 -0.83
 16 2 -9 4.05 1.86
 14 -2 -9 11.57 -9.32
 14 -2 -9 11.57 -9.32
 14 2 -9 -11.89 8.89
 14 2 -9 -11.89 8.89
 12 -2 -9 21.60 -6.87
 12 -2 -9 21.60 -6.87
 12 2 -9 -22.81 8.01
 12 2 -9 -22.81 8.01
 10 -2 -9 31.09 -5.24
 10 -2 -9 31.09 -5.24
 10 2 -9 -31.17 2.63
 10 2 -9 -31.17 2.63
 8 -2 -9 -10.04 1.68
 8 2 -9 10.51 -3.42
 8 2 -9 10.51 -3.42
 6 -2 -9 7.93 6.26
 6 2 -9 -8.77 -3.58
 6 2 -9 -8.77 -3.58
 4 -2 -9 36.70 9.18
 -4 -2 9 -36.00 8.52
 -4 2 9 36.70 -9.18
 4 2 -9 -36.00 -8.52
 2 -2 -9 -0.23 3.44
 -2 -2 9 0.60 7.04
 2 -2 -9 -0.23 3.44
 -2 2 9 -0.23 -3.44
 2 2 -9 0.60 -7.04
 0 -2 9 8.17 1.87
 0 -2 -9 -8.97 0.43
 0 -2 -9 -8.97 0.43
 0 2 9 -8.97 -0.43
 0 2 -9 8.17 -1.87
 -2 -2 -9 -24.57 -4.09
 -2 -2 -9 -24.57 -4.09
 -2 2 -9 24.32 8.61
 2 2 9 -24.57 4.09
 -4 -2 -9 -11.99 -3.04
 -4 -2 -9 -11.99 -3.04
 -4 2 -9 10.94 4.82
 4 2 9 -11.99 3.04
 -6 -2 -9 7.69 0.30
 -6 -2 -9 7.69 0.30
 6 2 9 7.69 -0.30
 -6 2 -9 -6.35 3.55
 -8 -2 -9 10.98 2.15
 -8 -2 -9 10.98 2.15
 8 2 9 10.98 -2.15
 -8 2 -9 -10.86 3.50
 -10 -2 -9 2.74 -0.08
 -10 2 -9 -2.33 3.84
 10 2 9 2.74 0.08
 -12 -2 -9 -5.61 -0.78
 -12 2 -9 5.94 4.91
 12 2 9 -5.61 0.78
 -14 -2 -9 -4.49 -2.03
 14 2 9 -4.49 2.03
 -14 2 -9 4.32 3.08
 -16 -2 -9 -1.86 6.01
 -16 2 -9 2.50 6.90
 -18 -2 -9 -2.41 1.61
 -18 2 -9 2.77 5.38
 -20 -2 -9 -1.67 -1.49
 -20 2 -9 1.76 4.20
 -22 -2 -9 -0.06 -0.36
 -22 2 -9 1.18 0.69
 33 -3 -9 -0.48 2.68
 33 3 -9 -0.22 3.14
 31 -3 -9 -3.53 1.38
 31 3 -9 3.01 0.84
 29 -3 -9 -2.17 2.65
 29 3 -9 1.29 1.66
 27 -3 -9 -1.73 1.69
 27 3 -9 2.68 1.30
 25 -3 -9 -1.33 -5.53
 25 -3 -9 -1.33 -5.53
 25 3 -9 1.99 -3.95
 25 3 -9 1.99 -3.95
 23 -3 -9 -2.68 -1.33
 23 -3 -9 -2.68 -1.33
 23 3 -9 2.28 0.57
 23 3 -9 2.28 0.57
 21 -3 -9 -7.46 0.78
 21 -3 -9 -7.46 0.78
 21 3 -9 7.24 -1.84
 21 3 -9 7.24 -1.84
 19 -3 -9 6.87 -1.99
 19 3 -9 -7.42 1.51
 19 3 -9 -7.42 1.51
 17 -3 -9 18.44 -0.68
 17 -3 -9 18.44 -0.68
 17 3 -9 -18.43 1.46
 17 3 -9 -18.43 1.46
 -17 3 9 18.44 0.68
 15 -3 -9 18.31 6.02
 15 -3 -9 18.31 6.02
 15 3 -9 -17.56 -4.93
 15 3 -9 -17.56 -4.93
 13 -3 -9 8.93 2.84
 13 -3 -9 8.93 2.84
 13 3 -9 -7.99 -4.14
 11 -3 -9 -1.72 5.33
 11 -3 -9 -1.72 5.33
 11 3 -9 2.53 -6.10
 9 -3 -9 24.30 6.42
 9 -3 -9 24.30 6.42
 -9 -3 9 -25.41 -0.34
 9 3 -9 -25.41 0.34
 -9 3 9 24.30 -6.42
 7 -3 -9 3.19 5.26
 7 -3 -9 3.19 5.26
 7 3 -9 -2.64 -9.90
 -7 3 9 3.19 -5.26
 5 -3 -9 2.81 4.33
 -5 -3 9 -3.05 4.51
 5 -3 -9 2.81 4.33
 -5 3 9 2.81 -4.33
 5 3 -9 -3.05 -4.51
 5 3 -9 -3.05 -4.51
 3 -3 -9 -24.04 0.06
 3 -3 -9 -24.04 0.06
 -3 -3 9 22.64 -1.09
 3 3 -9 22.64 1.09
 -3 3 9 -24.04 -0.06
 3 3 -9 22.64 1.09
 -1 -3 9 -3.78 1.47
 1 -3 -9 3.84 4.00
 1 3 -9 -3.78 -1.47
 -1 3 9 3.84 -4.00
 -1 -3 -9 -1.94 -1.54
 1 -3 9 1.77 -1.63
 -1 3 -9 1.77 1.63
 1 3 9 -1.94 1.54
 3 -3 9 -2.39 4.33
 -3 -3 -9 3.92 1.97
 -3 -3 -9 3.92 1.97
 -3 3 -9 -2.39 -4.33
 3 3 9 3.92 -1.97
 -5 -3 -9 -3.84 0.09
 5 -3 9 4.35 0.34
 -5 -3 -9 -3.84 0.09
 5 3 9 -3.84 -0.09
 -5 3 -9 4.35 -0.34
 -7 -3 -9 -9.26 -5.68
 -7 -3 -9 -9.26 -5.68
 7 -3 9 9.05 -3.70
 7 3 9 -9.26 5.68
 -7 3 -9 9.05 3.70
 -9 -3 -9 -4.02 -2.77
 -9 -3 -9 -4.02 -2.77
 9 3 9 -4.02 2.77
 -9 3 -9 4.48 1.51
 -11 -3 -9 2.00 3.20
 -11 3 -9 -2.87 -1.23
 11 3 9 2.00 -3.20
 -13 -3 -9 3.97 4.55
 -13 3 -9 -3.61 -2.77
 13 3 9 3.97 -4.55
 -15 -3 -9 4.43 -0.33
 15 3 9 4.43 0.33
 -15 3 -9 -4.11 0.79
 -17 -3 -9 -0.13 1.72
 -17 3 -9 -0.06 -5.04
 17 3 9 -0.13 -1.72
 -19 -3 -9 -0.87 0.01
 -19 3 -9 1.72 -2.58
 -21 -3 -9 4.82 1.08
 -21 3 -9 -5.64 -0.50
 -32 -4 9 -1.73 4.93
 32 -4 -9 2.17 -2.74
 32 4 -9 -1.73 -4.93
 30 -4 -9 -0.90 2.81
 30 4 -9 2.06 -1.75
 28 -4 -9 1.86 3.72
 28 -4 -9 1.86 3.72
 -28 -4 9 -1.73 0.95
 28 4 -9 -1.73 -0.95
 26 -4 -9 0.74 5.84
 26 -4 -9 0.74 5.84
 26 4 -9 -1.20 5.38
 26 4 -9 -1.20 5.38
 24 -4 -9 -0.42 1.88
 24 -4 -9 -0.42 1.88
 24 4 -9 0.26 3.80
 24 4 -9 0.26 3.80
 22 -4 -9 0.58 -1.46
 22 -4 -9 0.58 -1.46
 22 4 -9 -0.03 2.77
 22 4 -9 -0.03 2.77
 20 -4 -9 -3.86 0.47
 20 4 -9 3.81 -0.08
 20 4 -9 3.81 -0.08
 18 -4 -9 -5.76 -1.80
 18 4 -9 6.97 1.09
 18 4 -9 6.97 1.09
 16 -4 -9 -3.79 -4.37
 16 -4 -9 -3.79 -4.37
 16 4 -9 3.42 7.23
 16 4 -9 3.42 7.23
 -16 4 9 -3.79 4.37
 14 -4 -9 -2.47 -3.17
 -14 -4 9 1.78 -4.04
 14 -4 -9 -2.47 -3.17
 14 4 -9 1.78 4.04
 14 4 -9 1.78 4.04
 12 -4 -9 4.24 2.23
 -12 -4 9 -4.98 -2.41
 12 -4 -9 4.24 2.23
 12 4 -9 -4.98 2.41
 12 4 -9 -4.98 2.41
 10 -4 -9 -17.69 4.17
 -10 -4 9 18.52 4.93
 10 -4 -9 -17.69 4.17
 10 4 -9 18.52 -4.93
 10 4 -9 18.52 -4.93
 -10 4 9 -17.69 -4.17
 8 -4 -9 -11.02 -2.23
 -8 -4 9 11.04 -3.20
 8 -4 -9 -11.02 -2.23
 8 4 -9 11.04 3.20
 8 4 -9 11.04 3.20
 -8 4 9 -11.02 2.23
 6 -4 -9 -9.20 2.71
 -6 -4 9 8.10 -0.06
 6 -4 -9 -9.20 2.71
 6 4 -9 8.10 0.06
 -6 4 9 -9.20 -2.71
 6 4 -9 8.10 0.06
 4 -4 -9 -4.38 -1.05
 4 -4 -9 -4.38 -1.05
 4 4 -9 5.14 0.02
 4 4 -9 5.14 0.02
 -4 4 9 -4.38 1.05
 2 -4 -9 10.55 0.33
 -2 -4 9 -10.17 -0.70
 2 -4 -9 10.55 0.33
 -2 4 9 10.55 -0.33
 2 4 -9 -10.17 0.70
 2 4 -9 -10.17 0.70
 0 -4 9 -6.41 5.48
 0 -4 -9 6.80 4.99
 0 -4 -9 6.80 4.99
 0 4 9 6.80 -4.99
 0 4 -9 -6.41 -5.48
 0 4 -9 -6.41 -5.48
 -2 -4 -9 14.01 3.06
 2 -4 9 -14.43 3.76
 -2 -4 -9 14.01 3.06
 2 4 9 14.01 -3.06
 -2 4 -9 -14.43 -3.76
 4 -4 9 -3.59 1.91
 -4 -4 -9 2.70 4.16
 -4 4 -9 -3.59 -1.91
 4 4 9 2.70 -4.16
 -6 -4 -9 -5.08 2.50
 6 -4 9 5.61 3.71
 6 4 9 -5.08 -2.50
 -6 4 -9 5.61 -3.71
 -8 -4 -9 -1.31 4.83
 -8 -4 -9 -1.31 4.83
 8 4 9 -1.31 -4.83
 -8 4 -9 1.06 -4.49
 -10 -4 -9 3.23 -2.92
 10 4 9 3.23 2.92
 -10 4 -9 -2.98 -0.20
 -12 -4 -9 5.99 -4.69
 12 4 9 5.99 4.69
 -12 4 -9 -5.22 0.01
 -14 -4 -9 1.13 -1.00
 -14 4 -9 -1.63 -1.25
 14 4 9 1.13 1.00
 -16 -4 -9 -2.88 0.20
 16 4 9 -2.88 -0.20
 -16 4 -9 4.34 -5.82
 -18 -4 -9 -1.34 0.11
 18 4 9 -1.34 -0.11
 -18 4 -9 0.07 1.37
 -20 -4 -9 -4.00 2.89
 20 4 9 -4.00 -2.89
 -20 4 -9 3.69 -0.37
 -22 -4 -9 -4.21 0.62
 -22 4 -9 4.70 -0.47
 33 -5 -9 -2.12 1.05
 -33 -5 9 1.99 -1.89
 33 5 -9 1.99 1.89
 31 -5 -9 -2.01 1.89
 -31 -5 9 1.98 -3.43
 31 5 -9 1.98 3.43
 -29 -5 9 -3.21 3.47
 29 -5 -9 3.92 -4.25
 29 -5 -9 3.92 -4.25
 29 5 -9 -3.21 -3.47
 27 -5 -9 0.03 -7.56
 27 -5 -9 0.03 -7.56
 -27 -5 9 0.07 2.30
 27 5 -9 0.07 -2.30
 27 5 -9 0.07 -2.30
 -25 -5 9 -5.23 3.21
 25 -5 -9 5.16 -2.17
 25 -5 -9 5.16 -2.17
 25 5 -9 -5.23 -3.21
 25 5 -9 -5.23 -3.21
 23 -5 -9 5.92 -0.63
 -23 -5 9 -6.44 0.97
 23 -5 -9 5.92 -0.63
 23 5 -9 -6.44 -0.97
 23 5 -9 -6.44 -0.97
 21 -5 -9 5.66 -1.44
 -21 -5 9 -4.79 -2.35
 21 -5 -9 5.66 -1.44
 21 5 -9 -4.79 2.35
 21 5 -9 -4.79 2.35
 19 -5 -9 -2.01 3.78
 -19 -5 9 1.45 -3.25
 19 5 -9 1.45 3.25
 19 5 -9 1.45 3.25
 17 -5 -9 -8.63 4.22
 17 5 -9 8.16 -1.73
 17 5 -9 8.16 -1.73
 15 -5 -9 -7.13 1.19
 -15 -5 9 7.38 2.24
 15 -5 -9 -7.13 1.19
 15 5 -9 7.38 -2.24
 -15 5 9 -7.13 -1.19
 15 5 -9 7.38 -2.24
 13 -5 -9 -4.76 1.91
 -13 -5 9 4.59 1.59
 13 -5 -9 -4.76 1.91
 -13 5 9 -4.76 -1.91
 13 5 -9 4.59 -1.59
 13 5 -9 4.59 -1.59
 -11 -5 9 -6.85 -3.38
 11 -5 -9 7.46 -3.08
 11 -5 -9 7.46 -3.08
 11 5 -9 -6.85 3.38
 -11 5 9 7.46 3.08
 11 5 -9 -6.85 3.38
 -9 -5 9 8.36 2.22
 9 -5 -9 -8.44 1.25
 9 -5 -9 -8.44 1.25
 -9 5 9 -8.44 -1.25
 9 5 -9 8.36 -2.22
 9 5 -9 8.36 -2.22
 7 -5 -9 -2.02 -0.55
 -7 -5 9 3.17 -4.38
 7 -5 -9 -2.02 -0.55
 7 5 -9 3.17 4.38
 -7 5 9 -2.02 0.55
 7 5 -9 3.17 4.38
 5 -5 -9 3.64 -4.92
 -5 -5 9 -4.09 -1.35
 5 -5 -9 3.64 -4.92
 -5 5 9 3.64 4.92
 5 5 -9 -4.09 1.35
 5 5 -9 -4.09 1.35
 3 -5 -9 17.34 -0.62
 3 -5 -9 17.34 -0.62
 -3 -5 9 -18.85 6.90
 -3 5 9 17.34 0.62
 3 5 -9 -18.85 -6.90
 3 5 -9 -18.85 -6.90
 1 -5 -9 7.81 -3.50
 1 -5 -9 7.81 -3.50
 1 5 -9 -8.48 -3.43
 -1 5 9 7.81 3.50
 1 5 -9 -8.48 -3.43
 -1 -5 -9 1.57 5.40
 1 -5 9 -2.10 4.95
 -1 -5 -9 1.57 5.40
 -1 5 -9 -2.10 -4.95
 -1 5 -9 -2.10 -4.95
 1 5 9 1.57 -5.40
 3 -5 9 13.60 1.49
 -3 -5 -9 -12.71 1.36
 -3 -5 -9 -12.71 1.36
 3 5 9 -12.71 -1.36
 -3 5 -9 13.60 -1.49
 -5 -5 -9 -0.88 3.63
 5 -5 9 1.01 1.55
 -5 -5 -9 -0.88 3.63
 -5 5 -9 1.01 -1.55
 5 5 9 -0.88 -3.63
 -7 5 -9 -10.18 -0.62
 7 5 9 10.22 0.51
 -9 -5 -9 2.71 0.46
 -9 -5 -9 2.71 0.46
 9 5 9 2.71 -0.46
 -9 5 -9 -1.51 -0.59
 -11 -5 -9 -5.96 5.09
 -11 5 -9 5.14 -3.22
 11 5 9 -5.96 -5.09
 -13 -5 -9 -7.76 6.76
 -13 5 -9 8.28 -3.45
 13 5 9 -7.76 -6.76
 -15 -5 -9 -3.48 -0.97
 -15 5 -9 3.04 4.82
 15 5 9 -3.48 0.97
 -17 -5 -9 2.56 0.68
 17 5 9 2.56 -0.68
 -17 5 -9 -1.85 4.19
 -19 -5 -9 5.68 -0.72
 19 5 9 5.68 0.72
 -21 -5 -9 3.99 -2.55
 21 5 9 3.99 2.55
 32 -6 -9 0.21 -1.96
 32 -6 -9 0.21 -1.96
 -32 -6 9 -0.05 0.18
 32 6 -9 -0.05 -0.18
 30 -6 -9 -1.37 -0.36
 30 -6 -9 -1.37 -0.36
 -30 -6 9 1.39 -3.20
 30 6 -9 1.39 3.20
 -28 -6 9 1.64 -5.53
 28 -6 -9 -1.86 1.10
 28 -6 -9 -1.86 1.10
 28 6 -9 1.64 5.53
 28 6 -9 1.64 5.53
 26 -6 -9 -1.09 -0.06
 26 -6 -9 -1.09 -0.06
 -26 -6 9 1.04 -2.13
 26 6 -9 1.04 2.13
 26 6 -9 1.04 2.13
 24 -6 -9 -3.70 -1.73
 24 -6 -9 -3.70 -1.73
 -24 -6 9 4.74 -0.11
 24 6 -9 4.74 0.11
 24 6 -9 4.74 0.11
 22 -6 -9 -4.26 1.63
 -22 -6 9 3.86 2.69
 22 -6 -9 -4.26 1.63
 22 6 -9 3.86 -2.69
 22 6 -9 3.86 -2.69
 -20 -6 9 0.19 3.47
 20 -6 -9 -0.28 -1.32
 20 -6 -9 -0.28 -1.32
 20 6 -9 0.19 -3.47
 20 6 -9 0.19 -3.47
 18 -6 -9 6.01 -1.21
 -18 -6 9 -5.33 -1.02
 18 -6 -9 6.01 -1.21
 18 6 -9 -5.33 1.02
 18 6 -9 -5.33 1.02
 16 -6 -9 4.61 0.25
 16 6 -9 -4.45 0.22
 -16 6 9 4.61 -0.25
 16 6 -9 -4.45 0.22
 14 -6 -9 -5.54 1.75
 -14 -6 9 6.12 -1.25
 14 -6 -9 -5.54 1.75
 -14 6 9 -5.54 -1.75
 14 6 -9 6.12 1.25
 14 6 -9 6.12 1.25
 -12 -6 9 14.82 4.34
 12 -6 -9 -14.79 2.11
 12 -6 -9 -14.79 2.11
 -12 6 9 -14.79 -2.11
 12 6 -9 14.82 -4.34
 12 6 -9 14.82 -4.34
 10 -6 -9 -2.36 -2.17
 10 -6 -9 -2.36 -2.17
 -10 -6 9 1.51 -4.36
 -10 6 9 -2.36 2.17
 10 6 -9 1.51 4.36
 10 6 -9 1.51 4.36
 -8 -6 9 -10.17 -4.07
 8 -6 -9 9.85 3.46
 8 -6 -9 9.85 3.46
 8 6 -9 -10.17 4.07
 -8 6 9 9.85 -3.46
 8 6 -9 -10.17 4.07
 6 -6 -9 5.48 -0.85
 -6 -6 9 -5.51 -4.35
 6 -6 -9 5.48 -0.85
 -6 6 9 5.48 0.85
 6 6 -9 -5.51 4.35
 6 6 -9 -5.51 4.35
 4 -6 -9 -7.85 -6.28
 4 -6 -9 -7.85 -6.28
 -4 -6 9 9.69 -11.27
 4 6 -9 9.69 11.27
 -4 6 9 -7.85 6.28
 4 6 -9 9.69 11.27
 2 -6 -9 -16.51 -5.90
 -2 -6 9 16.32 -7.29
 2 -6 -9 -16.51 -5.90
 -2 6 9 -16.51 5.90
 2 6 -9 16.32 7.29
 2 6 -9 16.32 7.29
 0 -6 -9 -12.34 -10.92
 0 -6 9 12.34 -8.19
 0 -6 -9 -12.34 -10.92
 0 6 -9 12.34 8.19
 0 6 9 -12.34 10.92
 0 6 -9 12.34 8.19
 2 -6 9 -1.28 1.35
 -2 -6 -9 1.01 -1.20
 -2 -6 -9 1.01 -1.20
 -2 6 -9 -1.28 -1.35
 2 6 9 1.01 1.20
 4 -6 9 -8.22 2.36
 -4 -6 -9 6.59 0.63
 -4 -6 -9 6.59 0.63
 -4 6 -9 -8.22 -2.36
 4 6 9 6.59 -0.63
 -6 -6 -9 -0.15 -1.62
 6 -6 9 0.64 -1.66
 -6 -6 -9 -0.15 -1.62
 -6 6 -9 0.64 1.66
 -6 6 -9 0.64 1.66
 6 6 9 -0.15 1.62
 -8 -6 -9 -6.35 -0.77
 -8 -6 -9 -6.35 -0.77
 8 -6 9 5.31 -4.37
 -8 6 -9 5.31 4.37
 8 6 9 -6.35 0.77
 -8 6 -9 5.31 4.37
 -10 -6 -9 -3.21 -0.63
 -10 -6 -9 -3.21 -0.63
 -10 6 -9 3.44 2.25
 10 6 9 -3.21 0.63
 -12 -6 -9 4.16 -7.63
 -12 6 -9 -3.17 8.39
 12 6 9 4.16 7.63
 -14 -6 -9 3.99 -0.85
 14 6 9 3.99 0.85
 -16 -6 -9 3.78 1.72
 16 6 9 3.78 -1.72
 -18 -6 -9 -2.67 -1.06
 18 6 9 -2.67 1.06
 -20 -6 -9 -3.29 -0.17
 20 6 9 -3.29 0.17
 31 -7 -9 1.37 -2.95
 -31 -7 9 -2.20 5.42
 31 -7 -9 1.37 -2.95
 31 7 -9 -2.20 -5.42
 29 -7 -9 -1.88 -3.33
 29 -7 -9 -1.88 -3.33
 -29 -7 9 0.51 5.74
 29 7 -9 0.51 -5.74
 29 7 -9 0.51 -5.74
 27 -7 -9 -2.78 0.99
 -27 -7 9 2.75 6.29
 27 -7 -9 -2.78 0.99
 27 7 -9 2.75 -6.29
 27 7 -9 2.75 -6.29
 -25 -7 9 -0.20 3.03
 25 -7 -9 0.02 -1.15
 25 -7 -9 0.02 -1.15
 25 7 -9 -0.20 -3.03
 25 7 -9 -0.20 -3.03
 -23 -7 9 1.30 0.34
 23 -7 -9 -1.86 -2.83
 23 -7 -9 -1.86 -2.83
 23 7 -9 1.30 -0.34
 23 7 -9 1.30 -0.34
 21 -7 -9 -1.96 -4.00
 -21 -7 9 2.37 0.43
 21 -7 -9 -1.96 -4.00
 21 7 -9 2.37 -0.43
 21 7 -9 2.37 -0.43
 19 -7 -9 -3.28 -5.51
 -19 -7 9 2.88 4.33
 19 -7 -9 -3.28 -5.51
 19 7 -9 2.88 -4.33
 19 7 -9 2.88 -4.33
 17 -7 -9 -6.73 -0.72
 -17 -7 9 6.32 3.53
 17 -7 -9 -6.73 -0.72
 17 7 -9 6.32 -3.53
 17 7 -9 6.32 -3.53
 15 -7 -9 -3.91 0.11
 -15 -7 9 4.58 3.96
 15 -7 -9 -3.91 0.11
 15 7 -9 4.58 -3.96
 15 7 -9 4.58 -3.96
 -15 7 9 -3.91 -0.11
 13 -7 -9 2.92 -1.79
 -13 -7 9 -3.16 -2.32
 13 -7 -9 2.92 -1.79
 13 7 -9 -3.16 2.32
 -13 7 9 2.92 1.79
 13 7 -9 -3.16 2.32
 11 -7 -9 0.51 -0.46
 11 -7 -9 0.51 -0.46
 -11 -7 9 0.39 1.96
 11 7 -9 0.39 -1.96
 11 7 -9 0.39 -1.96
 -11 7 9 0.51 0.46
 9 -7 -9 -2.68 -4.93
 -9 -7 9 3.15 5.76
 9 -7 -9 -2.68 -4.93
 -9 7 9 -2.68 4.93
 9 7 -9 3.15 -5.76
 9 7 -9 3.15 -5.76
 7 -7 -9 -8.43 -13.56
 7 -7 -9 -8.43 -13.56
 -7 -7 9 8.93 11.28
 7 7 -9 8.93 -11.28
 -7 7 9 -8.43 13.56
 7 7 -9 8.93 -11.28
 5 -7 -9 0.88 -6.52
 -5 -7 9 -2.94 6.51
 5 -7 -9 0.88 -6.52
 -5 -7 9 -2.94 6.51
 5 7 -9 -2.94 -6.51
 -5 7 9 0.88 6.52
 5 7 -9 -2.94 -6.51
 3 -7 -9 0.88 -1.58
 -3 -7 9 -1.89 2.96
 3 -7 -9 0.88 -1.58
 3 7 -9 -1.89 -2.96
 -3 7 9 0.88 1.58
 1 -7 -9 8.56 5.00
 -1 -7 9 -7.66 5.88
 1 -7 -9 8.56 5.00
 -1 7 9 8.56 -5.00
 -1 -7 -9 3.08 -0.99
 -1 -7 -9 3.08 -0.99
 1 -7 9 -3.56 -0.67
 -1 7 -9 -3.56 0.67
 1 7 9 3.08 0.99
 -1 7 -9 -3.56 0.67
 3 -7 9 3.34 -5.13
 -3 -7 -9 -2.19 -5.70
 -3 -7 -9 -2.19 -5.70
 -3 7 -9 3.34 5.13
 3 7 9 -2.19 5.70
 -5 -7 -9 -4.73 0.20
 5 -7 9 4.94 0.50
 -5 -7 -9 -4.73 0.20
 -5 7 -9 4.94 -0.50
 5 7 9 -4.73 -0.20
 7 -7 9 4.86 7.14
 -7 -7 -9 -5.09 5.80
 -7 -7 -9 -5.09 5.80
 7 7 9 -5.09 -5.80
 -7 7 -9 4.86 -7.14
 -9 -7 -9 2.65 -0.27
 -9 -7 -9 2.65 -0.27
 -9 7 -9 -2.52 -2.74
 9 7 9 2.65 0.27
 -11 -7 -9 1.85 3.97
 11 7 9 1.85 -3.97
 -11 7 -9 -2.08 -5.31
 -13 -7 -9 1.78 -0.78
 -13 7 -9 -2.01 -2.77
 13 7 9 1.78 0.78
 -15 -7 -9 0.02 -2.28
 -15 7 -9 -0.64 2.14
 15 7 9 0.02 2.28
 -17 -7 -9 -1.90 -3.93
 17 7 9 -1.90 3.93
 -17 7 -9 1.22 -1.68
 -19 -7 -9 1.09 -1.78
 19 7 9 1.09 1.78
 -19 7 -9 -0.63 -2.82
 30 -8 -9 2.62 3.64
 30 -8 -9 2.62 3.64
 -30 -8 9 -2.02 -4.37
 30 8 -9 -2.02 4.37
 30 8 -9 -2.02 4.37
 28 -8 -9 4.06 1.50
 28 -8 -9 4.06 1.50
 -28 -8 9 -2.78 -2.48
 28 8 -9 -2.78 2.48
 28 8 -9 -2.78 2.48
 -26 -8 9 0.00 -1.78
 26 -8 -9 0.01 0.45
 26 -8 -9 0.01 0.45
 26 8 -9 0.00 1.78
 26 8 -9 0.00 1.78
 -24 -8 9 3.49 -0.93
 24 -8 -9 -2.58 3.38
 24 -8 -9 -2.58 3.38
 24 8 -9 3.49 0.93
 24 8 -9 3.49 0.93
 22 -8 -9 0.24 2.23
 -22 -8 9 -0.75 1.15
 22 -8 -9 0.24 2.23
 22 8 -9 -0.75 -1.15
 22 8 -9 -0.75 -1.15
 20 -8 -9 -1.95 3.28
 20 -8 -9 -1.95 3.28
 -20 -8 9 2.60 -2.81
 20 8 -9 2.60 2.81
 20 8 -9 2.60 2.81
 -18 -8 9 1.53 -0.26
 18 -8 -9 -1.42 1.53
 18 -8 -9 -1.42 1.53
 18 8 -9 1.53 0.26
 18 8 -9 1.53 0.26
 -16 -8 9 0.37 -2.38
 16 -8 -9 0.01 -2.85
 16 -8 -9 0.01 -2.85
 16 8 -9 0.37 2.38
 16 8 -9 0.37 2.38
 -14 -8 9 -1.19 -2.15
 14 -8 -9 0.84 -0.98
 14 -8 -9 0.84 -0.98
 14 8 -9 -1.19 2.15
 14 8 -9 -1.19 2.15
 -14 8 9 0.84 0.98
 -12 -8 9 0.24 -3.77
 12 -8 -9 -0.34 0.67
 12 -8 -9 -0.34 0.67
 12 8 -9 0.24 3.77
 -12 8 9 -0.34 -0.67
 12 8 -9 0.24 3.77
 10 -8 -9 -1.63 1.50
 -10 -8 9 0.09 -8.45
 10 -8 -9 -1.63 1.50
 10 8 -9 0.09 8.45
 10 8 -9 0.09 8.45
 -10 8 9 -1.63 -1.50
 8 -8 -9 2.22 0.49
 8 -8 -9 2.22 0.49
 -8 -8 9 -2.90 -8.38
 -8 8 9 2.22 -0.49
 8 8 -9 -2.90 8.38
 8 8 -9 -2.90 8.38
 6 -8 -9 0.11 8.17
 -6 -8 9 0.28 -5.80
 6 -8 -9 0.11 8.17
 6 8 -9 0.28 5.80
 -6 8 9 0.11 -8.17
 4 -8 -9 4.28 12.36
 -4 -8 9 -1.42 6.69
 4 -8 -9 4.28 12.36
 -4 8 9 4.28 -12.36
 4 8 -9 -1.42 -6.69
 -2 -8 9 -1.61 0.83
 2 -8 -9 1.96 -0.62
 2 -8 -9 1.96 -0.62
 2 8 -9 -1.61 -0.83
 -2 8 9 1.96 0.62
 0 -8 -9 -4.07 1.04
 0 -8 -9 -4.07 1.04
 0 -8 9 3.89 1.26
 0 8 9 -4.07 -1.04
 2 -8 9 0.57 4.09
 -2 -8 -9 -0.05 0.22
 -2 -8 -9 -0.05 0.22
 -2 8 -9 0.57 -4.09
 2 8 9 -0.05 -0.22
 -4 -8 -9 3.21 -1.13
 -4 -8 -9 3.21 -1.13
 4 -8 9 -3.12 2.41
 -4 8 -9 -3.12 -2.41
 4 8 9 3.21 1.13
 6 -8 9 -6.00 -3.38
 -6 -8 -9 7.00 -7.99
 -6 -8 -9 7.00 -7.99
 -6 8 -9 -6.00 3.38
 6 8 9 7.00 7.99
 -8 -8 -9 5.35 -3.63
 -8 -8 -9 5.35 -3.63
 -8 8 -9 -4.44 -0.20
 8 8 9 5.35 3.63
 -10 -8 -9 -1.12 -0.21
 -10 -8 -9 -1.12 -0.21
 10 8 9 -1.12 0.21
 -10 8 -9 1.30 2.88
 -12 -8 -9 -4.96 -0.27
 12 8 9 -4.96 0.27
 -12 8 -9 5.12 0.74
 -14 -8 -9 -3.88 2.45
 14 8 9 -3.88 -2.45
 -14 8 -9 3.35 -0.89
 -16 -8 -9 -1.66 0.66
 16 8 9 -1.66 -0.66
 -16 8 -9 1.75 2.49
 -18 -8 -9 0.22 4.29
 -18 8 -9 -0.66 4.99
 18 8 9 0.22 -4.29
 29 -9 -9 -2.09 -2.39
 -29 -9 9 1.42 3.20
 29 -9 -9 -2.09 -2.39
 29 9 -9 1.42 -3.20
 29 9 -9 1.42 -3.20
 -27 -9 9 -2.02 0.66
 27 -9 -9 0.94 -1.15
 27 -9 -9 0.94 -1.15
 27 9 -9 -2.02 -0.66
 27 9 -9 -2.02 -0.66
 25 -9 -9 1.78 -1.36
 25 -9 -9 1.78 -1.36
 -25 -9 9 -2.63 0.28
 25 9 -9 -2.63 -0.28
 25 9 -9 -2.63 -0.28
 -23 -9 9 -0.03 -1.65
 23 -9 -9 0.60 0.29
 23 -9 -9 0.60 0.29
 23 9 -9 -0.03 1.65
 23 9 -9 -0.03 1.65
 -21 -9 9 -0.14 1.26
 21 -9 -9 1.14 -0.68
 21 -9 -9 1.14 -0.68
 21 9 -9 -0.14 -1.26
 21 9 -9 -0.14 -1.26
 -19 -9 9 -2.42 -0.56
 19 -9 -9 2.62 -0.16
 19 -9 -9 2.62 -0.16
 19 9 -9 -2.42 0.56
 19 9 -9 -2.42 0.56
 -17 -9 9 -4.31 1.21
 17 -9 -9 4.98 0.79
 17 -9 -9 4.98 0.79
 17 9 -9 -4.31 -1.21
 17 9 -9 -4.31 -1.21
 -15 -9 9 -4.69 6.84
 15 -9 -9 4.62 4.98
 15 -9 -9 4.62 4.98
 15 9 -9 -4.69 -6.84
 15 9 -9 -4.69 -6.84
 -13 -9 9 -1.86 8.40
 13 -9 -9 2.52 0.32
 13 -9 -9 2.52 0.32
 13 9 -9 -1.86 -8.40
 13 9 -9 -1.86 -8.40
 -13 9 9 2.52 -0.32
 11 -9 -9 2.62 -7.10
 11 -9 -9 2.62 -7.10
 -11 -9 9 -1.45 9.75
 -11 9 9 2.62 7.10
 11 9 -9 -1.45 -9.75
 11 9 -9 -1.45 -9.75
 9 -9 -9 -0.69 -1.59
 9 -9 -9 -0.69 -1.59
 -9 -9 9 0.84 8.40
 9 9 -9 0.84 -8.40
 -9 9 9 -0.69 1.59
 7 -9 -9 0.84 4.53
 -7 -9 9 -0.51 2.03
 7 -9 -9 0.84 4.53
 -7 9 9 0.84 -4.53
 7 9 -9 -0.51 -2.03
 5 -9 -9 -6.42 -5.28
 5 -9 -9 -6.42 -5.28
 -5 -9 9 5.42 -2.33
 5 9 -9 5.42 2.33
 -5 9 9 -6.42 5.28
 -3 -9 9 4.56 -2.59
 3 -9 -9 -5.76 -2.87
 3 -9 -9 -5.76 -2.87
 -3 9 9 -5.76 2.87
 3 9 -9 4.56 2.59
 -1 -9 9 2.37 -4.86
 1 -9 -9 -1.79 1.03
 1 -9 -9 -1.79 1.03
 -1 9 9 -1.79 -1.03
 1 9 -9 2.37 4.86
 1 -9 9 -2.71 -5.46
 -1 -9 -9 1.17 -0.41
 -1 -9 -9 1.17 -0.41
 1 9 9 1.17 0.41
 -1 9 -9 -2.71 5.46
 -3 -9 -9 1.93 -6.89
 -3 -9 -9 1.93 -6.89
 3 -9 9 -2.90 -1.13
 3 9 9 1.93 6.89
 -3 9 -9 -2.90 1.13
 -5 -9 -9 -1.33 0.53
 -5 -9 -9 -1.33 0.53
 5 -9 9 -0.08 2.56
 -5 9 -9 -0.08 -2.56
 5 9 9 -1.33 -0.53
 -7 -9 -9 -6.10 1.80
 7 -9 9 5.24 2.58
 -7 -9 -9 -6.10 1.80
 7 9 9 -6.10 -1.80
 -7 9 -9 5.24 -2.58
 -9 -9 -9 -4.78 -1.52
 -9 -9 -9 -4.78 -1.52
 9 9 9 -4.78 1.52
 -9 9 -9 4.66 -3.82
 -11 -9 -9 1.36 -6.26
 -11 9 -9 -2.83 -6.20
 11 9 9 1.36 6.26
 -13 -9 -9 0.34 -4.40
 -13 9 -9 -0.75 -1.99
 13 9 9 0.34 4.40
 -15 -9 -9 1.99 -4.49
 15 9 9 1.99 4.49
 -15 9 -9 -2.09 -5.29
 -17 -9 -9 2.76 -3.55
 17 9 9 2.76 3.55
 -17 9 -9 -2.51 -4.60
 -28 -10 9 0.40 -1.05
 28 -10 -9 -0.64 1.61
 28 10 -9 0.40 1.05
 26 -10 -9 -1.05 1.14
 26 -10 -9 -1.05 1.14
 -26 -10 9 2.10 0.28
 26 10 -9 2.10 -0.28
 24 -10 -9 2.54 -4.05
 -24 -10 9 -2.40 5.86
 24 -10 -9 2.54 -4.05
 24 10 -9 -2.40 -5.86
 24 10 -9 -2.40 -5.86
 -22 -10 9 -2.63 -0.60
 22 -10 -9 2.77 -1.46
 22 -10 -9 2.77 -1.46
 22 10 -9 -2.63 0.60
 22 10 -9 -2.63 0.60
 20 -10 -9 3.58 1.40
 -20 -10 9 -3.56 1.49
 20 -10 -9 3.58 1.40
 20 10 -9 -3.56 -1.49
 20 10 -9 -3.56 -1.49
 18 -10 -9 -0.97 -0.97
 -18 -10 9 1.41 -1.32
 18 -10 -9 -0.97 -0.97
 18 10 -9 1.41 1.32
 18 10 -9 1.41 1.32
 16 -10 -9 0.47 -6.02
 16 -10 -9 0.47 -6.02
 -16 -10 9 -0.73 -5.78
 16 10 -9 -0.73 5.78
 14 -10 -9 -0.30 -12.12
 -14 -10 9 -0.40 -14.97
 14 -10 -9 -0.30 -12.12
 14 10 -9 -0.40 14.97
 12 -10 -9 0.00 1.03
 12 -10 -9 0.00 1.03
 -12 -10 9 -0.90 -14.65
 12 10 -9 -0.90 14.65
 -12 10 9 0.00 -1.03
 10 -10 -9 2.36 6.23
 -10 -10 9 -2.04 -9.90
 10 -10 -9 2.36 6.23
 10 10 -9 -2.04 9.90
 -10 10 9 2.36 -6.23
 8 -10 -9 -1.23 -0.37
 8 -10 -9 -1.23 -0.37
 -8 -10 9 2.29 -2.44
 8 10 -9 2.29 2.44
 -8 10 9 -1.23 0.37
 6 -10 -9 2.06 -0.07
 6 -10 -9 2.06 -0.07
 -6 -10 9 -2.32 2.36
 -6 10 9 2.06 0.07
 6 10 -9 -2.32 -2.36
 -4 -10 9 -3.92 -1.64
 4 -10 -9 4.59 -2.02
 4 -10 -9 4.59 -2.02
 -4 10 9 4.59 2.02
 4 10 -9 -3.92 1.64
 2 -10 -9 3.28 0.92
 -2 -10 9 -3.65 0.36
 2 -10 -9 3.28 0.92
 -2 10 9 3.28 -0.92
 2 10 -9 -3.65 -0.36
 0 -10 -9 2.05 -9.52
 0 -10 9 -2.13 10.69
 0 -10 -9 2.05 -9.52
 0 10 -9 -2.13 -10.69
 0 10 9 2.05 9.52
 -2 -10 -9 -2.55 1.33
 -2 -10 -9 -2.55 1.33
 2 -10 9 3.16 4.13
 -2 10 -9 3.16 -4.13
 2 10 9 -2.55 -1.33
 -4 -10 -9 -3.83 2.50
 -4 -10 -9 -3.83 2.50
 4 -10 9 2.78 -1.80
 -4 10 -9 2.78 1.80
 4 10 9 -3.83 -2.50
 6 -10 9 -0.22 -2.20
 -6 -10 -9 0.60 -2.73
 -6 -10 -9 0.60 -2.73
 6 10 9 0.60 2.73
 -6 10 -9 -0.22 2.20
 -8 -10 -9 4.82 -3.26
 -8 -10 -9 4.82 -3.26
 -8 10 -9 -7.05 3.79
 8 10 9 4.82 3.26
 -10 -10 -9 2.83 0.22
 -10 -10 -9 2.83 0.22
 10 10 9 2.83 -0.22
 -10 10 -9 -2.63 1.45
 -12 -10 -9 2.82 1.65
 12 10 9 2.82 -1.65
 -12 10 -9 -2.68 0.24
 -14 -10 -9 0.98 -0.52
 -14 10 -9 -0.65 -0.96
 14 10 9 0.98 0.52
 -16 -10 -9 -1.62 1.62
 16 10 9 -1.62 -1.62
 -16 10 -9 1.85 1.24
 27 -11 -9 0.55 -0.39
 -27 -11 9 -1.34 -0.52
 27 11 -9 -1.34 0.52
 25 -11 -9 0.13 1.34
 -25 -11 9 -0.60 -2.66
 25 11 -9 -0.60 2.66
 -23 -11 9 -0.22 -1.85
 23 -11 -9 -0.68 3.61
 23 11 -9 -0.22 1.85
 21 -11 -9 -3.39 -1.51
 -21 -11 9 3.51 0.73
 21 -11 -9 -3.39 -1.51
 21 11 -9 3.51 -0.73
 -19 -11 9 -2.07 -5.46
 19 -11 -9 1.04 -5.14
 19 -11 -9 1.04 -5.14
 19 11 -9 -2.07 5.46
 -17 -11 9 2.32 -2.93
 17 -11 -9 -1.74 -2.42
 17 -11 -9 -1.74 -2.42
 17 11 -9 2.32 2.93
 15 -11 -9 -1.32 3.01
 -15 -11 9 2.47 0.54
 15 -11 -9 -1.32 3.01
 15 11 -9 2.47 -0.54
 13 -11 -9 0.60 5.32
 -13 -11 9 0.46 11.93
 13 -11 -9 0.60 5.32
 13 11 -9 0.46 -11.93
 -11 -11 9 -0.86 12.35
 11 -11 -9 1.18 -8.54
 11 -11 -9 1.18 -8.54
 11 11 -9 -0.86 -12.35
 -11 11 9 1.18 8.54
 9 -11 -9 2.90 -3.78
 -9 -11 9 -3.32 2.95
 9 -11 -9 2.90 -3.78
 9 11 -9 -3.32 -2.95
 -9 11 9 2.90 3.78
 7 -11 -9 2.09 -3.72
 -7 -11 9 -2.37 -2.48
 7 -11 -9 2.09 -3.72
 7 11 -9 -2.37 2.48
 -7 11 9 2.09 3.72
 -5 -11 9 0.40 -2.77
 5 -11 -9 -0.13 0.65
 5 -11 -9 -0.13 0.65
 -5 11 9 -0.13 -0.65
 5 11 -9 0.40 2.77
 3 -11 -9 -1.82 -0.78
 3 -11 -9 -1.82 -0.78
 -3 -11 9 1.10 2.27
 3 11 -9 1.10 -2.27
 -3 11 9 -1.82 0.78
 1 -11 -9 -0.87 3.30
 1 -11 -9 -0.87 3.30
 -1 -11 9 1.14 -6.40
 1 11 -9 1.14 6.40
 -1 11 9 -0.87 -3.30
 -1 -11 -9 -0.21 9.98
 1 -11 9 0.87 -8.98
 -1 -11 -9 -0.21 9.98
 1 11 9 -0.21 -9.98
 -1 11 -9 0.87 8.98
 -3 -11 -9 0.80 1.98
 -3 -11 -9 0.80 1.98
 3 -11 9 -0.55 -0.91
 3 11 9 0.80 -1.98
 -3 11 -9 -0.55 0.91
 5 -11 9 -3.71 1.01
 -5 -11 -9 3.62 -1.55
 -5 -11 -9 3.62 -1.55
 5 11 9 3.62 1.55
 -5 11 -9 -3.71 -1.01
 -7 -11 -9 0.17 -0.38
 -7 -11 -9 0.17 -0.38
 7 -11 9 -0.27 1.73
 7 11 9 0.17 0.38
 -7 11 -9 -0.27 -1.73
 -9 -11 -9 -1.37 1.28
 -9 -11 -9 -1.37 1.28
 9 11 9 -1.37 -1.28
 -9 11 -9 1.93 -0.57
 -11 -11 -9 -2.14 0.87
 11 11 9 -2.14 -0.87
 -11 11 -9 1.89 -0.19
 -13 -11 -9 -0.66 2.38
 13 11 9 -0.66 -2.38
 -13 11 -9 1.26 0.97
 -15 -11 -9 -0.60 1.23
 15 11 9 -0.60 -1.23
 -15 11 -9 0.37 2.61
 26 -12 -9 -0.12 0.65
 24 -12 -9 -0.82 2.02
 -24 -12 9 1.28 -1.89
 24 12 -9 1.28 1.89
 -22 -12 9 -5.34 -1.39
 22 -12 -9 5.57 -0.26
 22 12 -9 -5.34 1.39
 -20 -12 9 -1.12 3.18
 20 -12 -9 2.00 3.91
 20 12 -9 -1.12 -3.18
 -18 -12 9 -2.80 7.69
 18 -12 -9 4.78 8.36
 18 12 -9 -2.80 -7.69
 16 -12 -9 -0.40 5.48
 -16 -12 9 -0.49 3.54
 16 12 -9 -0.49 -3.54
 14 -12 -9 -1.92 0.22
 -14 -12 9 1.72 -0.39
 14 -12 -9 -1.92 0.22
 14 12 -9 1.72 0.39
 12 -12 -9 -0.40 1.17
 12 -12 -9 -0.40 1.17
 -12 -12 9 -0.19 -8.06
 12 12 -9 -0.19 8.06
 10 -12 -9 -0.88 7.57
 10 -12 -9 -0.88 7.57
 -10 -12 9 0.62 -6.61
 10 12 -9 0.62 6.61
 -10 12 9 -0.88 -7.57
 8 -12 -9 1.06 2.62
 -8 -12 9 -0.90 4.02
 8 -12 -9 1.06 2.62
 8 12 -9 -0.90 -4.02
 -8 12 9 1.06 -2.62
 6 -12 -9 2.74 0.05
 -6 -12 9 -3.28 2.80
 6 -12 -9 2.74 0.05
 -6 12 9 2.74 -0.05
 6 12 -9 -3.28 -2.80
 -4 -12 9 -4.61 -0.22
 4 -12 -9 4.93 -0.64
 4 -12 -9 4.93 -0.64
 -4 12 9 4.93 0.64
 4 12 -9 -4.61 0.22
 2 -12 -9 2.02 1.04
 -2 -12 9 -2.35 0.82
 2 -12 -9 2.02 1.04
 -2 12 9 2.02 -1.04
 2 12 -9 -2.35 -0.82
 0 -12 -9 3.78 -1.70
 0 -12 -9 3.78 -1.70
 0 -12 9 -3.68 4.63
 0 12 -9 -3.68 -4.63
 0 12 9 3.78 1.70
 -2 -12 -9 4.71 -5.43
 2 -12 9 -5.05 0.87
 -2 -12 -9 4.71 -5.43
 2 12 9 4.71 5.43
 -2 12 -9 -5.05 -0.87
 -4 -12 -9 0.19 4.41
 -4 -12 -9 0.19 4.41
 4 -12 9 1.41 -1.00
 4 12 9 0.19 -4.41
 -4 12 -9 1.41 1.00
 -6 -12 -9 -2.35 3.35
 -6 -12 -9 -2.35 3.35
 6 -12 9 1.52 -2.20
 -6 12 -9 1.52 2.20
 6 12 9 -2.35 -3.35
 -8 -12 -9 0.79 -0.26
 -8 -12 -9 0.79 -0.26
 -8 12 -9 0.02 -1.10
 8 12 9 0.79 0.26
 -10 -12 -9 2.86 -1.51
 -10 -12 -9 2.86 -1.51
 10 12 9 2.86 1.51
 -10 12 -9 -3.18 2.65
 -12 -12 -9 0.10 -2.84
 -12 12 -9 0.04 2.54
 12 12 9 0.10 2.84
 -14 -12 -9 3.54 -1.93
 14 12 9 3.54 1.93
 -14 12 -9 -4.28 -0.30
 23 -13 -9 -1.38 -1.04
 -23 -13 9 0.69 0.88
 23 13 -9 0.69 -0.88
 21 -13 -9 -2.90 -0.06
 -21 -13 9 2.11 -4.56
 21 13 -9 2.11 4.56
 19 -13 -9 -3.00 -0.61
 -19 -13 9 1.48 -6.58
 19 13 -9 1.48 6.58
 -17 -13 9 -3.23 -6.68
 17 -13 -9 2.94 -6.52
 17 13 -9 -3.23 6.68
 15 -13 -9 4.04 -3.41
 -15 -13 9 -3.32 -0.69
 15 13 -9 -3.32 0.69
 -13 -13 9 -2.89 -1.45
 13 -13 -9 4.16 -3.62
 13 13 -9 -2.89 1.45
 11 -13 -9 -2.01 -1.95
 -11 -13 9 2.51 1.73
 11 13 -9 2.51 -1.73
 9 -13 -9 -1.62 -7.23
 -9 -13 9 2.40 0.09
 -9 13 9 -1.62 7.23
 9 13 -9 2.40 -0.09
 7 -13 -9 -2.32 1.47
 -7 -13 9 2.37 -4.74
 7 -13 -9 -2.32 1.47
 7 13 -9 2.37 4.74
 -7 13 9 -2.32 -1.47
 5 -13 -9 -4.36 0.48
 5 -13 -9 -4.36 0.48
 -5 -13 9 4.14 1.02
 -5 13 9 -4.36 -0.48
 5 13 -9 4.14 -1.02
 3 -13 -9 -1.53 -0.02
 3 -13 -9 -1.53 -0.02
 -3 -13 9 1.70 0.00
 -3 13 9 -1.53 0.02
 3 13 -9 1.70 0.00
 1 -13 -9 -1.13 -0.20
 1 -13 -9 -1.13 -0.20
 -1 -13 9 1.38 0.11
 1 13 -9 1.38 -0.11
 -1 13 9 -1.13 0.20
 1 -13 9 1.86 -0.67
 -1 -13 -9 -2.83 2.39
 -1 -13 -9 -2.83 2.39
 1 13 9 -2.83 -2.39
 -1 13 -9 1.86 0.67
 -3 -13 -9 -1.39 0.12
 3 -13 9 0.03 -1.88
 -3 -13 -9 -1.39 0.12
 3 13 9 -1.39 -0.12
 -3 13 -9 0.03 1.88
 5 -13 9 -0.39 0.23
 -5 -13 -9 -0.01 -0.62
 -5 -13 -9 -0.01 -0.62
 5 13 9 -0.01 0.62
 -5 13 -9 -0.39 -0.23
 -7 -13 -9 -0.48 2.30
 -7 -13 -9 -0.48 2.30
 -7 13 -9 0.47 5.34
 7 13 9 -0.48 -2.30
 -9 -13 -9 -4.75 -0.01
 -9 -13 -9 -4.75 -0.01
 -9 13 -9 4.69 -0.84
 9 13 9 -4.75 0.01
 -11 -13 -9 -1.13 2.22
 11 13 9 -1.13 -2.22
 -11 13 -9 0.87 -1.10
 20 -14 -9 0.55 0.42
 -20 -14 9 -0.15 2.75
 20 14 -9 -0.15 -2.75
 18 -14 -9 -3.83 -0.78
 -18 -14 9 4.15 5.48
 18 14 -9 4.15 -5.48
 -16 -14 9 3.84 3.11
 16 -14 -9 -4.02 4.83
 16 14 -9 3.84 -3.11
 14 -14 -9 -1.26 6.53
 -14 -14 9 2.03 6.32
 14 14 -9 2.03 -6.32
 -12 -14 9 -0.52 4.60
 12 -14 -9 0.14 4.08
 12 14 -9 -0.52 -4.60
 10 -14 -9 4.94 3.82
 -10 -14 9 -4.15 1.14
 10 14 -9 -4.15 -1.14
 -8 -14 9 -0.18 -2.22
 8 -14 -9 -0.60 0.96
 8 14 -9 -0.18 2.22
 -8 14 9 -0.60 -0.96
 6 -14 -9 0.34 0.49
 -6 -14 9 0.02 -0.92
 6 14 -9 0.02 0.92
 -6 14 9 0.34 -0.49
 -4 -14 9 0.78 -1.52
 4 -14 -9 -0.82 1.39
 -4 14 9 -0.82 -1.39
 4 14 -9 0.78 1.52
 2 -14 -9 -2.87 1.20
 -2 -14 9 2.14 -4.10
 2 14 -9 2.14 4.10
 -2 14 9 -2.87 -1.20
 0 -14 9 0.75 -4.02
 0 -14 -9 -1.36 0.53
 0 14 9 -1.36 -0.53
 0 14 -9 0.75 4.02
 2 -14 9 2.12 -1.50
 -2 -14 -9 -0.88 0.94
 -2 14 -9 2.12 1.50
 2 14 9 -0.88 -0.94
 -4 -14 -9 -0.99 -4.02
 -4 -14 -9 -0.99 -4.02
 4 -14 9 1.40 -3.62
 4 14 9 -0.99 4.02
 -4 14 -9 1.40 3.62
 -6 -14 -9 -1.24 -4.51
 -6 -14 -9 -1.24 -4.51
 6 14 9 -1.24 4.51
 -6 14 -9 3.40 -3.67
 -8 -14 -9 2.50 0.69
 -8 -14 -9 2.50 0.69
 8 14 9 2.50 -0.69
 -8 14 -9 -1.93 -0.24
 17 -15 -9 1.09 4.19
 -17 -15 9 -0.93 1.44
 17 15 -9 -0.93 -1.44
 15 -15 -9 2.94 -2.94
 -15 -15 9 -2.69 -1.66
 15 15 -9 -2.69 1.66
 13 -15 -9 -3.05 -3.15
 -13 -15 9 1.94 -5.93
 13 15 -9 1.94 5.93
 -11 -15 9 4.05 -2.73
 11 -15 -9 -3.59 -2.38
 11 15 -9 4.05 2.73
 9 -15 -9 -2.55 3.22
 -9 -15 9 1.82 1.89
 9 15 -9 1.82 -1.89
 7 -15 -9 1.74 0.59
 -7 -15 9 -0.43 3.01
 -7 15 9 1.74 -0.59
 7 15 -9 -0.43 -3.01
 -5 -15 9 -1.54 0.33
 5 -15 -9 1.04 3.20
 5 15 -9 -1.54 -0.33
 -5 15 9 1.04 -3.20
 3 -15 -9 1.82 2.84
 -3 -15 9 -2.75 -0.25
 3 15 -9 -2.75 0.25
 -3 15 9 1.82 -2.84
 -1 -15 9 0.34 -0.09
 1 -15 -9 -0.02 -0.88
 1 15 -9 0.34 0.09
 -1 15 9 -0.02 0.88
 -1 -15 -9 -2.25 -5.13
 1 -15 9 1.93 -1.30
 -1 15 -9 1.93 1.30
 1 15 9 -2.25 5.13
 3 -15 9 1.60 3.45
 -3 -15 -9 -1.72 -0.01
 -3 15 -9 1.60 -3.45
 3 15 9 -1.72 0.01
 5 -15 9 -1.67 -1.38
 -5 -15 -9 1.27 4.13
 5 15 9 1.27 -4.13
 -5 15 -9 -1.67 1.38
 14 -16 -9 -2.26 3.22
 -12 -16 9 -0.86 4.78
 12 -16 -9 1.85 4.36
 12 16 -9 -0.86 -4.78
 -10 -16 9 1.98 0.95
 10 -16 -9 -1.90 0.69
 10 16 -9 1.98 -0.95
 -8 -16 9 2.52 -3.13
 8 -16 -9 -2.87 0.71
 8 16 -9 2.52 3.13
 -6 -16 9 2.96 -3.51
 6 -16 -9 -3.98 0.34
 -6 16 9 -3.98 -0.34
 6 16 -9 2.96 3.51
 -4 -16 9 5.94 -5.42
 4 -16 -9 -4.89 -5.42
 4 16 -9 5.94 5.42
 -4 16 9 -4.89 5.42
 -2 -16 9 2.35 1.09
 2 -16 -9 -1.54 -2.91
 -2 16 9 -1.54 2.91
 2 16 -9 2.35 -1.09
 0 -16 9 1.62 1.56
 0 -16 -9 -0.89 1.79
 0 16 -9 1.62 -1.56
 0 16 9 -0.89 -1.79
 2 -16 9 1.61 0.67
 -2 -16 -9 -1.12 2.94
 -2 16 -9 1.61 -0.67
 2 16 9 -1.12 -2.94
 34 0 -10 -5.50 -0.46
 32 0 -10 1.68 0.86
 30 0 -10 7.16 4.46
 28 0 -10 9.04 5.26
 26 0 -10 5.35 -3.25
 24 0 -10 -7.04 -1.95
 22 0 -10 -12.96 -1.92
 20 0 -10 -11.57 2.63
 20 0 -10 -11.57 2.63
 18 0 -10 6.19 -2.59
 18 0 -10 6.19 -2.59
 16 0 -10 4.07 -2.43
 16 0 -10 4.07 -2.43
 14 0 -10 -12.36 1.57
 14 0 -10 -12.36 1.57
 12 0 -10 -32.81 -2.72
 12 0 -10 -32.81 -2.72
 10 0 -10 -26.70 3.33
 8 0 -10 11.64 -4.48
 8 0 -10 11.64 -4.48
 6 0 -10 -50.84 -5.63
 4 0 -10 6.53 -5.41
 2 0 -10 -0.68 -9.38
 -2 0 10 -0.68 9.38
 0 0 -10 13.09 0.89
 -2 0 -10 23.39 2.02
 -4 0 -10 13.61 -0.09
 -6 0 -10 -3.38 9.84
 -8 0 -10 -7.88 2.11
 -10 0 -10 -1.25 3.70
 -12 0 -10 6.90 5.51
 -14 0 -10 5.02 9.07
 -16 0 -10 3.77 1.75
 -18 0 -10 -0.48 10.19
 -20 0 -10 -6.26 3.19
 33 -1 -10 2.27 -0.07
 33 1 -10 2.15 1.10
 31 -1 -10 -2.79 -3.59
 31 1 -10 -3.91 -1.20
 29 -1 -10 -5.90 -6.59
 29 1 -10 -6.85 -2.55
 27 -1 -10 -2.01 -4.15
 27 1 -10 -1.78 -1.66
 25 -1 -10 1.47 1.22
 25 1 -10 2.02 0.82
 23 -1 -10 6.41 -1.03
 23 1 -10 7.22 2.64
 23 1 -10 7.22 2.64
 21 1 -10 6.53 -1.10
 21 1 -10 6.53 -1.10
 17 -1 -10 -14.01 4.35
 17 -1 -10 -14.01 4.35
 17 1 -10 -13.53 3.17
 17 1 -10 -13.53 3.17
 15 -1 -10 -5.09 0.52
 15 -1 -10 -5.09 0.52
 15 1 -10 -4.77 1.62
 15 1 -10 -4.77 1.62
 13 -1 -10 5.26 2.70
 13 -1 -10 5.26 2.70
 13 1 -10 5.21 4.34
 13 1 -10 5.21 4.34
 11 -1 -10 2.13 1.05
 11 -1 -10 2.13 1.05
 11 1 -10 1.80 3.76
 11 1 -10 1.80 3.76
 9 -1 -10 -23.77 -1.36
 9 -1 -10 -23.77 -1.36
 9 -1 -10 -23.77 -1.36
 9 1 -10 -23.63 -0.74
 9 1 -10 -23.63 -0.74
 7 -1 -10 -2.98 -0.74
 7 -1 -10 -2.98 -0.74
 7 1 -10 -3.19 -2.85
 7 1 -10 -3.19 -2.85
 5 -1 -10 15.95 -2.28
 5 -1 -10 15.95 -2.28
 5 1 -10 15.68 -4.86
 3 -1 -10 5.05 0.66
 -3 -1 10 4.47 1.00
 3 -1 -10 5.05 0.66
 3 1 -10 4.47 -1.00
 1 -1 -10 10.35 1.43
 1 -1 -10 10.35 1.43
 -1 1 10 10.35 -1.43
 1 1 -10 10.52 -0.52
 -1 -1 -10 -4.92 1.76
 -1 1 -10 -4.65 -0.70
 -3 -1 -10 -14.14 3.22
 -3 1 -10 -13.21 4.79
 -5 -1 -10 -8.61 -2.62
 -5 1 -10 -8.27 -1.70
 -7 -1 -10 2.23 -3.28
 -7 1 -10 2.61 -0.86
 -9 -1 -10 6.36 -1.49
 -9 1 -10 6.01 -0.26
 -11 -1 -10 0.90 -1.60
 -11 1 -10 0.98 -1.84
 -13 -1 -10 -4.76 -4.38
 -13 1 -10 -4.69 -1.99
 -15 -1 -10 -2.86 -2.14
 -15 1 -10 -2.58 -3.72
 -17 -1 -10 -0.43 -6.53
 -17 1 -10 0.01 -5.48
 -19 -1 -10 2.63 -4.95
 -19 1 -10 2.14 -6.55
 -21 -1 -10 2.80 0.01
 -21 1 -10 2.70 -3.20
 34 -2 -10 1.36 1.65
 34 2 -10 1.22 -2.67
 32 -2 -10 -4.17 1.00
 32 2 -10 -4.24 -2.25
 30 -2 -10 0.29 3.46
 30 2 -10 0.81 -0.90
 28 -2 -10 -3.16 7.20
 28 2 -10 -2.99 -2.73
 26 -2 -10 -4.98 2.22
 26 2 -10 -5.43 6.12
 24 -2 -10 -0.44 2.48
 24 2 -10 -1.12 -1.29
 24 2 -10 -1.12 -1.29
 22 -2 -10 -3.71 5.29
 22 -2 -10 -3.71 5.29
 22 2 -10 -4.27 1.72
 22 2 -10 -4.27 1.72
 20 2 -10 -0.03 1.15
 20 2 -10 -0.03 1.15
 18 -2 -10 -1.05 -1.17
 18 2 -10 -1.34 -0.83
 16 -2 -10 0.00 0.93
 16 -2 -10 0.00 0.93
 16 2 -10 -0.21 -0.27
 16 2 -10 -0.21 -0.27
 14 -2 -10 -7.49 -4.07
 14 -2 -10 -7.49 -4.07
 14 2 -10 -7.50 -5.59
 14 2 -10 -7.50 -5.59
 12 -2 -10 0.39 -4.77
 12 2 -10 0.87 -4.10
 12 2 -10 0.87 -4.10
 10 -2 -10 25.49 -3.14
 10 2 -10 26.18 -4.22
 10 2 -10 26.18 -4.22
 8 -2 -10 -5.65 0.43
 8 2 -10 -5.91 5.74
 8 2 -10 -5.91 5.74
 6 -2 -10 17.56 3.86
 -6 -2 10 18.13 -3.17
 6 -2 -10 17.56 3.86
 6 2 -10 18.13 3.17
 4 -2 -10 -15.22 0.52
 4 -2 -10 -15.22 0.52
 -4 -2 10 -14.97 0.38
 4 2 -10 -14.97 -0.38
 4 2 -10 -14.97 -0.38
 -4 2 10 -15.22 -0.52
 -2 -2 10 2.81 0.29
 2 -2 -10 2.38 1.31
 2 -2 -10 2.38 1.31
 -2 2 10 2.38 -1.31
 2 2 -10 2.81 -0.29
 0 -2 -10 -11.28 -1.63
 0 -2 -10 -11.28 -1.63
 0 2 10 -11.28 1.63
 0 2 -10 -11.51 -5.31
 -2 -2 -10 -5.30 -4.23
 -2 -2 -10 -5.30 -4.23
 -2 2 -10 -5.90 -5.11
 2 2 10 -5.30 4.23
 2 2 10 -5.30 4.23
 -4 -2 -10 2.13 1.36
 4 2 10 2.13 -1.36
 -4 2 -10 2.17 -2.47
 -6 -2 -10 4.45 -0.33
 -6 -2 -10 4.45 -0.33
 6 2 10 4.45 0.33
 -6 2 -10 4.67 -2.91
 -8 -2 -10 -1.74 0.68
 -8 2 -10 -1.54 -1.81
 8 2 10 -1.74 -0.68
 -10 -2 -10 -7.85 0.11
 -10 2 -10 -7.37 0.16
 10 2 10 -7.85 -0.11
 -12 -2 -10 -4.67 -0.59
 -12 2 -10 -4.59 1.18
 -14 -2 -10 3.00 -2.66
 -14 2 -10 2.90 -3.26
 -16 -2 -10 0.54 6.29
 -16 2 -10 0.19 3.79
 -18 -2 -10 0.38 0.20
 -18 2 -10 0.85 1.86
 -20 -2 -10 3.75 1.71
 -20 2 -10 4.07 2.83
 33 -3 -10 4.58 -4.83
 33 3 -10 5.29 4.44
 31 -3 -10 4.58 -1.74
 31 3 -10 5.24 2.99
 29 -3 -10 4.48 -4.68
 29 3 -10 5.35 4.33
 27 -3 -10 2.97 -2.02
 27 3 -10 2.90 -2.43
 25 -3 -10 -1.90 0.87
 25 -3 -10 -1.90 0.87
 25 3 -10 -1.65 -5.16
 25 3 -10 -1.65 -5.16
 23 -3 -10 -6.00 0.81
 23 -3 -10 -6.00 0.81
 23 3 -10 -5.28 -3.66
 23 3 -10 -5.28 -3.66
 21 -3 -10 -3.54 -0.75
 21 -3 -10 -3.54 -0.75
 21 3 -10 -2.93 -0.09
 21 3 -10 -2.93 -0.09
 19 -3 -10 7.34 1.12
 19 3 -10 7.37 -0.11
 19 3 -10 7.37 -0.11
 17 -3 -10 9.53 1.45
 17 -3 -10 9.53 1.45
 17 3 -10 10.00 1.93
 17 3 -10 10.00 1.93
 15 -3 -10 6.62 2.82
 15 -3 -10 6.62 2.82
 15 3 -10 7.66 4.92
 15 3 -10 7.66 4.92
 13 -3 -10 8.94 7.45
 13 -3 -10 8.94 7.45
 13 3 -10 9.06 8.85
 13 3 -10 9.06 8.85
 11 -3 -10 -10.64 5.07
 11 -3 -10 -10.64 5.07
 11 3 -10 -10.83 5.29
 -9 -3 10 21.06 3.24
 9 -3 -10 20.59 -2.51
 9 -3 -10 20.59 -2.51
 9 3 -10 21.06 -3.24
 9 3 -10 21.06 -3.24
 -9 3 10 20.59 2.51
 7 -3 -10 18.77 -2.82
 7 -3 -10 18.77 -2.82
 7 3 -10 18.59 -2.80
 -7 3 10 18.77 2.82
 7 3 -10 18.59 -2.80
 -5 -3 10 -5.79 6.89
 5 -3 -10 -4.87 -5.81
 5 -3 -10 -4.87 -5.81
 5 3 -10 -5.79 -6.89
 5 3 -10 -5.79 -6.89
 -5 3 10 -4.87 5.81
 3 -3 -10 -8.99 -0.50
 -3 -3 10 -10.16 4.61
 3 3 -10 -10.16 -4.61
 3 3 -10 -10.16 -4.61
 -3 3 10 -8.99 0.50
 1 -3 -10 -21.14 -2.38
 -1 -3 10 -22.59 1.38
 1 -3 -10 -21.14 -2.38
 1 3 -10 -22.59 -1.38
 -1 3 10 -21.14 2.38
 1 -3 10 6.18 -1.04
 -1 -3 -10 6.59 -3.35
 -1 -3 -10 6.59 -3.35
 -1 3 -10 6.18 1.04
 1 3 10 6.59 3.35
 -3 -3 -10 15.12 0.80
 3 -3 10 14.03 0.03
 -3 -3 -10 15.12 0.80
 -3 3 -10 14.03 -0.03
 -3 3 -10 14.03 -0.03
 3 3 10 15.12 -0.80
 -5 -3 -10 5.94 -1.22
 -5 -3 -10 5.94 -1.22
 5 3 10 5.94 1.22
 -5 3 -10 5.34 0.97
 -7 -3 -10 -1.54 3.55
 -7 -3 -10 -1.54 3.55
 -7 3 -10 -1.55 3.52
 7 3 10 -1.54 -3.55
 -9 -3 -10 -0.21 0.81
 9 3 10 -0.21 -0.81
 -9 3 -10 -0.16 -0.44
 -11 -3 -10 6.73 -1.51
 11 3 10 6.73 1.51
 -11 3 -10 6.37 -4.26
 -13 -3 -10 2.53 2.51
 13 3 10 2.53 -2.51
 -13 3 -10 3.30 -4.48
 -15 -3 -10 -0.57 -3.72
 15 3 10 -0.57 3.72
 -15 3 -10 -0.09 3.16
 -17 -3 -10 -2.30 -3.26
 -17 3 -10 -1.19 -0.35
 -19 -3 -10 -3.63 -2.50
 -19 3 -10 -4.88 1.07
 -21 -3 -10 -3.15 -1.24
 -21 3 -10 -3.16 0.44
 34 -4 -10 -1.53 1.45
 -34 -4 10 -2.46 0.53
 34 4 -10 -2.46 -0.53
 -32 -4 10 -4.30 4.00
 32 -4 -10 -3.30 4.40
 32 4 -10 -4.30 -4.00
 30 -4 -10 -0.15 1.40
 -30 -4 10 -2.92 0.25
 30 4 -10 -2.92 -0.25
 28 -4 -10 -3.48 3.12
 28 -4 -10 -3.48 3.12
 28 4 -10 -4.29 -0.83
 26 -4 -10 -1.09 4.35
 26 -4 -10 -1.09 4.35
 26 4 -10 -0.78 1.83
 26 4 -10 -0.78 1.83
 24 -4 -10 3.34 -1.14
 24 -4 -10 3.34 -1.14
 24 4 -10 3.97 2.64
 24 4 -10 3.97 2.64
 22 -4 -10 11.04 -1.01
 22 -4 -10 11.04 -1.01
 22 4 -10 10.99 -2.46
 22 4 -10 10.99 -2.46
 20 -4 -10 4.57 1.30
 20 -4 -10 4.57 1.30
 20 4 -10 5.26 0.48
 20 4 -10 5.26 0.48
 18 -4 -10 -2.83 -2.22
 18 -4 -10 -2.83 -2.22
 18 4 -10 -2.39 1.12
 18 4 -10 -2.39 1.12
 16 -4 -10 -4.13 -4.43
 16 -4 -10 -4.13 -4.43
 16 4 -10 -4.55 -1.14
 16 4 -10 -4.55 -1.14
 -14 -4 10 -2.79 5.80
 14 -4 -10 -2.75 -2.77
 14 -4 -10 -2.75 -2.77
 14 4 -10 -2.79 -5.80
 14 4 -10 -2.79 -5.80
 -12 -4 10 12.65 11.88
 12 -4 -10 12.59 -10.39
 12 -4 -10 12.59 -10.39
 12 4 -10 12.65 -11.88
 12 4 -10 12.65 -11.88
 10 -4 -10 -8.46 -3.98
 -10 -4 10 -8.65 -0.57
 10 -4 -10 -8.46 -3.98
 -10 4 10 -8.46 3.98
 10 4 -10 -8.65 0.57
 10 4 -10 -8.65 0.57
 8 -4 -10 -15.82 1.34
 -8 -4 10 -16.04 0.95
 8 -4 -10 -15.82 1.34
 8 4 -10 -16.04 -0.95
 -8 4 10 -15.82 -1.34
 8 4 -10 -16.04 -0.95
 6 -4 -10 -22.33 12.13
 6 -4 -10 -22.33 12.13
 -6 -4 10 -21.98 -13.65
 6 4 -10 -21.98 13.65
 6 4 -10 -21.98 13.65
 -6 4 10 -22.33 -12.13
 4 -4 -10 1.37 18.36
 -4 -4 10 1.18 -18.54
 4 -4 -10 1.37 18.36
 -4 4 10 1.37 -18.36
 4 4 -10 1.18 18.54
 4 4 -10 1.18 18.54
 2 -4 -10 5.60 10.25
 -2 -4 10 5.97 -6.52
 2 -4 -10 5.60 10.25
 -2 4 10 5.60 -10.25
 2 4 -10 5.97 6.52
 2 4 -10 5.97 6.52
 0 -4 10 13.94 -3.70
 0 -4 -10 13.74 10.94
 0 4 -10 13.94 3.70
 0 4 10 13.74 -10.94
 0 4 -10 13.94 3.70
 2 -4 10 -10.66 6.57
 -2 -4 -10 -10.76 -3.69
 -2 4 -10 -10.66 -6.57
 2 4 10 -10.76 3.69
 -4 -4 -10 -9.15 -3.21
 -4 -4 -10 -9.15 -3.21
 4 -4 10 -8.73 4.65
 -4 4 -10 -8.73 -4.65
 4 4 10 -9.15 3.21
 -6 -4 -10 0.73 -2.07
 -6 -4 -10 0.73 -2.07
 6 4 10 0.73 2.07
 -6 4 -10 0.49 -3.13
 -8 -4 -10 2.68 -1.93
 -8 4 -10 2.20 -4.10
 8 4 10 2.68 1.93
 -10 -4 -10 -1.61 2.44
 10 4 10 -1.61 -2.44
 -10 4 -10 -1.43 1.98
 -12 -4 -10 -1.99 1.69
 12 4 10 -1.99 -1.69
 -12 4 -10 -2.27 1.85
 -14 -4 -10 -4.07 -0.88
 14 4 10 -4.07 0.88
 -14 4 -10 -3.68 -4.95
 -16 -4 -10 0.90 2.58
 -16 4 -10 -0.50 -9.85
 16 4 10 0.90 -2.58
 -18 -4 -10 4.40 6.98
 18 4 10 4.40 -6.98
 -18 4 -10 4.42 -5.80
 -20 -4 -10 -0.54 4.36
 -20 4 -10 -0.44 -2.56
 -33 -5 10 -0.45 1.84
 33 -5 -10 -1.00 1.48
 33 5 -10 -0.45 -1.84
 31 -5 -10 -0.06 3.82
 -31 -5 10 2.09 4.74
 31 -5 -10 -0.06 3.82
 31 5 -10 2.09 -4.74
 29 -5 -10 -2.23 1.30
 -29 -5 10 0.20 7.28
 29 -5 -10 -2.23 1.30
 29 5 -10 0.20 -7.28
 27 -5 -10 3.14 -2.42
 27 -5 -10 3.14 -2.42
 -27 -5 10 3.60 4.09
 27 5 -10 3.60 -4.09
 27 5 -10 3.60 -4.09
 25 -5 -10 3.56 0.44
 25 -5 -10 3.56 0.44
 -25 -5 10 2.08 3.98
 25 5 -10 2.08 -3.98
 25 5 -10 2.08 -3.98
 23 -5 -10 -0.39 3.64
 -23 -5 10 -1.10 -1.72
 23 -5 -10 -0.39 3.64
 23 5 -10 -1.10 1.72
 23 5 -10 -1.10 1.72
 21 -5 -10 -1.30 -3.12
 21 -5 -10 -1.30 -3.12
 -21 -5 10 -2.09 0.47
 21 5 -10 -2.09 -0.47
 21 5 -10 -2.09 -0.47
 -19 -5 10 4.55 3.70
 19 -5 -10 4.02 -0.02
 19 -5 -10 4.02 -0.02
 19 5 -10 4.55 -3.70
 19 5 -10 4.55 -3.70
 17 -5 -10 11.95 -1.18
 17 -5 -10 11.95 -1.18
 17 5 -10 12.28 -0.89
 17 5 -10 12.28 -0.89
 15 -5 -10 14.81 -2.27
 15 -5 -10 14.81 -2.27
 -15 -5 10 14.96 2.53
 15 5 -10 14.96 -2.53
 15 5 -10 14.96 -2.53
 13 -5 -10 5.68 0.72
 13 -5 -10 5.68 0.72
 -13 -5 10 5.52 -7.30
 13 5 -10 5.52 7.30
 13 5 -10 5.52 7.30
 -13 5 10 5.68 -0.72
 11 -5 -10 9.43 4.11
 11 -5 -10 9.43 4.11
 -11 -5 10 10.38 -2.47
 11 5 -10 10.38 2.47
 11 5 -10 10.38 2.47
 -11 5 10 9.43 -4.11
 9 -5 -10 11.22 13.65
 -9 -5 10 11.17 -6.70
 9 -5 -10 11.22 13.65
 9 5 -10 11.17 6.70
 -9 5 10 11.22 -13.65
 9 5 -10 11.17 6.70
 7 -5 -10 15.53 3.93
 7 -5 -10 15.53 3.93
 -7 -5 10 14.89 1.98
 7 5 -10 14.89 -1.98
 -7 5 10 15.53 -3.93
 7 5 -10 14.89 -1.98
 5 -5 -10 13.56 -5.13
 5 -5 -10 13.56 -5.13
 -5 -5 10 13.03 13.13
 5 5 -10 13.03 -13.13
 5 5 -10 13.03 -13.13
 -5 5 10 13.56 5.13
 3 -5 -10 3.05 -5.74
 -3 -5 10 3.97 6.63
 3 -5 -10 3.05 -5.74
 3 5 -10 3.97 -6.63
 3 5 -10 3.97 -6.63
 -3 5 10 3.05 5.74
 1 -5 -10 -5.20 -8.22
 1 -5 -10 -5.20 -8.22
 1 5 -10 -5.41 -7.64
 -1 5 10 -5.20 8.22
 1 5 -10 -5.41 -7.64
 1 -5 10 -6.93 0.24
 -1 -5 -10 -7.08 0.99
 -1 -5 -10 -7.08 0.99
 -1 5 -10 -6.93 -0.24
 -1 5 -10 -6.93 -0.24
 1 5 10 -7.08 -0.99
 -3 -5 -10 0.79 3.08
 3 -5 10 1.80 -3.18
 -3 5 -10 1.80 3.18
 3 5 10 0.79 -3.08
 -5 -5 -10 2.65 -0.09
 5 -5 10 2.74 2.81
 -5 5 -10 2.74 -2.81
 5 5 10 2.65 0.09
 -7 -5 -10 -0.68 -1.59
 -7 -5 -10 -0.68 -1.59
 -7 5 -10 -0.13 -2.58
 7 5 10 -0.68 1.59
 -9 -5 -10 2.18 1.08
 9 5 10 2.18 -1.08
 -9 5 -10 2.80 -0.48
 -11 -5 -10 1.51 -1.50
 -11 5 -10 2.12 -2.37
 11 5 10 1.51 1.50
 -13 -5 -10 1.46 5.61
 -13 5 -10 0.67 6.99
 13 5 10 1.46 -5.61
 -15 -5 -10 4.56 5.77
 15 5 10 4.56 -5.77
 -15 5 -10 3.65 7.06
 -17 -5 -10 -2.61 1.97
 17 5 10 -2.61 -1.97
 -19 -5 -10 -0.42 -2.96
 19 5 10 -0.42 2.96
 -32 -6 10 -0.18 -5.14
 32 -6 -10 0.85 -2.61
 32 -6 -10 0.85 -2.61
 32 6 -10 -0.18 5.14
 -30 -6 10 -3.89 -5.02
 30 -6 -10 -2.28 -1.23
 30 -6 -10 -2.28 -1.23
 30 6 -10 -3.89 5.02
 28 -6 -10 1.47 5.77
 -28 -6 10 -0.19 -6.10
 28 -6 -10 1.47 5.77
 28 6 -10 -0.19 6.10
 28 6 -10 -0.19 6.10
 -26 -6 10 -0.42 -3.94
 26 -6 -10 -1.03 -1.22
 26 -6 -10 -1.03 -1.22
 26 6 -10 -0.42 3.94
 26 6 -10 -0.42 3.94
 24 -6 -10 -2.49 -4.38
 24 -6 -10 -2.49 -4.38
 -24 -6 10 -1.07 -1.36
 24 6 -10 -1.07 1.36
 24 6 -10 -1.07 1.36
 -22 -6 10 -2.06 -0.15
 22 -6 -10 -2.68 1.41
 22 -6 -10 -2.68 1.41
 22 6 -10 -2.06 0.15
 22 6 -10 -2.06 0.15
 20 -6 -10 -1.21 1.88
 20 -6 -10 -1.21 1.88
 -20 -6 10 -1.66 -0.98
 20 6 -10 -1.66 0.98
 20 6 -10 -1.66 0.98
 18 -6 -10 -1.44 2.97
 18 -6 -10 -1.44 2.97
 -18 -6 10 -2.20 2.39
 18 6 -10 -2.20 -2.39
 18 6 -10 -2.20 -2.39
 16 -6 -10 -1.63 4.68
 16 -6 -10 -1.63 4.68
 -16 -6 10 -1.34 -0.24
 16 6 -10 -1.34 0.24
 16 6 -10 -1.34 0.24
 -14 -6 10 3.01 -0.29
 14 -6 -10 2.22 2.47
 14 -6 -10 2.22 2.47
 -14 6 10 2.22 -2.47
 14 6 -10 3.01 0.29
 14 6 -10 3.01 0.29
 12 -6 -10 -3.57 4.86
 12 -6 -10 -3.57 4.86
 -12 -6 10 -3.81 -1.98
 -12 6 10 -3.57 -4.86
 12 6 -10 -3.81 1.98
 12 6 -10 -3.81 1.98
 10 -6 -10 -0.91 -0.18
 10 -6 -10 -0.91 -0.18
 -10 -6 10 -2.01 1.72
 10 6 -10 -2.01 -1.72
 -10 6 10 -0.91 0.18
 10 6 -10 -2.01 -1.72
 8 -6 -10 -9.40 -6.09
 -8 -6 10 -9.00 -1.33
 8 -6 -10 -9.40 -6.09
 8 6 -10 -9.00 1.33
 8 6 -10 -9.00 1.33
 -8 6 10 -9.40 6.09
 -6 -6 10 -3.42 -4.37
 6 -6 -10 -5.58 0.61
 6 -6 -10 -5.58 0.61
 6 6 -10 -3.42 4.37
 -6 6 10 -5.58 -0.61
 6 6 -10 -3.42 4.37
 4 -6 -10 -8.34 0.37
 4 -6 -10 -8.34 0.37
 -4 -6 10 -8.04 -3.53
 -4 6 10 -8.34 -0.37
 4 6 -10 -8.04 3.53
 4 6 -10 -8.04 3.53
 2 -6 -10 0.64 2.83
 -2 -6 10 0.27 -4.95
 2 -6 -10 0.64 2.83
 2 6 -10 0.27 4.95
 2 6 -10 0.27 4.95
 -2 6 10 0.64 -2.83
 0 -6 10 2.90 -4.51
 0 -6 -10 2.44 3.30
 0 -6 -10 2.44 3.30
 0 6 -10 2.90 4.51
 0 6 10 2.44 -3.30
 0 6 -10 2.90 4.51
 2 -6 10 4.40 -0.55
 -2 -6 -10 5.00 1.71
 -2 -6 -10 5.00 1.71
 -2 6 -10 4.40 0.55
 2 6 10 5.00 -1.71
 -4 -6 -10 -2.34 3.33
 4 -6 10 -2.79 -1.48
 -4 -6 -10 -2.34 3.33
 4 6 10 -2.34 -3.33
 -4 6 -10 -2.79 1.48
 -4 6 -10 -2.79 1.48
 -6 -6 -10 -6.97 4.56
 -6 -6 -10 -6.97 4.56
 -6 6 -10 -7.13 2.71
 -6 6 -10 -7.13 2.71
 6 6 10 -6.97 -4.56
 -8 -6 -10 -2.22 1.53
 -8 -6 -10 -2.22 1.53
 8 6 10 -2.22 -1.53
 -8 6 -10 -2.34 -0.69
 -8 6 -10 -2.34 -0.69
 -10 -6 -10 -0.71 1.79
 10 6 10 -0.71 -1.79
 -10 6 -10 -2.21 0.74
 -12 -6 -10 1.74 -3.89
 12 6 10 1.74 3.89
 -14 -6 -10 -0.87 -2.85
 14 6 10 -0.87 2.85
 -16 -6 -10 -2.04 -5.96
 16 6 10 -2.04 5.96
 -18 -6 -10 0.94 -2.55
 18 6 10 0.94 2.55
 20 6 10 -0.34 -1.27
 31 -7 -10 1.16 -0.01
 -31 -7 10 0.94 1.96
 31 -7 -10 1.16 -0.01
 31 7 -10 0.94 -1.96
 29 -7 -10 1.59 -4.81
 -29 -7 10 1.11 -0.70
 29 -7 -10 1.59 -4.81
 29 7 -10 1.11 0.70
 29 7 -10 1.11 0.70
 -27 -7 10 0.49 0.40
 27 -7 -10 1.17 -6.56
 27 -7 -10 1.17 -6.56
 27 7 -10 0.49 -0.40
 27 7 -10 0.49 -0.40
 25 -7 -10 3.01 2.44
 25 -7 -10 3.01 2.44
 -25 -7 10 2.37 2.09
 25 7 -10 2.37 -2.09
 25 7 -10 2.37 -2.09
 23 -7 -10 5.28 0.26
 23 -7 -10 5.28 0.26
 -23 -7 10 5.90 0.98
 23 7 -10 5.90 -0.98
 23 7 -10 5.90 -0.98
 21 -7 -10 3.34 -0.28
 -21 -7 10 4.12 2.65
 21 -7 -10 3.34 -0.28
 21 7 -10 4.12 -2.65
 21 7 -10 4.12 -2.65
 19 -7 -10 -3.09 0.35
 -19 -7 10 -1.95 -0.72
 19 -7 -10 -3.09 0.35
 19 7 -10 -1.95 0.72
 19 7 -10 -1.95 0.72
 17 -7 -10 -8.17 -2.05
 17 -7 -10 -8.17 -2.05
 -17 -7 10 -8.10 0.58
 17 7 -10 -8.10 -0.58
 17 7 -10 -8.10 -0.58
 -15 -7 10 -7.94 2.03
 15 -7 -10 -8.01 -3.19
 15 -7 -10 -8.01 -3.19
 15 7 -10 -7.94 -2.03
 15 7 -10 -7.94 -2.03
 13 -7 -10 -2.74 -0.56
 -13 -7 10 -3.34 4.24
 13 -7 -10 -2.74 -0.56
 13 7 -10 -3.34 -4.24
 -13 7 10 -2.74 0.56
 13 7 -10 -3.34 -4.24
 -11 -7 10 -0.14 1.31
 11 -7 -10 -0.46 2.80
 11 -7 -10 -0.46 2.80
 -11 7 10 -0.46 -2.80
 11 7 -10 -0.14 -1.31
 11 7 -10 -0.14 -1.31
 9 -7 -10 0.44 -1.22
 9 -7 -10 0.44 -1.22
 -9 -7 10 0.71 1.33
 9 7 -10 0.71 -1.33
 -9 7 10 0.44 1.22
 9 7 -10 0.71 -1.33
 -7 -7 10 -1.65 3.92
 7 -7 -10 -0.88 2.07
 7 -7 -10 -0.88 2.07
 7 7 -10 -1.65 -3.92
 7 7 -10 -1.65 -3.92
 -7 7 10 -0.88 -2.07
 5 -7 -10 4.28 -1.72
 5 -7 -10 4.28 -1.72
 -5 -7 10 3.68 0.91
 5 7 -10 3.68 -0.91
 5 7 -10 3.68 -0.91
 -5 7 10 4.28 1.72
 -3 -7 10 7.91 2.04
 3 -7 -10 7.44 -3.55
 3 -7 -10 7.44 -3.55
 3 7 -10 7.91 -2.04
 -3 7 10 7.44 3.55
 3 7 -10 7.91 -2.04
 -1 -7 10 3.49 -3.32
 1 -7 -10 3.10 3.46
 1 -7 -10 3.10 3.46
 1 7 -10 3.49 3.32
 -1 7 10 3.10 -3.46
 1 7 -10 3.49 3.32
 -1 -7 -10 -2.32 3.32
 1 -7 10 -2.73 1.76
 -1 -7 -10 -2.32 3.32
 1 7 10 -2.32 -3.32
 -3 -7 -10 -4.52 6.50
 3 -7 10 -5.52 1.41
 -3 -7 -10 -4.52 6.50
 3 7 10 -4.52 -6.50
 -3 7 -10 -5.52 -1.41
 -5 -7 -10 1.36 0.08
 5 -7 10 1.26 3.05
 -5 -7 -10 1.36 0.08
 5 7 10 1.36 -0.08
 -5 7 -10 1.26 -3.05
 -7 -7 -10 5.37 -1.96
 -7 -7 -10 5.37 -1.96
 7 7 10 5.37 1.96
 -7 7 -10 5.33 0.48
 -9 -7 -10 3.20 -1.91
 9 7 10 3.20 1.91
 -9 7 -10 4.27 -2.31
 -11 -7 -10 -1.46 3.97
 -11 7 -10 -0.53 1.79
 11 7 10 -1.46 -3.97
 -13 -7 -10 -0.46 3.82
 -13 7 -10 -0.27 -1.18
 13 7 10 -0.46 -3.82
 -15 -7 -10 -0.80 2.71
 -15 7 -10 0.54 -4.76
 15 7 10 -0.80 -2.71
 -17 -7 -10 -0.84 8.08
 -17 7 -10 0.35 -3.60
 17 7 10 -0.84 -8.08
 -19 -7 -10 -0.13 2.57
 19 7 10 -0.13 -2.57
 -19 7 -10 -0.79 -0.95
 30 -8 -10 -0.10 0.86
 -30 -8 10 -0.03 0.25
 30 -8 -10 -0.10 0.86
 30 8 -10 -0.03 -0.25
 30 8 -10 -0.03 -0.25
 28 -8 -10 -0.43 4.33
 -28 -8 10 0.94 5.84
 28 -8 -10 -0.43 4.33
 28 8 -10 0.94 -5.84
 28 8 -10 0.94 -5.84
 26 -8 -10 -4.96 3.02
 -26 -8 10 -3.78 3.06
 26 -8 -10 -4.96 3.02
 26 8 -10 -3.78 -3.06
 26 8 -10 -3.78 -3.06
 24 -8 -10 -2.53 -1.22
 24 -8 -10 -2.53 -1.22
 -24 -8 10 -3.39 0.34
 24 8 -10 -3.39 -0.34
 24 8 -10 -3.39 -0.34
 22 -8 -10 -2.68 -1.30
 -22 -8 10 -3.36 -1.83
 22 -8 -10 -2.68 -1.30
 22 8 -10 -3.36 1.83
 22 8 -10 -3.36 1.83
 20 -8 -10 -0.65 -0.73
 -20 -8 10 -0.45 -0.66
 20 -8 -10 -0.65 -0.73
 20 8 -10 -0.45 0.66
 20 8 -10 -0.45 0.66
 18 -8 -10 5.00 -1.14
 18 -8 -10 5.00 -1.14
 -18 -8 10 4.96 -0.71
 18 8 -10 4.96 0.71
 18 8 -10 4.96 0.71
 -16 -8 10 2.89 -0.62
 16 -8 -10 2.38 6.98
 16 -8 -10 2.38 6.98
 16 8 -10 2.89 0.62
 16 8 -10 2.89 0.62
 14 -8 -10 -4.72 6.26
 14 -8 -10 -4.72 6.26
 -14 -8 10 -5.09 -4.28
 14 8 -10 -5.09 4.28
 14 8 -10 -5.09 4.28
 12 -8 -10 -7.52 -2.97
 -12 -8 10 -6.82 -3.27
 12 -8 -10 -7.52 -2.97
 12 8 -10 -6.82 3.27
 12 8 -10 -6.82 3.27
 -12 8 10 -7.52 2.97
 -10 -8 10 -3.98 -2.82
 10 -8 -10 -4.37 -1.63
 10 -8 -10 -4.37 -1.63
 -10 8 10 -4.37 1.63
 10 8 -10 -3.98 2.82
 10 8 -10 -3.98 2.82
 -8 -8 10 6.60 4.25
 8 -8 -10 6.38 -0.05
 8 -8 -10 6.38 -0.05
 8 8 -10 6.60 -4.25
 8 8 -10 6.60 -4.25
 -8 8 10 6.38 0.05
 6 -8 -10 3.52 -4.69
 6 -8 -10 3.52 -4.69
 -6 -8 10 3.38 0.54
 -6 8 10 3.52 4.69
 6 8 -10 3.38 -0.54
 4 -8 -10 0.35 -0.27
 4 -8 -10 0.35 -0.27
 -4 -8 10 0.79 -2.08
 4 8 -10 0.79 2.08
 -4 8 10 0.35 0.27
 2 -8 -10 -6.70 -1.66
 -2 -8 10 -6.56 5.34
 2 -8 -10 -6.70 -1.66
 2 8 -10 -6.56 -5.34
 -2 8 10 -6.70 1.66
 0 -8 -10 -2.15 -1.07
 0 -8 10 -2.31 1.23
 0 -8 -10 -2.15 -1.07
 0 8 10 -2.15 1.07
 2 -8 10 4.65 -5.50
 -2 -8 -10 4.55 -6.22
 -2 -8 -10 4.55 -6.22
 2 8 10 4.55 6.22
 -2 8 -10 4.65 5.50
 -4 -8 -10 5.79 -1.92
 -4 -8 -10 5.79 -1.92
 4 -8 10 6.01 -4.88
 -4 8 -10 6.01 4.88
 4 8 10 5.79 1.92
 -6 -8 -10 0.92 3.68
 -6 -8 -10 0.92 3.68
 6 8 10 0.92 -3.68
 -6 8 -10 -0.22 2.71
 -8 -8 -10 -3.46 5.55
 -8 -8 -10 -3.46 5.55
 8 8 10 -3.46 -5.55
 -8 8 -10 -5.56 0.85
 -10 -8 -10 -1.00 -0.13
 10 8 10 -1.00 0.13
 -10 8 -10 -1.90 -2.72
 -12 -8 -10 -0.94 1.83
 -12 8 -10 -1.73 -3.83
 12 8 10 -0.94 -1.83
 -14 -8 -10 -0.25 1.11
 14 8 10 -0.25 -1.11
 -14 8 -10 -0.75 2.58
 -16 -8 -10 4.07 -3.35
 -16 8 -10 2.83 1.84
 16 8 10 4.07 3.35
 -18 -8 -10 1.50 -4.95
 18 8 10 1.50 4.95
 -18 8 -10 1.52 0.29
 29 -9 -10 -1.17 -2.25
 -29 -9 10 -1.25 -1.57
 29 -9 -10 -1.17 -2.25
 29 9 -10 -1.25 1.57
 29 9 -10 -1.25 1.57
 -27 -9 10 -0.15 -4.63
 27 -9 -10 1.46 -2.48
 27 -9 -10 1.46 -2.48
 27 9 -10 -0.15 4.63
 27 9 -10 -0.15 4.63
 -25 -9 10 1.12 -3.70
 25 -9 -10 1.22 -3.51
 25 -9 -10 1.22 -3.51
 25 9 -10 1.12 3.70
 25 9 -10 1.12 3.70
 -23 -9 10 -3.94 1.56
 23 -9 -10 -3.82 -1.33
 23 -9 -10 -3.82 -1.33
 23 9 -10 -3.94 -1.56
 23 9 -10 -3.94 -1.56
 21 -9 -10 -1.47 -3.39
 -21 -9 10 -1.15 -3.35
 21 -9 -10 -1.47 -3.39
 21 9 -10 -1.15 3.35
 21 9 -10 -1.15 3.35
 -19 -9 10 -5.06 -2.54
 19 -9 -10 -4.58 -1.89
 19 -9 -10 -4.58 -1.89
 19 9 -10 -5.06 2.54
 19 9 -10 -5.06 2.54
 17 -9 -10 -1.46 -2.54
 17 -9 -10 -1.46 -2.54
 -17 -9 10 -1.24 -5.61
 17 9 -10 -1.24 5.61
 17 9 -10 -1.24 5.61
 15 -9 -10 2.20 -6.65
 -15 -9 10 1.99 -2.12
 15 -9 -10 2.20 -6.65
 15 9 -10 1.99 2.12
 15 9 -10 1.99 2.12
 13 -9 -10 5.27 0.28
 -13 -9 10 5.74 1.68
 13 -9 -10 5.27 0.28
 13 9 -10 5.74 -1.68
 13 9 -10 5.74 -1.68
 -13 9 10 5.27 -0.28
 11 -9 -10 5.14 -0.15
 -11 -9 10 4.61 4.77
 11 -9 -10 5.14 -0.15
 -11 9 10 5.14 0.15
 11 9 -10 4.61 -4.77
 9 -9 -10 -2.15 -2.10
 9 -9 -10 -2.15 -2.10
 -9 -9 10 -2.54 -0.36
 -9 9 10 -2.15 2.10
 9 9 -10 -2.54 0.36
 -7 -9 10 -3.31 -7.97
 7 -9 -10 -2.76 0.30
 7 -9 -10 -2.76 0.30
 -7 9 10 -2.76 -0.30
 7 9 -10 -3.31 7.97
 5 -9 -10 -4.12 -2.67
 5 -9 -10 -4.12 -2.67
 -5 -9 10 -5.03 1.52
 -5 9 10 -4.12 2.67
 5 9 -10 -5.03 -1.52
 -3 -9 10 -1.40 -1.02
 3 -9 -10 -0.40 4.36
 3 -9 -10 -0.40 4.36
 3 9 -10 -1.40 1.02
 -3 9 10 -0.40 -4.36
 1 -9 -10 4.25 -6.81
 1 -9 -10 4.25 -6.81
 -1 -9 10 3.65 -4.81
 1 9 -10 3.65 4.81
 -1 9 10 4.25 6.81
 -1 -9 -10 -0.75 -0.09
 -1 -9 -10 -0.75 -0.09
 1 -9 10 -0.06 2.60
 -1 9 -10 -0.06 -2.60
 1 9 10 -0.75 0.09
 -3 -9 -10 -3.92 2.09
 -3 -9 -10 -3.92 2.09
 3 -9 10 -3.51 3.43
 -3 9 -10 -3.51 -3.43
 3 9 10 -3.92 -2.09
 -5 -9 -10 -6.45 -0.65
 5 -9 10 -6.21 2.70
 -5 -9 -10 -6.45 -0.65
 -5 9 -10 -6.21 -2.70
 5 9 10 -6.45 0.65
 -7 -9 -10 -4.45 -2.74
 -7 -9 -10 -4.45 -2.74
 7 9 10 -4.45 2.74
 -7 9 -10 -2.19 -3.73
 -9 -9 -10 -2.72 -1.61
 9 9 10 -2.72 1.61
 -9 9 -10 -2.54 2.13
 -11 -9 -10 -1.69 -2.14
 11 9 10 -1.69 2.14
 -11 9 -10 -1.39 2.67
 -13 -9 -10 1.48 -5.41
 13 9 10 1.48 5.41
 -13 9 -10 1.51 1.15
 -15 -9 -10 0.29 1.67
 -15 9 -10 1.14 1.55
 15 9 10 0.29 -1.67
 -17 -9 -10 -2.16 2.06
 -17 9 -10 -1.49 4.12
 17 9 10 -2.16 -2.06
 -28 -10 10 0.48 -2.19
 28 -10 -10 0.12 -0.75
 28 -10 -10 0.12 -0.75
 28 10 -10 0.48 2.19
 28 10 -10 0.48 2.19
 26 -10 -10 -0.26 -0.77
 26 -10 -10 -0.26 -0.77
 -26 -10 10 -0.29 -1.87
 26 10 -10 -0.29 1.87
 26 10 -10 -0.29 1.87
 24 -10 -10 3.45 0.60
 24 -10 -10 3.45 0.60
 -24 -10 10 3.85 -4.20
 24 10 -10 3.85 4.20
 24 10 -10 3.85 4.20
 22 -10 -10 0.43 2.14
 -22 -10 10 0.18 0.76
 22 -10 -10 0.43 2.14
 22 10 -10 0.18 -0.76
 22 10 -10 0.18 -0.76
 -20 -10 10 2.41 2.69
 20 -10 -10 1.82 1.48
 20 -10 -10 1.82 1.48
 20 10 -10 2.41 -2.69
 18 -10 -10 -0.51 -0.96
 18 -10 -10 -0.51 -0.96
 -18 -10 10 -0.50 0.30
 18 10 -10 -0.50 -0.30
 16 -10 -10 -1.27 -0.49
 -16 -10 10 -1.35 2.75
 16 -10 -10 -1.27 -0.49
 16 10 -10 -1.35 -2.75
 14 -10 -10 0.61 -0.11
 14 -10 -10 0.61 -0.11
 -14 -10 10 0.23 2.10
 14 10 -10 0.23 -2.10
 12 -10 -10 -0.27 -2.11
 -12 -10 10 -0.65 0.25
 12 -10 -10 -0.27 -2.11
 -12 10 10 -0.27 2.11
 12 10 -10 -0.65 -0.25
 -10 -10 10 0.39 -1.20
 10 -10 -10 0.31 0.54
 10 -10 -10 0.31 0.54
 -10 10 10 0.31 -0.54
 10 10 -10 0.39 1.20
 -8 -10 10 -1.25 2.03
 8 -10 -10 -2.80 -4.19
 8 -10 -10 -2.80 -4.19
 8 10 -10 -1.25 -2.03
 -8 10 10 -2.80 4.19
 6 -10 -10 -0.79 2.06
 6 -10 -10 -0.79 2.06
 -6 -10 10 -0.18 1.87
 6 10 -10 -0.18 -1.87
 -6 10 10 -0.79 -2.06
 4 -10 -10 -1.07 -0.66
 4 -10 -10 -1.07 -0.66
 -4 -10 10 -0.84 -4.03
 -4 10 10 -1.07 0.66
 4 10 -10 -0.84 4.03
 2 -10 -10 -0.99 -1.43
 2 -10 -10 -0.99 -1.43
 -2 -10 10 -0.56 -0.37
 -2 10 10 -0.99 1.43
 2 10 -10 -0.56 0.37
 0 -10 -10 -1.25 2.13
 0 -10 -10 -1.25 2.13
 0 -10 10 -1.76 0.10
 0 10 10 -1.25 -2.13
 0 10 -10 -1.76 -0.10
 -2 -10 -10 -2.18 -2.86
 2 -10 10 -2.03 0.73
 -2 -10 -10 -2.18 -2.86
 -2 10 -10 -2.03 -0.73
 2 10 10 -2.18 2.86
 -4 -10 -10 2.87 -4.99
 4 -10 10 2.76 -0.04
 -4 -10 -10 2.87 -4.99
 -4 10 -10 2.76 0.04
 4 10 10 2.87 4.99
 -6 -10 -10 5.77 -0.66
 -6 -10 -10 5.77 -0.66
 6 10 10 5.77 0.66
 -6 10 -10 4.74 2.62
 -8 -10 -10 5.18 0.93
 -8 -10 -10 5.18 0.93
 8 10 10 5.18 -0.93
 -8 10 -10 4.66 1.44
 -10 -10 -10 4.67 3.63
 -10 10 -10 4.82 -1.55
 10 10 10 4.67 -3.63
 -12 -10 -10 2.73 3.66
 -12 10 -10 3.19 0.62
 12 10 10 2.73 -3.66
 -14 -10 -10 -4.55 1.09
 14 10 10 -4.55 -1.09
 -14 10 -10 -4.07 -1.69
 -16 -10 -10 -2.59 -1.48
 -16 10 -10 -3.03 -2.85
 16 10 10 -2.59 1.48
 27 -11 -10 0.82 0.92
 -27 -11 10 1.28 1.19
 27 11 -10 1.28 -1.19
 -25 -11 10 -3.88 6.42
 25 -11 -10 -3.52 4.69
 25 11 -10 -3.88 -6.42
 23 -11 -10 -1.67 -0.99
 -23 -11 10 -1.89 0.19
 23 -11 -10 -1.67 -0.99
 23 11 -10 -1.89 -0.19
 21 -11 -10 -1.34 -1.70
 21 -11 -10 -1.34 -1.70
 -21 -11 10 -2.14 -1.39
 21 11 -10 -2.14 1.39
 19 -11 -10 3.17 1.60
 -19 -11 10 2.23 1.42
 19 -11 -10 3.17 1.60
 19 11 -10 2.23 -1.42
 17 -11 -10 0.38 2.80
 17 -11 -10 0.38 2.80
 -17 -11 10 1.57 5.67
 17 11 -10 1.57 -5.67
 15 -11 -10 0.51 4.54
 15 -11 -10 0.51 4.54
 -15 -11 10 1.02 -3.06
 15 11 -10 1.02 3.06
 -13 -11 10 -0.83 -5.18
 13 -11 -10 -2.46 0.68
 13 -11 -10 -2.46 0.68
 13 11 -10 -0.83 5.18
 11 -11 -10 -4.05 0.03
 11 -11 -10 -4.05 0.03
 -11 -11 10 -3.25 -1.10
 11 11 -10 -3.25 1.10
 -11 11 10 -4.05 -0.03
 9 -11 -10 -1.21 1.12
 9 -11 -10 -1.21 1.12
 -9 -11 10 -1.78 -0.77
 9 11 -10 -1.78 0.77
 -9 11 10 -1.21 -1.12
 7 -11 -10 1.95 2.42
 -7 -11 10 0.12 -0.94
 7 -11 -10 1.95 2.42
 7 11 -10 0.12 0.94
 -7 11 10 1.95 -2.42
 -5 -11 10 1.81 1.19
 5 -11 -10 2.04 1.16
 5 -11 -10 2.04 1.16
 -5 11 10 2.04 -1.16
 5 11 -10 1.81 -1.19
 3 -11 -10 -1.33 1.59
 3 -11 -10 -1.33 1.59
 -3 -11 10 -0.97 0.82
 3 11 -10 -0.97 -0.82
 -3 11 10 -1.33 -1.59
 1 -11 -10 -2.60 4.36
 1 -11 -10 -2.60 4.36
 -1 -11 10 -2.37 2.58
 -1 11 10 -2.60 -4.36
 1 11 -10 -2.37 -2.58
 -1 -11 -10 1.04 -2.42
 -1 -11 -10 1.04 -2.42
 1 -11 10 1.67 -2.89
 1 11 10 1.04 2.42
 -1 11 -10 1.67 2.89
 -3 -11 -10 1.85 2.03
 3 -11 10 0.73 -6.07
 -3 -11 -10 1.85 2.03
 3 11 10 1.85 -2.03
 -3 11 -10 0.73 6.07
 -5 -11 -10 -0.63 0.05
 5 -11 10 0.53 -1.86
 -5 -11 -10 -0.63 0.05
 5 11 10 -0.63 -0.05
 -5 11 -10 0.53 1.86
 -7 -11 -10 -1.24 -0.94
 -7 -11 -10 -1.24 -0.94
 7 11 10 -1.24 0.94
 -7 11 -10 -1.73 2.77
 -9 -11 -10 -3.50 -4.02
 -9 11 -10 -2.87 2.99
 9 11 10 -3.50 4.02
 -11 -11 -10 -7.38 -6.92
 -11 11 -10 -7.61 4.95
 11 11 10 -7.38 6.92
 -13 -11 -10 0.36 -3.76
 -13 11 -10 0.28 4.33
 13 11 10 0.36 3.76
 26 -12 -10 1.20 -2.63
 -26 -12 10 1.74 -3.36
 26 12 -10 1.74 3.36
 24 -12 -10 5.13 -5.76
 -24 -12 10 5.56 -6.02
 24 12 -10 5.56 6.02
 -22 -12 10 5.33 -0.74
 22 -12 -10 4.26 -0.25
 22 12 -10 5.33 0.74
 20 -12 -10 0.07 1.30
 -20 -12 10 0.34 -4.83
 20 12 -10 0.34 4.83
 18 -12 -10 2.49 -2.30
 -18 -12 10 2.27 -5.36
 18 12 -10 2.27 5.36
 16 -12 -10 0.45 -6.19
 16 -12 -10 0.45 -6.19
 -16 -12 10 -0.45 -1.29
 16 12 -10 -0.45 1.29
 -14 -12 10 -0.15 12.36
 14 -12 -10 1.04 -12.12
 14 -12 -10 1.04 -12.12
 14 12 -10 -0.15 -12.36
 12 -12 -10 2.31 -1.29
 12 -12 -10 2.31 -1.29
 -12 -12 10 1.07 6.97
 12 12 -10 1.07 -6.97
 -10 -12 10 3.34 -2.98
 10 -12 -10 4.06 -0.76
 10 -12 -10 4.06 -0.76
 10 12 -10 3.34 2.98
 -10 12 10 4.06 0.76
 8 -12 -10 1.20 4.50
 8 -12 -10 1.20 4.50
 -8 -12 10 2.18 -0.51
 -8 12 10 1.20 -4.50
 8 12 -10 2.18 0.51
 6 -12 -10 -1.30 0.29
 6 -12 -10 -1.30 0.29
 -6 -12 10 0.47 -3.25
 6 12 -10 0.47 3.25
 -6 12 10 -1.30 -0.29
 4 -12 -10 3.01 -0.37
 -4 -12 10 2.64 -0.33
 4 -12 -10 3.01 -0.37
 4 12 -10 2.64 0.33
 -4 12 10 3.01 0.37
 2 -12 -10 5.67 -4.09
 -2 -12 10 5.08 -4.29
 2 -12 -10 5.67 -4.09
 -2 12 10 5.67 4.09
 2 12 -10 5.08 4.29
 0 -12 -10 3.38 -5.15
 0 -12 -10 3.38 -5.15
 0 -12 10 3.66 -2.72
 0 12 10 3.38 5.15
 0 12 -10 3.66 2.72
 -2 -12 -10 1.10 0.00
 2 -12 10 1.69 3.48
 -2 -12 -10 1.10 0.00
 2 12 10 1.10 0.00
 -2 12 -10 1.69 -3.48
 -4 -12 -10 -0.09 0.88
 4 -12 10 0.78 0.76
 -4 -12 -10 -0.09 0.88
 4 12 10 -0.09 -0.88
 -4 12 -10 0.78 -0.76
 -6 -12 -10 2.14 0.21
 -6 -12 -10 2.14 0.21
 6 12 10 2.14 -0.21
 -6 12 -10 2.70 -0.32
 -8 -12 -10 0.75 -2.43
 -8 -12 -10 0.75 -2.43
 8 12 10 0.75 2.43
 -8 12 -10 1.64 1.15
 -10 -12 -10 5.00 3.15
 -10 12 -10 5.72 -2.55
 10 12 10 5.00 -3.15
 -12 -12 -10 2.23 1.76
 -12 12 -10 2.75 -2.68
 12 12 10 2.23 -1.76
 23 -13 -10 -4.06 2.95
 -23 -13 10 -4.90 2.02
 23 13 -10 -4.90 -2.02
 21 -13 -10 2.75 -3.35
 -21 -13 10 1.75 4.28
 21 13 -10 1.75 -4.28
 -19 -13 10 -2.77 9.83
 19 -13 -10 -2.98 -8.74
 19 13 -10 -2.77 -9.83
 -17 -13 10 -2.44 8.32
 17 -13 -10 -2.03 -4.40
 17 13 -10 -2.44 -8.32
 15 -13 -10 0.01 5.63
 -15 -13 10 0.23 -4.35
 15 13 -10 0.23 4.35
 13 -13 -10 0.85 8.28
 -13 -13 10 1.73 -11.20
 13 13 -10 1.73 11.20
 11 -13 -10 2.15 -1.72
 -11 -13 10 2.11 -3.70
 11 13 -10 2.11 3.70
 9 -13 -10 -0.51 -5.87
 -9 -13 10 0.18 5.41
 9 -13 -10 -0.51 -5.87
 9 13 -10 0.18 -5.41
 -9 13 10 -0.51 5.87
 -7 -13 10 0.54 2.50
 7 -13 -10 1.87 -6.29
 7 -13 -10 1.87 -6.29
 -7 13 10 1.87 6.29
 7 13 -10 0.54 -2.50
 -5 -13 10 -1.37 3.92
 5 -13 -10 -0.74 -4.97
 5 -13 -10 -0.74 -4.97
 5 13 -10 -1.37 -3.92
 -5 13 10 -0.74 4.97
 3 -13 -10 -2.51 -1.55
 -3 -13 10 -2.71 3.09
 3 -13 -10 -2.51 -1.55
 -3 13 10 -2.51 1.55
 3 13 -10 -2.71 -3.09
 -1 -13 10 -2.53 1.60
 1 -13 -10 -2.18 5.04
 1 -13 -10 -2.18 5.04
 -1 13 10 -2.18 -5.04
 1 13 -10 -2.53 -1.60
 -1 -13 -10 0.51 7.63
 1 -13 10 -0.72 -3.65
 -1 -13 -10 0.51 7.63
 1 13 10 0.51 -7.63
 -1 13 -10 -0.72 3.65
 -3 -13 -10 0.52 -2.37
 3 -13 10 1.03 -1.34
 -3 -13 -10 0.52 -2.37
 -3 13 -10 1.03 1.34
 3 13 10 0.52 2.37
 -5 -13 -10 -3.13 -3.09
 -5 -13 -10 -3.13 -3.09
 -5 13 -10 -3.60 0.23
 5 13 10 -3.13 3.09
 -7 -13 -10 -2.96 0.51
 -7 -13 -10 -2.96 0.51
 7 13 10 -2.96 -0.51
 -7 13 -10 -1.46 -4.91
 -9 -13 -10 -3.06 -1.87
 9 13 10 -3.06 1.87
 -9 13 -10 -3.39 -0.74
 -20 -14 10 0.88 -3.63
 20 -14 -10 0.80 3.71
 20 14 -10 0.88 3.63
 18 -14 -10 2.62 9.22
 -18 -14 10 2.63 -8.71
 18 14 -10 2.63 8.71
 -16 -14 10 2.61 -1.34
 16 -14 -10 2.54 -0.09
 16 14 -10 2.61 1.34
 14 -14 -10 -3.43 -7.28
 -14 -14 10 -2.37 7.19
 14 14 -10 -2.37 -7.19
 -12 -14 10 -0.83 8.20
 12 -14 -10 -0.44 -7.46
 12 14 -10 -0.83 -8.20
 10 -14 -10 2.99 2.74
 -10 -14 10 3.32 1.34
 10 14 -10 3.32 -1.34
 8 -14 -10 4.62 -3.01
 -8 -14 10 2.65 -3.71
 -8 14 10 4.62 3.01
 8 14 -10 2.65 3.71
 -6 -14 10 4.44 -4.16
 6 -14 -10 4.59 0.17
 6 14 -10 4.44 4.16
 -6 14 10 4.59 -0.17
 4 -14 -10 5.41 1.20
 -4 -14 10 5.79 -7.79
 4 14 -10 5.79 7.79
 -4 14 10 5.41 -1.20
 -2 -14 10 5.91 -1.62
 2 -14 -10 5.24 -0.65
 -2 14 10 5.24 0.65
 2 14 -10 5.91 1.62
 0 -14 -10 1.92 -3.72
 0 -14 -10 1.92 -3.72
 0 -14 10 2.64 4.05
 0 14 -10 2.64 -4.05
 0 14 10 1.92 3.72
 2 -14 10 -0.33 5.89
 -2 -14 -10 -1.04 2.44
 -2 -14 -10 -1.04 2.44
 2 14 10 -1.04 -2.44
 -2 14 -10 -0.33 -5.89
 -4 -14 -10 1.11 6.79
 -4 -14 -10 1.11 6.79
 -4 14 -10 1.79 -6.76
 4 14 10 1.11 -6.79
 -6 -14 -10 0.73 2.43
 -6 -14 -10 0.73 2.43
 -6 14 -10 0.78 2.42
 6 14 10 0.73 -2.43
 -8 -14 -10 2.57 2.15
 -8 14 -10 1.83 0.44
 8 14 10 2.57 -2.15
 -17 -15 10 -0.17 1.57
 17 -15 -10 0.45 -2.88
 17 15 -10 -0.17 -1.57
 -15 -15 10 1.80 -1.77
 15 -15 -10 2.93 1.80
 15 15 -10 1.80 1.77
 13 -15 -10 5.16 4.08
 -13 -15 10 3.29 -4.31
 13 15 -10 3.29 4.31
 11 -15 -10 -3.43 -0.85
 -11 -15 10 -3.43 -1.82
 11 15 -10 -3.43 1.82
 -9 -15 10 -2.97 -1.12
 9 -15 -10 -3.53 2.81
 9 15 -10 -2.97 1.12
 7 -15 -10 -3.36 6.97
 -7 -15 10 -1.11 -1.13
 7 15 -10 -1.11 1.13
 -7 15 10 -3.36 -6.97
 5 -15 -10 -4.20 5.18
 -5 -15 10 -3.66 4.66
 5 15 -10 -3.66 -4.66
 -5 15 10 -4.20 -5.18
 -3 -15 10 -1.86 1.29
 3 -15 -10 -1.95 3.19
 -3 15 10 -1.95 -3.19
 3 15 -10 -1.86 -1.29
 -1 -15 10 -1.72 0.43
 1 -15 -10 -1.75 1.62
 -1 15 10 -1.75 -1.62
 1 15 -10 -1.72 -0.43
 1 -15 10 2.53 -2.51
 -1 -15 -10 1.93 -2.56
 1 15 10 1.93 2.56
 -1 15 -10 2.53 2.51
 -3 -15 -10 2.24 -5.01
 3 -15 10 1.77 -6.29
 -3 15 -10 1.77 6.29
 3 15 10 2.24 5.01
 -5 -15 -10 0.75 -3.13
 -5 15 -10 0.48 -0.33
 5 15 10 0.75 3.13
 12 -16 -10 -0.56 1.24
 -12 -16 10 0.05 0.29
 12 16 -10 0.05 -0.29
 -10 -16 10 2.83 0.67
 10 -16 -10 3.28 0.34
 10 16 -10 2.83 -0.67
 8 -16 -10 0.74 -2.20
 -8 -16 10 0.56 3.96
 8 16 -10 0.56 -3.96
 6 -16 -10 2.64 -4.86
 -6 -16 10 1.82 3.20
 6 16 -10 1.82 -3.20
 -4 -16 10 0.79 2.14
 4 -16 -10 1.02 -2.36
 -4 16 10 1.02 2.36
 4 16 -10 0.79 -2.14
 2 -16 -10 -0.44 0.00
 -2 -16 10 0.60 2.07
 -2 16 10 -0.44 0.00
 2 16 -10 0.60 -2.07
 0 -16 -10 -0.46 1.08
 0 -16 10 -0.85 1.04
 0 16 10 -0.46 -1.08
 35 -1 -11 3.32 -1.17
 35 1 -11 -3.95 -0.53
 33 -1 -11 -0.27 -0.85
 33 1 -11 -0.12 -0.64
 31 -1 -11 1.54 -1.01
 31 1 -11 -1.29 -0.42
 29 -1 -11 -2.09 -1.36
 29 1 -11 1.86 2.82
 27 -1 -11 -3.70 -4.70
 27 1 -11 5.01 -4.80
 25 -1 -11 3.40 -5.13
 25 1 -11 -2.19 0.92
 23 -1 -11 0.36 0.63
 23 1 -11 -0.57 -3.88
 21 -1 -11 -2.22 -0.10
 21 1 -11 2.02 -2.45
 19 -1 -11 -11.19 2.76
 19 -1 -11 -11.19 2.76
 19 1 -11 11.74 -3.20
 19 1 -11 11.74 -3.20
 17 -1 -11 -6.16 2.62
 17 -1 -11 -6.16 2.62
 17 1 -11 6.81 -4.26
 17 1 -11 6.81 -4.26
 15 -1 -11 -4.57 -0.18
 15 -1 -11 -4.57 -0.18
 15 1 -11 4.56 0.85
 15 1 -11 4.56 0.85
 13 -1 -11 5.66 1.89
 13 -1 -11 5.66 1.89
 13 1 -11 -6.17 0.45
 13 1 -11 -6.17 0.45
 11 -1 -11 6.70 -0.54
 11 -1 -11 6.70 -0.54
 11 -1 -11 6.70 -0.54
 11 1 -11 -6.76 3.42
 11 1 -11 -6.76 3.42
 9 -1 -11 -23.61 3.80
 9 -1 -11 -23.61 3.80
 9 1 -11 23.05 -4.58
 9 1 -11 23.05 -4.58
 7 -1 -11 18.19 0.61
 7 -1 -11 18.19 0.61
 7 1 -11 -17.56 -1.08
 5 -1 -11 -8.28 -5.56
 5 -1 -11 -8.28 -5.56
 5 1 -11 9.04 3.03
 -3 -1 11 -26.57 0.41
 3 -1 -11 26.59 -4.95
 3 -1 -11 26.59 -4.95
 3 1 -11 -26.57 -0.41
 1 -1 -11 16.68 -5.50
 1 1 -11 -15.69 4.67
 -1 -1 -11 -5.28 -2.94
 -1 1 -11 4.91 0.42
 -3 -1 -11 -15.56 2.91
 -3 1 -11 15.78 -3.25
 -5 -1 -11 -9.20 -1.57
 -5 1 -11 9.25 2.09
 -7 -1 -11 -0.20 3.33
 -7 1 -11 0.41 -2.77
 -9 -1 -11 3.40 2.09
 -9 1 -11 -3.23 -1.59
 -11 -1 -11 1.03 0.12
 -11 1 -11 -1.10 -1.33
 -13 -1 -11 0.96 -2.65
 -13 1 -11 -0.29 1.37
 -15 -1 -11 -3.35 6.69
 -15 1 -11 3.27 -5.08
 -17 -1 -11 -1.24 -3.70
 -17 1 -11 0.32 0.94
 -19 -1 -11 1.82 2.39
 -19 1 -11 -1.24 -2.52
 34 -2 -11 -2.93 -0.56
 34 2 -11 2.90 -0.73
 32 -2 -11 -2.16 2.24
 32 2 -11 0.90 -1.23
 30 -2 -11 -0.18 1.74
 30 2 -11 -0.85 -1.94
 28 -2 -11 4.90 3.16
 28 2 -11 -4.65 0.43
 26 -2 -11 4.09 2.57
 26 2 -11 -4.72 0.40
 24 -2 -11 -5.90 0.02
 24 2 -11 6.02 -0.16
 22 -2 -11 -11.54 -1.25
 22 -2 -11 -11.54 -1.25
 22 2 -11 11.70 -0.02
 22 2 -11 11.70 -0.02
 20 -2 -11 -2.80 -0.61
 20 -2 -11 -2.80 -0.61
 20 2 -11 2.97 3.04
 20 2 -11 2.97 3.04
 18 -2 -11 3.47 -3.09
 18 -2 -11 3.47 -3.09
 18 2 -11 -3.13 4.57
 18 2 -11 -3.13 4.57
 16 -2 -11 2.80 -1.13
 16 2 -11 -2.97 2.37
 16 2 -11 -2.97 2.37
 14 -2 -11 -2.89 0.34
 14 2 -11 4.02 -4.13
 14 2 -11 4.02 -4.13
 12 -2 -11 -26.36 2.78
 12 -2 -11 -26.36 2.78
 12 2 -11 26.78 -4.78
 12 2 -11 26.78 -4.78
 10 -2 -11 -4.64 1.66
 10 -2 -11 -4.64 1.66
 10 2 -11 5.41 -3.35
 10 2 -11 5.41 -3.35
 8 -2 -11 -4.40 -3.58
 8 -2 -11 -4.40 -3.58
 8 2 -11 4.43 1.84
 6 -2 -11 3.84 -4.37
 -6 -2 11 -4.86 -3.01
 6 -2 -11 3.84 -4.37
 6 2 -11 -4.86 3.01
 6 2 -11 -4.86 3.01
 4 -2 -11 17.66 -1.44
 4 -2 -11 17.66 -1.44
 -4 -2 11 -17.48 -1.83
 4 2 -11 -17.48 1.83
 2 -2 -11 -6.55 2.85
 2 -2 -11 -6.55 2.85
 -2 -2 11 5.57 4.30
 2 2 -11 5.57 -4.30
 -2 2 11 -6.55 -2.85
 0 -2 -11 3.37 5.07
 0 -2 -11 3.37 5.07
 0 2 11 3.37 -5.07
 0 2 -11 -4.64 -9.24
 -2 -2 -11 10.33 5.78
 2 2 11 10.33 -5.78
 -2 2 -11 -10.48 -4.18
 -4 -2 -11 6.37 2.14
 4 2 11 6.37 -2.14
 -4 2 -11 -7.35 -6.28
 -6 -2 -11 -0.49 -0.50
 -6 2 -11 0.90 -2.04
 6 2 11 -0.49 0.50
 -8 -2 -11 -3.89 -3.30
 8 2 11 -3.89 3.30
 -8 2 -11 3.91 0.91
 -10 -2 -11 0.54 -2.49
 -10 2 -11 0.81 -2.09
 -12 -2 -11 2.98 4.24
 -12 2 -11 -2.77 -3.35
 -14 -2 -11 2.74 -2.04
 -14 2 -11 -2.70 -6.59
 -16 -2 -11 0.91 0.92
 -16 2 -11 -0.47 -1.52
 -18 -2 -11 -0.45 -2.97
 -18 2 -11 0.44 1.84
 -20 -2 -11 0.10 -2.61
 -20 2 -11 -1.21 1.74
 33 -3 -11 1.38 -0.11
 33 3 -11 -0.81 2.65
 31 -3 -11 2.10 -4.79
 31 3 -11 0.44 -0.76
 29 -3 -11 0.29 -4.62
 29 3 -11 -0.30 -3.53
 27 -3 -11 -2.71 -1.08
 27 3 -11 2.62 1.54
 25 -3 -11 -2.01 -0.84
 25 -3 -11 -2.01 -0.84
 25 3 -11 1.84 -0.31
 23 -3 -11 8.65 0.71
 23 -3 -11 8.65 0.71
 23 3 -11 -9.03 4.66
 23 3 -11 -9.03 4.66
 21 -3 -11 3.85 1.25
 21 -3 -11 3.85 1.25
 21 3 -11 -3.07 0.53
 21 3 -11 -3.07 0.53
 19 -3 -11 -4.87 0.24
 19 -3 -11 -4.87 0.24
 19 3 -11 4.93 0.05
 19 3 -11 4.93 0.05
 17 -3 -11 -14.70 -1.14
 17 3 -11 14.82 -0.45
 17 3 -11 14.82 -0.45
 15 -3 -11 -14.98 4.56
 15 -3 -11 -14.98 4.56
 15 3 -11 14.19 -1.78
 15 3 -11 14.19 -1.78
 13 -3 -11 -2.92 -0.48
 13 -3 -11 -2.92 -0.48
 13 3 -11 2.07 3.36
 13 3 -11 2.07 3.36
 11 -3 -11 -10.28 -3.10
 11 -3 -11 -10.28 -3.10
 11 3 -11 10.45 2.08
 11 3 -11 10.45 2.08
 9 -3 -11 1.15 -5.35
 -9 -3 11 -1.76 -13.14
 9 3 -11 -1.76 13.14
 9 3 -11 -1.76 13.14
 7 -3 -11 -18.17 -2.86
 -7 3 11 -18.17 2.86
 7 3 -11 19.19 5.71
 7 3 -11 19.19 5.71
 5 -3 -11 -6.59 -0.96
 -5 -3 11 7.17 -4.23
 5 3 -11 7.17 4.23
 5 3 -11 7.17 4.23
 -5 3 11 -6.59 0.96
 3 -3 -11 -12.98 -5.83
 3 -3 -11 -12.98 -5.83
 -3 -3 11 13.17 -7.65
 -3 3 11 -12.98 5.83
 3 3 -11 13.17 7.65
 3 3 -11 13.17 7.65
 1 -3 -11 8.63 -2.08
 -1 -3 11 -7.51 -4.09
 1 -3 -11 8.63 -2.08
 1 3 -11 -7.51 4.09
 -1 3 11 8.63 2.08
 -1 -3 -11 -2.24 -2.94
 -1 -3 -11 -2.24 -2.94
 1 -3 11 2.18 -5.29
 -1 3 -11 2.18 5.29
 1 3 11 -2.24 2.94
 -3 -3 -11 1.00 -0.85
 -3 -3 -11 1.00 -0.85
 3 3 11 1.00 0.85
 -3 3 -11 -0.23 1.11
 -5 -3 -11 1.84 1.73
 5 3 11 1.84 -1.73
 -5 3 -11 -1.65 -0.51
 -7 -3 -11 1.08 0.37
 7 3 11 1.08 -0.37
 -7 3 -11 -1.97 -2.81
 -9 -3 -11 -0.87 0.96
 9 3 11 -0.87 -0.96
 -9 3 -11 0.20 -2.94
 -11 -3 -11 -2.28 -0.90
 -11 3 -11 0.95 0.27
 11 3 11 -2.28 0.90
 -13 -3 -11 -6.96 -2.40
 13 3 11 -6.96 2.40
 -13 3 -11 5.68 2.67
 -15 -3 -11 1.08 -7.17
 -15 3 -11 -1.44 8.28
 -17 -3 -11 3.62 -0.08
 -17 3 -11 -4.33 -0.02
 -19 -3 -11 -1.24 0.75
 -19 3 -11 2.53 -1.87
 34 -4 -11 1.43 0.05
 -34 -4 11 -1.17 1.60
 34 4 -11 -1.17 -1.60
 -32 -4 11 -2.44 2.22
 32 -4 -11 1.41 -1.77
 32 4 -11 -2.44 -2.22
 30 -4 -11 -3.60 -0.83
 -30 -4 11 3.11 -2.86
 30 4 -11 3.11 2.86
 28 -4 -11 -1.84 -1.53
 28 -4 -11 -1.84 -1.53
 28 4 -11 1.76 -0.07
 26 -4 -11 0.20 0.19
 26 -4 -11 0.20 0.19
 26 4 -11 -0.89 -0.42
 24 -4 -11 -1.09 2.02
 24 -4 -11 -1.09 2.02
 24 4 -11 1.49 -4.14
 24 4 -11 1.49 -4.14
 22 -4 -11 -2.11 -0.25
 22 -4 -11 -2.11 -0.25
 22 4 -11 2.11 -1.83
 22 4 -11 2.11 -1.83
 20 -4 -11 -2.46 4.21
 20 -4 -11 -2.46 4.21
 20 4 -11 0.88 -4.44
 20 4 -11 0.88 -4.44
 18 -4 -11 -0.06 3.32
 18 -4 -11 -0.06 3.32
 18 4 -11 -0.21 -6.96
 18 4 -11 -0.21 -6.96
 -16 -4 11 0.60 1.09
 16 -4 -11 -0.16 1.65
 16 -4 -11 -0.16 1.65
 16 4 -11 0.60 -1.09
 16 4 -11 0.60 -1.09
 -14 -4 11 5.48 -2.16
 14 -4 -11 -4.52 -6.04
 14 -4 -11 -4.52 -6.04
 14 4 -11 5.48 2.16
 14 4 -11 5.48 2.16
 12 -4 -11 10.98 -5.43
 -12 -4 11 -11.88 -2.76
 12 -4 -11 10.98 -5.43
 12 4 -11 -11.88 2.76
 12 4 -11 -11.88 2.76
 -10 -4 11 -5.06 7.73
 10 -4 -11 5.41 -0.02
 10 -4 -11 5.41 -0.02
 -10 4 11 5.41 0.02
 10 4 -11 -5.06 -7.73
 10 4 -11 -5.06 -7.73
 8 -4 -11 7.54 -3.91
 -8 -4 11 -7.04 4.75
 8 -4 -11 7.54 -3.91
 8 4 -11 -7.04 -4.75
 -8 4 11 7.54 3.91
 8 4 -11 -7.04 -4.75
 6 -4 -11 6.74 -1.24
 -6 -4 11 -7.01 0.45
 6 -4 -11 6.74 -1.24
 6 4 -11 -7.01 -0.45
 -6 4 11 6.74 1.24
 6 4 -11 -7.01 -0.45
 4 -4 -11 -0.55 0.15
 4 -4 -11 -0.55 0.15
 4 4 -11 0.31 -0.82
 4 4 -11 0.31 -0.82
 -4 4 11 -0.55 -0.15
 2 -4 -11 1.90 -0.10
 -2 -4 11 -2.35 -1.55
 -2 4 11 1.90 0.10
 2 4 -11 -2.35 1.55
 2 4 -11 -2.35 1.55
 0 -4 11 5.40 1.25
 0 -4 -11 -4.77 -1.56
 0 4 11 -4.77 1.56
 0 4 -11 5.40 -1.25
 0 4 -11 5.40 -1.25
 -2 -4 -11 -0.60 -4.28
 2 -4 11 0.17 2.51
 2 4 11 -0.60 4.28
 -2 4 -11 0.17 -2.51
 -4 -4 -11 1.68 -1.02
 -4 -4 -11 1.68 -1.02
 -4 4 -11 -3.04 0.93
 4 4 11 1.68 1.02
 -6 -4 -11 1.13 -1.55
 -6 4 -11 -0.89 1.17
 6 4 11 1.13 1.55
 -8 -4 -11 2.34 2.68
 8 4 11 2.34 -2.68
 -8 4 -11 -2.29 0.54
 -10 -4 -11 -3.60 0.90
 10 4 11 -3.60 -0.90
 -10 4 -11 4.05 1.87
 -12 -4 -11 -0.53 0.16
 12 4 11 -0.53 -0.16
 -12 4 -11 1.85 -0.55
 -14 -4 -11 0.34 2.85
 14 4 11 0.34 -2.85
 -14 4 -11 -0.76 1.05
 -16 -4 -11 -3.64 3.53
 16 4 11 -3.64 -3.53
 -16 4 -11 4.02 -4.17
 -18 -4 -11 -0.73 -0.10
 -18 4 -11 -0.49 0.90
 33 -5 -11 1.37 0.22
 -33 -5 11 -1.53 -1.30
 33 5 -11 -1.53 1.30
 31 -5 -11 -0.80 3.87
 31 -5 -11 -0.80 3.87
 -31 -5 11 -0.42 -4.50
 31 5 -11 -0.42 4.50
 29 -5 -11 3.76 7.35
 29 -5 -11 3.76 7.35
 -29 -5 11 -4.24 -2.16
 29 5 -11 -4.24 2.16
 27 -5 -11 -2.72 2.96
 -27 -5 11 2.83 -3.15
 27 -5 -11 -2.72 2.96
 27 5 -11 2.83 3.15
 25 -5 -11 -4.63 1.97
 25 -5 -11 -4.63 1.97
 -25 -5 11 5.18 -1.96
 25 5 -11 5.18 1.96
 25 5 -11 5.18 1.96
 23 -5 -11 -5.54 -0.02
 -23 -5 11 4.99 1.46
 23 -5 -11 -5.54 -0.02
 23 5 -11 4.99 -1.46
 23 5 -11 4.99 -1.46
 -21 -5 11 1.65 0.96
 21 -5 -11 -0.65 -6.58
 21 -5 -11 -0.65 -6.58
 21 5 -11 1.65 -0.96
 21 5 -11 1.65 -0.96
 19 -5 -11 5.27 -5.24
 -19 -5 11 -4.35 -1.10
 19 -5 -11 5.27 -5.24
 19 5 -11 -4.35 1.10
 19 5 -11 -4.35 1.10
 17 -5 -11 8.85 -1.75
 -17 -5 11 -8.84 0.15
 17 -5 -11 8.85 -1.75
 17 5 -11 -8.84 -0.15
 17 5 -11 -8.84 -0.15
 15 -5 -11 11.40 0.45
 15 -5 -11 11.40 0.45
 -15 -5 11 -11.26 5.12
 15 5 -11 -11.26 -5.12
 15 5 -11 -11.26 -5.12
 -13 -5 11 2.47 7.16
 13 -5 -11 -2.26 7.22
 13 -5 -11 -2.26 7.22
 13 5 -11 2.47 -7.16
 13 5 -11 2.47 -7.16
 -13 5 11 -2.26 -7.22
 11 -5 -11 3.96 0.14
 11 -5 -11 3.96 0.14
 -11 -5 11 -3.29 -2.04
 11 5 -11 -3.29 2.04
 -11 5 11 3.96 -0.14
 11 5 -11 -3.29 2.04
 9 -5 -11 2.20 2.19
 9 -5 -11 2.20 2.19
 -9 -5 11 -3.65 3.20
 9 5 -11 -3.65 -3.20
 -9 5 11 2.20 -2.19
 9 5 -11 -3.65 -3.20
 7 -5 -11 10.66 5.66
 -7 -5 11 -11.06 3.71
 7 -5 -11 10.66 5.66
 -7 5 11 10.66 -5.66
 7 5 -11 -11.06 -3.71
 7 5 -11 -11.06 -3.71
 5 -5 -11 -0.46 5.00
 -5 -5 11 0.82 4.04
 5 -5 -11 -0.46 5.00
 5 5 -11 0.82 -4.04
 5 5 -11 0.82 -4.04
 -5 5 11 -0.46 -5.00
 3 -5 -11 -7.07 3.85
 -3 -5 11 8.00 4.11
 3 -5 -11 -7.07 3.85
 -3 5 11 -7.07 -3.85
 3 5 -11 8.00 -4.11
 3 5 -11 8.00 -4.11
 1 -5 -11 -12.35 -0.58
 1 -5 -11 -12.35 -0.58
 1 5 -11 12.60 3.36
 1 5 -11 12.60 3.36
 -1 5 11 -12.35 0.58
 1 -5 11 -4.26 -4.91
 -1 -5 -11 3.33 0.71
 -1 5 -11 -4.26 4.91
 1 5 11 3.33 -0.71
 -1 5 -11 -4.26 4.91
 3 -5 11 -1.87 -2.69
 -3 -5 -11 2.75 -1.67
 3 5 11 2.75 1.67
 -3 5 -11 -1.87 2.69
 -3 5 -11 -1.87 2.69
 -5 -5 -11 -1.75 0.57
 -5 -5 -11 -1.75 0.57
 5 5 11 -1.75 -0.57
 -5 5 -11 1.86 0.12
 -7 -5 -11 -3.30 1.32
 -7 5 -11 2.50 -0.65
 7 5 11 -3.30 -1.32
 -9 -5 -11 -0.20 -4.83
 -9 5 -11 0.58 3.24
 9 5 11 -0.20 4.83
 -11 -5 -11 3.17 -6.98
 11 5 11 3.17 6.98
 -11 5 -11 -4.71 4.73
 -13 -5 -11 6.04 0.51
 -13 5 -11 -5.60 -0.61
 13 5 11 6.04 -0.51
 -15 -5 -11 2.81 -2.38
 15 5 11 2.81 2.38
 -17 -5 -11 -0.63 -4.42
 17 5 11 -0.63 4.42
 -19 -5 -11 0.60 -2.19
 19 5 11 0.60 2.19
 -32 -6 11 1.35 1.44
 32 -6 -11 -1.28 0.69
 32 -6 -11 -1.28 0.69
 32 6 -11 1.35 -1.44
 30 -6 -11 -0.73 -0.24
 30 -6 -11 -0.73 -0.24
 -30 -6 11 1.58 4.65
 30 6 -11 1.58 -4.65
 28 -6 -11 -0.21 -2.86
 28 -6 -11 -0.21 -2.86
 -28 -6 11 1.01 4.18
 28 6 -11 1.01 -4.18
 -26 -6 11 -3.99 1.76
 26 -6 -11 3.50 0.61
 26 -6 -11 3.50 0.61
 26 6 -11 -3.99 -1.76
 26 6 -11 -3.99 -1.76
 24 -6 -11 4.12 -1.48
 -24 -6 11 -4.17 -3.29
 24 -6 -11 4.12 -1.48
 24 6 -11 -4.17 3.29
 24 6 -11 -4.17 3.29
 22 -6 -11 4.87 5.04
 22 -6 -11 4.87 5.04
 -22 -6 11 -5.44 -4.26
 22 6 -11 -5.44 4.26
 22 6 -11 -5.44 4.26
 20 -6 -11 1.09 3.27
 20 -6 -11 1.09 3.27
 -20 -6 11 -1.42 -1.48
 20 6 -11 -1.42 1.48
 20 6 -11 -1.42 1.48
 18 -6 -11 -3.64 1.04
 18 -6 -11 -3.64 1.04
 -18 -6 11 3.84 -1.22
 18 6 -11 3.84 1.22
 18 6 -11 3.84 1.22
 16 -6 -11 -2.56 -2.90
 -16 -6 11 1.99 -1.73
 16 -6 -11 -2.56 -2.90
 16 6 -11 1.99 1.73
 16 6 -11 1.99 1.73
 14 -6 -11 6.28 -5.18
 14 -6 -11 6.28 -5.18
 -14 -6 11 -6.34 -8.00
 14 6 -11 -6.34 8.00
 14 6 -11 -6.34 8.00
 -12 -6 11 -6.28 -0.48
 12 -6 -11 6.21 0.29
 12 -6 -11 6.21 0.29
 12 6 -11 -6.28 0.48
 12 6 -11 -6.28 0.48
 -12 6 11 6.21 -0.29
 10 -6 -11 -1.66 -4.32
 -10 -6 11 1.89 -2.87
 10 -6 -11 -1.66 -4.32
 10 6 -11 1.89 2.87
 -10 6 11 -1.66 4.32
 10 6 -11 1.89 2.87
 8 -6 -11 -13.58 2.10
 -8 -6 11 14.06 -2.10
 8 -6 -11 -13.58 2.10
 8 6 -11 14.06 2.10
 -8 6 11 -13.58 -2.10
 8 6 -11 14.06 2.10
 6 -6 -11 -15.51 1.59
 6 -6 -11 -15.51 1.59
 -6 -6 11 15.08 0.26
 6 6 -11 15.08 -0.26
 -6 6 11 -15.51 -1.59
 6 6 -11 15.08 -0.26
 4 -6 -11 -1.35 1.48
 -4 -6 11 2.49 -5.23
 4 -6 -11 -1.35 1.48
 4 6 -11 2.49 5.23
 4 6 -11 2.49 5.23
 -4 6 11 -1.35 -1.48
 -2 -6 11 -11.07 2.10
 2 -6 -11 10.15 4.80
 2 -6 -11 10.15 4.80
 2 6 -11 -11.07 -2.10
 2 6 -11 -11.07 -2.10
 -2 6 11 10.15 -4.80
 0 -6 11 -6.48 -1.09
 0 -6 -11 6.60 -0.55
 0 -6 -11 6.60 -0.55
 0 6 -11 -6.48 1.09
 0 6 11 6.60 0.55
 0 6 -11 -6.48 1.09
 -2 -6 -11 -3.04 1.90
 2 -6 11 4.00 -2.93
 -2 -6 -11 -3.04 1.90
 -2 6 -11 4.00 2.93
 2 6 11 -3.04 -1.90
 -2 6 -11 4.00 2.93
 -4 -6 -11 -4.46 -0.05
 -4 -6 -11 -4.46 -0.05
 -4 6 -11 3.48 2.89
 4 6 11 -4.46 0.05
 -4 6 -11 3.48 2.89
 -6 -6 -11 1.45 -2.46
 -6 -6 -11 1.45 -2.46
 -6 6 -11 -0.96 3.01
 6 6 11 1.45 2.46
 -6 6 -11 -0.96 3.01
 -8 -6 -11 1.99 0.78
 8 6 11 1.99 -0.78
 -8 6 -11 -2.64 -0.72
 -10 -6 -11 0.69 10.12
 10 6 11 0.69 -10.12
 -12 -6 -11 -0.79 0.59
 12 6 11 -0.79 -0.59
 -14 -6 -11 -5.46 -3.88
 14 6 11 -5.46 3.88
 -16 -6 -11 0.54 2.42
 16 6 11 0.54 -2.42
 -18 -6 -11 -0.05 4.33
 18 6 11 -0.05 -4.33
 31 -7 -11 2.69 0.38
 31 -7 -11 2.69 0.38
 -31 -7 11 -1.45 -0.72
 31 7 -11 -1.45 0.72
 -29 -7 11 -0.85 -4.34
 29 -7 -11 0.38 -1.12
 29 -7 -11 0.38 -1.12
 29 7 -11 -0.85 4.34
 -27 -7 11 2.23 -1.97
 27 -7 -11 -2.48 2.65
 27 -7 -11 -2.48 2.65
 27 7 -11 2.23 1.97
 27 7 -11 2.23 1.97
 25 -7 -11 1.17 1.96
 25 -7 -11 1.17 1.96
 -25 -7 11 -0.60 1.23
 25 7 -11 -0.60 -1.23
 25 7 -11 -0.60 -1.23
 23 -7 -11 -0.61 1.27
 -23 -7 11 0.66 1.18
 23 -7 -11 -0.61 1.27
 23 7 -11 0.66 -1.18
 23 7 -11 0.66 -1.18
 21 -7 -11 -0.82 2.11
 -21 -7 11 1.71 -0.56
 21 -7 -11 -0.82 2.11
 21 7 -11 1.71 0.56
 21 7 -11 1.71 0.56
 19 -7 -11 5.04 -0.35
 19 -7 -11 5.04 -0.35
 -19 -7 11 -5.12 -1.57
 19 7 -11 -5.12 1.57
 19 7 -11 -5.12 1.57
 17 -7 -11 6.09 0.60
 -17 -7 11 -6.57 -2.02
 17 -7 -11 6.09 0.60
 17 7 -11 -6.57 2.02
 17 7 -11 -6.57 2.02
 15 -7 -11 0.01 2.43
 15 -7 -11 0.01 2.43
 -15 -7 11 0.17 3.74
 15 7 -11 0.17 -3.74
 15 7 -11 0.17 -3.74
 13 -7 -11 -3.24 -1.03
 13 -7 -11 -3.24 -1.03
 -13 -7 11 2.75 2.58
 -13 7 11 -3.24 1.03
 13 7 -11 2.75 -2.58
 13 7 -11 2.75 -2.58
 11 -7 -11 -6.57 3.79
 11 -7 -11 -6.57 3.79
 -11 -7 11 6.70 3.35
 11 7 -11 6.70 -3.35
 -11 7 11 -6.57 -3.79
 11 7 -11 6.70 -3.35
 9 -7 -11 1.38 10.08
 -9 -7 11 -1.70 -0.97
 9 -7 -11 1.38 10.08
 9 7 -11 -1.70 0.97
 -9 7 11 1.38 -10.08
 9 7 -11 -1.70 0.97
 7 -7 -11 4.51 2.86
 -7 -7 11 -3.37 -1.30
 7 -7 -11 4.51 2.86
 7 7 -11 -3.37 1.30
 -7 7 11 4.51 -2.86
 7 7 -11 -3.37 1.30
 5 -7 -11 7.90 2.94
 5 -7 -11 7.90 2.94
 -5 -7 11 -9.29 1.56
 -5 7 11 7.90 -2.94
 5 7 -11 -9.29 -1.56
 5 7 -11 -9.29 -1.56
 3 -7 -11 -2.68 0.81
 3 -7 -11 -2.68 0.81
 -3 -7 11 1.60 -1.32
 3 7 -11 1.60 1.32
 -3 7 11 -2.68 -0.81
 1 -7 -11 -3.84 1.63
 1 -7 -11 -3.84 1.63
 -1 -7 11 5.12 -0.15
 -1 7 11 -3.84 -1.63
 1 7 -11 5.12 0.15
 -1 -7 -11 -2.49 0.96
 -1 -7 -11 -2.49 0.96
 1 -7 11 1.45 5.08
 1 7 11 -2.49 -0.96
 -1 7 -11 1.45 -5.08
 3 -7 11 -3.37 3.40
 -3 -7 -11 2.85 -2.91
 -3 -7 -11 2.85 -2.91
 3 7 11 2.85 2.91
 -3 7 -11 -3.37 -3.40
 -5 -7 -11 5.47 0.44
 -5 -7 -11 5.47 0.44
 5 7 11 5.47 -0.44
 -5 7 -11 -5.45 -3.77
 -7 -7 -11 3.02 -0.21
 7 7 11 3.02 0.21
 -7 7 -11 -2.62 -2.37
 -9 -7 -11 2.36 -5.93
 -9 7 -11 -2.93 4.12
 9 7 11 2.36 5.93
 -11 -7 -11 -1.64 0.18
 11 7 11 -1.64 -0.18
 -11 7 -11 0.76 -0.94
 -13 -7 -11 -2.65 5.50
 -13 7 -11 3.44 -2.98
 13 7 11 -2.65 -5.50
 -15 -7 -11 0.12 5.21
 15 7 11 0.12 -5.21
 -15 7 -11 0.77 -0.86
 -17 -7 -11 -1.25 0.89
 17 7 11 -1.25 -0.89
 -17 7 -11 1.10 -2.12
 30 -8 -11 -2.40 1.88
 30 -8 -11 -2.40 1.88
 -30 -8 11 1.41 -3.05
 30 8 -11 1.41 3.05
 -28 -8 11 -1.98 -2.91
 28 -8 -11 2.30 2.86
 28 -8 -11 2.30 2.86
 28 8 -11 -1.98 2.91
 28 8 -11 -1.98 2.91
 26 -8 -11 2.84 -2.90
 -26 -8 11 -3.07 -3.99
 26 -8 -11 2.84 -2.90
 26 8 -11 -3.07 3.99
 26 8 -11 -3.07 3.99
 24 -8 -11 0.38 0.04
 24 -8 -11 0.38 0.04
 -24 -8 11 0.26 -3.38
 24 8 -11 0.26 3.38
 24 8 -11 0.26 3.38
 22 -8 -11 3.23 -0.32
 22 -8 -11 3.23 -0.32
 -22 -8 11 -4.04 3.05
 22 8 -11 -4.04 -3.05
 22 8 -11 -4.04 -3.05
 20 -8 -11 -0.94 1.61
 20 -8 -11 -0.94 1.61
 -20 -8 11 0.15 0.00
 20 8 -11 0.15 0.00
 20 8 -11 0.15 0.00
 18 -8 -11 -1.67 3.37
 -18 -8 11 1.24 0.61
 18 -8 -11 -1.67 3.37
 18 8 -11 1.24 -0.61
 18 8 -11 1.24 -0.61
 -16 -8 11 -0.36 -0.89
 16 -8 -11 0.31 0.93
 16 -8 -11 0.31 0.93
 16 8 -11 -0.36 0.89
 16 8 -11 -0.36 0.89
 14 -8 -11 1.69 0.42
 -14 -8 11 -2.85 2.87
 14 -8 -11 1.69 0.42
 14 8 -11 -2.85 -2.87
 14 8 -11 -2.85 -2.87
 -12 -8 11 -3.24 3.45
 12 -8 -11 2.70 1.00
 12 -8 -11 2.70 1.00
 12 8 -11 -3.24 -3.45
 -12 8 11 2.70 -1.00
 12 8 -11 -3.24 -3.45
 10 -8 -11 2.94 2.30
 -10 -8 11 -2.90 2.07
 10 -8 -11 2.94 2.30
 -10 8 11 2.94 -2.30
 10 8 -11 -2.90 -2.07
 10 8 -11 -2.90 -2.07
 8 -8 -11 4.33 -1.17
 -8 -8 11 -4.25 3.43
 8 -8 -11 4.33 -1.17
 -8 8 11 4.33 1.17
 8 8 -11 -4.25 -3.43
 -6 -8 11 0.94 -2.21
 6 -8 -11 -1.50 -1.93
 6 -8 -11 -1.50 -1.93
 6 8 -11 0.94 2.21
 -6 8 11 -1.50 1.93
 4 -8 -11 -1.16 2.50
 -4 -8 11 2.01 1.06
 4 -8 -11 -1.16 2.50
 4 8 -11 2.01 -1.06
 -4 8 11 -1.16 -2.50
 -2 -8 11 -0.74 -1.27
 2 -8 -11 0.28 -3.52
 2 -8 -11 0.28 -3.52
 2 8 -11 -0.74 1.27
 -2 8 11 0.28 3.52
 0 -8 -11 -2.69 2.33
 0 -8 11 1.84 -3.34
 0 -8 -11 -2.69 2.33
 0 8 11 -2.69 -2.33
 0 8 -11 1.84 3.34
 2 -8 11 0.27 -4.02
 -2 -8 -11 -0.06 4.69
 -2 -8 -11 -0.06 4.69
 2 8 11 -0.06 -4.69
 -2 8 -11 0.27 4.02
 -4 -8 -11 -3.92 5.21
 -4 -8 -11 -3.92 5.21
 4 8 11 -3.92 -5.21
 -4 8 -11 3.72 3.67
 -6 -8 -11 -5.38 1.88
 -6 -8 -11 -5.38 1.88
 -6 8 -11 4.58 6.25
 6 8 11 -5.38 -1.88
 -8 -8 -11 -5.16 3.82
 -8 8 -11 5.15 0.10
 8 8 11 -5.16 -3.82
 -10 -8 -11 -3.09 1.01
 10 8 11 -3.09 -1.01
 -10 8 -11 3.60 2.73
 -12 -8 -11 2.60 -4.62
 12 8 11 2.60 4.62
 -12 8 -11 -1.86 3.41
 -14 -8 -11 5.14 -2.97
 -14 8 -11 -4.93 -2.68
 14 8 11 5.14 2.97
 -16 -8 -11 3.08 -5.46
 16 8 11 3.08 5.46
 -16 8 -11 -2.04 -3.68
 29 -9 -11 -1.37 -3.44
 29 -9 -11 -1.37 -3.44
 -29 -9 11 1.91 4.95
 29 9 -11 1.91 -4.95
 29 9 -11 1.91 -4.95
 27 -9 -11 -2.11 -1.95
 27 -9 -11 -2.11 -1.95
 -27 -9 11 1.93 4.53
 27 9 -11 1.93 -4.53
 27 9 -11 1.93 -4.53
 25 -9 -11 -1.33 0.26
 25 -9 -11 -1.33 0.26
 -25 -9 11 -0.25 5.20
 25 9 -11 -0.25 -5.20
 25 9 -11 -0.25 -5.20
 23 -9 -11 -3.11 -0.78
 23 -9 -11 -3.11 -0.78
 -23 -9 11 2.19 -1.11
 23 9 -11 2.19 1.11
 23 9 -11 2.19 1.11
 21 -9 -11 -0.94 -2.53
 21 -9 -11 -0.94 -2.53
 -21 -9 11 1.45 -0.14
 21 9 -11 1.45 0.14
 21 9 -11 1.45 0.14
 19 -9 -11 -4.45 -4.10
 19 -9 -11 -4.45 -4.10
 -19 -9 11 4.80 1.95
 19 9 -11 4.80 -1.95
 19 9 -11 4.80 -1.95
 17 -9 -11 -6.62 -6.04
 17 -9 -11 -6.62 -6.04
 -17 -9 11 7.37 1.77
 17 9 -11 7.37 -1.77
 17 9 -11 7.37 -1.77
 -15 -9 11 5.76 -4.52
 15 -9 -11 -4.71 -1.27
 15 -9 -11 -4.71 -1.27
 13 -9 -11 0.09 3.41
 -13 -9 11 1.90 -9.12
 13 -9 -11 0.09 3.41
 13 9 -11 1.90 9.12
 -11 -9 11 -2.49 -8.05
 11 -9 -11 3.79 -3.26
 11 -9 -11 3.79 -3.26
 11 9 -11 -2.49 8.05
 -11 9 11 3.79 3.26
 9 -9 -11 0.86 -7.89
 9 -9 -11 0.86 -7.89
 -9 -9 11 -1.72 -2.63
 9 9 -11 -1.72 2.63
 -9 9 11 0.86 7.89
 7 -9 -11 3.87 -2.05
 -7 -9 11 -3.74 -4.37
 7 -9 -11 3.87 -2.05
 -7 9 11 3.87 2.05
 7 9 -11 -3.74 4.37
 5 -9 -11 0.32 -5.95
 -5 -9 11 -0.39 -4.40
 5 -9 -11 0.32 -5.95
 5 9 -11 -0.39 4.40
 -5 9 11 0.32 5.95
 -3 -9 11 -2.94 0.38
 3 -9 -11 2.36 -5.09
 3 -9 -11 2.36 -5.09
 3 9 -11 -2.94 -0.38
 -3 9 11 2.36 5.09
 -1 -9 11 -3.23 3.74
 1 -9 -11 4.29 -0.17
 1 -9 -11 4.29 -0.17
 -1 9 11 4.29 0.17
 1 9 -11 -3.23 -3.74
 -1 -9 -11 -0.50 2.91
 1 -9 11 0.96 0.54
 -1 -9 -11 -0.50 2.91
 1 9 11 -0.50 -2.91
 -1 9 -11 0.96 -0.54
 -3 -9 -11 -2.79 -1.86
 3 -9 11 3.89 -0.48
 -3 -9 -11 -2.79 -1.86
 3 9 11 -2.79 1.86
 -3 9 -11 3.89 0.48
 -5 -9 -11 -0.23 -1.39
 -5 -9 -11 -0.23 -1.39
 5 9 11 -0.23 1.39
 -5 9 -11 0.11 1.23
 -7 -9 -11 0.69 -1.96
 7 9 11 0.69 1.96
 -7 9 -11 -1.71 2.13
 -9 -9 -11 4.03 3.35
 9 9 11 4.03 -3.35
 -9 9 -11 -3.22 3.69
 -11 -9 -11 4.95 5.20
 -11 9 -11 -4.77 1.28
 11 9 11 4.95 -5.20
 -13 -9 -11 -0.98 6.66
 13 9 11 -0.98 -6.66
 -13 9 -11 1.62 7.65
 -15 -9 -11 -4.07 6.20
 -15 9 -11 3.61 7.88
 15 9 11 -4.07 -6.20
 28 -10 -11 2.64 0.95
 28 -10 -11 2.64 0.95
 -28 -10 11 -2.29 -3.04
 28 10 -11 -2.29 3.04
 28 10 -11 -2.29 3.04
 26 -10 -11 -0.17 3.87
 -26 -10 11 1.96 -5.78
 26 -10 -11 -0.17 3.87
 26 10 -11 1.96 5.78
 26 10 -11 1.96 5.78
 -24 -10 11 0.79 0.90
 24 -10 -11 0.57 -1.78
 24 -10 -11 0.57 -1.78
 24 10 -11 0.79 -0.90
 22 -10 -11 -1.53 -0.94
 -22 -10 11 1.93 -0.59
 22 -10 -11 -1.53 -0.94
 22 10 -11 1.93 0.59
 20 -10 -11 1.90 0.81
 20 -10 -11 1.90 0.81
 -20 -10 11 -2.43 -0.15
 20 10 -11 -2.43 0.15
 18 -10 -11 1.63 7.16
 -18 -10 11 -2.22 -1.14
 18 -10 -11 1.63 7.16
 18 10 -11 -2.22 1.14
 -16 -10 11 -3.63 5.72
 16 -10 -11 2.58 12.51
 16 -10 -11 2.58 12.51
 16 10 -11 -3.63 -5.72
 14 -10 -11 -3.22 4.08
 14 -10 -11 -3.22 4.08
 -14 -10 11 1.42 9.93
 14 10 -11 1.42 -9.93
 12 -10 -11 -6.47 3.30
 12 -10 -11 -6.47 3.30
 -12 -10 11 4.30 9.31
 12 10 -11 4.30 -9.31
 10 -10 -11 -4.82 5.04
 10 -10 -11 -4.82 5.04
 -10 -10 11 4.16 4.62
 10 10 -11 4.16 -4.62
 -10 10 11 -4.82 -5.04
 8 -10 -11 -3.70 -0.35
 -8 -10 11 4.18 2.12
 8 -10 -11 -3.70 -0.35
 -8 10 11 -3.70 0.35
 8 10 -11 4.18 -2.12
 6 -10 -11 -0.43 -0.23
 -6 -10 11 -0.94 6.88
 6 -10 -11 -0.43 -0.23
 -6 10 11 -0.43 0.23
 6 10 -11 -0.94 -6.88
 -4 -10 11 -1.62 4.19
 4 -10 -11 1.62 1.24
 4 -10 -11 1.62 1.24
 -4 10 11 1.62 -1.24
 4 10 -11 -1.62 -4.19
 2 -10 -11 -3.51 10.43
 2 -10 -11 -3.51 10.43
 -2 -10 11 3.03 -7.18
 2 10 -11 3.03 7.18
 -2 10 11 -3.51 -10.43
 0 -10 -11 -0.96 -1.38
 0 -10 11 1.19 -2.97
 0 -10 -11 -0.96 -1.38
 0 10 11 -0.96 1.38
 0 10 -11 1.19 2.97
 -2 -10 -11 3.37 -0.23
 2 -10 11 -2.79 0.24
 -2 -10 -11 3.37 -0.23
 2 10 11 3.37 0.23
 -2 10 -11 -2.79 -0.24
 -4 -10 -11 4.08 3.57
 -4 -10 -11 4.08 3.57
 4 10 11 4.08 -3.57
 -4 10 -11 -4.27 -1.83
 -6 -10 -11 2.25 5.28
 -6 -10 -11 2.25 5.28
 6 10 11 2.25 -5.28
 -6 10 -11 0.85 -3.59
 -8 -10 -11 0.45 1.70
 8 10 11 0.45 -1.70
 -8 10 -11 0.07 -0.63
 -10 -10 -11 -3.03 -2.25
 10 10 11 -3.03 2.25
 -10 10 -11 3.21 0.26
 -12 -10 -11 -2.23 -0.85
 12 10 11 -2.23 0.85
 -12 10 -11 1.68 -2.07
 -14 -10 -11 0.48 -4.25
 -14 10 -11 -1.13 -5.25
 14 10 11 0.48 4.25
 -27 -11 11 1.46 2.32
 27 -11 -11 -2.17 -1.59
 27 11 -11 1.46 -2.32
 25 -11 -11 -1.24 -2.66
 25 -11 -11 -1.24 -2.66
 -25 -11 11 1.18 0.32
 25 11 -11 1.18 -0.32
 23 -11 -11 -0.76 2.89
 23 -11 -11 -0.76 2.89
 -23 -11 11 -0.15 -1.94
 23 11 -11 -0.15 1.94
 -21 -11 11 3.16 2.60
 21 -11 -11 -2.89 4.19
 21 -11 -11 -2.89 4.19
 21 11 -11 3.16 -2.60
 19 -11 -11 2.13 2.63
 19 -11 -11 2.13 2.63
 -19 -11 11 -3.17 2.41
 19 11 -11 -3.17 -2.41
 -17 -11 11 -2.36 2.24
 17 -11 -11 2.90 -5.91
 17 -11 -11 2.90 -5.91
 17 11 -11 -2.36 -2.24
 15 -11 -11 3.74 -9.70
 -15 -11 11 -2.62 -5.74
 15 -11 -11 3.74 -9.70
 15 11 -11 -2.62 5.74
 13 -11 -11 5.00 -1.76
 -13 -11 11 -4.35 -6.64
 13 -11 -11 5.00 -1.76
 13 11 -11 -4.35 6.64
 11 -11 -11 1.80 -4.80
 -11 -11 11 -2.16 -4.50
 11 -11 -11 1.80 -4.80
 11 11 -11 -2.16 4.50
 9 -11 -11 -0.24 3.72
 9 -11 -11 -0.24 3.72
 -9 -11 11 -0.75 -5.00
 -9 11 11 -0.24 -3.72
 9 11 -11 -0.75 5.00
 7 -11 -11 -3.26 5.80
 7 -11 -11 -3.26 5.80
 -7 -11 11 3.15 -3.48
 7 11 -11 3.15 3.48
 -7 11 11 -3.26 -5.80
 5 -11 -11 -4.71 7.29
 -5 -11 11 6.44 -6.64
 5 -11 -11 -4.71 7.29
 5 11 -11 6.44 6.64
 -5 11 11 -4.71 -7.29
 3 -11 -11 -2.71 -1.84
 3 -11 -11 -2.71 -1.84
 -3 -11 11 3.21 2.98
 -3 11 11 -2.71 1.84
 3 11 -11 3.21 -2.98
 1 -11 -11 1.48 -8.16
 1 -11 -11 1.48 -8.16
 -1 -11 11 -2.42 5.72
 -1 11 11 1.48 8.16
 1 11 -11 -2.42 -5.72
 1 -11 11 -2.97 1.92
 -1 -11 -11 1.57 -0.93
 -1 -11 -11 1.57 -0.93
 -1 11 -11 -2.97 -1.92
 1 11 11 1.57 0.93
 -3 -11 -11 -3.18 -1.25
 -3 -11 -11 -3.18 -1.25
 3 -11 11 3.08 1.18
 3 11 11 -3.18 1.25
 -3 11 -11 3.08 -1.18
 -5 -11 -11 -1.28 -2.08
 -5 -11 -11 -1.28 -2.08
 5 11 11 -1.28 2.08
 -5 11 -11 0.82 0.01
 -7 -11 -11 -1.72 -1.57
 7 11 11 -1.72 1.57
 -7 11 -11 1.09 -1.26
 -9 -11 -11 -1.32 0.61
 9 11 11 -1.32 -0.61
 -9 11 -11 1.30 -2.22
 -11 -11 -11 -2.37 -1.00
 -11 11 -11 1.91 -1.19
 11 11 11 -2.37 1.00
 -13 -11 -11 0.45 0.98
 -13 11 -11 -0.13 0.48
 13 11 11 0.45 -0.98
 26 -12 -11 1.93 -1.25
 -26 -12 11 -2.21 2.02
 26 12 -11 -2.21 -2.02
 24 -12 -11 -1.74 1.88
 -24 -12 11 1.87 2.14
 24 12 -11 1.87 -2.14
 22 -12 -11 1.71 -2.62
 -22 -12 11 -1.25 0.54
 22 12 -11 -1.25 -0.54
 -20 -12 11 5.83 -3.14
 20 -12 -11 -5.71 -6.68
 20 12 -11 5.83 3.14
 -18 -12 11 5.52 -1.32
 18 -12 -11 -4.51 -3.12
 18 -12 -11 -4.51 -3.12
 18 12 -11 5.52 1.32
 16 -12 -11 -3.52 3.62
 16 -12 -11 -3.52 3.62
 -16 -12 11 1.47 -1.37
 16 12 -11 1.47 1.37
 -14 -12 11 1.83 1.64
 14 -12 -11 -2.09 3.91
 14 -12 -11 -2.09 3.91
 14 12 -11 1.83 -1.64
 12 -12 -11 -1.11 -1.41
 -12 -12 11 2.34 2.03
 12 -12 -11 -1.11 -1.41
 12 12 -11 2.34 -2.03
 10 -12 -11 -0.56 -0.45
 -10 -12 11 1.87 0.16
 10 -12 -11 -0.56 -0.45
 10 12 -11 1.87 -0.16
 -8 -12 11 1.31 5.17
 8 -12 -11 -0.29 -4.28
 8 -12 -11 -0.29 -4.28
 -8 12 11 -0.29 4.28
 8 12 -11 1.31 -5.17
 6 -12 -11 1.30 -5.63
 -6 -12 11 -1.91 4.47
 6 -12 -11 1.30 -5.63
 -6 12 11 1.30 5.63
 6 12 -11 -1.91 -4.47
 -4 -12 11 -2.53 0.76
 4 -12 -11 2.11 -4.30
 4 -12 -11 2.11 -4.30
 -4 12 11 2.11 4.30
 4 12 -11 -2.53 -0.76
 -2 -12 11 3.54 -1.65
 2 -12 -11 -3.44 0.35
 2 -12 -11 -3.44 0.35
 -2 12 11 -3.44 -0.35
 2 12 -11 3.54 1.65
 0 -12 -11 -4.65 2.27
 0 -12 -11 -4.65 2.27
 0 -12 11 6.24 -0.44
 0 12 11 -4.65 -2.27
 0 12 -11 6.24 0.44
 -2 -12 -11 -0.96 -3.87
 -2 -12 -11 -0.96 -3.87
 2 -12 11 0.95 -0.53
 2 12 11 -0.96 3.87
 -2 12 -11 0.95 0.53
 -4 -12 -11 0.65 -1.35
 -4 -12 -11 0.65 -1.35
 4 12 11 0.65 1.35
 -4 12 -11 -0.18 -0.58
 -6 -12 -11 0.51 -1.18
 -6 -12 -11 0.51 -1.18
 6 12 11 0.51 1.18
 -6 12 -11 -1.14 3.18
 -8 -12 -11 1.01 -1.10
 8 12 11 1.01 1.10
 -8 12 -11 -0.54 1.19
 -10 -12 -11 3.59 2.41
 -10 12 -11 -3.34 1.59
 10 12 11 3.59 -2.41
 -23 -13 11 -2.59 1.25
 23 -13 -11 2.70 -2.27
 23 13 -11 -2.59 -1.25
 21 -13 -11 3.70 -0.01
 -21 -13 11 -3.88 1.48
 21 13 -11 -3.88 -1.48
 19 -13 -11 4.39 5.05
 -19 -13 11 -5.26 2.09
 19 13 -11 -5.26 -2.09
 17 -13 -11 1.64 0.59
 -17 -13 11 -1.72 -0.92
 17 13 -11 -1.72 0.92
 15 -13 -11 -3.88 1.70
 -15 -13 11 3.35 3.48
 15 13 -11 3.35 -3.48
 -13 -13 11 2.15 1.53
 13 -13 -11 -3.44 0.61
 13 13 -11 2.15 -1.53
 11 -13 -11 -3.74 6.45
 11 -13 -11 -3.74 6.45
 -11 -13 11 1.51 3.00
 11 13 -11 1.51 -3.00
 9 -13 -11 -2.13 -1.13
 9 -13 -11 -2.13 -1.13
 -9 -13 11 1.79 2.58
 9 13 -11 1.79 -2.58
 7 -13 -11 -0.46 2.12
 -7 -13 11 0.84 -4.74
 7 -13 -11 -0.46 2.12
 -7 13 11 -0.46 -2.12
 7 13 -11 0.84 4.74
 -5 -13 11 2.49 -0.11
 5 -13 -11 -2.39 0.00
 5 -13 -11 -2.39 0.00
 -5 13 11 -2.39 0.00
 5 13 -11 2.49 0.11
 -3 -13 11 -0.82 -0.99
 3 -13 -11 0.56 -0.24
 3 -13 -11 0.56 -0.24
 -3 13 11 0.56 0.24
 3 13 -11 -0.82 0.99
 1 -13 -11 2.70 0.20
 1 -13 -11 2.70 0.20
 -1 -13 11 -2.16 1.28
 1 13 -11 -2.16 -1.28
 -1 13 11 2.70 -0.20
 -1 -13 -11 -0.05 0.81
 1 -13 11 -0.26 1.48
 -1 -13 -11 -0.05 0.81
 -1 13 -11 -0.26 -1.48
 1 13 11 -0.05 -0.81
 -3 -13 -11 1.42 0.20
 -3 -13 -11 1.42 0.20
 -3 13 -11 -0.82 0.73
 3 13 11 1.42 -0.20
 -5 -13 -11 0.76 -0.97
 -5 -13 -11 0.76 -0.97
 5 13 11 0.76 0.97
 -5 13 -11 -0.59 -3.98
 -7 -13 -11 2.43 2.08
 -7 13 -11 -2.61 -1.04
 7 13 11 2.43 -2.08
 -9 -13 -11 -1.80 -2.07
 9 13 11 -1.80 2.07
 -9 13 -11 1.34 -2.29
 -20 -14 11 -0.10 -0.65
 20 -14 -11 0.53 0.40
 20 14 -11 -0.10 0.65
 18 -14 -11 -1.22 -3.53
 -18 -14 11 1.47 -1.10
 18 14 -11 1.47 1.10
 16 -14 -11 0.99 -3.50
 -16 -14 11 -1.01 -4.70
 16 14 -11 -1.01 4.70
 14 -14 -11 3.73 -4.93
 -14 -14 11 -2.65 -4.31
 14 14 -11 -2.65 4.31
 12 -14 -11 1.91 -4.59
 -12 -14 11 -1.79 -3.65
 12 14 -11 -1.79 3.65
 -10 -14 11 -3.81 -2.12
 10 -14 -11 4.63 -1.17
 10 14 -11 -3.81 2.12
 8 -14 -11 1.25 1.42
 -8 -14 11 -2.76 0.43
 8 14 -11 -2.76 -0.43
 -6 -14 11 -2.43 2.87
 6 -14 -11 1.85 3.06
 -6 14 11 1.85 -3.06
 6 14 -11 -2.43 -2.87
 -4 -14 11 -2.43 4.44
 4 -14 -11 3.38 2.03
 -4 14 11 3.38 -2.03
 4 14 -11 -2.43 -4.44
 2 -14 -11 0.55 -0.79
 2 -14 -11 0.55 -0.79
 -2 -14 11 0.02 1.80
 -2 14 11 0.55 0.79
 2 14 -11 0.02 -1.80
 0 -14 -11 1.95 -3.15
 0 -14 11 -2.30 0.57
 0 -14 -11 1.95 -3.15
 0 14 -11 -2.30 -0.57
 0 14 11 1.95 3.15
 -2 -14 -11 0.88 2.54
 -2 -14 -11 0.88 2.54
 2 14 11 0.88 -2.54
 -2 14 -11 -0.98 -3.58
 -4 -14 -11 -0.35 2.00
 -4 -14 -11 -0.35 2.00
 -4 14 -11 -1.19 0.98
 4 14 11 -0.35 -2.00
 -6 -14 -11 -1.73 -1.56
 -6 14 -11 1.57 -0.82
 6 14 11 -1.73 1.56
 17 -15 -11 -1.73 1.25
 -17 -15 11 1.31 0.93
 17 15 -11 1.31 -0.93
 15 -15 -11 0.89 1.73
 -15 -15 11 -0.86 2.60
 15 15 -11 -0.86 -2.60
 13 -15 -11 -0.06 2.65
 -13 -15 11 -1.04 1.12
 13 15 -11 -1.04 -1.12
 -11 -15 11 0.91 1.75
 11 -15 -11 0.02 -2.25
 11 15 -11 0.91 -1.75
 -9 -15 11 1.06 -0.18
 9 -15 -11 -0.88 -2.89
 9 15 -11 1.06 0.18
 -7 -15 11 2.59 -0.87
 7 -15 -11 -0.40 -9.34
 7 15 -11 2.59 0.87
 5 -15 -11 -2.50 -8.14
 -5 -15 11 3.00 -2.82
 -5 15 11 -2.50 8.14
 5 15 -11 3.00 2.82
 3 -15 -11 0.22 -2.13
 -3 -15 11 -1.03 0.79
 3 15 -11 -1.03 -0.79
 -3 15 11 0.22 2.13
 -1 -15 11 -2.58 1.65
 1 -15 -11 2.91 3.62
 -1 15 11 2.91 -3.62
 1 15 -11 -2.58 -1.65
 1 -15 11 -1.88 -1.59
 -1 -15 -11 2.03 1.20
 -1 15 -11 -1.88 1.59
 1 15 11 2.03 -1.20
 -3 -15 -11 1.33 -1.33
 -3 15 -11 -1.31 -0.46
 3 15 11 1.33 1.33
 10 -16 -11 1.53 0.30
 -10 -16 11 -2.17 -0.09
 10 16 -11 -2.17 0.09
 -8 -16 11 -3.65 2.29
 8 -16 -11 3.28 4.23
 8 16 -11 -3.65 -2.29
 6 -16 -11 5.33 8.35
 -6 -16 11 -6.56 6.28
 6 16 -11 -6.56 -6.28
 -4 -16 11 -1.19 0.59
 4 -16 -11 1.65 4.72
 -4 16 11 1.65 -4.72
 4 16 -11 -1.19 -0.59
 34 0 -12 -3.55 -0.47
 32 0 -12 -4.67 -0.98
 30 0 -12 -4.81 -0.13
 28 0 -12 -9.70 2.59
 26 0 -12 -3.20 -1.22
 24 0 -12 2.93 3.57
 22 0 -12 12.93 1.95
 20 0 -12 3.18 3.74
 18 0 -12 -3.95 1.29
 16 0 -12 -10.21 1.79
 16 0 -12 -10.21 1.79
 14 0 -12 5.70 2.50
 14 0 -12 5.70 2.50
 12 0 -12 20.89 -5.89
 12 0 -12 20.89 -5.89
 10 0 -12 9.42 1.33
 10 0 -12 9.42 1.33
 8 0 -12 21.68 2.51
 6 0 -12 -36.44 4.72
 4 0 -12 -6.08 6.70
 2 0 -12 4.23 -1.74
 0 0 -12 5.02 -2.40
 -2 0 -12 3.98 -4.38
 -4 0 -12 3.43 -9.57
 -6 0 -12 3.69 0.60
 -8 0 -12 0.54 1.50
 -10 0 -12 -5.98 -1.72
 -12 0 -12 -2.13 -6.88
 -14 0 -12 -1.20 -0.84
 -16 0 -12 5.29 -8.20
 -18 0 -12 5.63 5.74
 35 -1 -12 1.10 -1.51
 35 1 -12 1.45 0.53
 33 -1 -12 5.96 0.00
 33 1 -12 6.68 1.85
 31 -1 -12 4.07 1.97
 31 1 -12 5.12 -1.15
 29 -1 -12 3.07 2.46
 29 1 -12 3.51 -2.59
 27 -1 -12 5.98 1.38
 27 1 -12 5.16 -1.37
 25 -1 -12 2.07 0.59
 25 1 -12 1.17 -2.05
 23 -1 -12 -4.58 -0.39
 23 1 -12 -4.90 -1.36
 21 -1 -12 -3.02 -1.26
 21 1 -12 -3.37 -2.42
 19 -1 -12 4.54 -0.49
 19 1 -12 4.73 -0.83
 19 1 -12 4.73 -0.83
 17 -1 -12 9.89 0.19
 17 -1 -12 9.89 0.19
 17 1 -12 10.42 -0.43
 17 1 -12 10.42 -0.43
 15 -1 -12 10.77 -4.30
 15 -1 -12 10.77 -4.30
 15 1 -12 11.02 -5.49
 15 1 -12 11.02 -5.49
 13 -1 -12 2.15 -0.66
 13 -1 -12 2.15 -0.66
 13 1 -12 2.14 -4.01
 13 1 -12 2.14 -4.01
 11 -1 -12 7.39 3.05
 11 -1 -12 7.39 3.05
 11 -1 -12 7.39 3.05
 11 1 -12 6.85 0.60
 11 1 -12 6.85 0.60
 9 -1 -12 -0.35 -0.06
 9 -1 -12 -0.35 -0.06
 9 1 -12 0.33 -0.33
 9 1 -12 0.33 -0.33
 7 -1 -12 7.75 -0.67
 7 -1 -12 7.75 -0.67
 7 1 -12 7.77 1.85
 7 1 -12 7.77 1.85
 5 -1 -12 8.87 -4.16
 5 -1 -12 8.87 -4.16
 5 1 -12 8.71 -0.75
 3 -1 -12 -14.57 -0.89
 -3 -1 12 -14.46 -3.09
 3 1 -12 -14.46 3.09
 1 -1 -12 -12.27 -1.03
 1 1 -12 -12.06 1.37
 -1 -1 -12 -3.79 -0.84
 -1 1 -12 -3.95 -1.88
 -3 -1 -12 1.44 2.40
 -3 1 -12 1.24 4.47
 -5 -1 -12 0.07 2.80
 -5 1 -12 -0.77 0.93
 -7 -1 -12 -2.80 0.70
 -7 1 -12 -3.01 -2.56
 -9 -1 -12 2.08 -1.11
 -9 1 -12 1.28 -2.51
 -11 -1 -12 4.67 0.42
 -11 1 -12 4.30 0.75
 -13 -1 -12 1.26 -0.98
 -13 1 -12 1.03 4.07
 -15 -1 -12 -1.82 6.26
 -15 1 -12 -1.49 5.20
 -17 -1 -12 -5.78 1.27
 -17 1 -12 -4.41 0.70
 -19 -1 -12 -2.51 -2.40
 -19 1 -12 -2.31 -2.67
 34 -2 -12 -2.39 2.89
 34 2 -12 -2.66 -0.98
 32 -2 -12 -5.71 -2.19
 32 2 -12 -6.09 0.56
 30 -2 -12 1.00 -5.97
 30 2 -12 0.80 6.22
 28 -2 -12 2.42 -3.60
 28 2 -12 2.74 -0.01
 26 -2 -12 -4.53 -2.66
 26 2 -12 -3.66 7.39
 24 -2 -12 2.04 -4.60
 24 2 -12 3.09 -0.31
 22 -2 -12 4.40 -1.35
[truncated: 798,219 more chars]
